# Supplementary material
Source: PubMed Central journal article supplement (PMC4234439)

## SUPPORTING INFORMATION

### Orally Bioavailable 6-Chloro-7-methoxy-4(1*H*)-quinolones Efficacious against Multiple Stages of *Plasmodium*

*R. Matthew Cross*,<sup>§, ‡</sup> *David L. Flanigan*,<sup>§, ‡</sup> *Andrii Monastyrskyi*,<sup>§</sup> *Alexis N. LaCruce*,<sup>‡</sup> *Fabián E. Sáenz*,<sup>‡, †</sup> *Jordany R. Maignan*,<sup>§</sup> *Tina S. Mutka*,<sup>‡</sup> *Karen L. White*,<sup>£</sup> *David M. Shackleford*,<sup>£</sup> *Ian Bathurst*,<sup>€J</sup> *Frank R Fronczek*,<sup>#</sup> *Lukasz Wojtas*,<sup>§</sup> *Wayne C. Guida*,<sup>§</sup> *Susan A. Charman*,<sup>£</sup> *Jeremy N. Burrows*,<sup>€</sup> *Dennis E. Kyle*,<sup>‡</sup> and *Roman Manetsch*<sup>\*,§</sup>

<sup>§</sup>Department of Chemistry, University of South Florida, CHE 205, 4202 E. Fowler Ave, Tampa, Florida 33620, USA; <sup>‡</sup>Department of Global Health, College of Public Health, University of South Florida, 3720 Spectrum Blvd, Suite 304, Tampa, Florida 33612, USA; <sup>£</sup>Centre for Drug Candidate Optimisation, Monash Institute of Pharmaceutical Sciences, Monash University, Parkville, Victoria 3052, Australia; <sup>#</sup>Department of Chemistry, Louisiana State University, Baton Rouge, LA 70803, USA; <sup>€</sup>Medicines for Malaria Venture, 20, rte de Pré-Bois, P.O. Box 1826, 1215 Geneva 15, Switzerland.

<sup>‡</sup>These authors contributed equally.

**Table S1. Physicochemical Properties**

| Compound | Human Liver<br>Microsomal<br>CL <sub>int</sub><br>( $\mu\text{L}/\text{min}/\text{mg}$<br>protein) | Kinetic Solubility<br>pH 7.4 <sup>a</sup><br>( $\mu\text{M}$ ) | Pe<br>pH 7.4 <sup>b</sup><br>( $10^{-6}$ cm/s) | Log D<br>pH 7.4 <sup>c</sup> |
|----------|----------------------------------------------------------------------------------------------------|----------------------------------------------------------------|------------------------------------------------|------------------------------|
| 3        | 56                                                                                                 | 6-12                                                           | 57                                             | 2.4                          |
| 4        | 17                                                                                                 | 2-6                                                            | 48                                             | 1.7                          |
| 12       | 25                                                                                                 | 6-12                                                           | 191                                            | 2.5                          |
| 13       | 21                                                                                                 | < 2                                                            | < 5                                            | 2.8                          |
| 14       | N.D. <sup>e</sup>                                                                                  | < 2                                                            | 549                                            | 3.0                          |
| 15       | N.D.                                                                                               | 2-6                                                            | 406                                            | 3.3                          |
| 16       | N.D.                                                                                               | 2-6                                                            | 443                                            | 2.9                          |
| 17       | 34                                                                                                 | < 2                                                            | N.D.                                           | 3.6                          |
| 18       | N.D.                                                                                               | < 2                                                            | < 5                                            | 3.8                          |
| 19       | N.D.                                                                                               | N.D.                                                           | 38                                             | N.D.                         |
| 20       | 11                                                                                                 | $\geq 20$                                                      | 10                                             | 4.1                          |
| 21       | 15                                                                                                 | 6-12                                                           | < 5                                            | 1.8                          |
| 22       | N.D.                                                                                               | $\geq 20$                                                      | 11                                             | N.D.                         |
| 23       | 20                                                                                                 | 6-12                                                           | 137                                            | 1.9                          |
| 24       | 34                                                                                                 | $\geq 20$                                                      | < 5                                            | 1.9                          |
| 25       | 59                                                                                                 | N.D.                                                           | < 5                                            | 2.1                          |
| 26       | 93                                                                                                 | N.D.                                                           | 67                                             | 2.0                          |
| 27       | < 7 <sup>d</sup>                                                                                   | $\geq 20$                                                      | 24                                             | 1.8                          |
| 28       | N.D.                                                                                               | N.D.                                                           | 256                                            | N.D.                         |
| 29       | 29                                                                                                 | < 2                                                            | 73                                             | 3.2                          |
| 30       | N.D.                                                                                               | < 2                                                            | 241                                            | 3.5                          |
| 31       | N.D.                                                                                               | < 2                                                            | 178                                            | 2.4                          |
| 32       | N.D.                                                                                               | < 2                                                            | 46                                             | 3.5                          |
| 33       | < 7 <sup>d</sup>                                                                                   | < 2                                                            | 97                                             | 2.4                          |
| 34       | 8                                                                                                  | < 2                                                            | 427                                            | 3.3                          |
| 35       | N.D.                                                                                               | < 2                                                            | 107                                            | 2.2                          |
| 36       | 11                                                                                                 | < 2                                                            | < 5                                            | 2.3                          |
| 37       | N.D.                                                                                               | N.D.                                                           | < 5                                            | N.D.                         |
| 38       | N.D.                                                                                               | N.D.                                                           | 198                                            | N.D.                         |
| 39       | 15                                                                                                 | 2-6                                                            | 238                                            | 2.6                          |
| 40       | 17                                                                                                 | < 2                                                            | 119                                            | 2.2                          |
| 41       | < 7 <sup>d</sup>                                                                                   | N.D.                                                           | 8                                              | 1.8                          |
| 42       | N.D.                                                                                               | 12-20                                                          | 19                                             | 1.8                          |
| 43       | < 7 <sup>d</sup>                                                                                   | N.D.                                                           | 9                                              | 3.5                          |
| 44       | < 7 <sup>d</sup>                                                                                   | N.D.                                                           | < 5                                            | 1.8                          |
| 45       | 14                                                                                                 | < 2                                                            | < 5                                            | 3.7                          |
| 46       | 19                                                                                                 | < 2                                                            | 41                                             | 3.7                          |
| 47       | N.D.                                                                                               | < 2                                                            | < 5                                            | 3.5                          |
| 48       | 22                                                                                                 | 2-6                                                            | < 5                                            | 3.7                          |
| 49       | 31                                                                                                 | 2-6                                                            | 65                                             | 2.6                          |
| 50       | 9                                                                                                  | 2-6                                                            | 315                                            | 2.6                          |
| 51       | N.D.                                                                                               | N.D.                                                           | 151                                            | 2.1                          |
| 52       | < 7 <sup>d</sup>                                                                                   | < 2                                                            | < 5                                            | 2.4                          |
| 53       | N.D.                                                                                               | < 2                                                            | < 5                                            | 4.0                          |
| 54       | N.D.                                                                                               | N.D.                                                           | 688                                            | N.D.                         |
| 55       | N.D.                                                                                               | < 2                                                            | 145                                            | 2.9                          |
| 56       | N.D.                                                                                               | N.D.                                                           | 275                                            | 2.7                          |
| 57       | N.D.                                                                                               | N.D.                                                           | 411                                            | 3.0                          |
| 58       | < 7 <sup>d</sup>                                                                                   | < 2                                                            | 6                                              | 3.4                          |

<sup>a</sup>Standards for the solubility assay include carbamazepine and albendazole. Solubility for carbamazepine at pH 7.4, 4.0, and 2.0 was 95  $\mu\text{M}$ , 100  $\mu\text{M}$ , and 100  $\mu\text{M}$ , respectively. Solubility for albendazole at pH 7.4, 4.0, and 2.0 was 6.1  $\mu\text{M}$ , 12  $\mu\text{M}$ , and 100  $\mu\text{M}$  respectively.

<sup>b</sup>Standards for the permeability assay include verapamil HCl ( $P_e = 1405 \times 10^{-6}$  cm/s at pH=7.4 and  $39 \times 10^{-6}$  cm/s at pH=4.0), carbamazepine ( $P_e = 112 \times 10^{-6}$  cm/s at pH=7.4 and  $108 \times 10^{-6}$  cm/s at pH=4.0), and ranitidine HCl ( $P_e = 0.5 \times 10^{-6}$  cm/s at pH=7.4 and  $0 \times 10^{-6}$  cm/s at pH=4.0).

<sup>c</sup>Standards for the  $\log D_{7.4}$  assay include cinnarizine ( $\log D_{7.4}$  5.68), hydrocortisone-21-acetate ( $\log D_{7.4}$  2.19), ketoconazole ( $\log D_{7.4}$  3.83), metronidazole ( $\log D_{7.4}$  -0.02), nadolol ( $\log D_{7.4}$  0.68), pyrene ( $\log D_{7.4}$  4.88), theophylline ( $\log D_{7.4}$  -0.05), and tolnaftate ( $\log D_{7.4}$  5.40).

<sup>d</sup>These compounds displayed little to no observable degradation throughout the assay duration (typically 250 min).

<sup>e</sup>N.D. Not determined

**Figure S1.** Plot of in vitro efficacy versus distribution coefficient  $\log D_{7.4}$ .

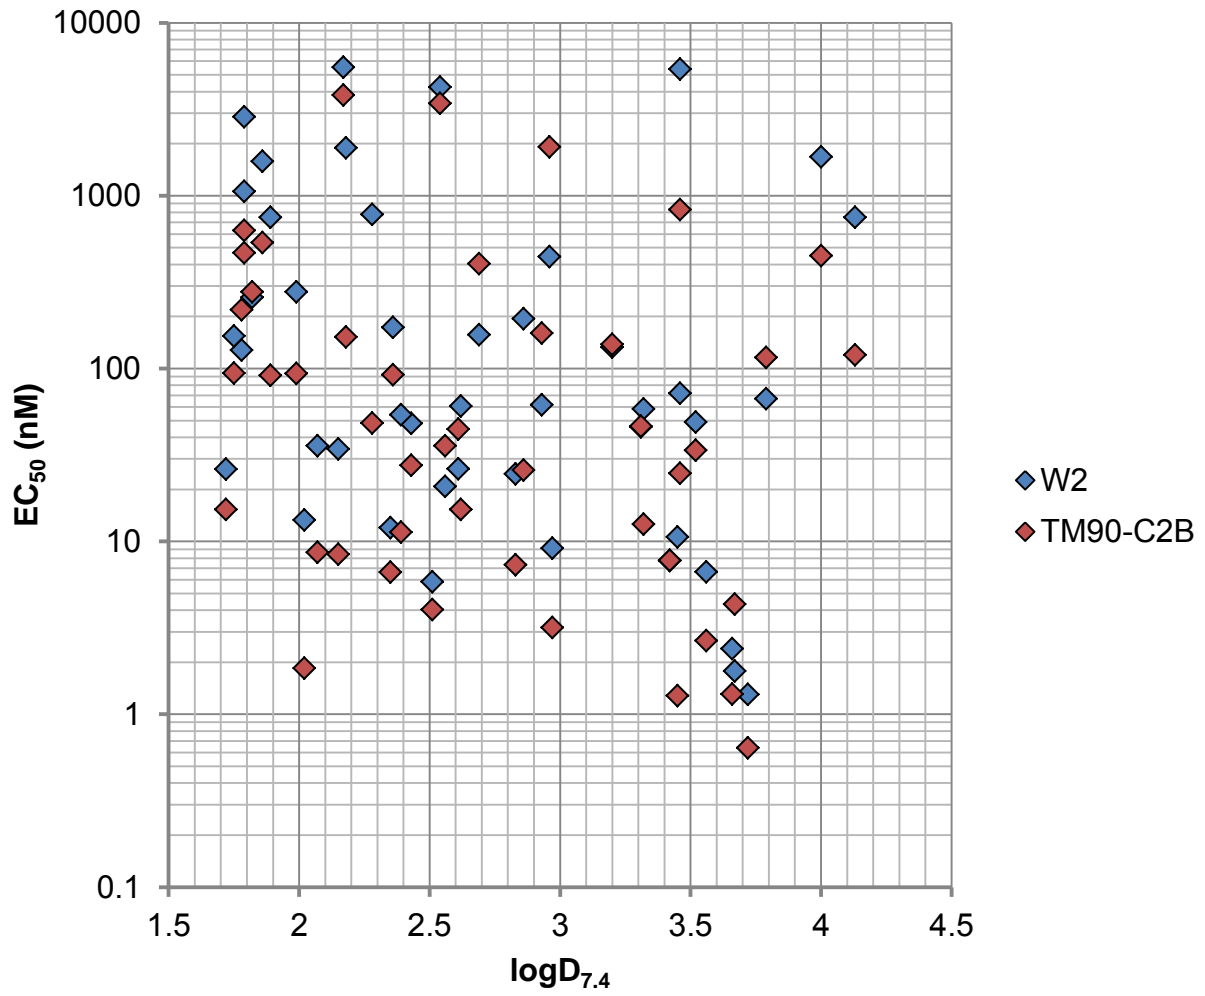

## X-ray Crystallography

---

**Crystal Data:** **4**, C<sub>17</sub>H<sub>14</sub>ClNO<sub>2</sub>, FW=299.74, monoclinic P2<sub>1</sub>/c, a=22.483(2), b=5.7461(5), c=11.0799(10) Å, β=104.036(5)°, T=100K, Z=4, R=0.030, GOF=1.025, CCDC 1023754; **12**, C<sub>18</sub>H<sub>16</sub>ClNO<sub>2</sub>, FW=313.77, monoclinic P2<sub>1</sub>/c, a=23.770(2), b=9.7135(10), c=13.4414(15) Å, β=92.364(5)°, T=100K, Z=8, R=0.047, GOF=1.040, CCDC 1023753.

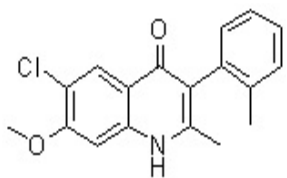

**12**  
<sup>1</sup>H, 400 MHz, DMSO

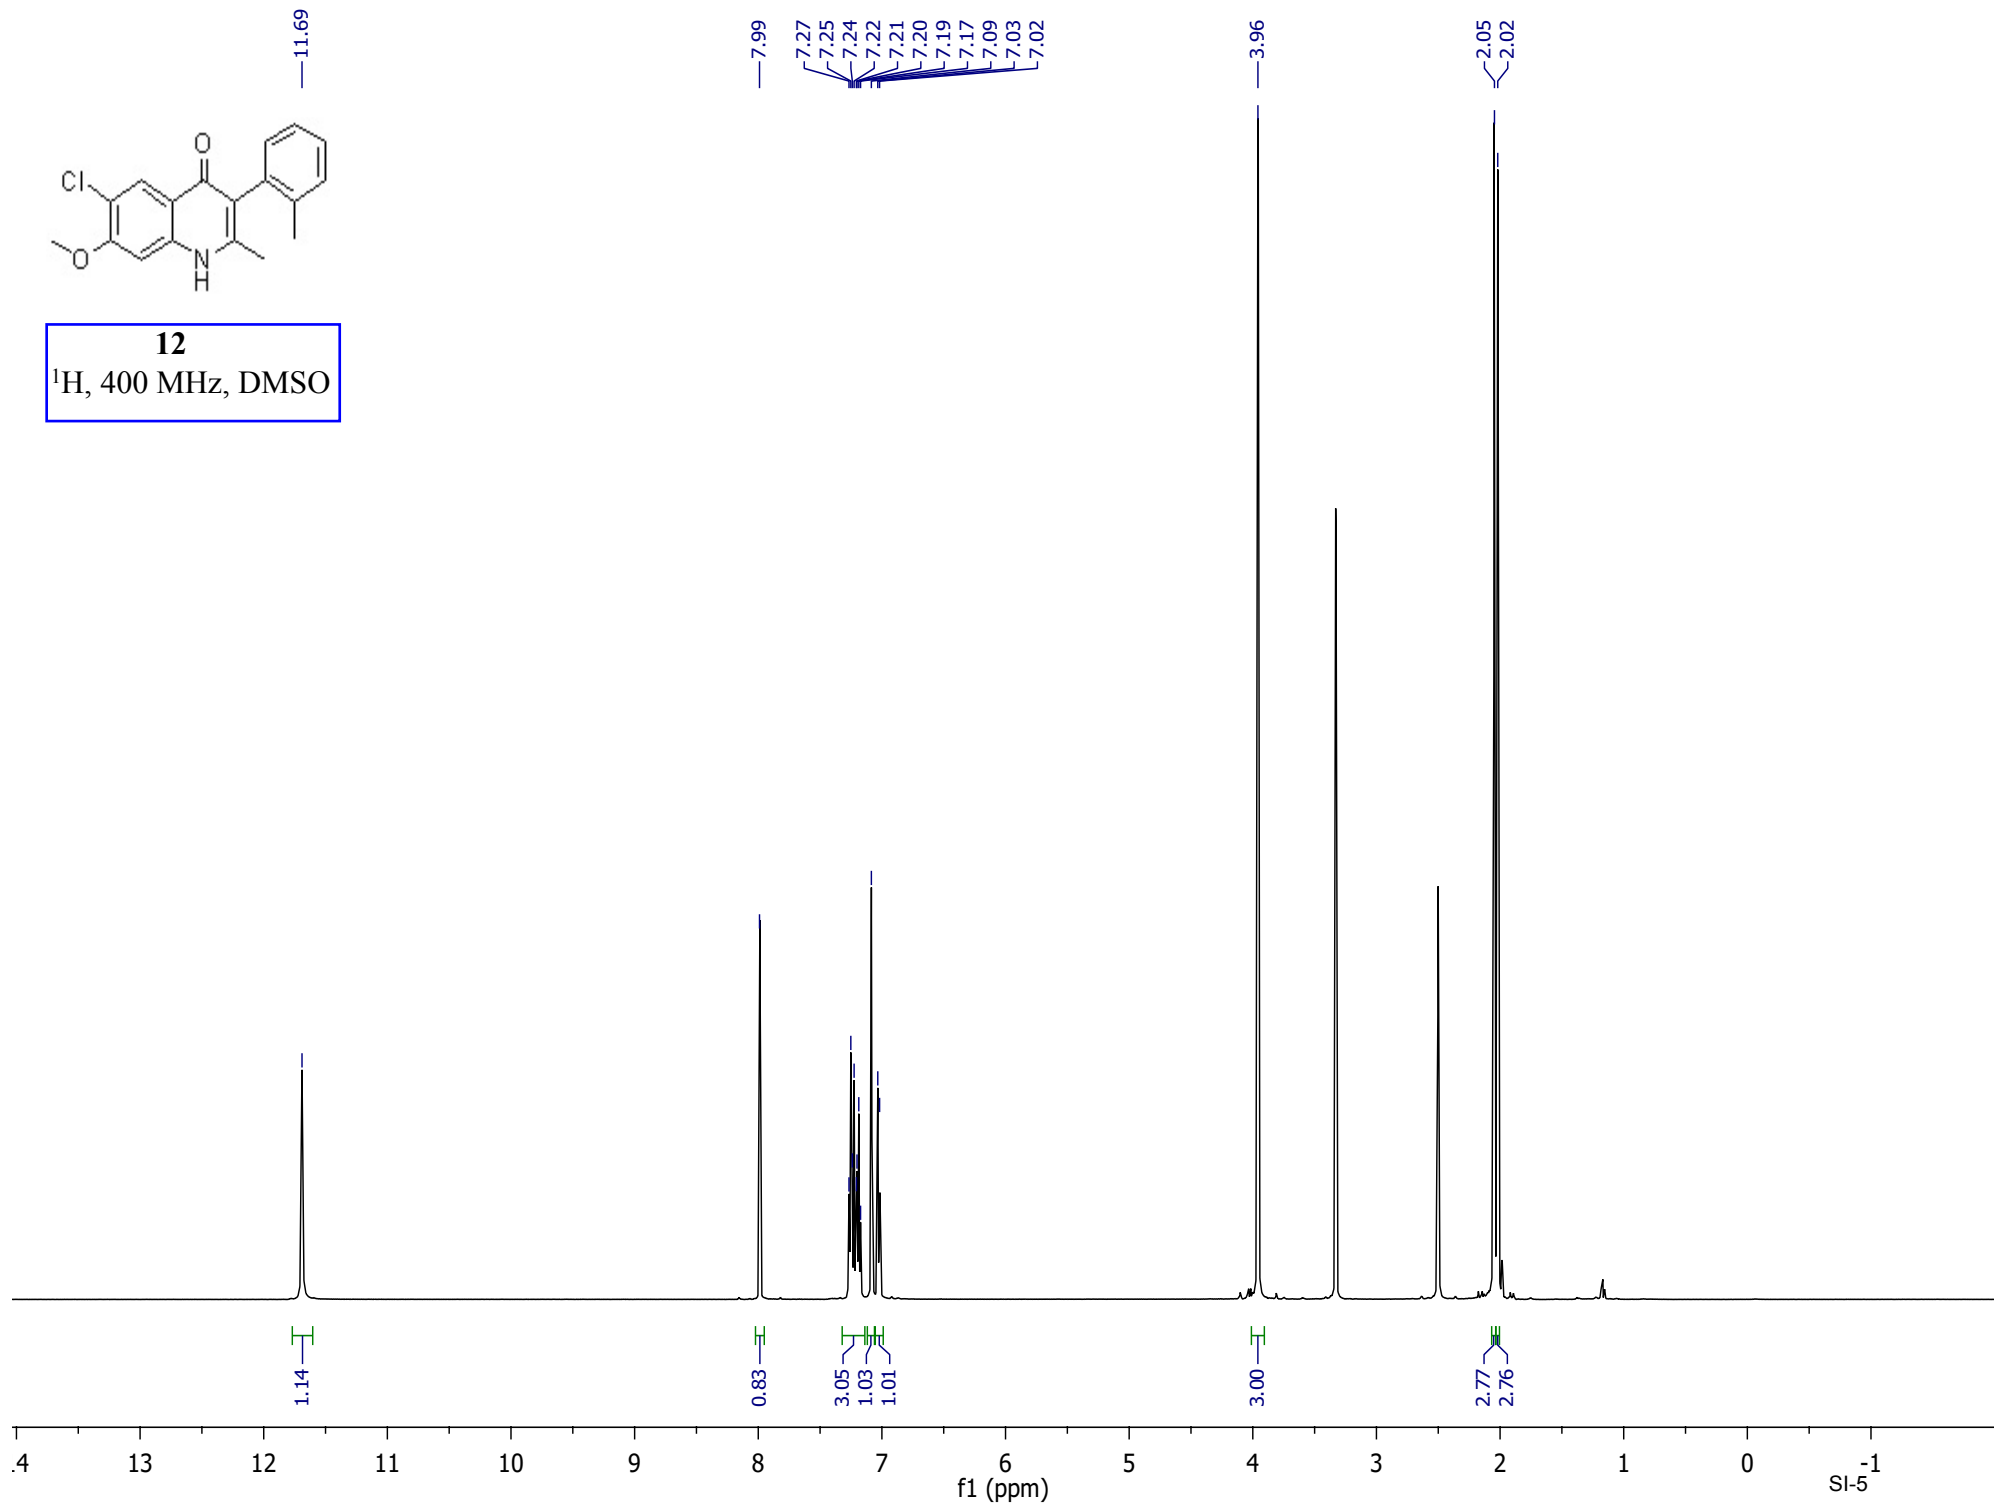



**12**

$^{13}\text{C}$ , 101 MHz, DMSO

—173.18

—156.63

—146.56

—139.74

—137.39

—135.95

—130.84

—125.51

—120.45

—118.60

—117.93

—99.46

—56.39

—19.35

—18.43

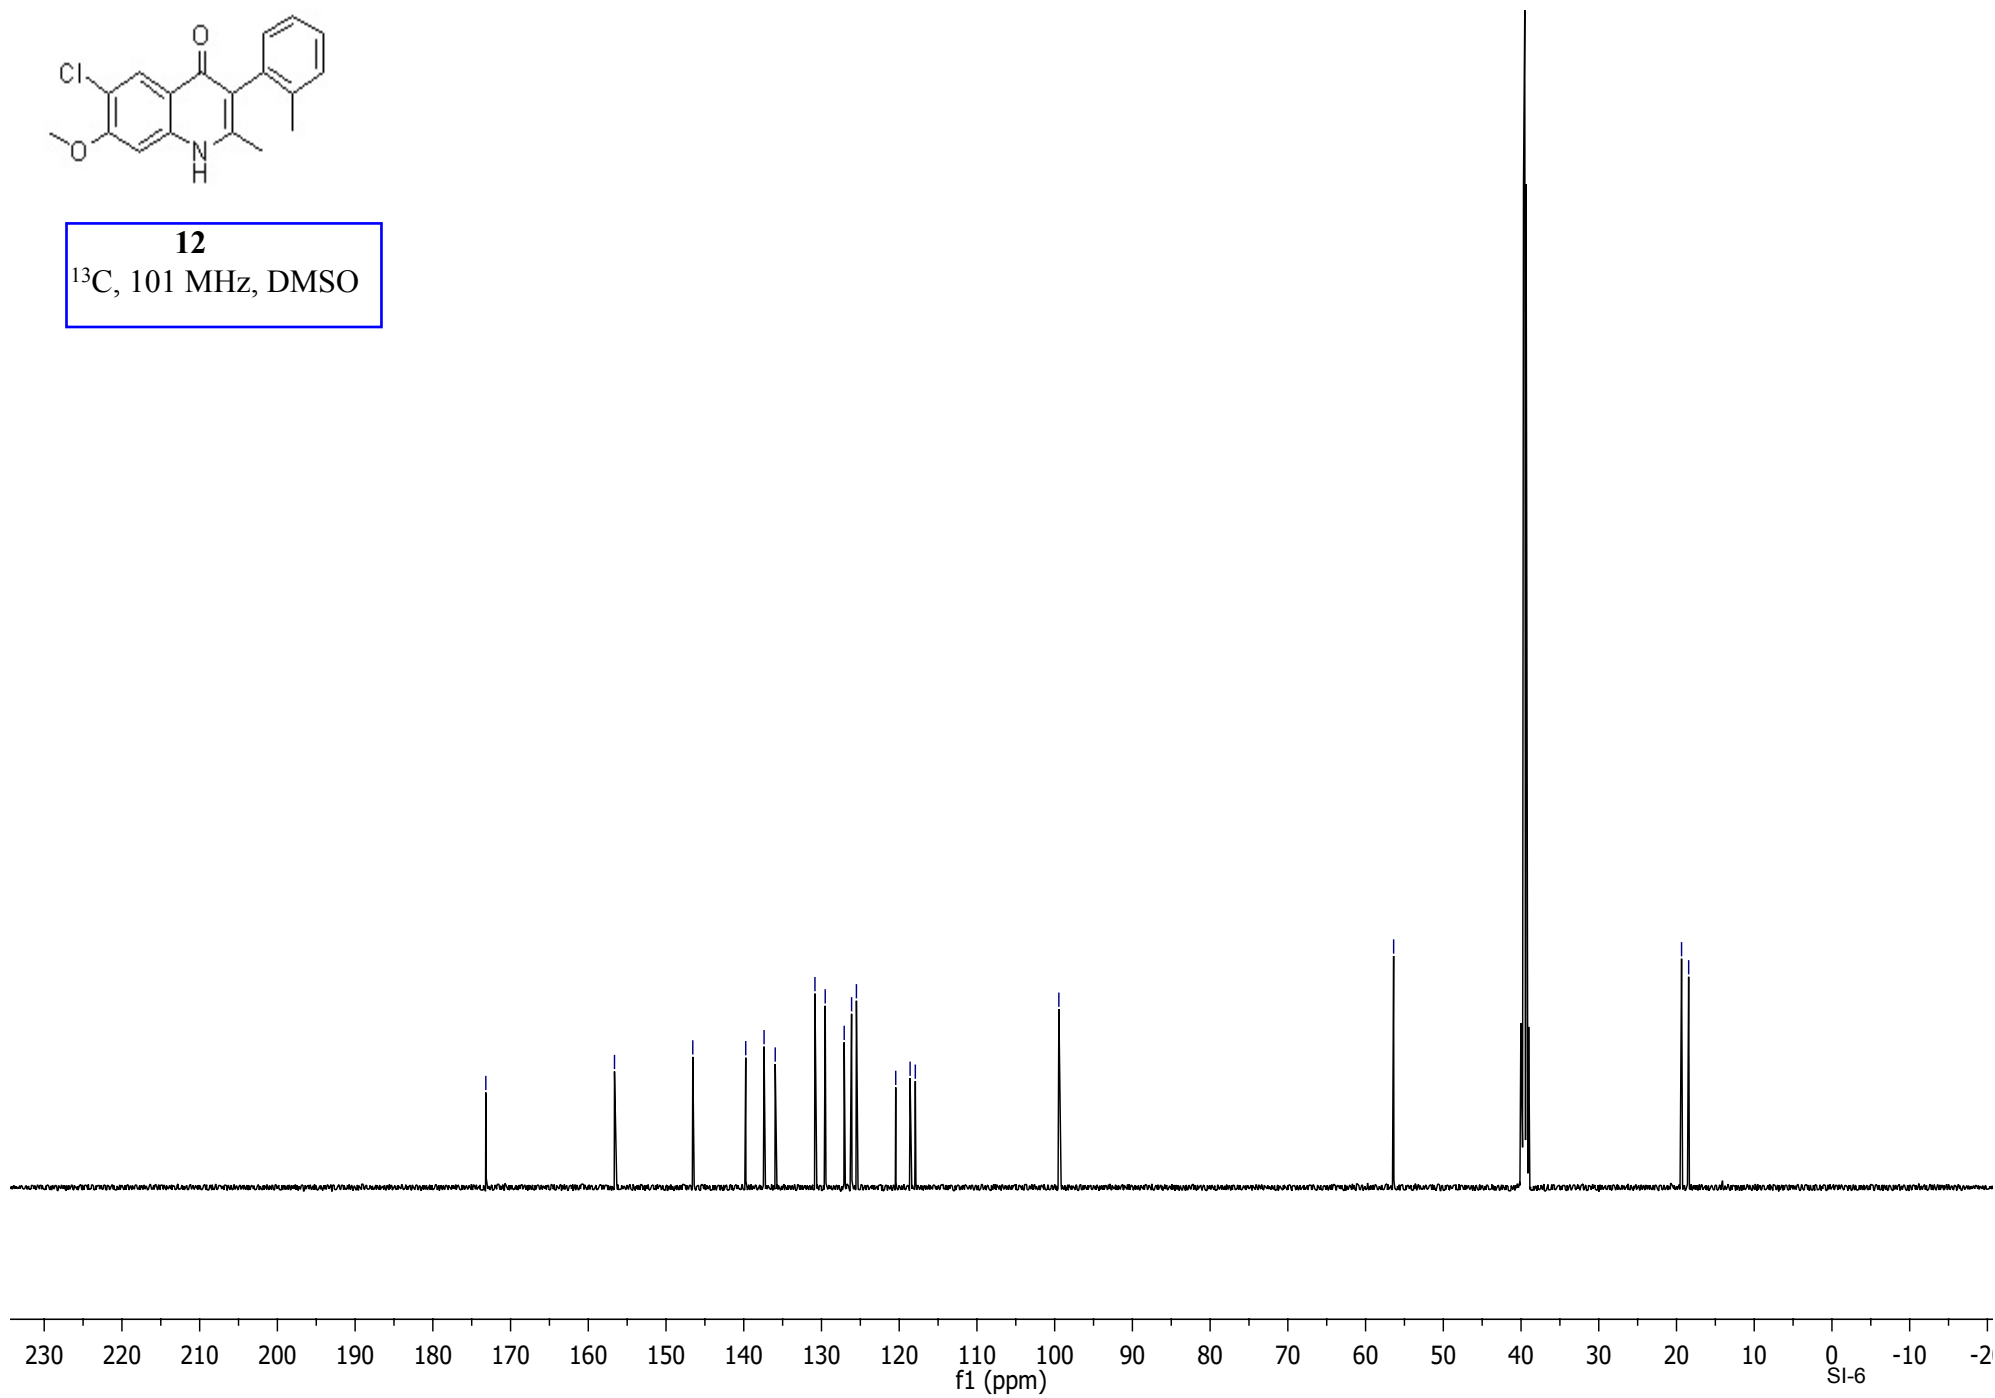

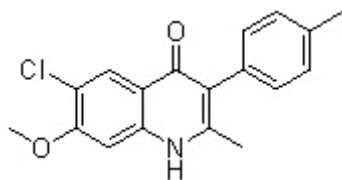

**13**  
<sup>1</sup>H, 400 MHz, DMSO

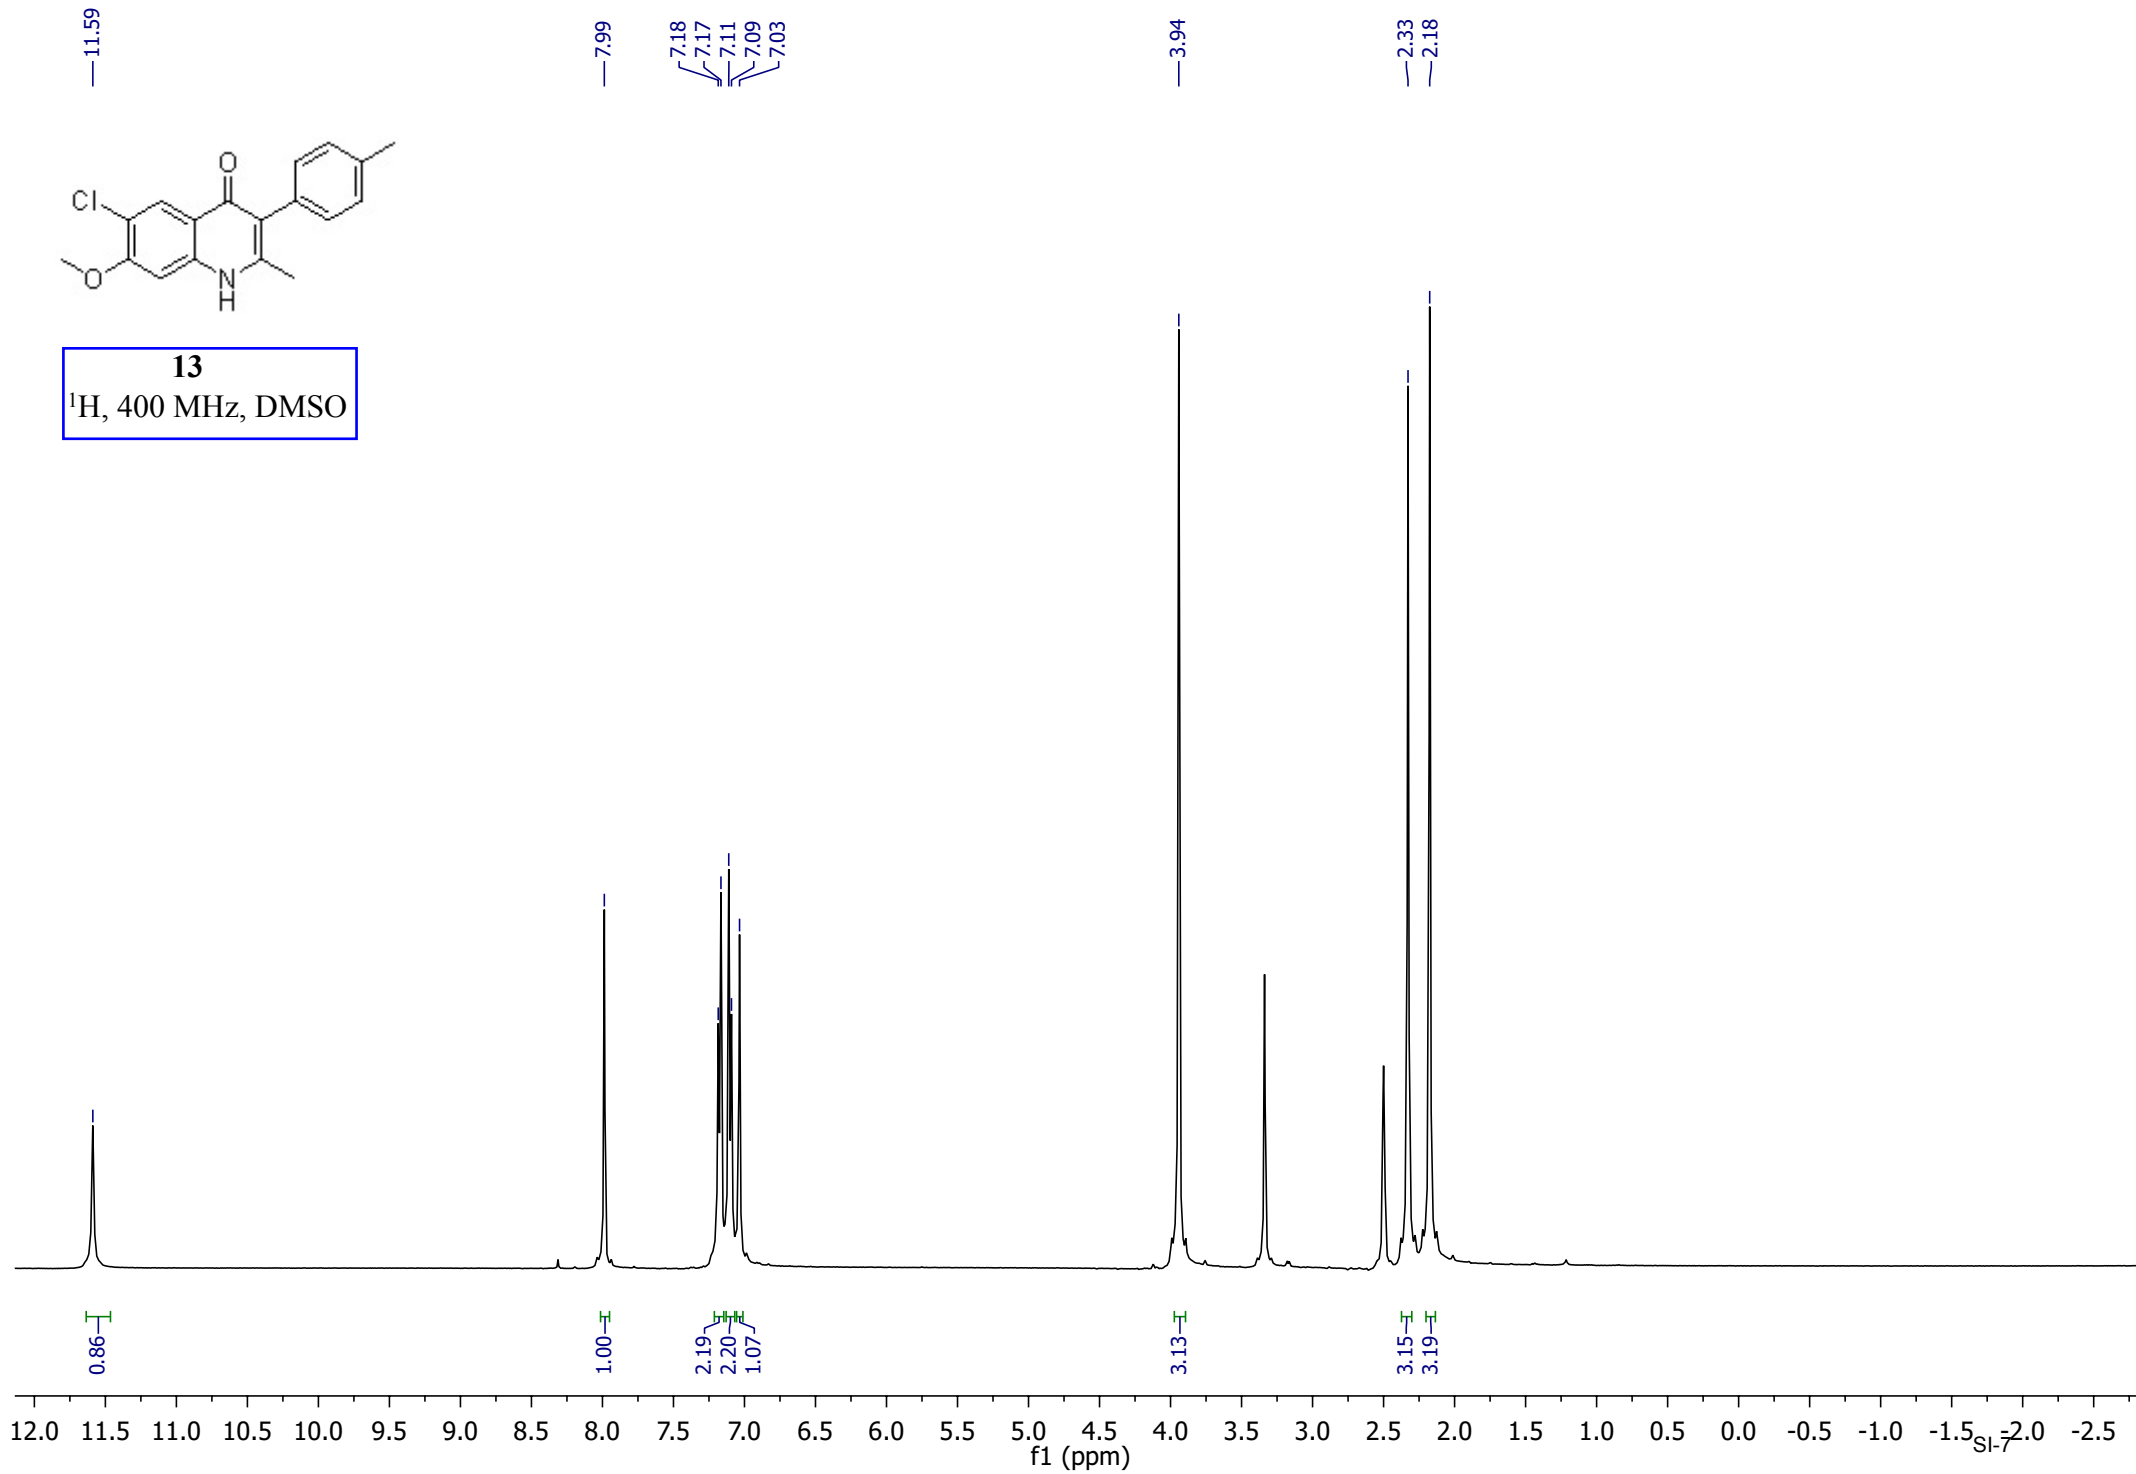





**13**

<sup>13</sup>C, 101 MHz, DMSO

—173.58

—156.59

—146.34

—139.54

—135.51

—132.79

—130.76

—128.35

—126.17

—120.65

—118.74

—117.86

—99.35

—56.33

—20.81

—18.83

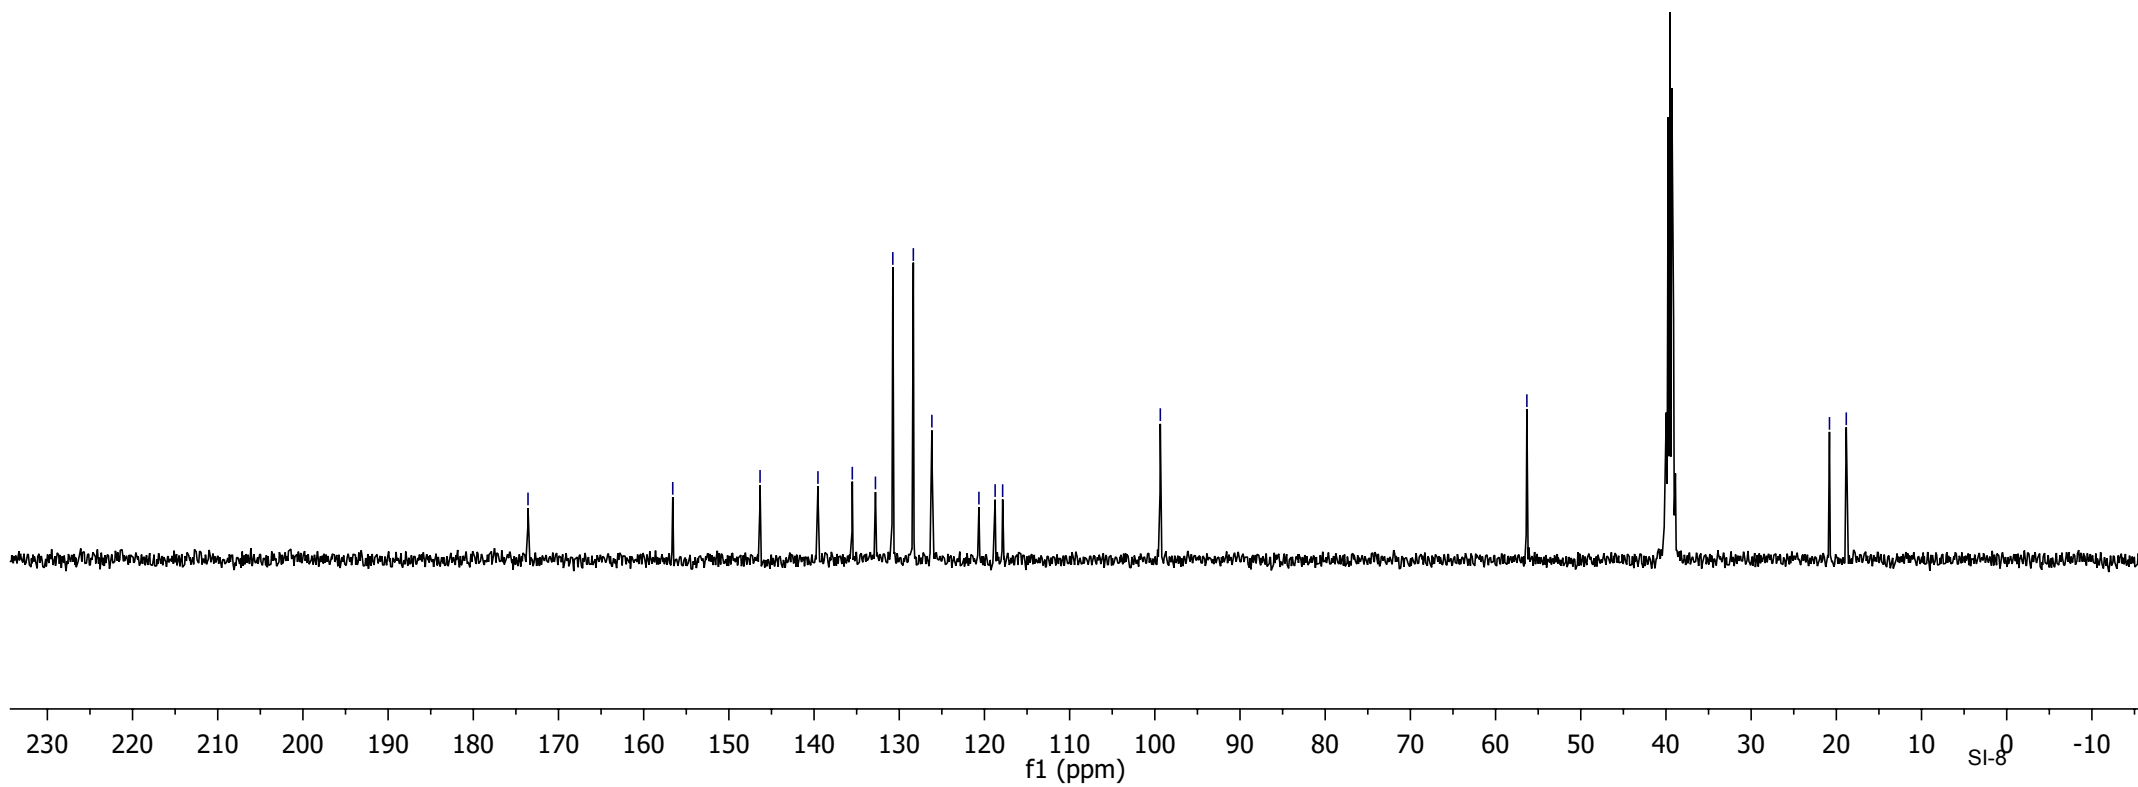

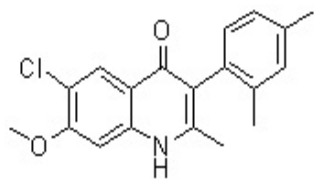

**14**  
<sup>1</sup>H, 400 MHz, DMSO

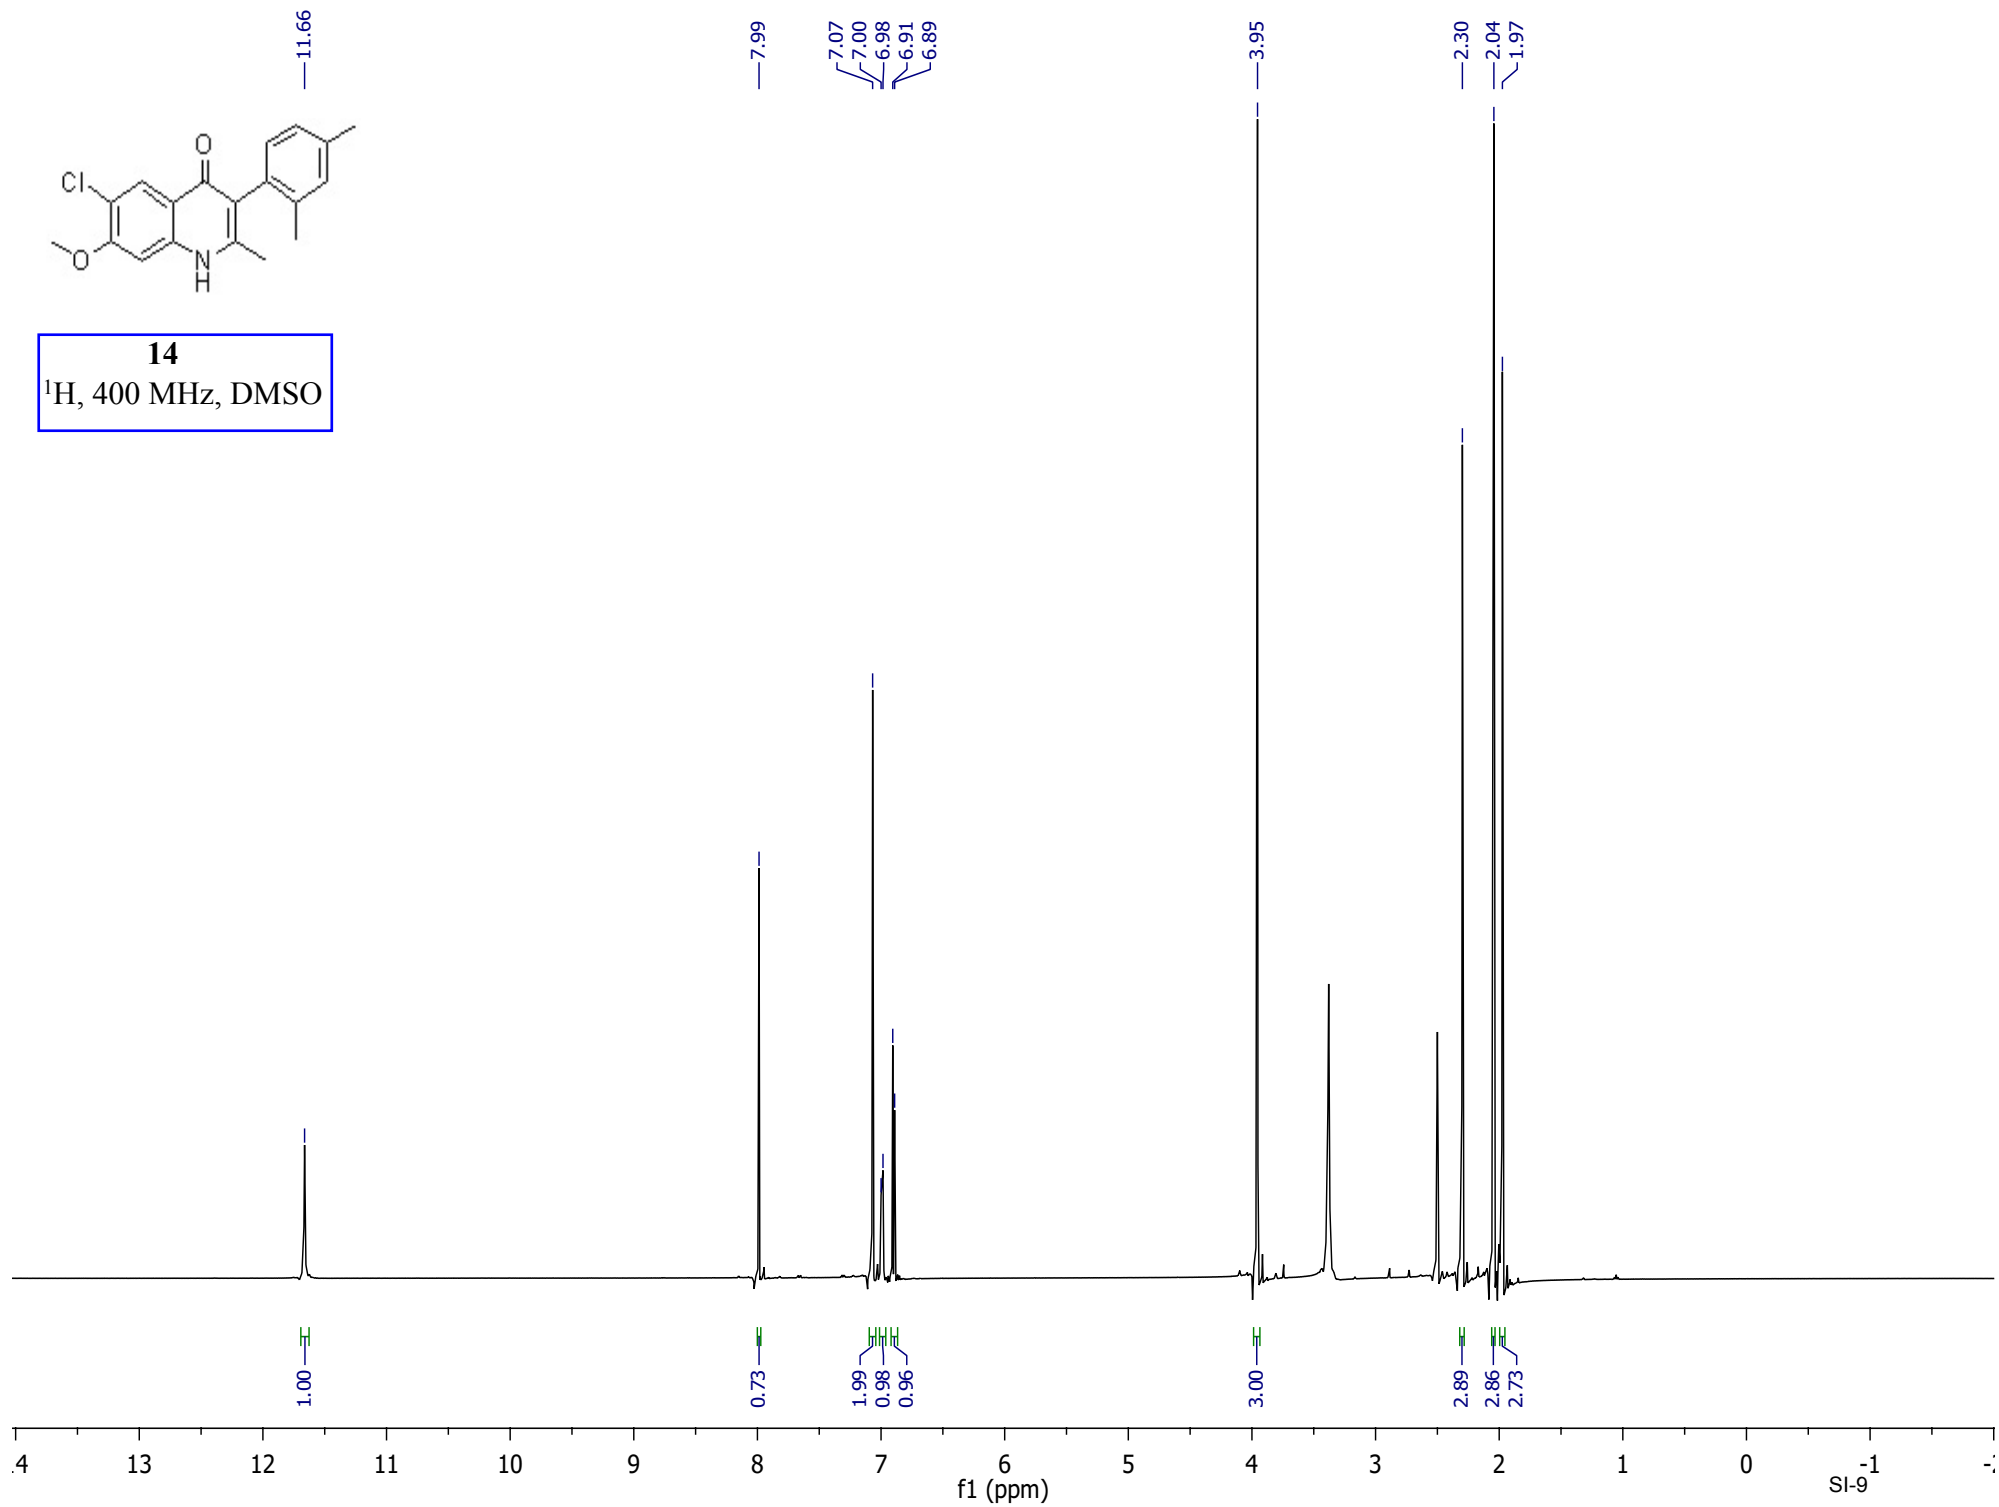

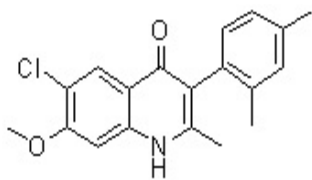

**14**  
 $^{13}\text{C}$ , 101 MHz, DMSO

—173.24  
—156.61  
—146.69  
—139.72  
—137.12  
—136.01  
—130.27  
—126.14  
—120.34  
—118.55  
—117.93  
—99.45  
—56.39  
—20.76  
—19.31  
—18.48

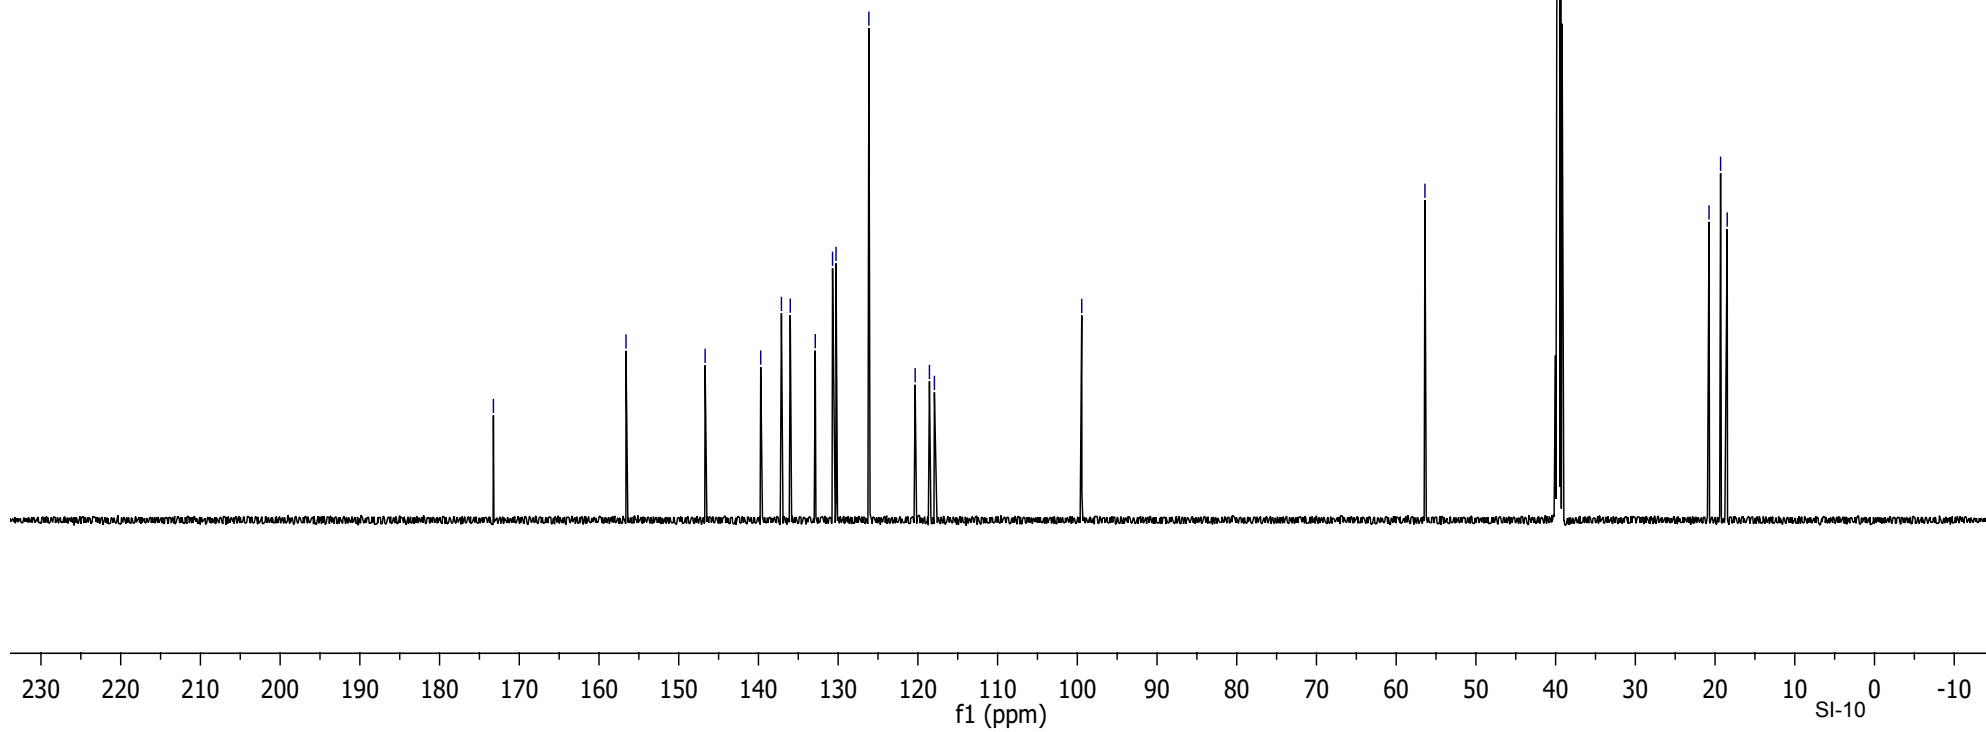

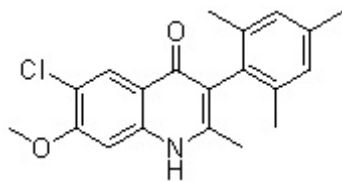

**15**  
<sup>1</sup>H, 250 MHz, DMSO

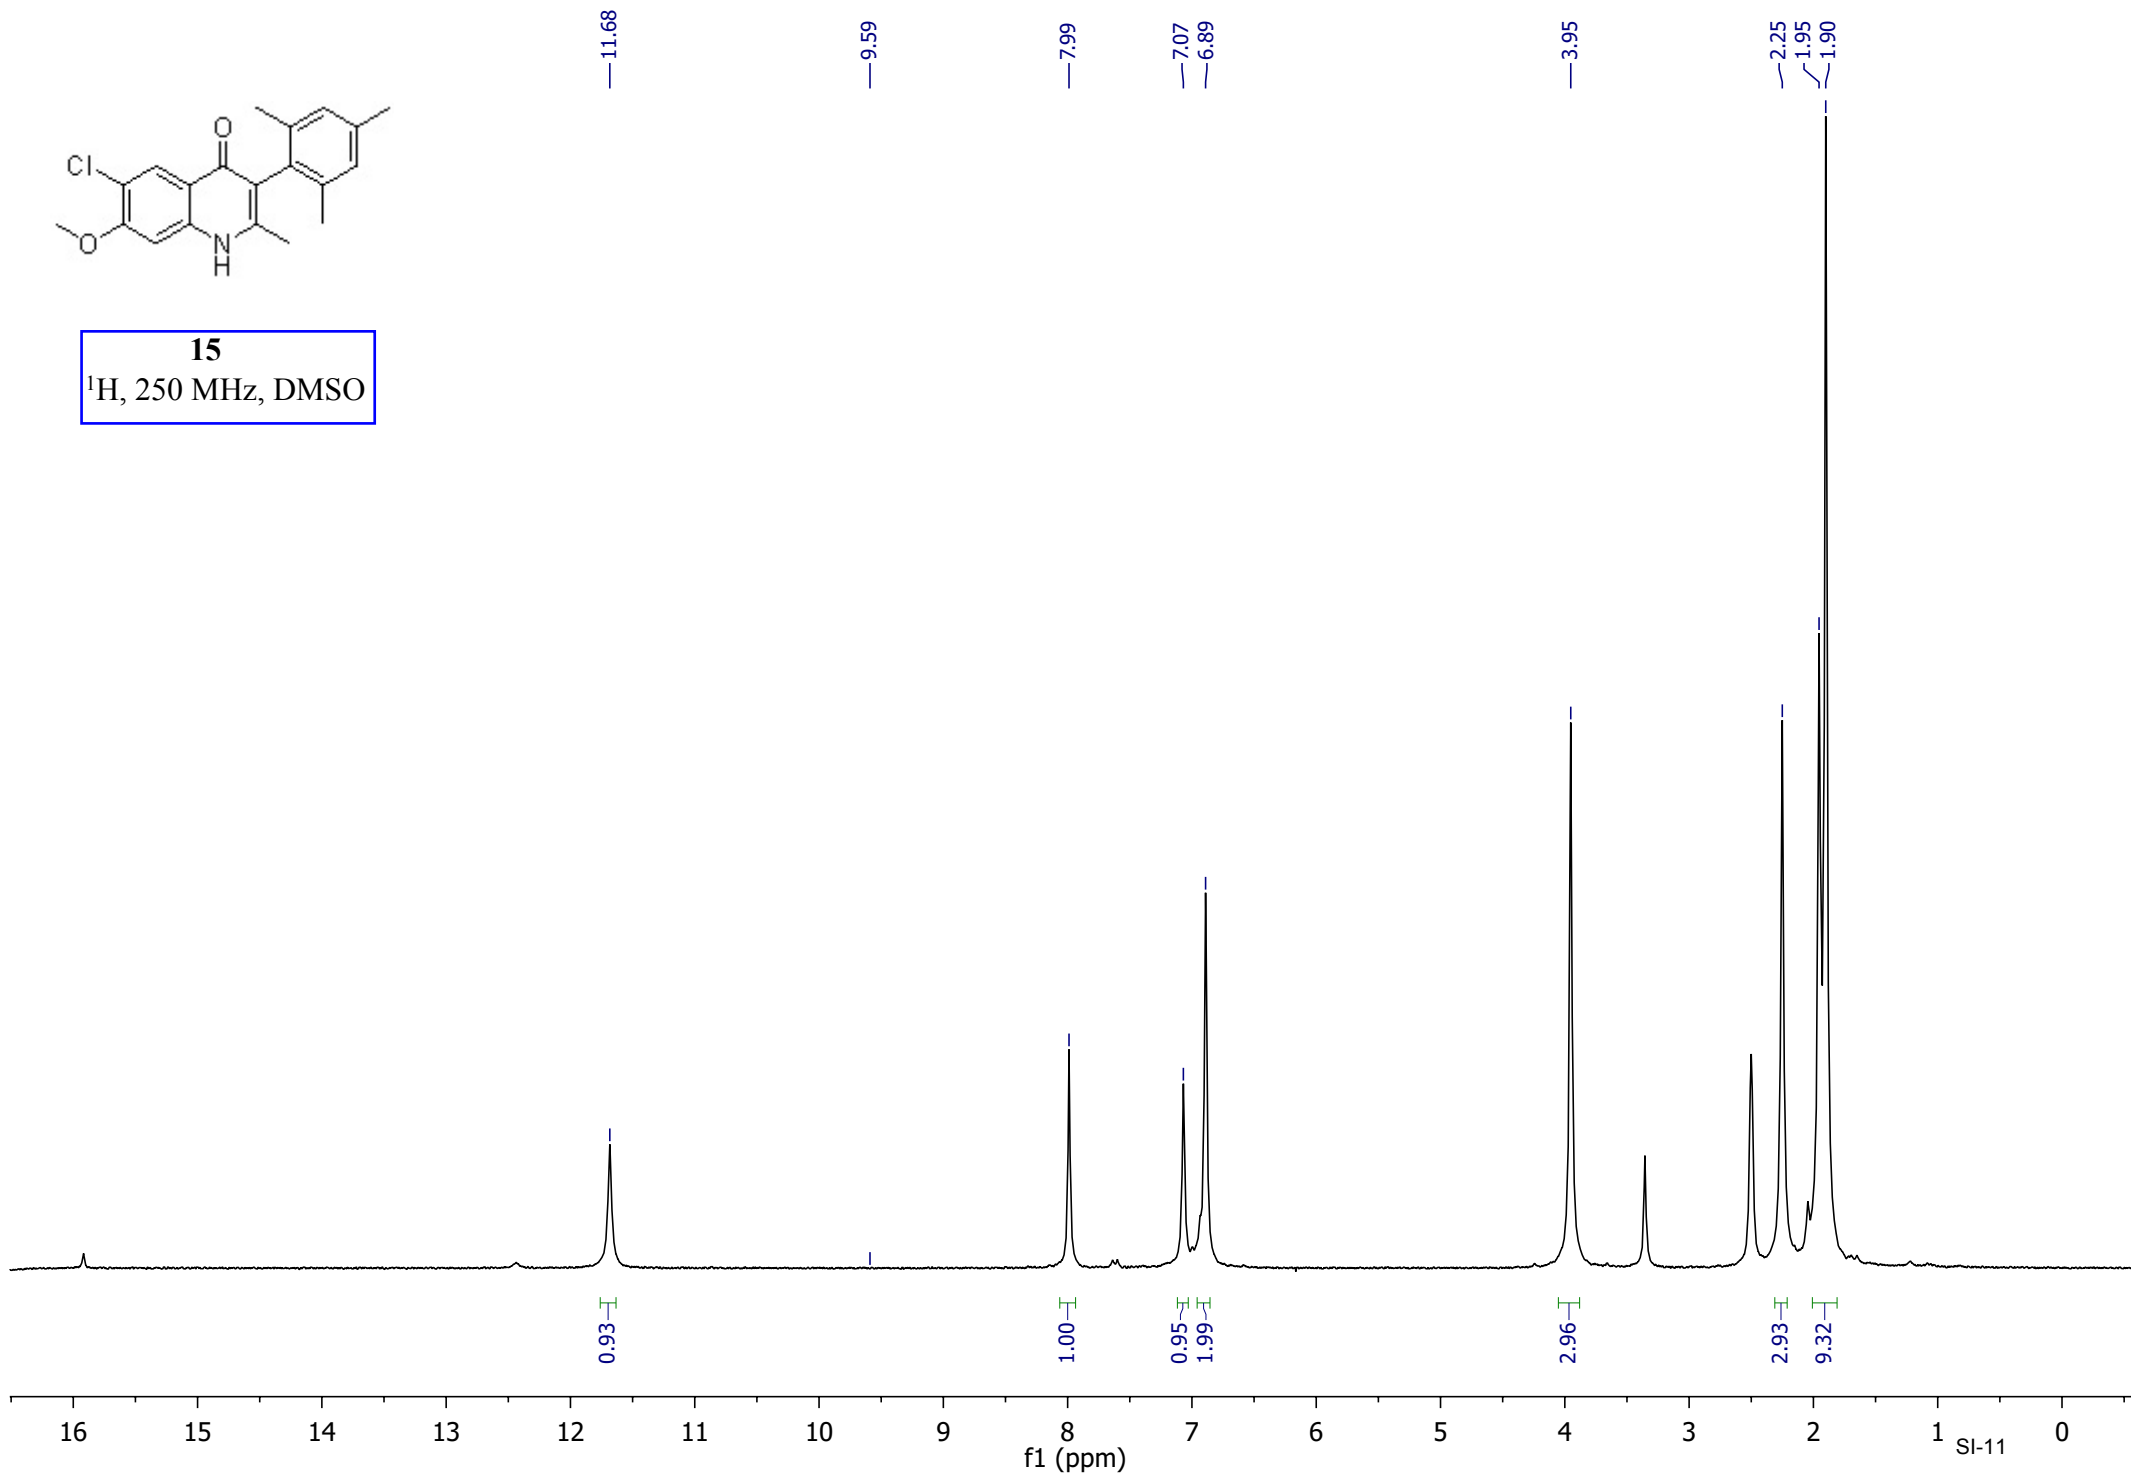

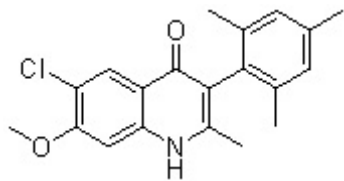

**15**

$^{13}\text{C}$ , 126 MHz, DMSO

—173.19

—156.60

—146.43

—139.85

—136.65

—135.64

—132.51

—127.82

—126.16

—118.81

—118.52

—117.83

—99.49

—56.39

—20.69

—19.66

—17.77

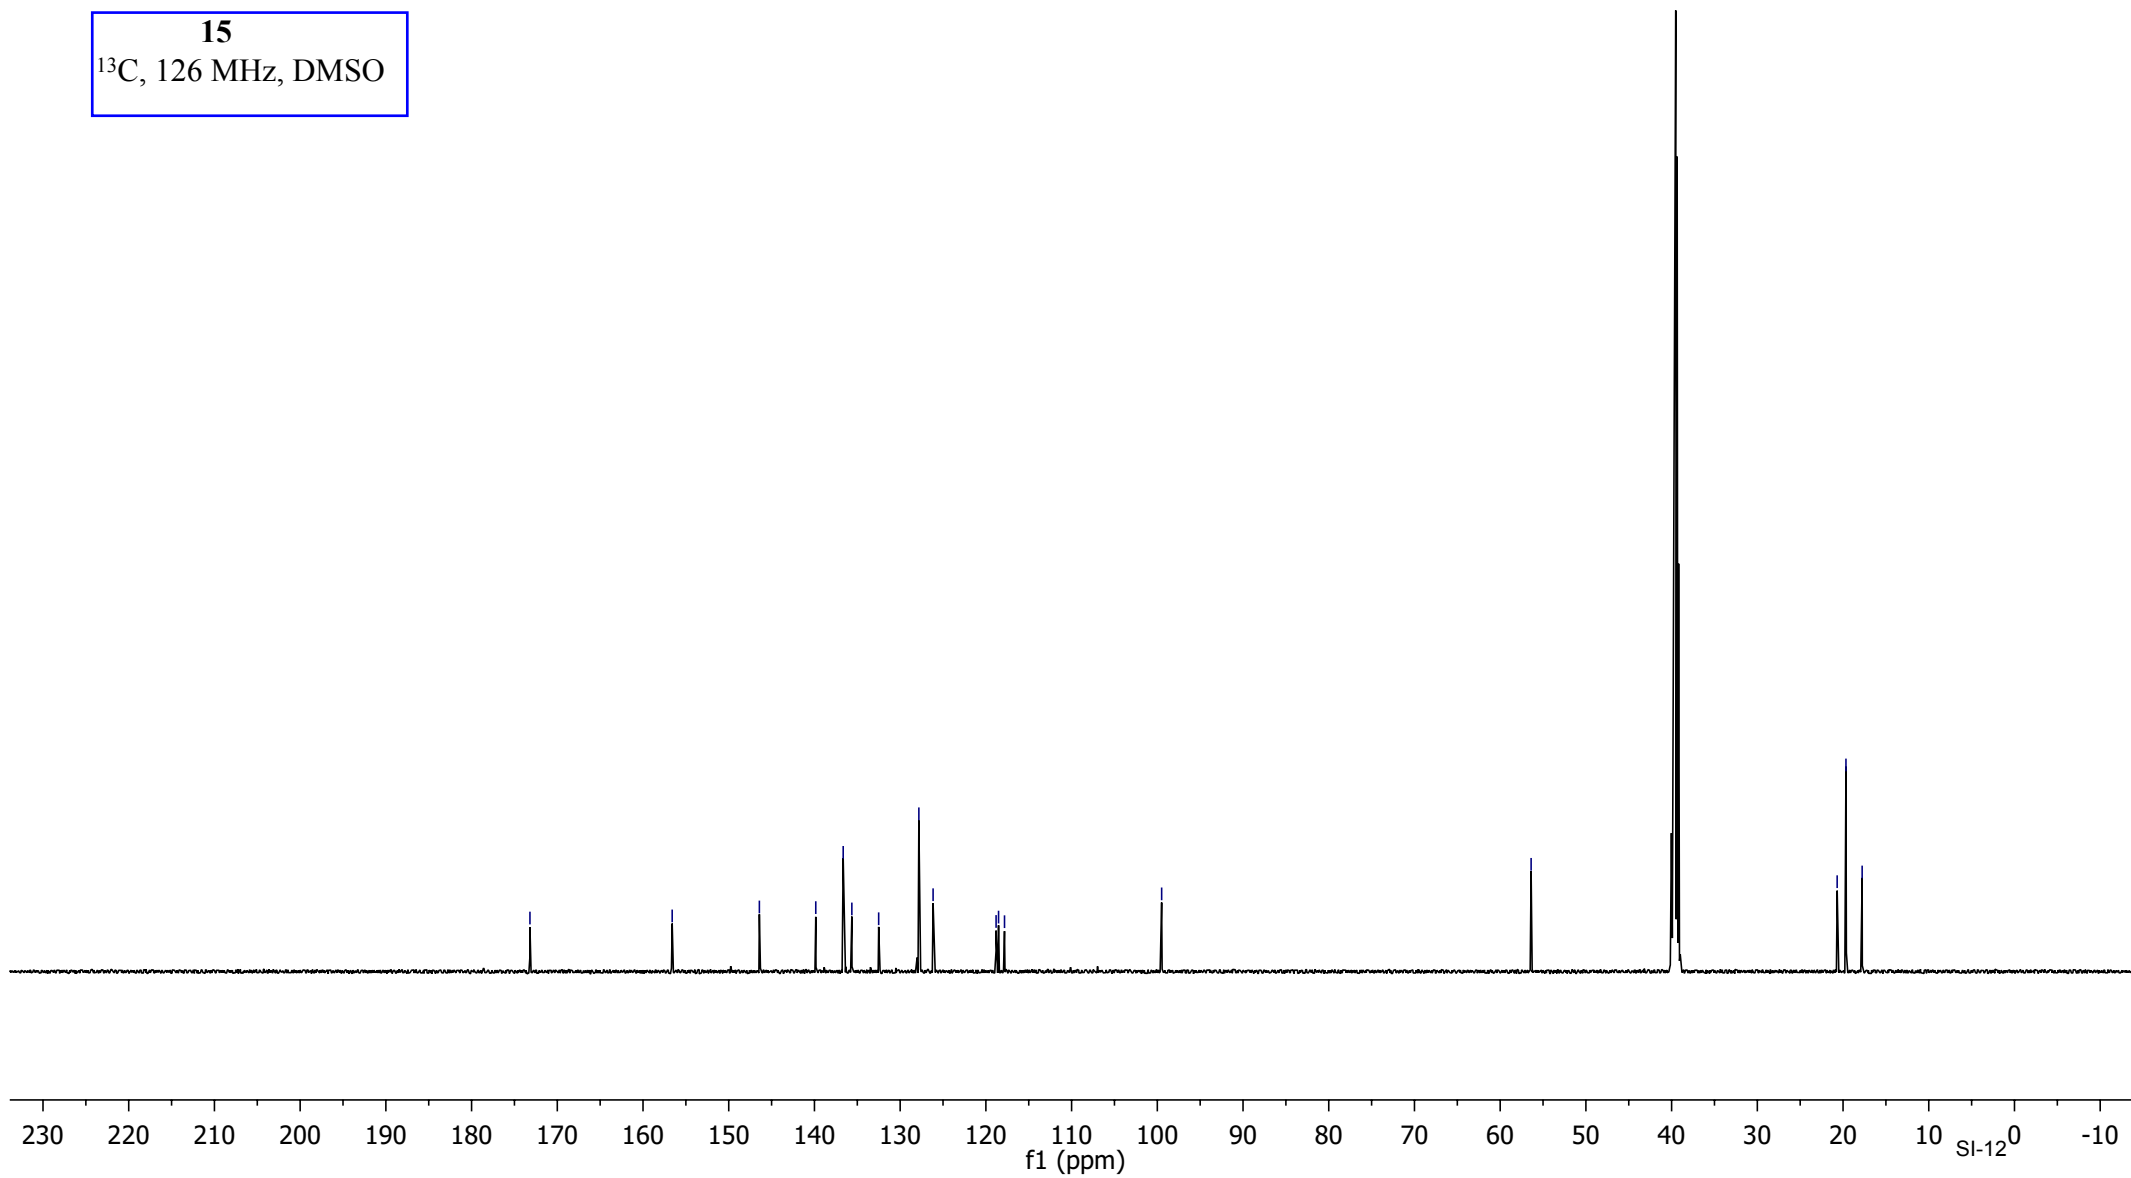

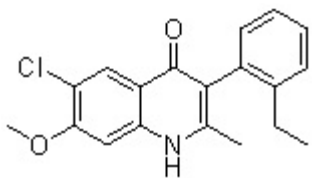

**16**  
<sup>1</sup>H, 400 MHz, DMSO

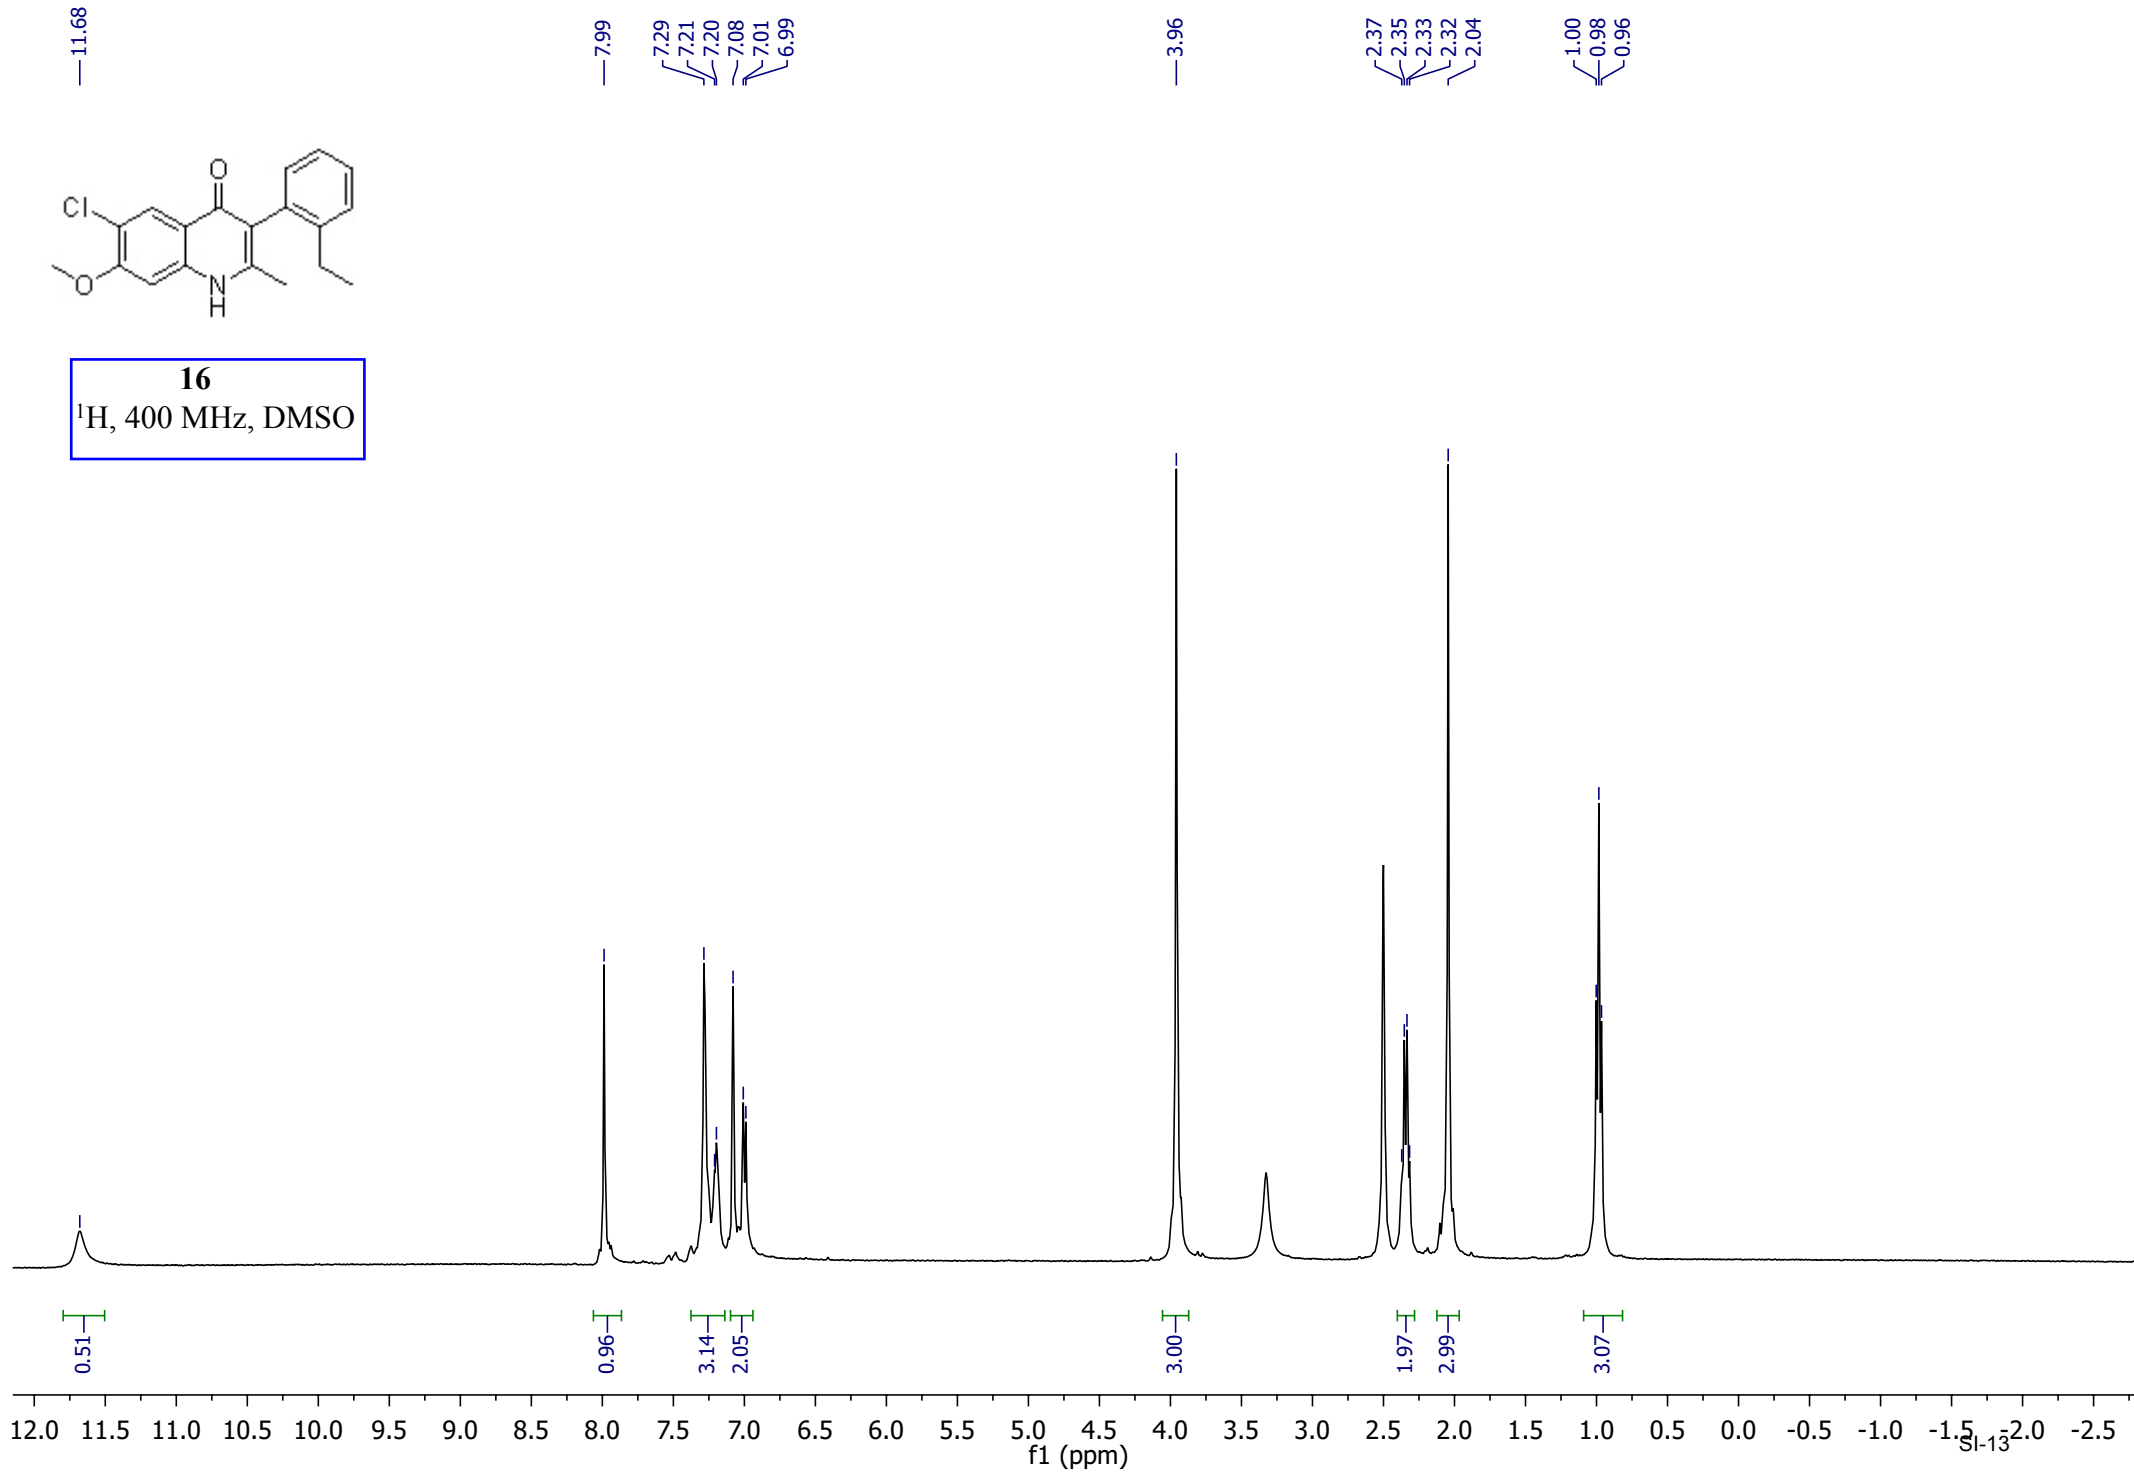

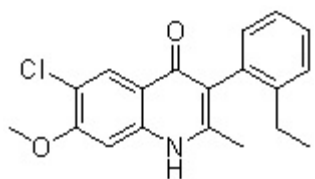

**16**

$^{13}\text{C}$ , 101 MHz, DMSO

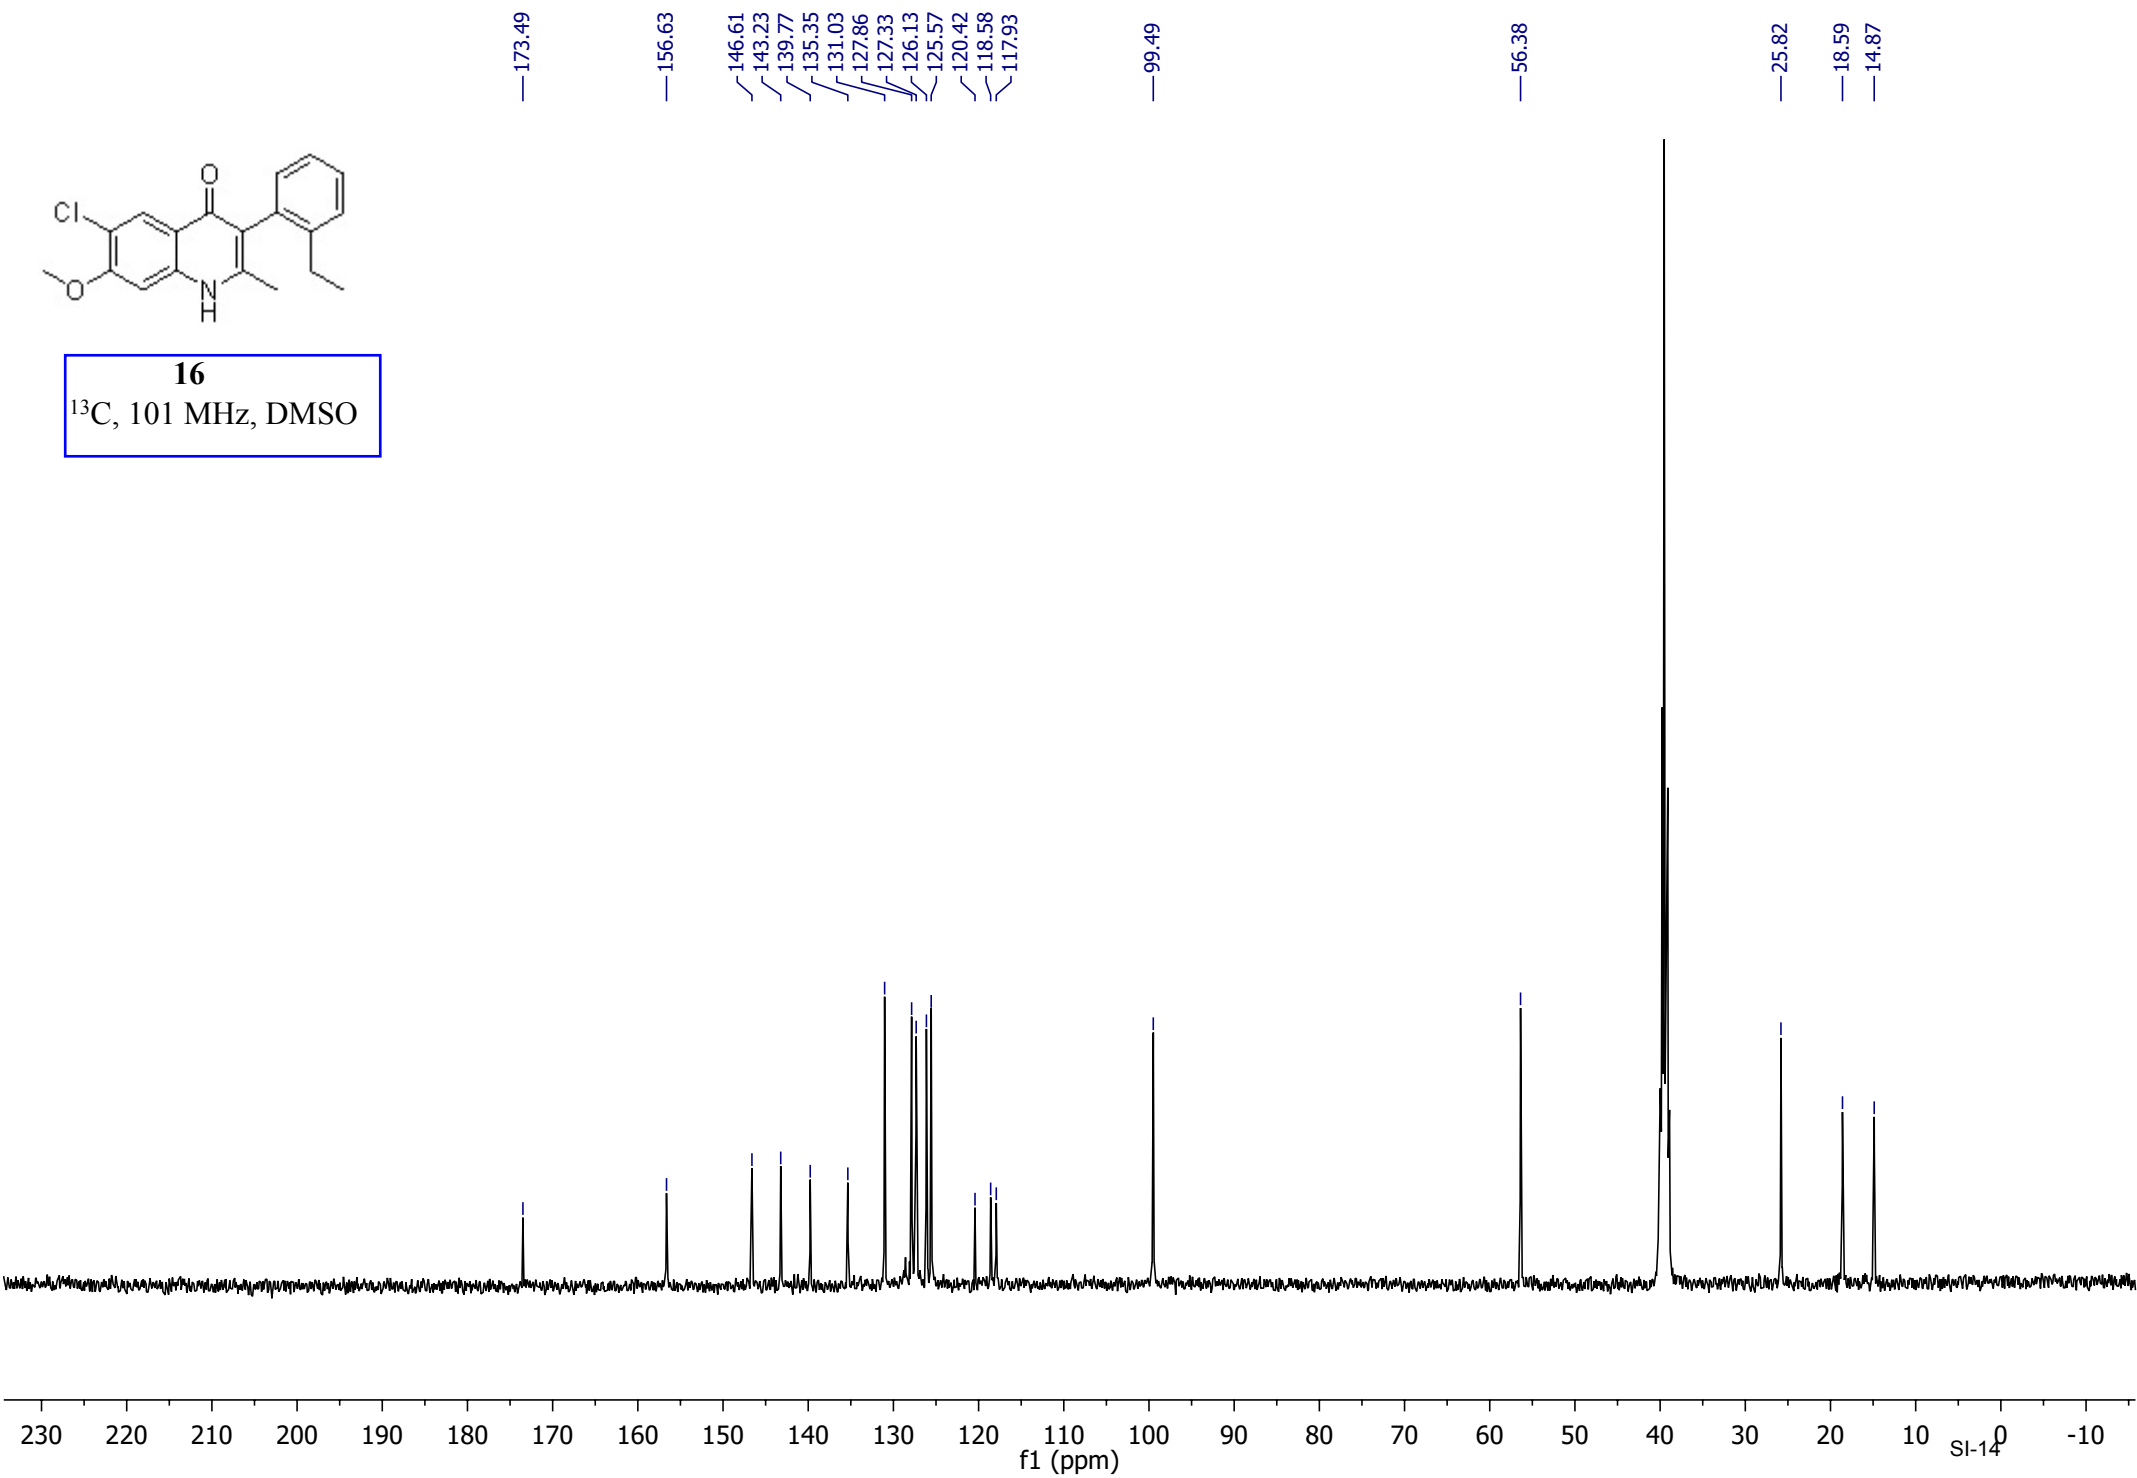

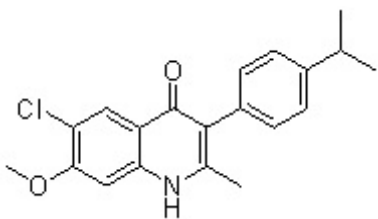

**17**  
<sup>1</sup>H, 400 MHz, DMSO

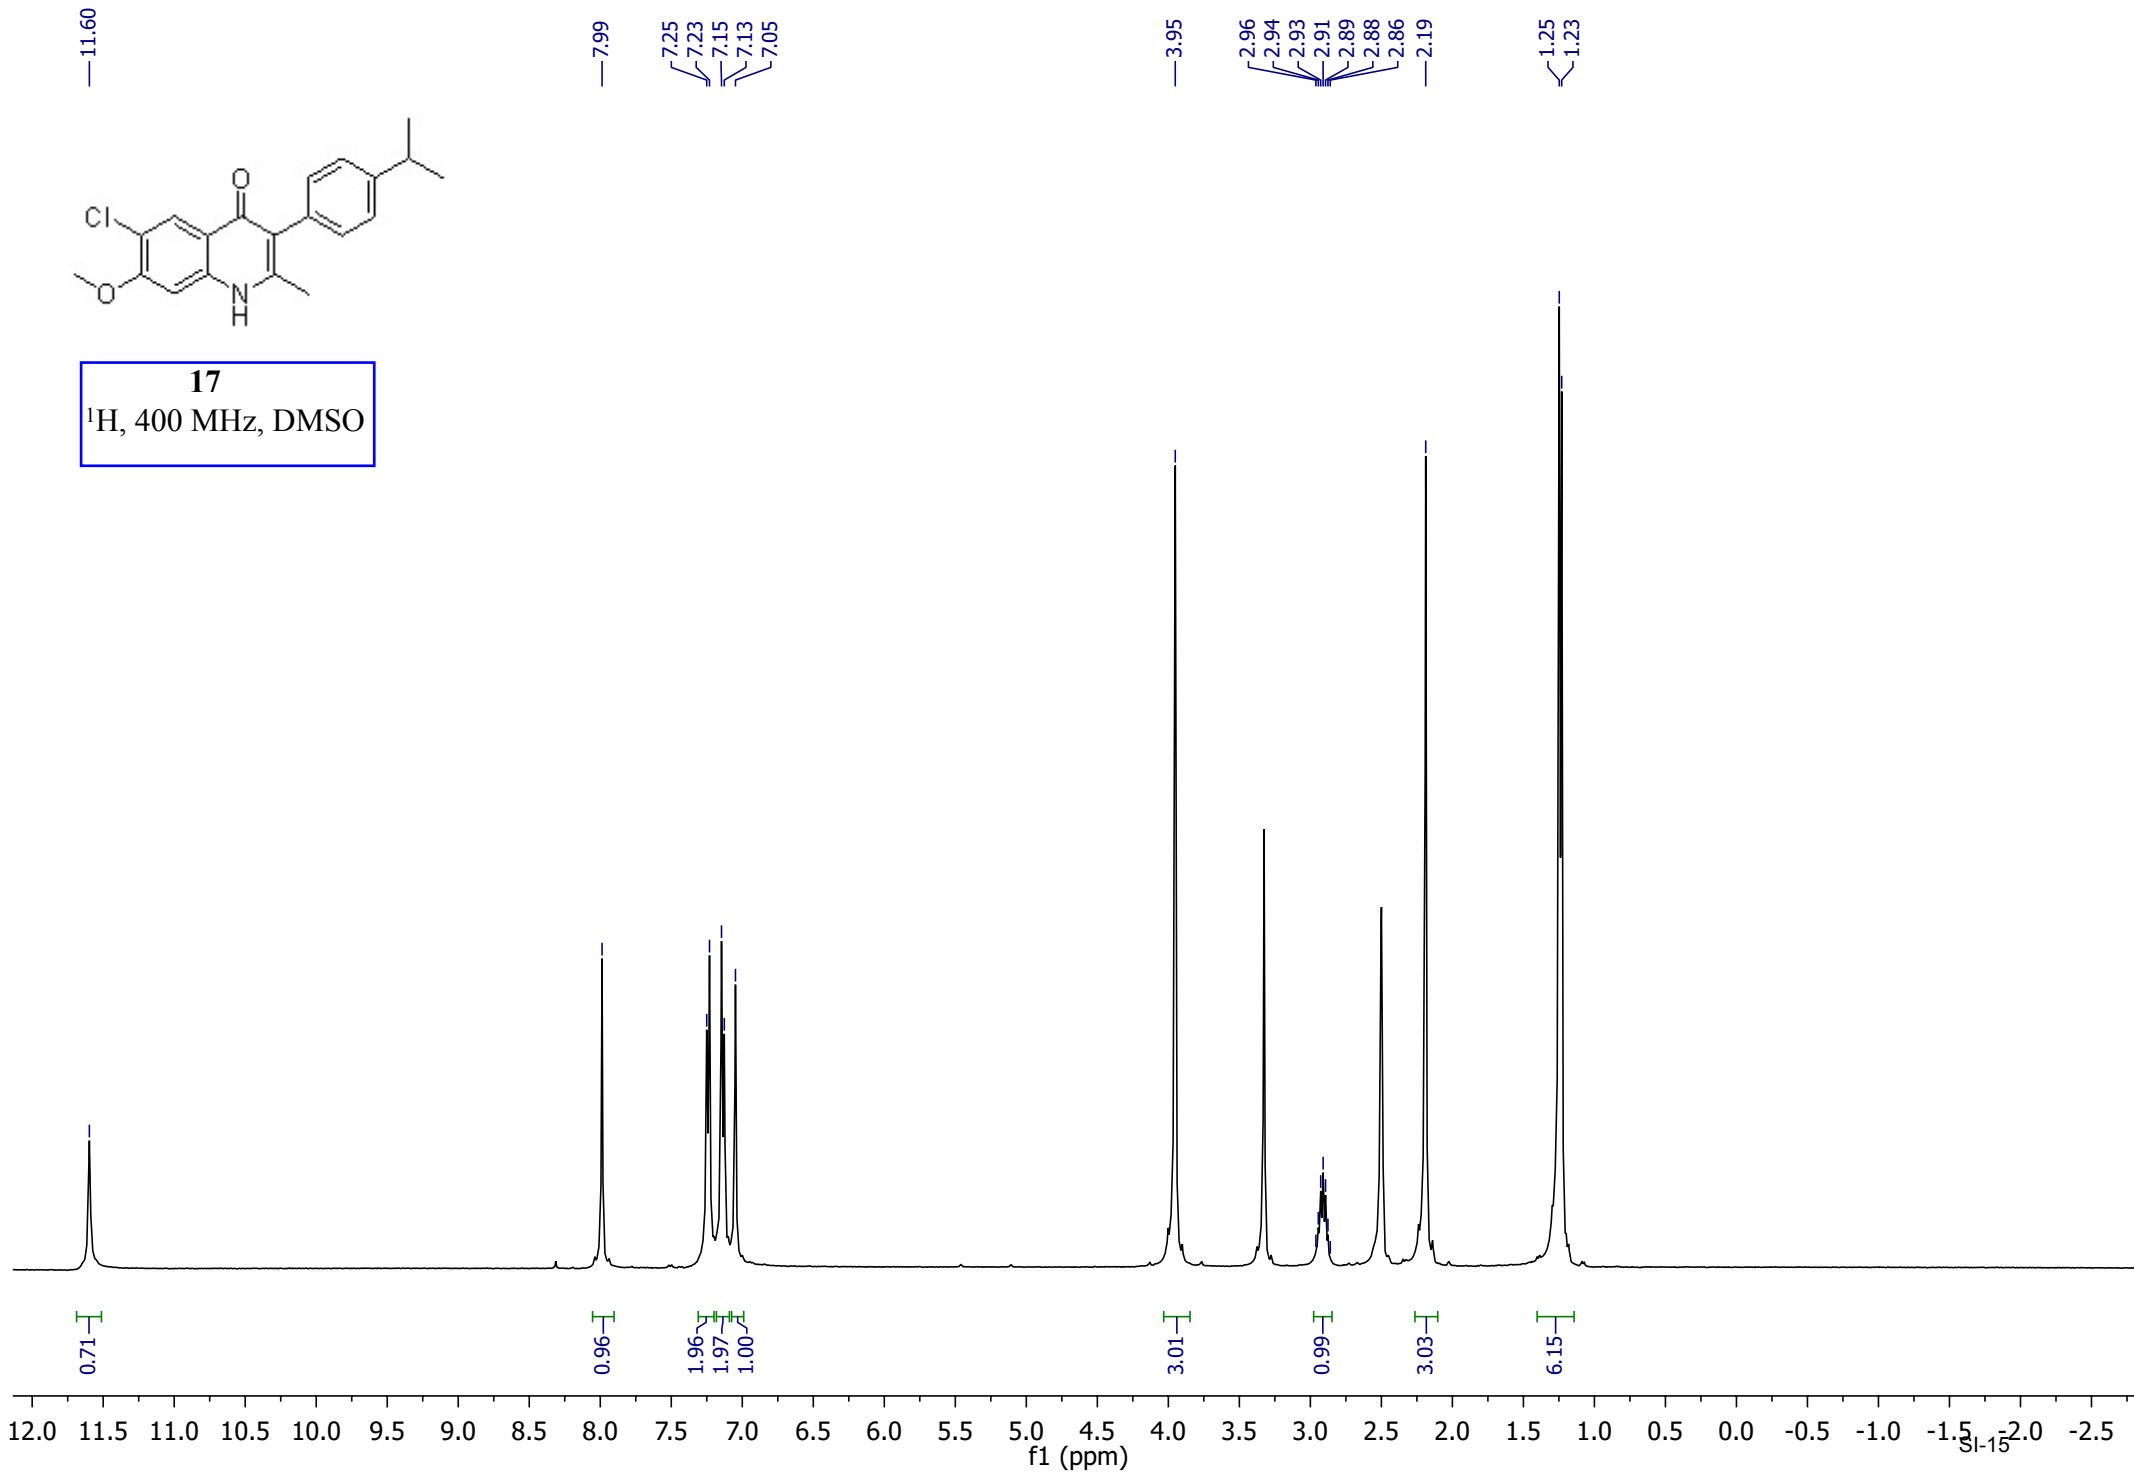



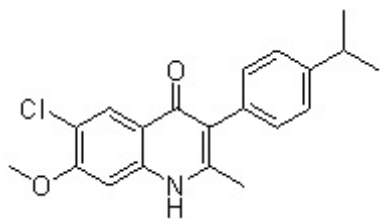

**17**

<sup>13</sup>C, 101 MHz, DMSO

—173.61 —164.25 —156.61 —146.41 —139.55 —133.17 —130.81 —126.17 —125.64 —120.66 —118.74 —117.87 —99.36 —56.35 —33.18 —23.92 —18.90

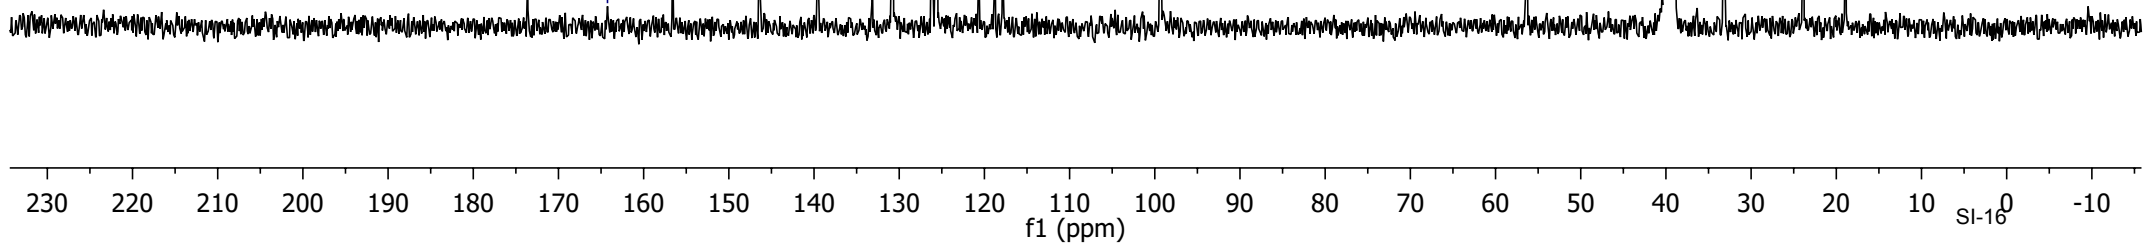

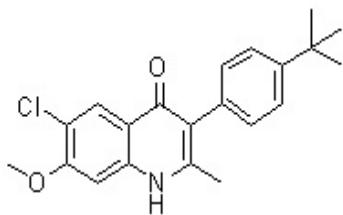

**18**  
<sup>1</sup>H, 400 MHz, DMSO

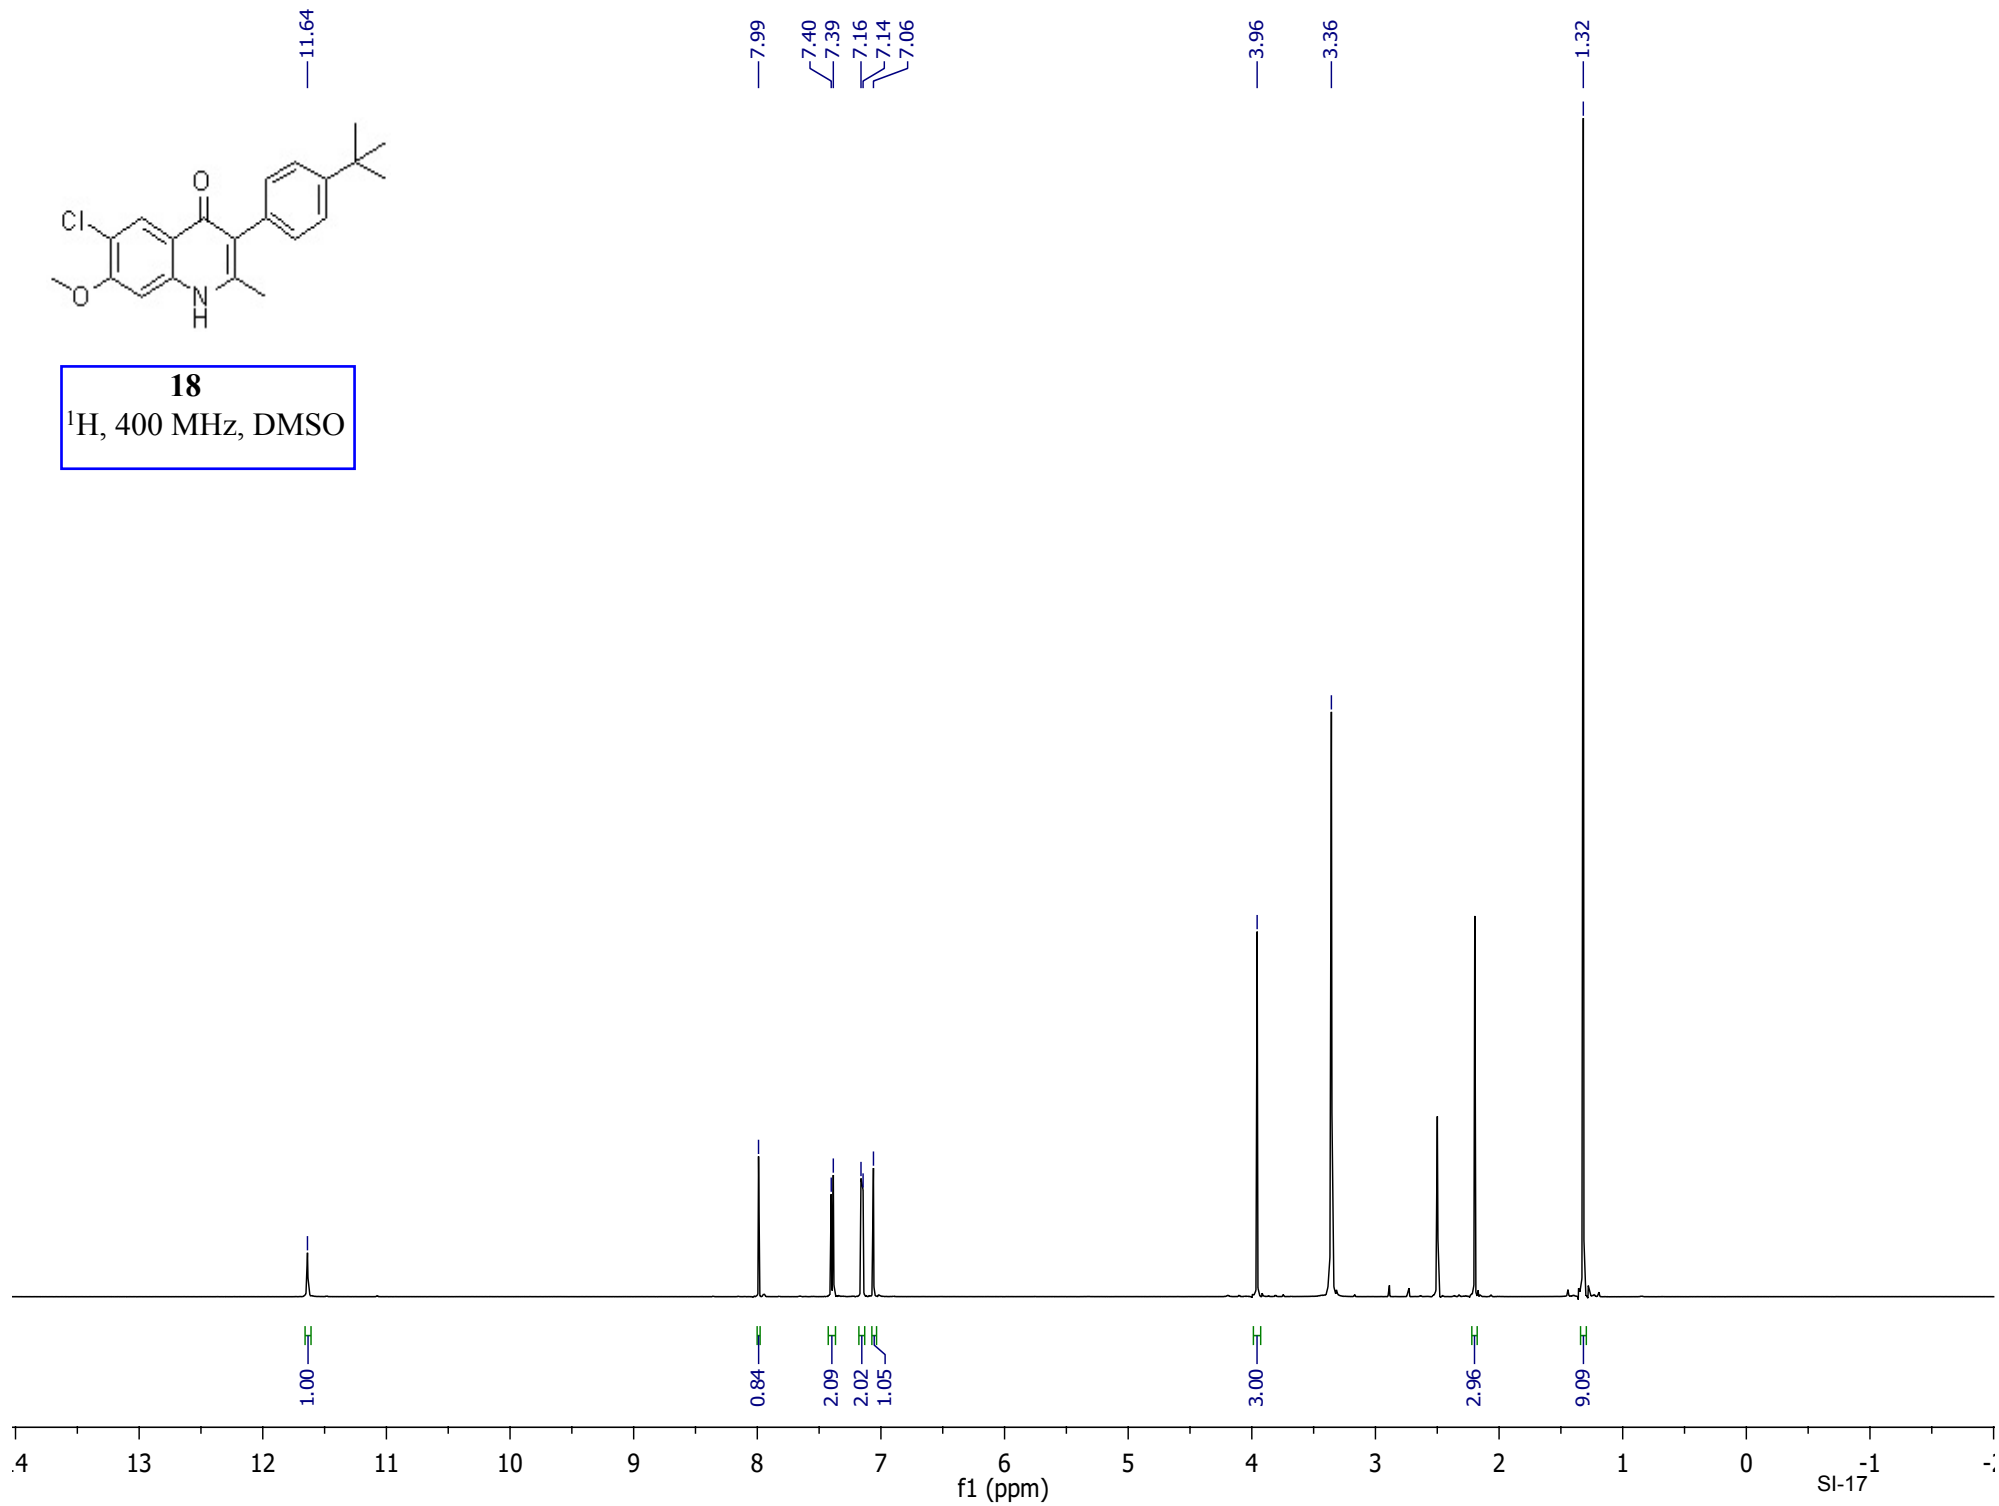



**18**

$^{13}\text{C}$ , 101 MHz, DMSO

—173.59  
—156.65  
—148.69  
—146.49  
—139.57  
—132.79  
—130.58  
—124.53  
—120.59  
—118.72  
—117.94  
—99.40  
—56.40  
—34.26  
—31.23  
—18.96

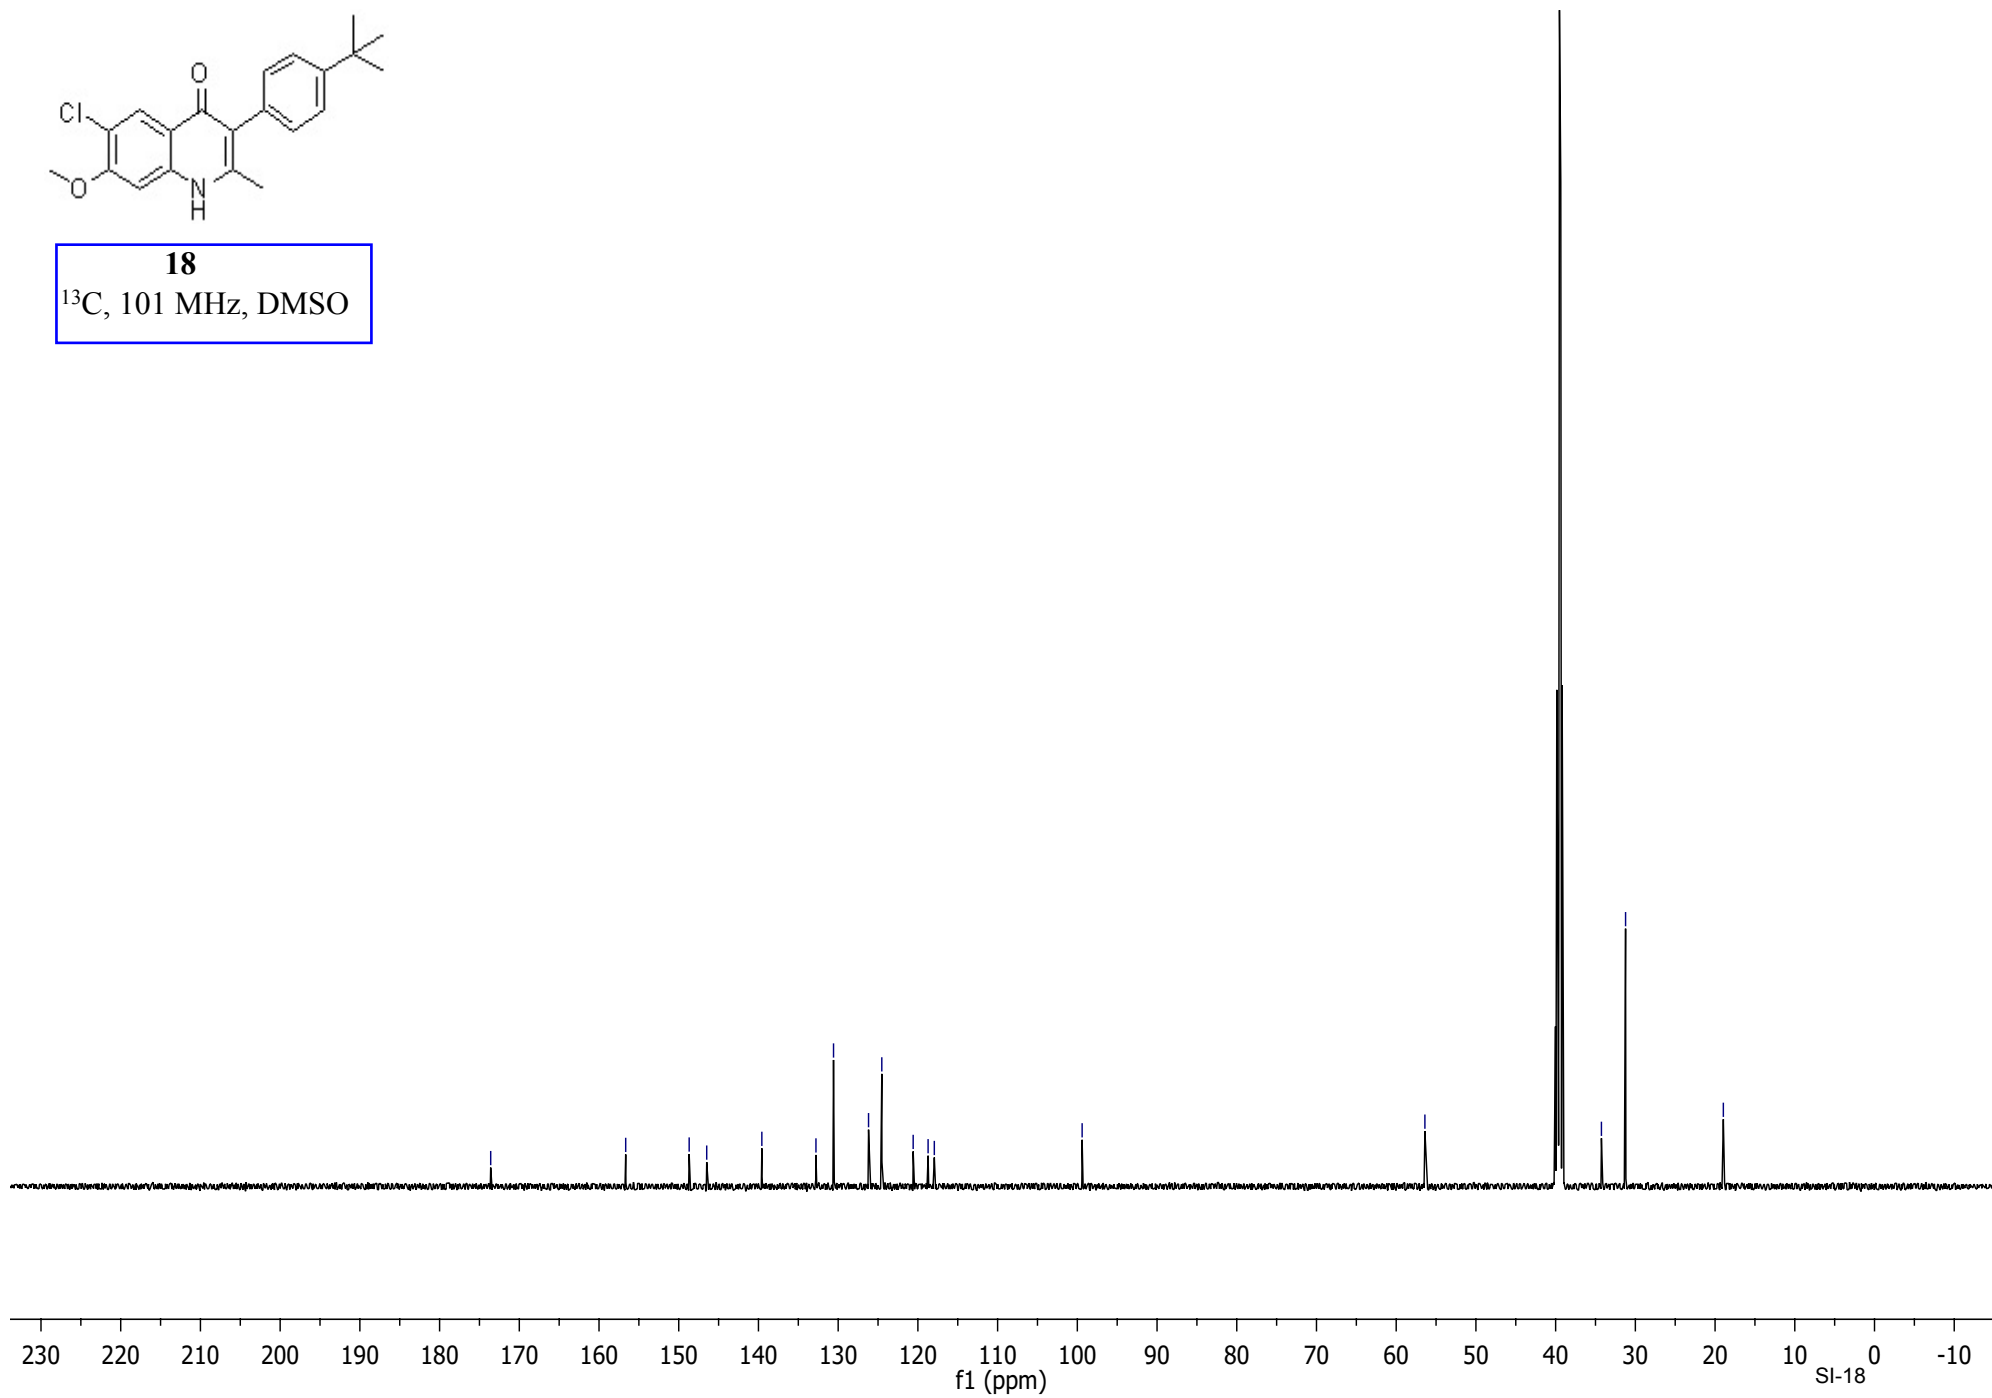

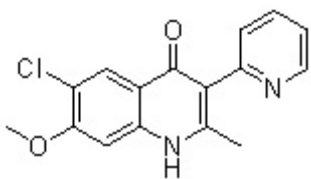

**19**  
<sup>1</sup>H, 400 MHz, DMSO

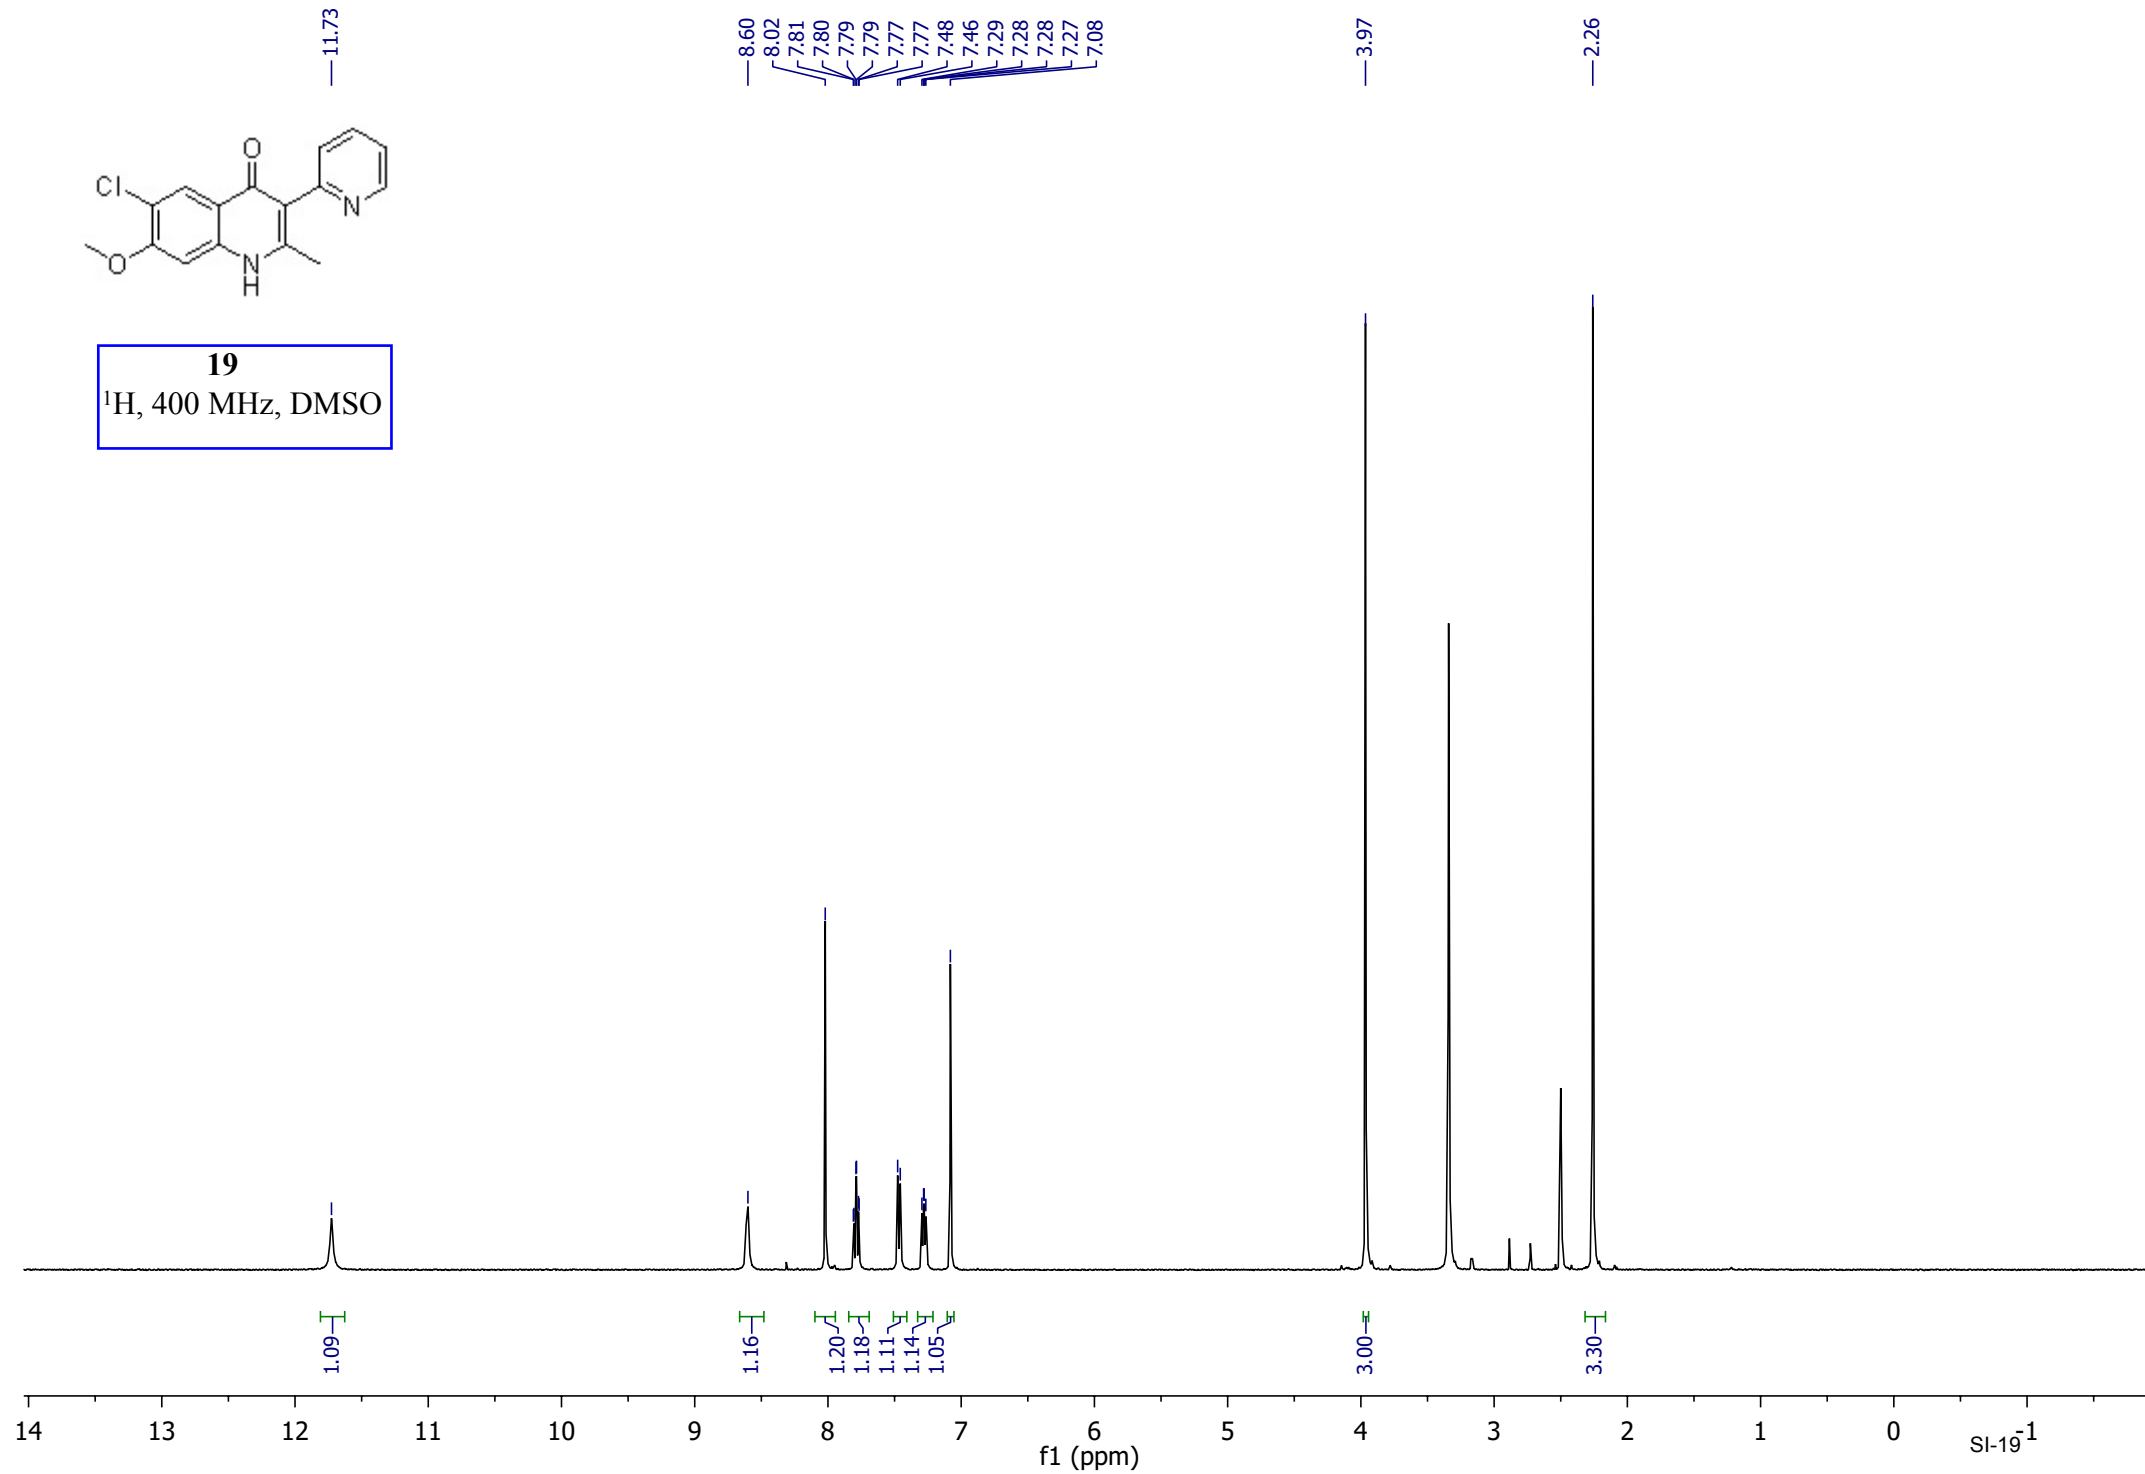



**19**

$^{13}\text{C}$ , 101 MHz, DMSO

— 173.30

— 156.78

— 155.00

— 148.65

— 148.10

— 139.53

— 135.44

— 126.84

— 126.10

— 121.59

— 120.09

— 119.06

— 118.24

— 99.60

— 56.39

— 18.59

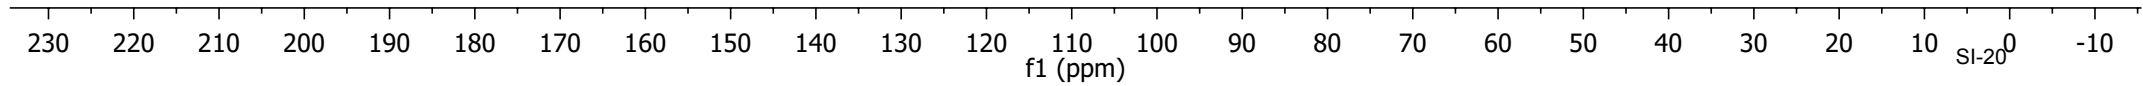

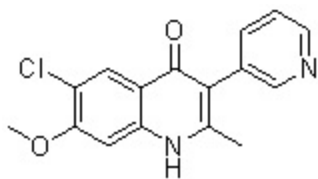

**20**

$^1\text{H}$ , 400 MHz, DMSO

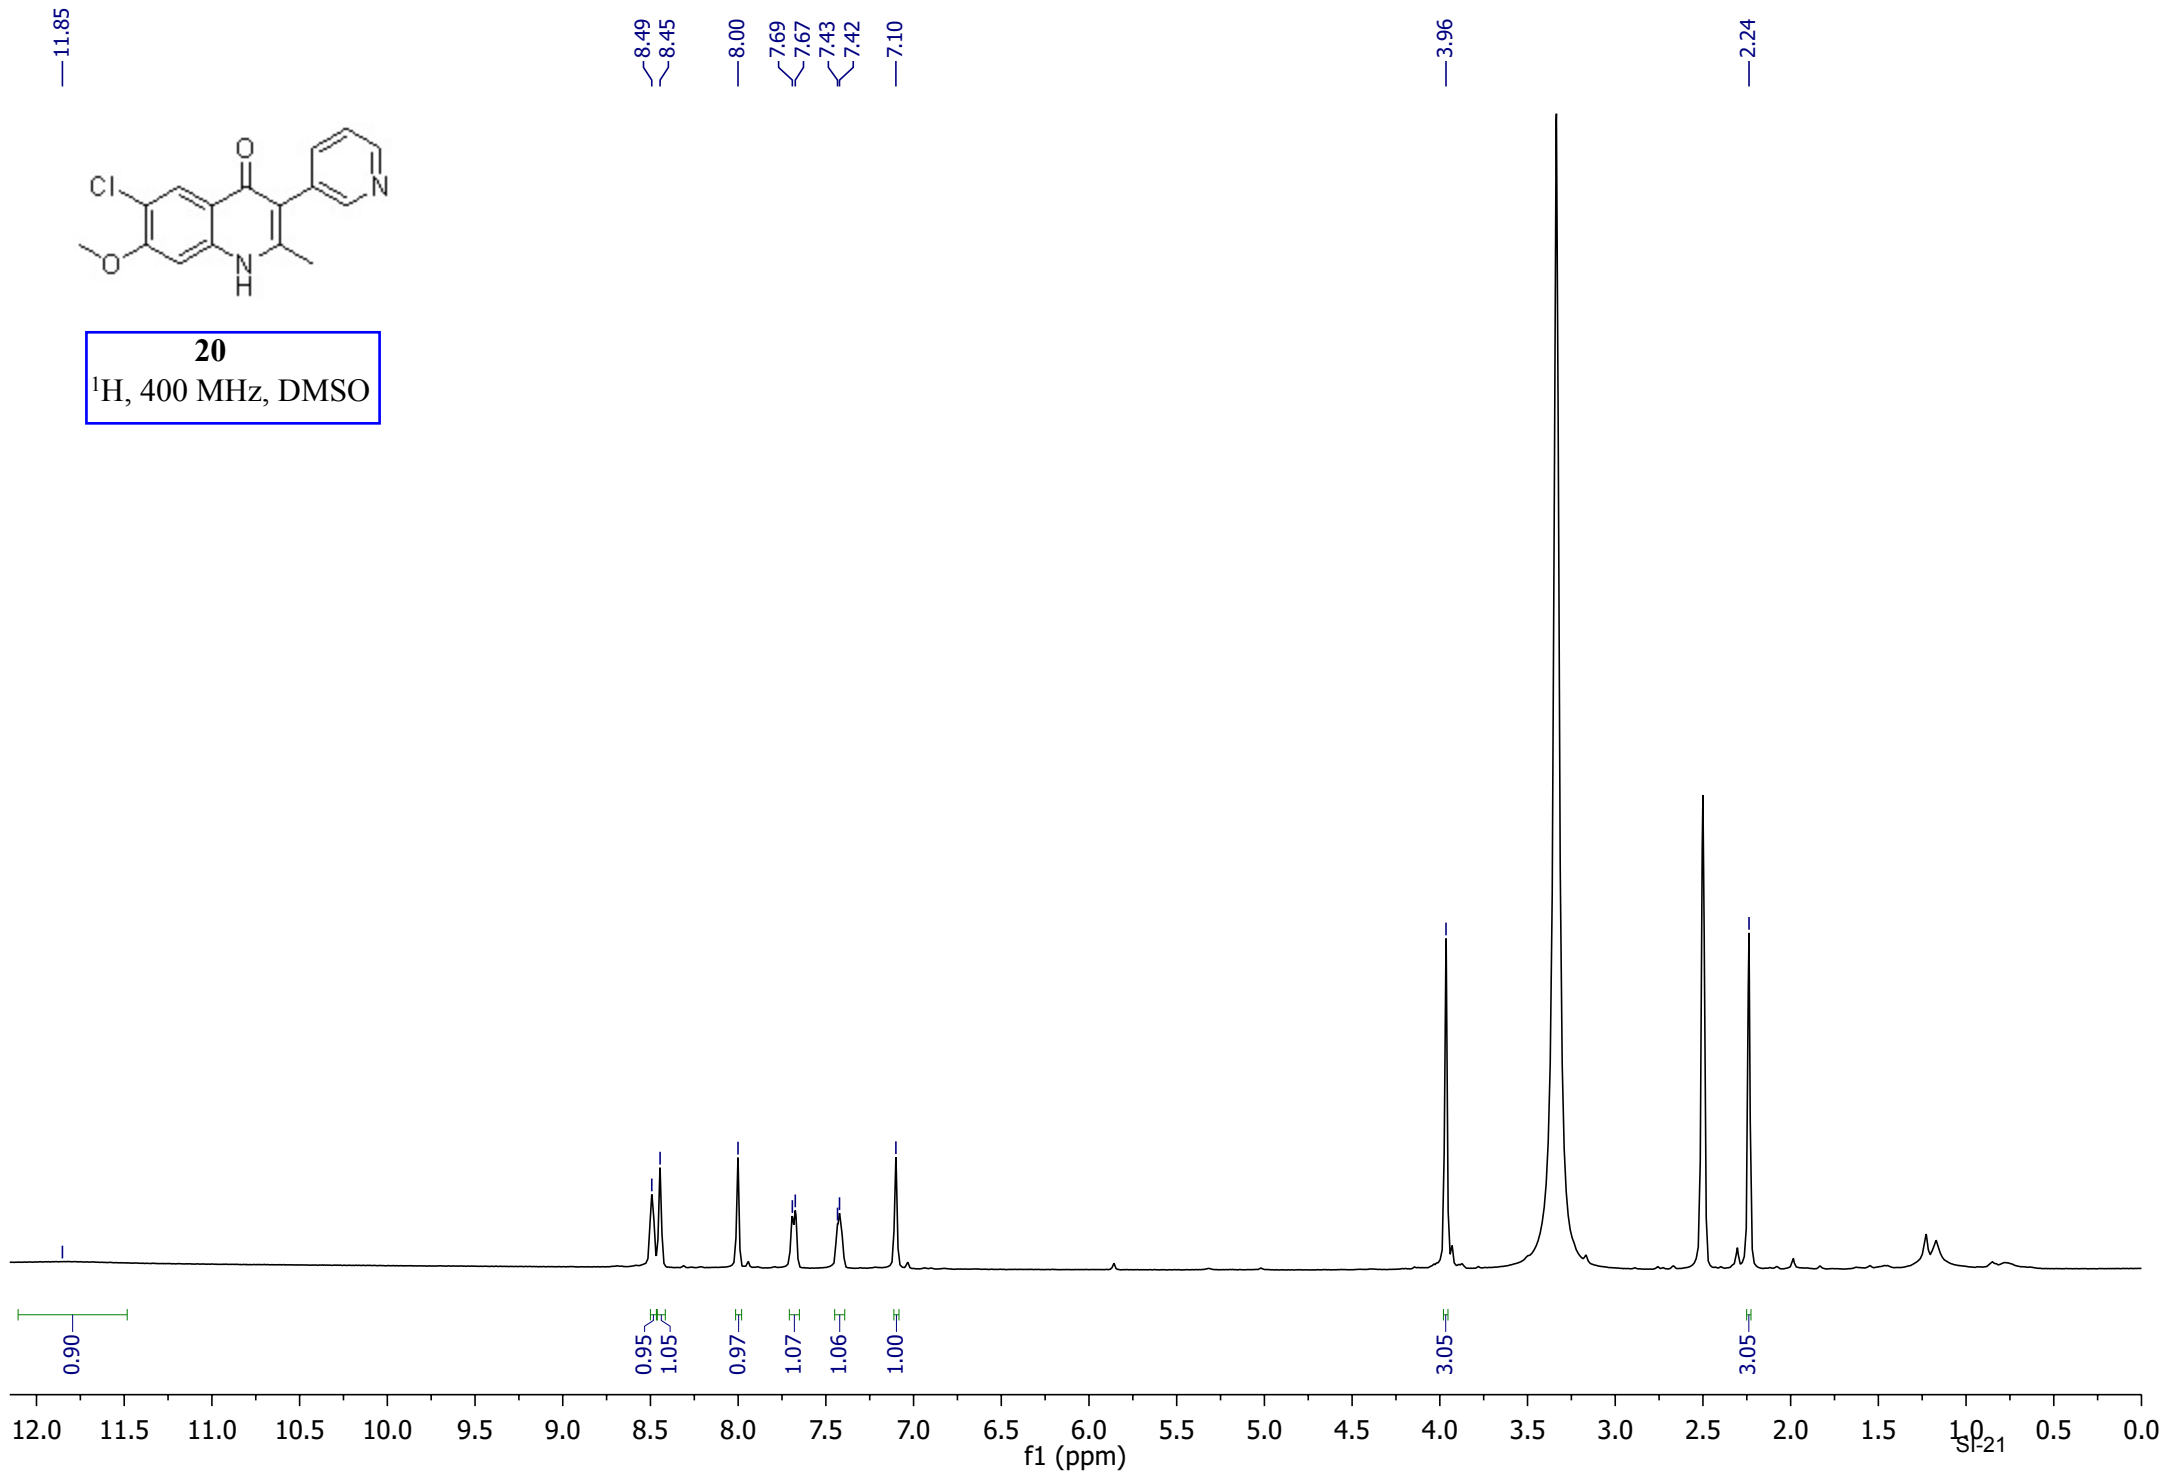



**20**

<sup>13</sup>C, 101 MHz, DMSO

— 173.40

— 156.83

— 151.34

— 147.48

— 147.24

— 139.72

— 138.44

— 131.58

— 126.10

— 122.96

— 118.62

— 118.23

— 117.24

— 99.60

— 56.42

— 18.85

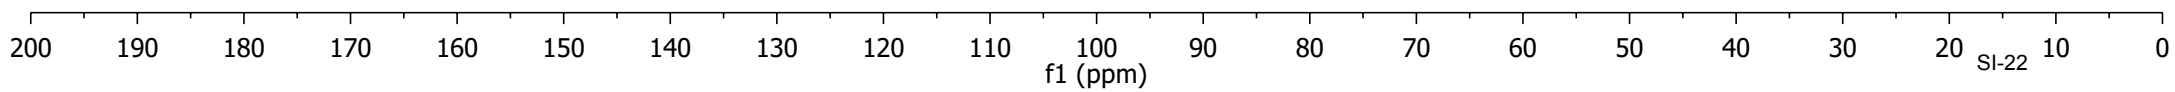

11.80

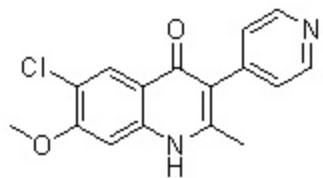

**21**  
<sup>1</sup>H, 400 MHz, DMSO

8.58  
8.57

8.00

7.31  
7.30  
7.29  
7.07

3.96

2.25

0.85

2.04

0.75

2.12

1.00

3.21

2.96

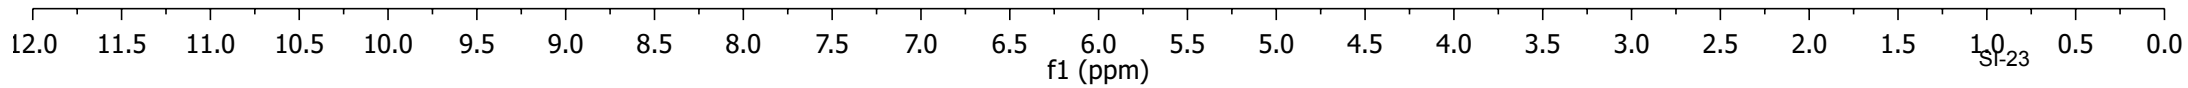

SF-23



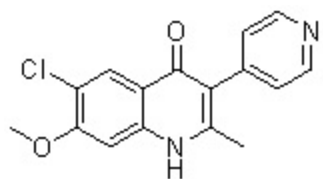

**21**  
<sup>13</sup>C, 101 MHz, DMSO

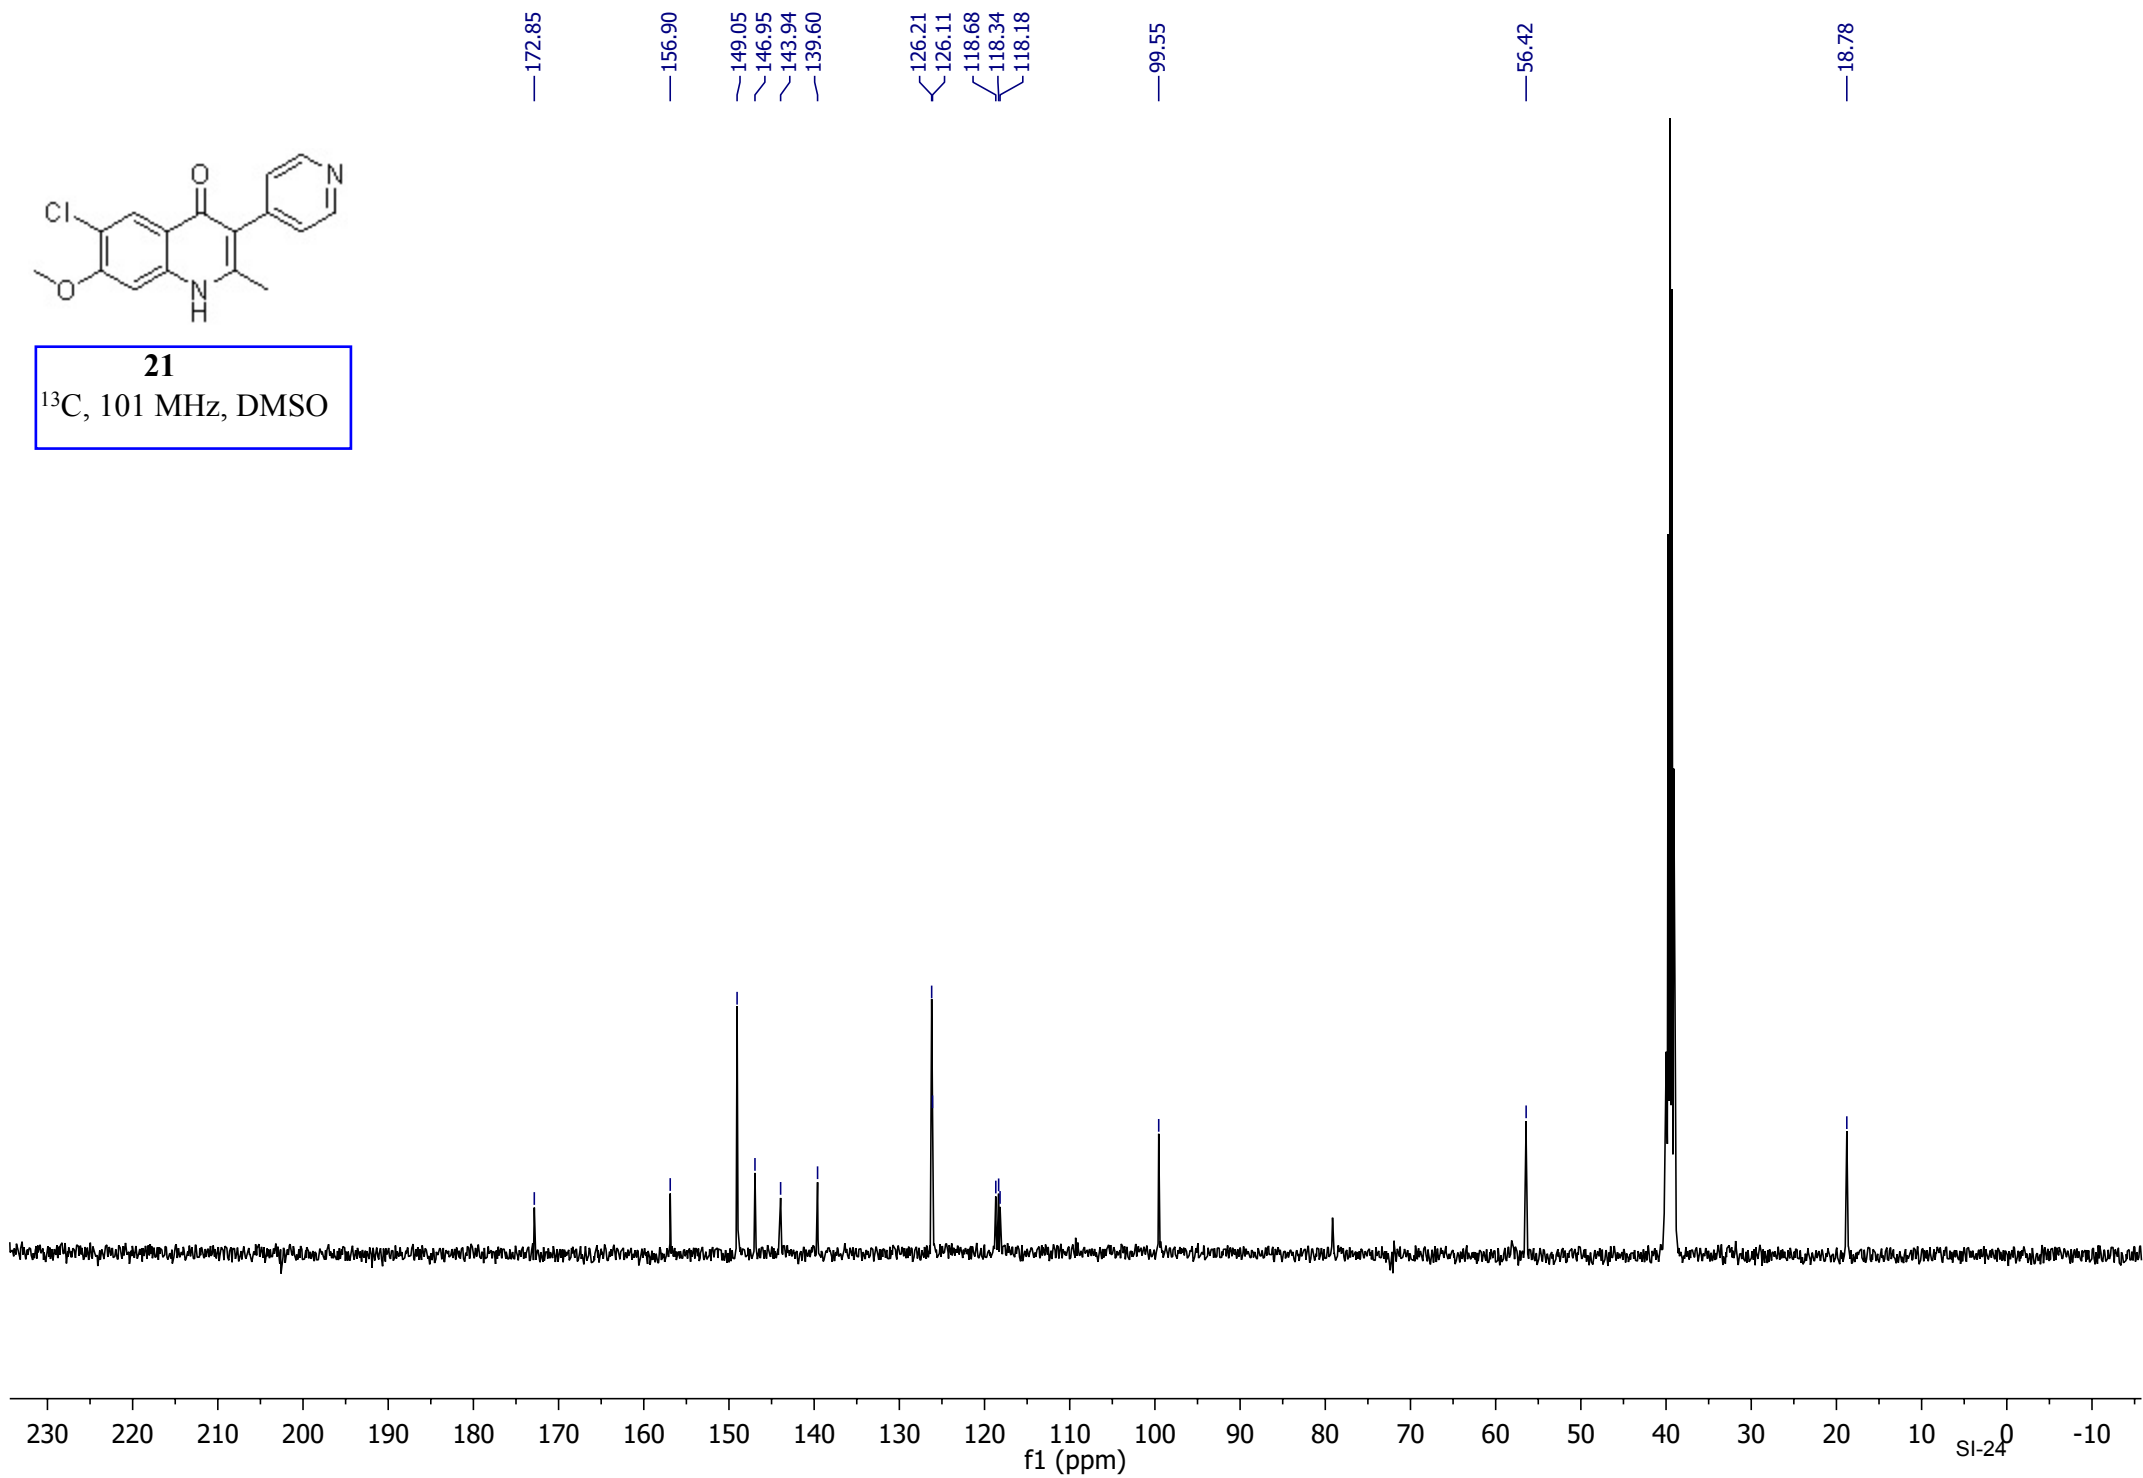

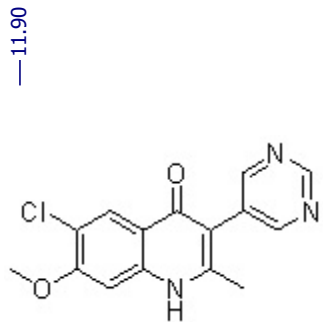

**22**  
<sup>1</sup>H, 400 MHz, DMSO

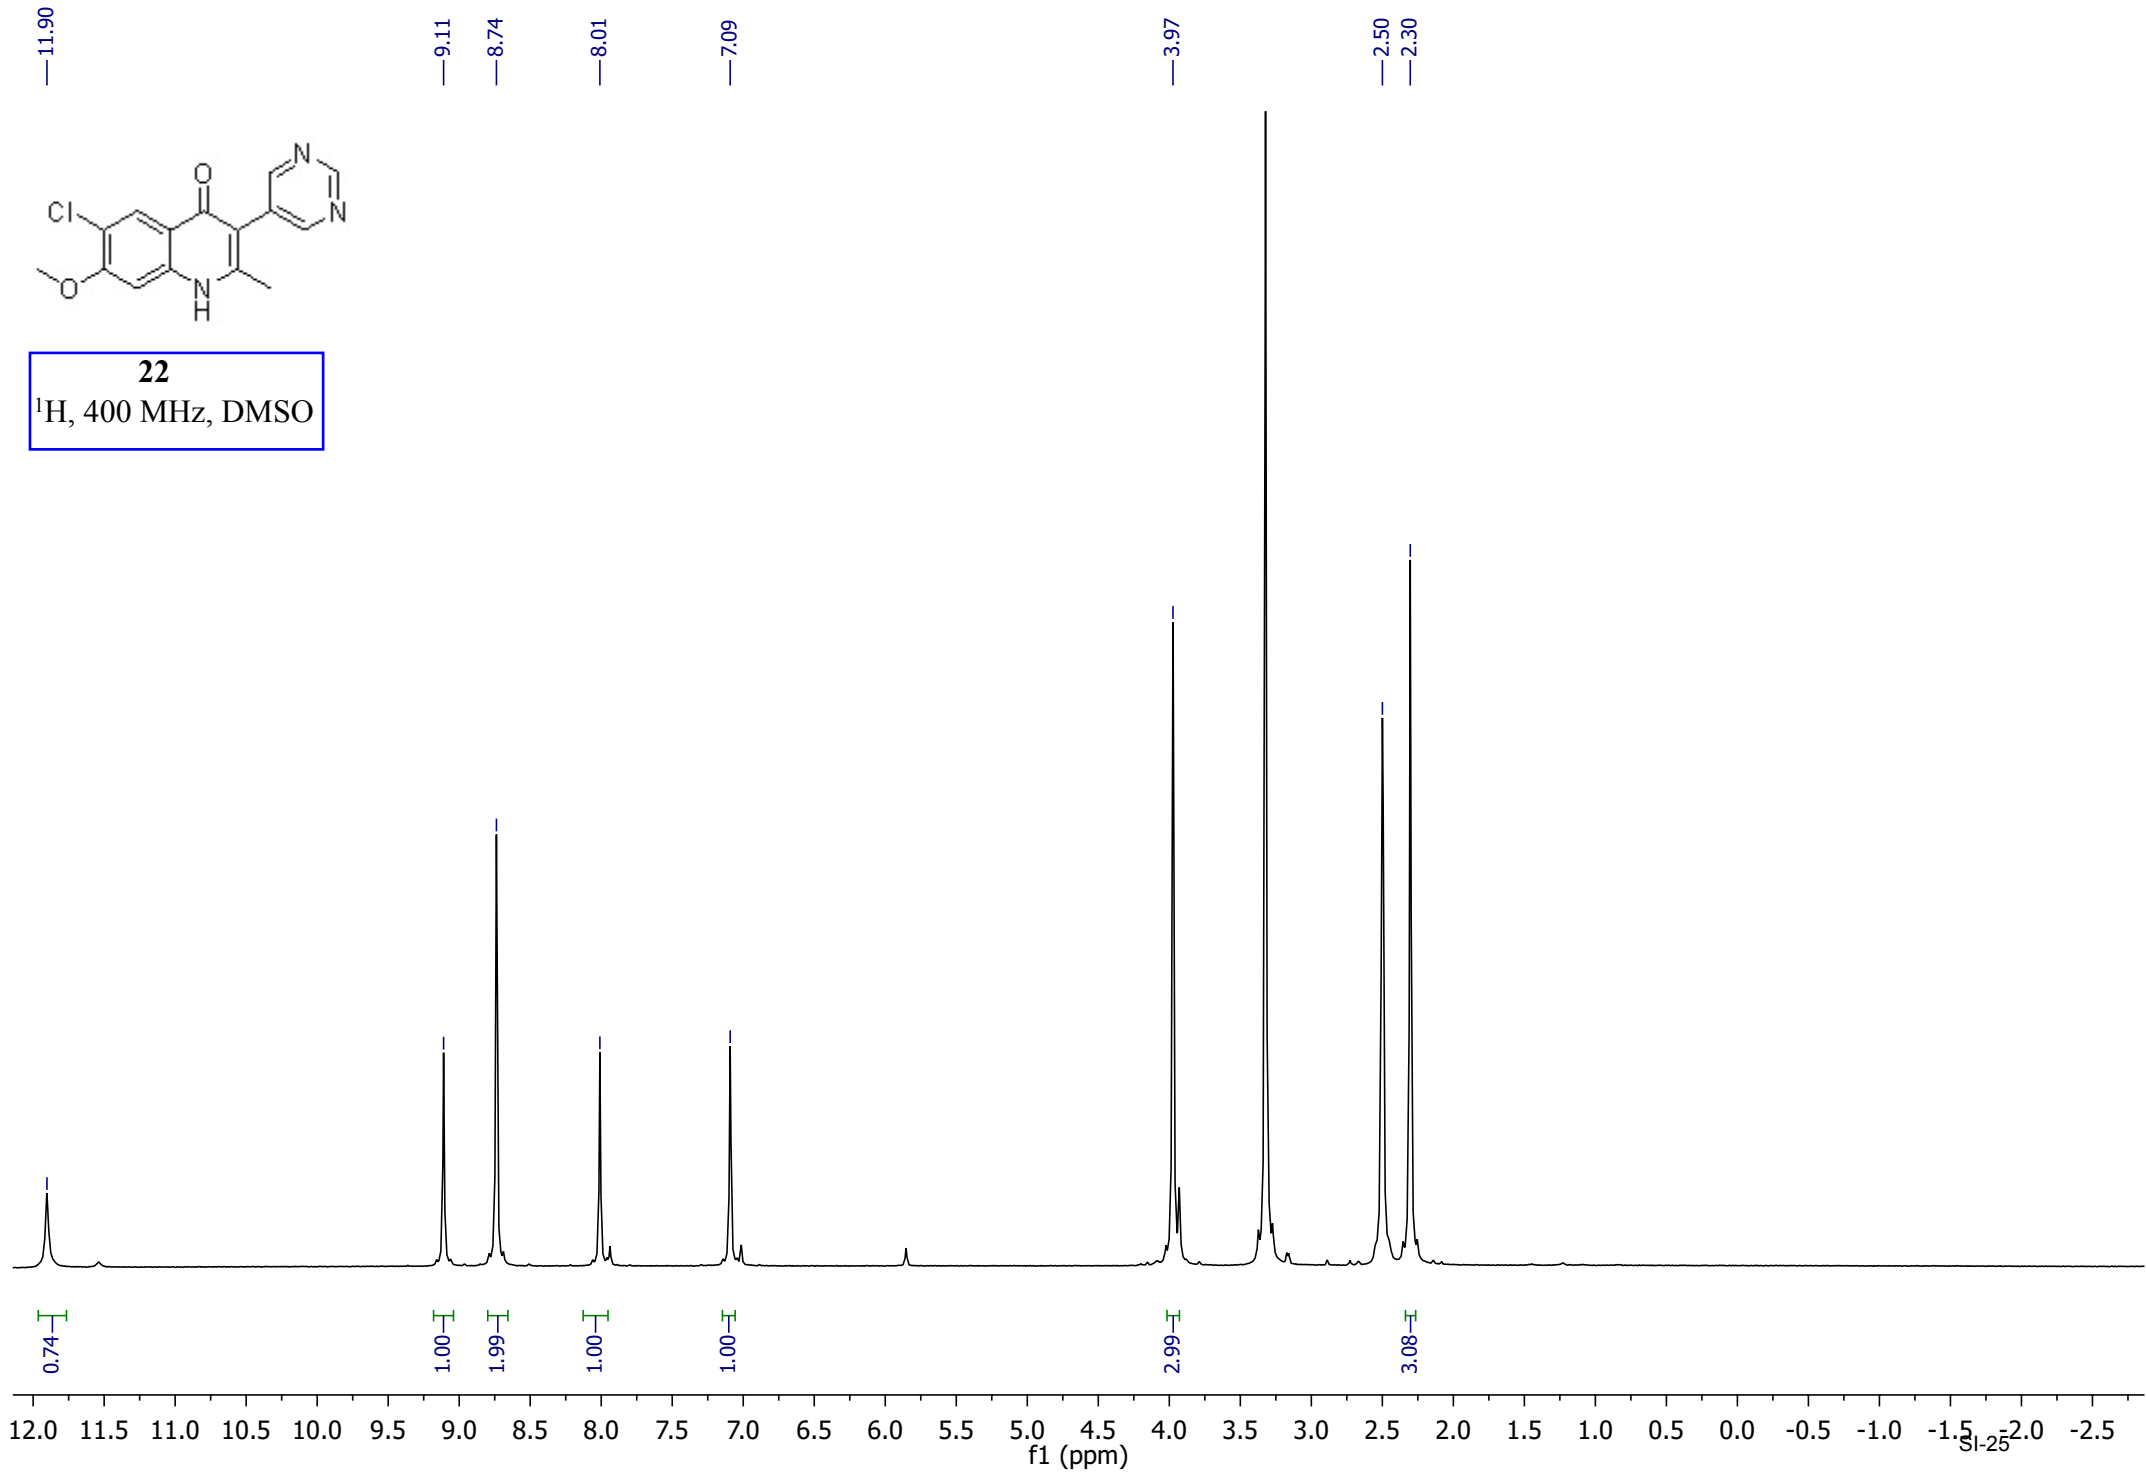

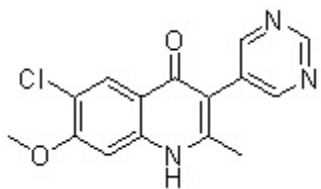

**22**

$^{13}\text{C}$ , 101 MHz, DMSO

—173.88

—159.05

—157.73

—157.12

—148.56

—140.37

—130.39

—126.76

—119.27

—114.44

—108.95

—100.35

—57.15

—19.52

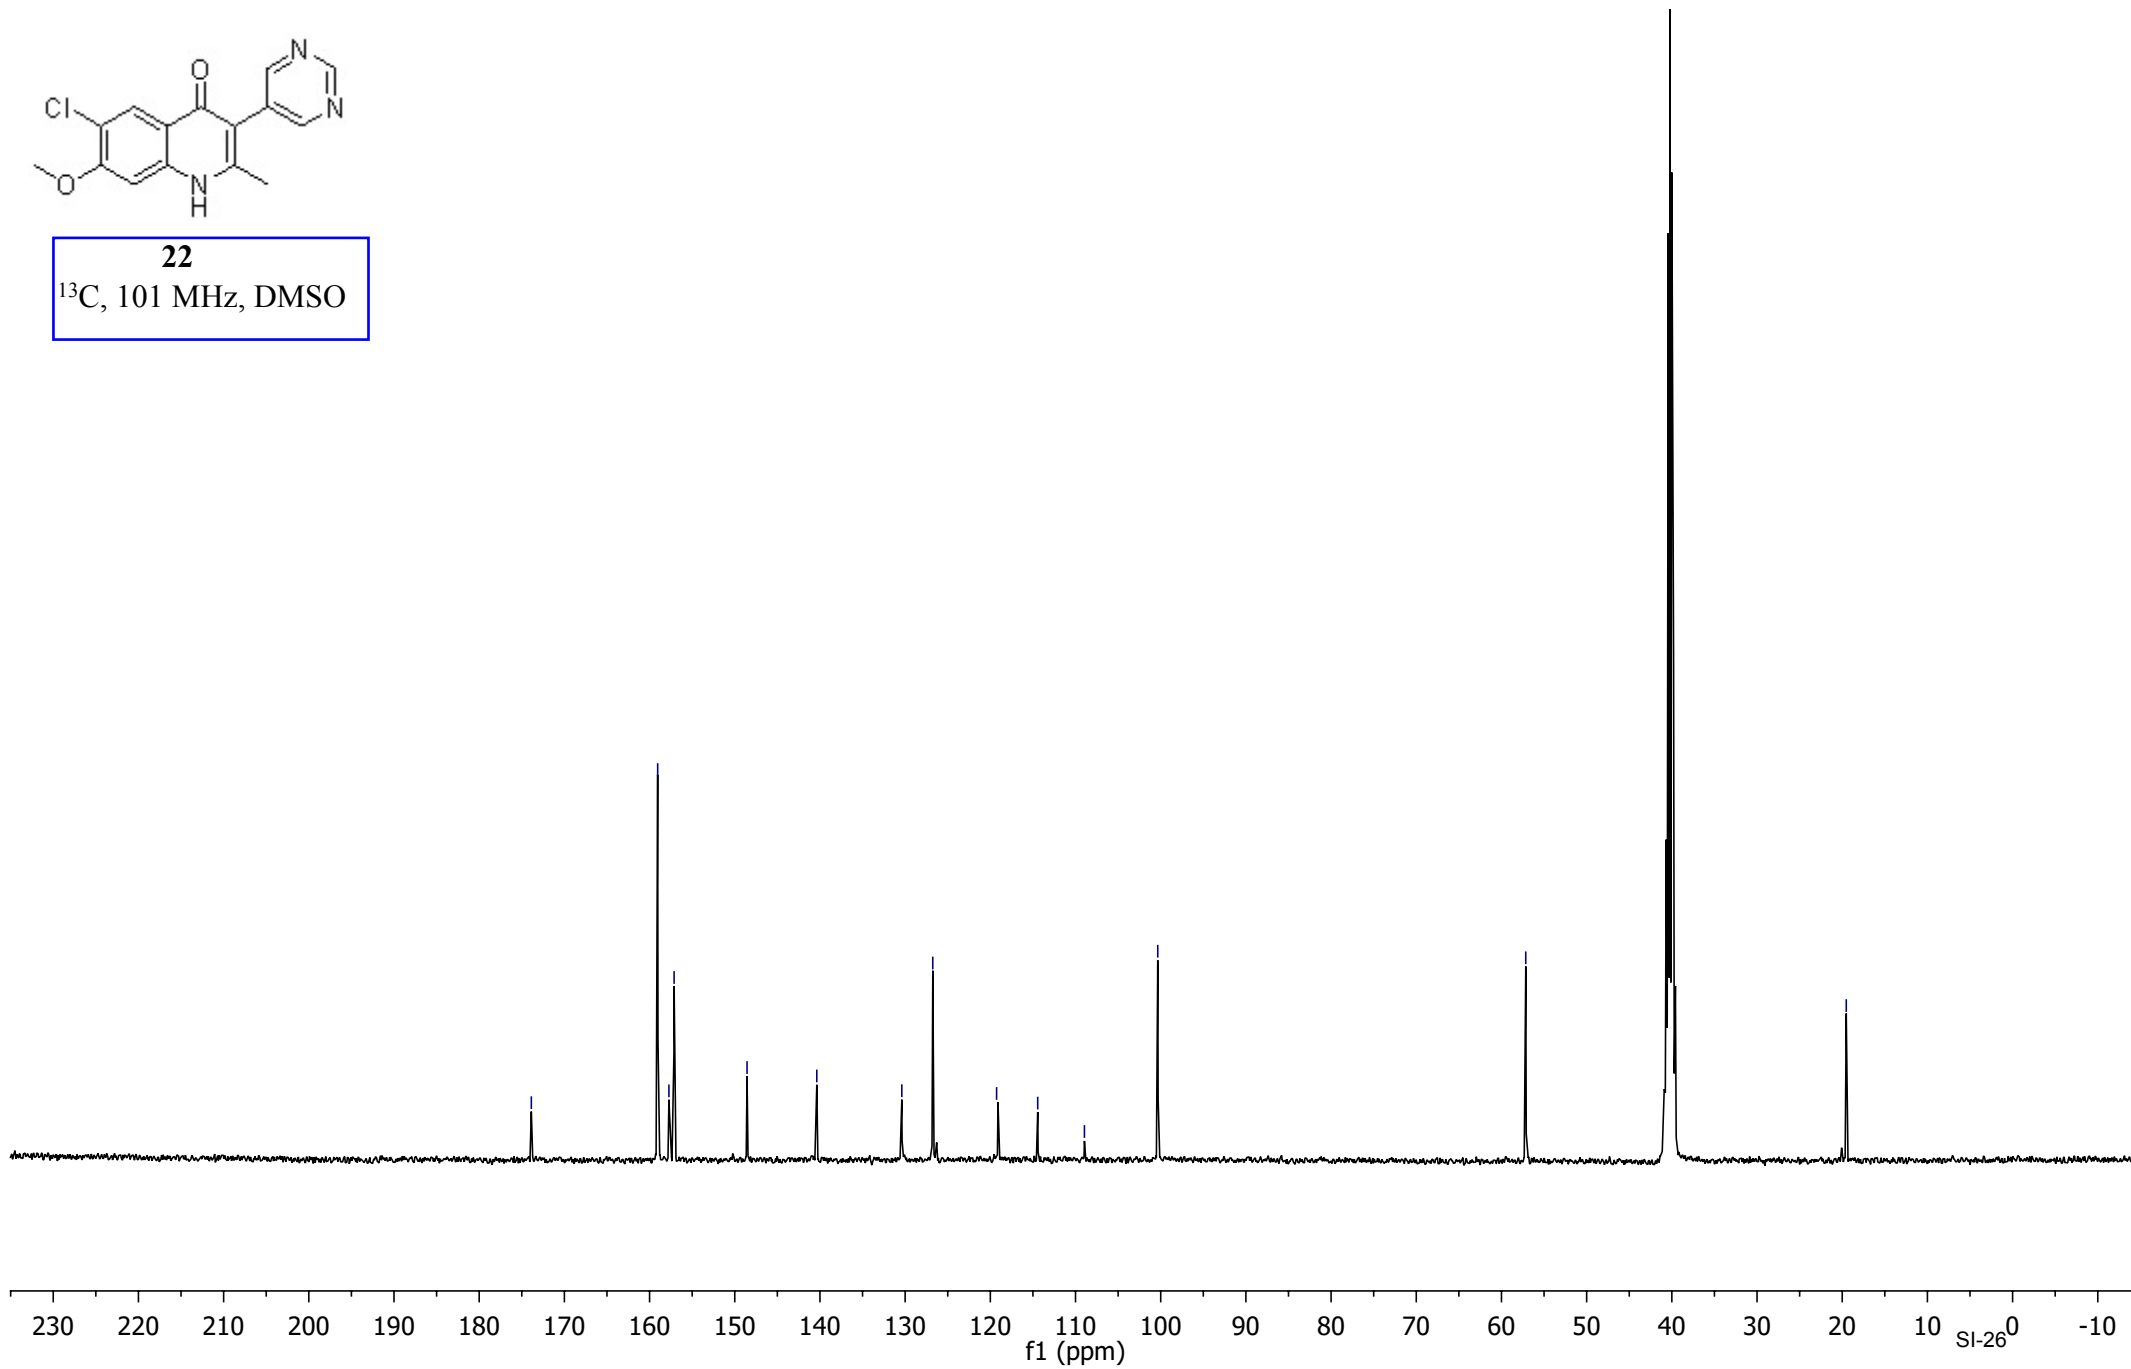

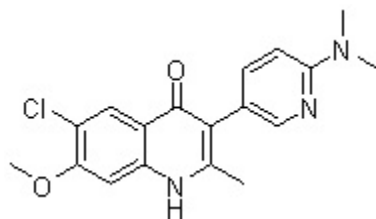

**23**

<sup>1</sup>H, 400 MHz, DMSO

11.61

7.98  
7.94  
7.94  
7.40  
7.40  
7.38  
7.38  
7.03  
6.66  
6.63

3.95

3.04

2.24

0.98

1.06

1.06

1.00

1.08

0.99

2.97

6.06

3.10

Si-27

f1 (ppm)



**23**

$^{13}\text{C}$ , 101 MHz, DMSO

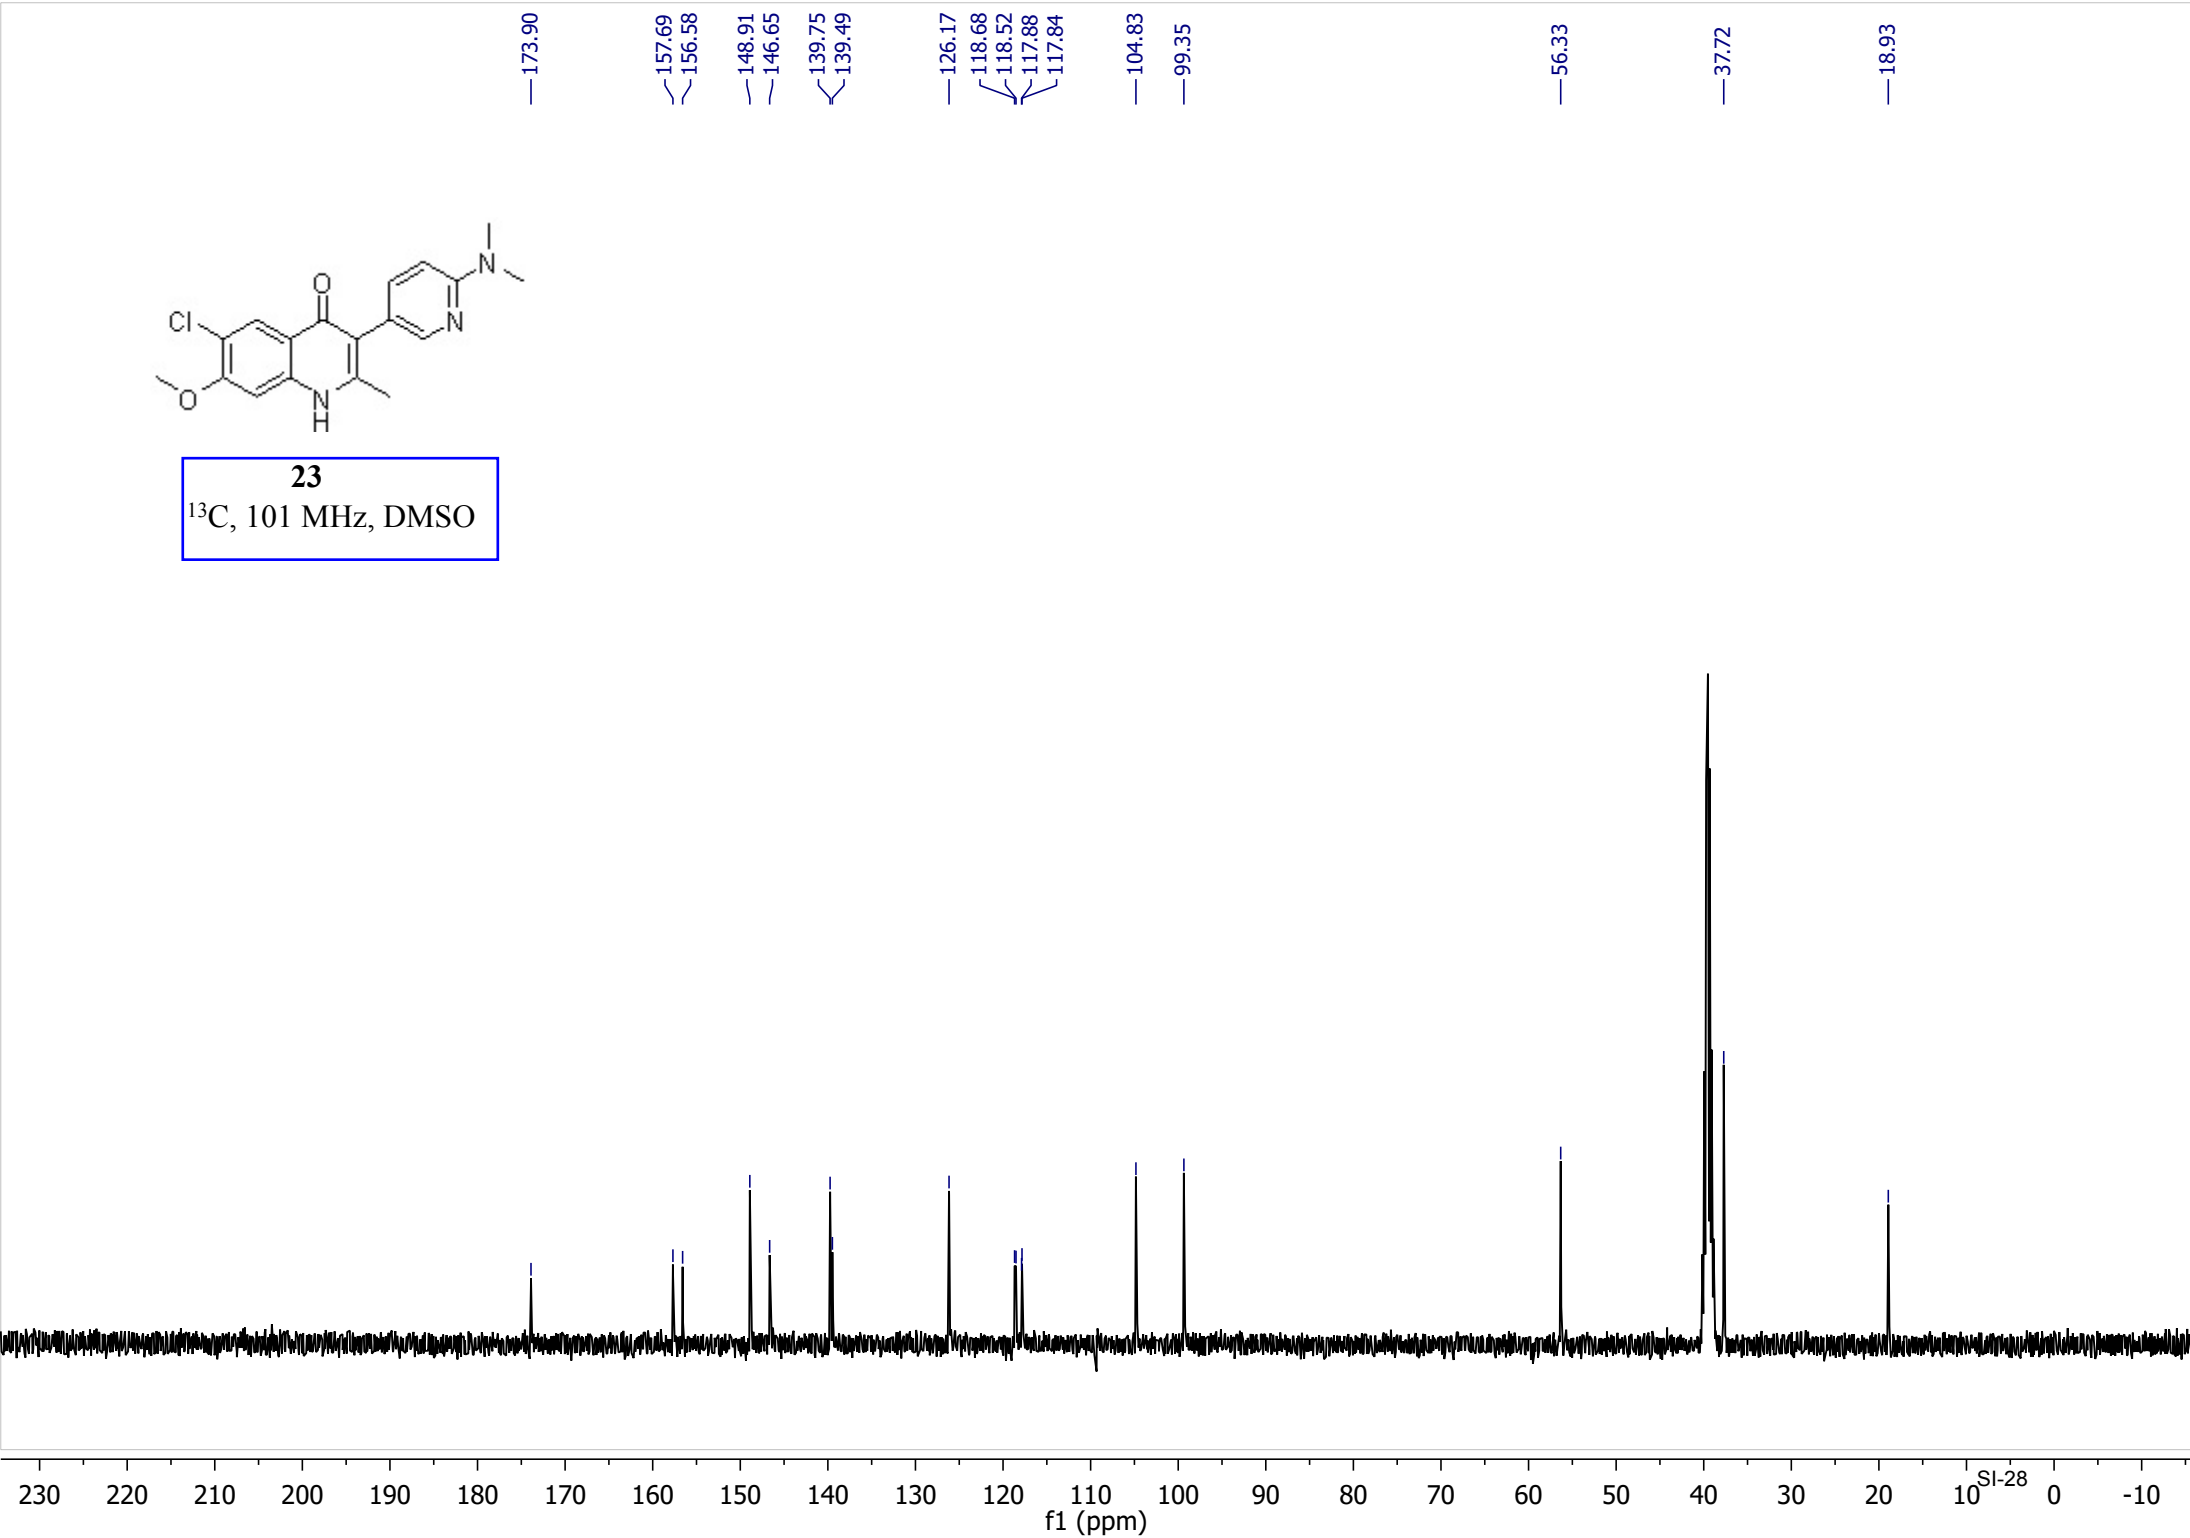

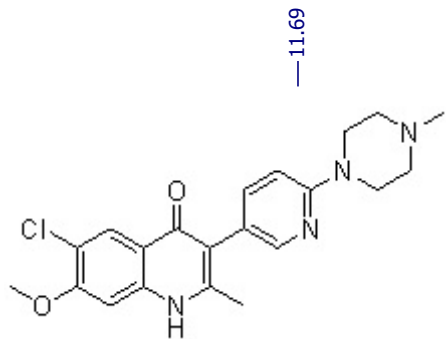

**24**  
<sup>1</sup>H, 400 MHz, DMSO

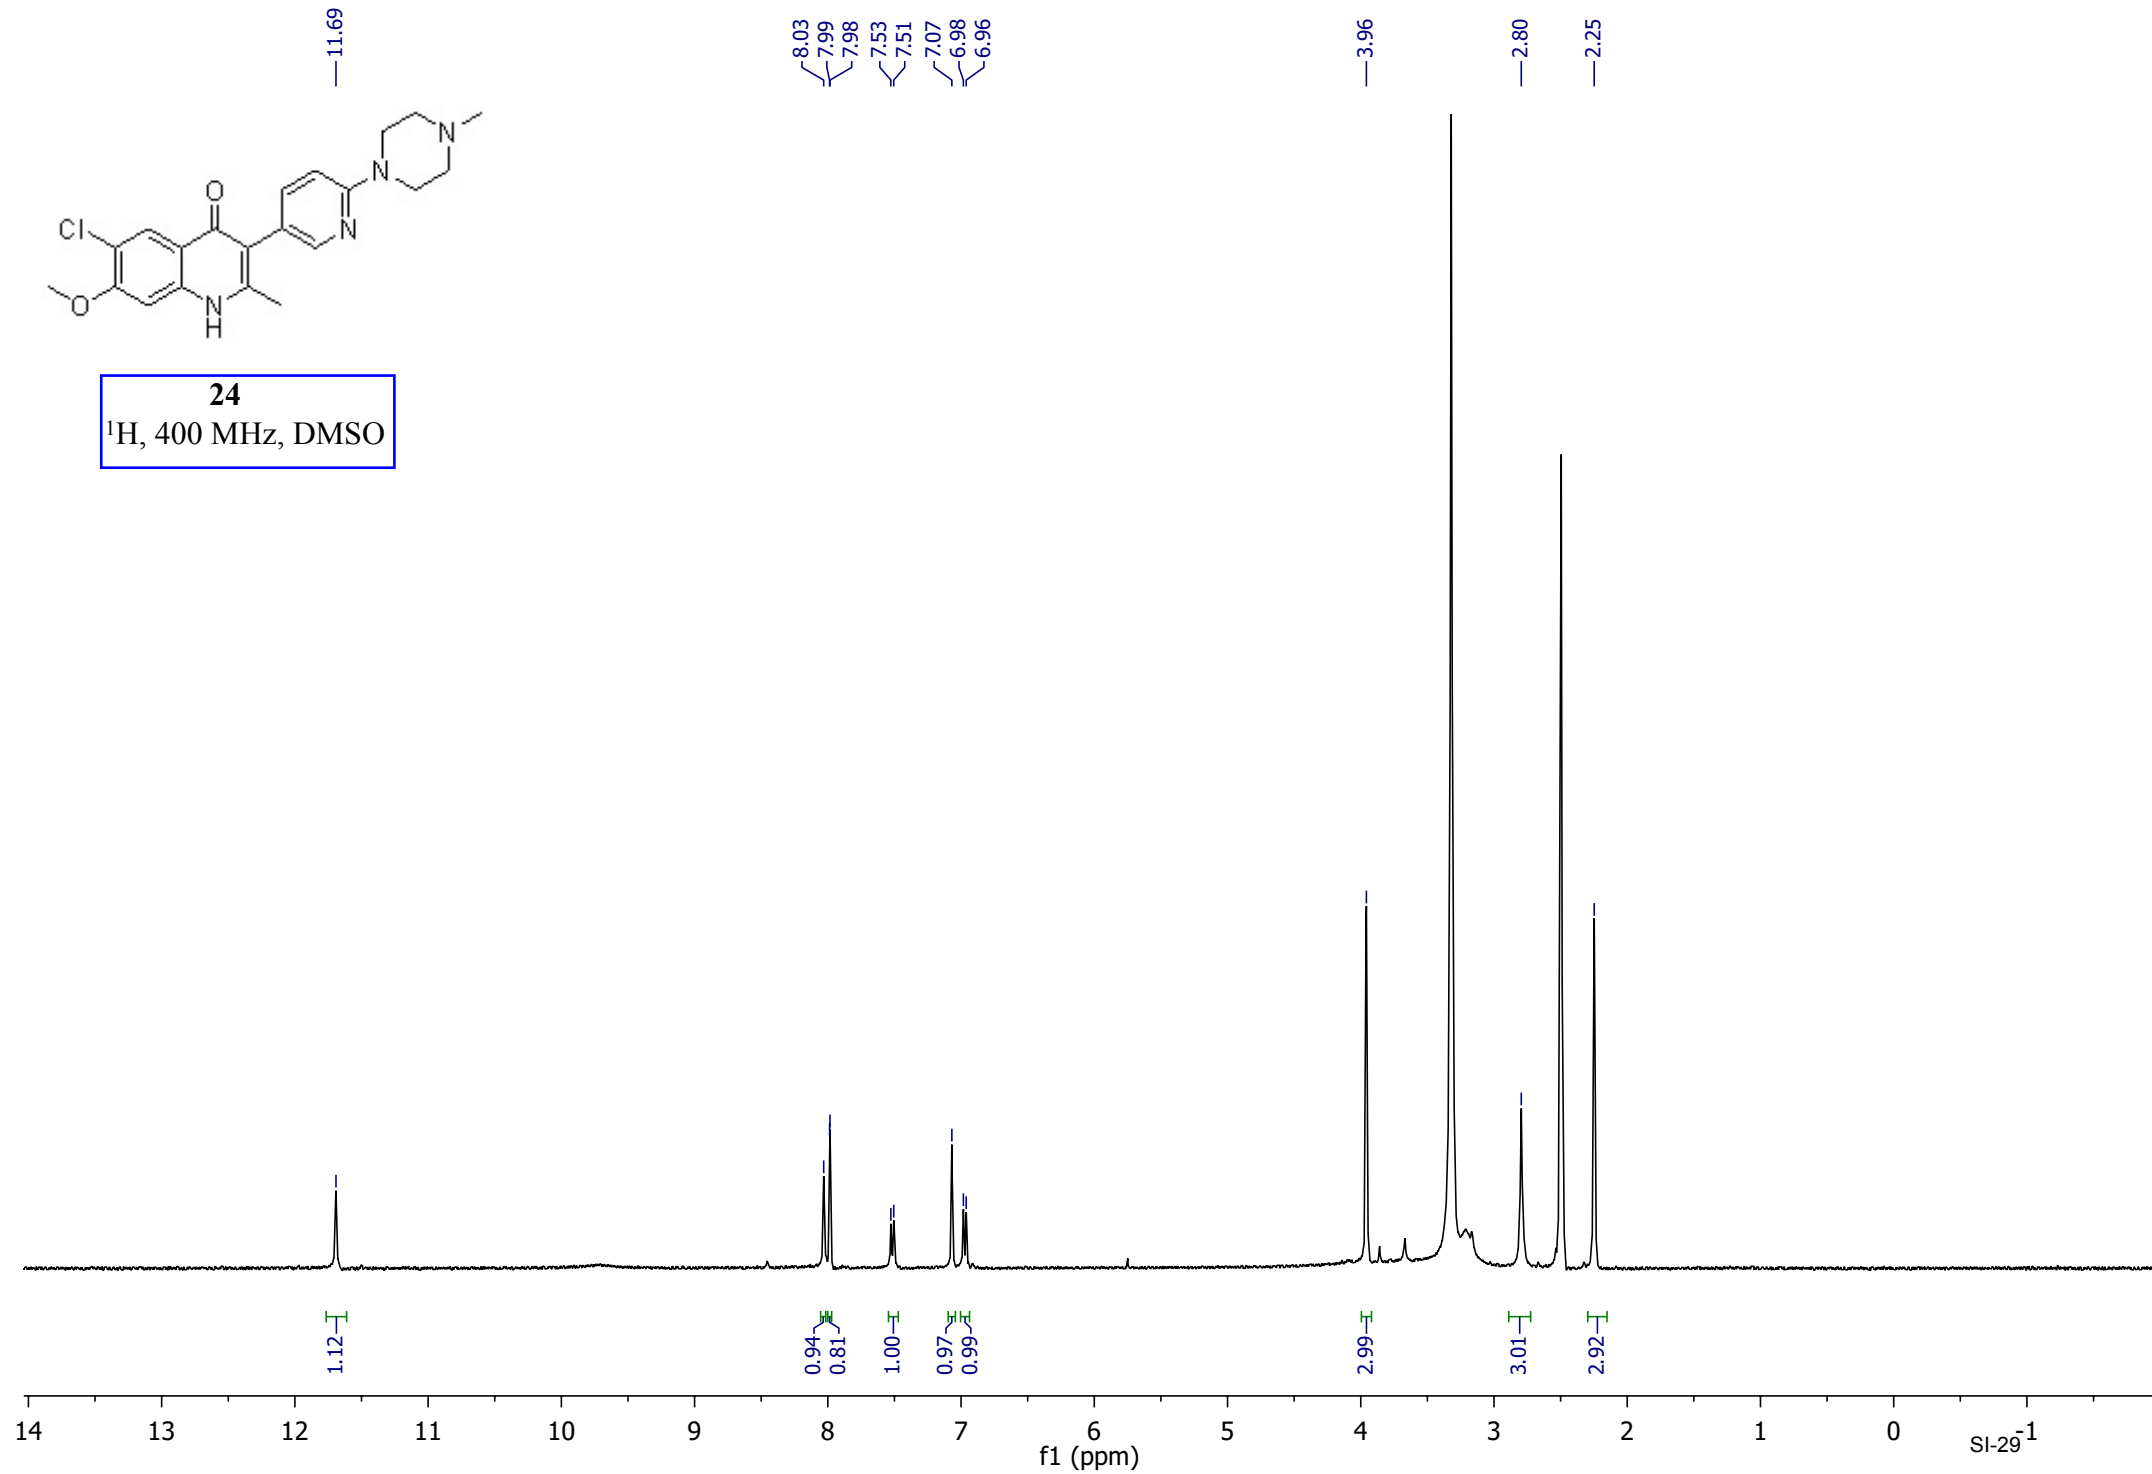

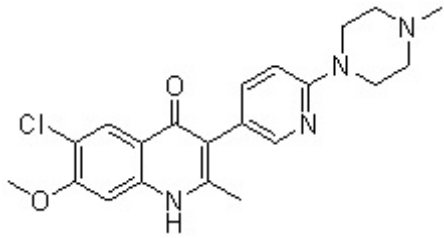

**24**  
<sup>13</sup>C, 101 MHz, DMSO

—173.77

156.69  
156.49

149.03  
146.93

140.49  
139.55

126.14

121.62

118.51

118.04

117.30

—106.76

—99.44

—56.42

—52.32

42.44  
42.29

—18.92

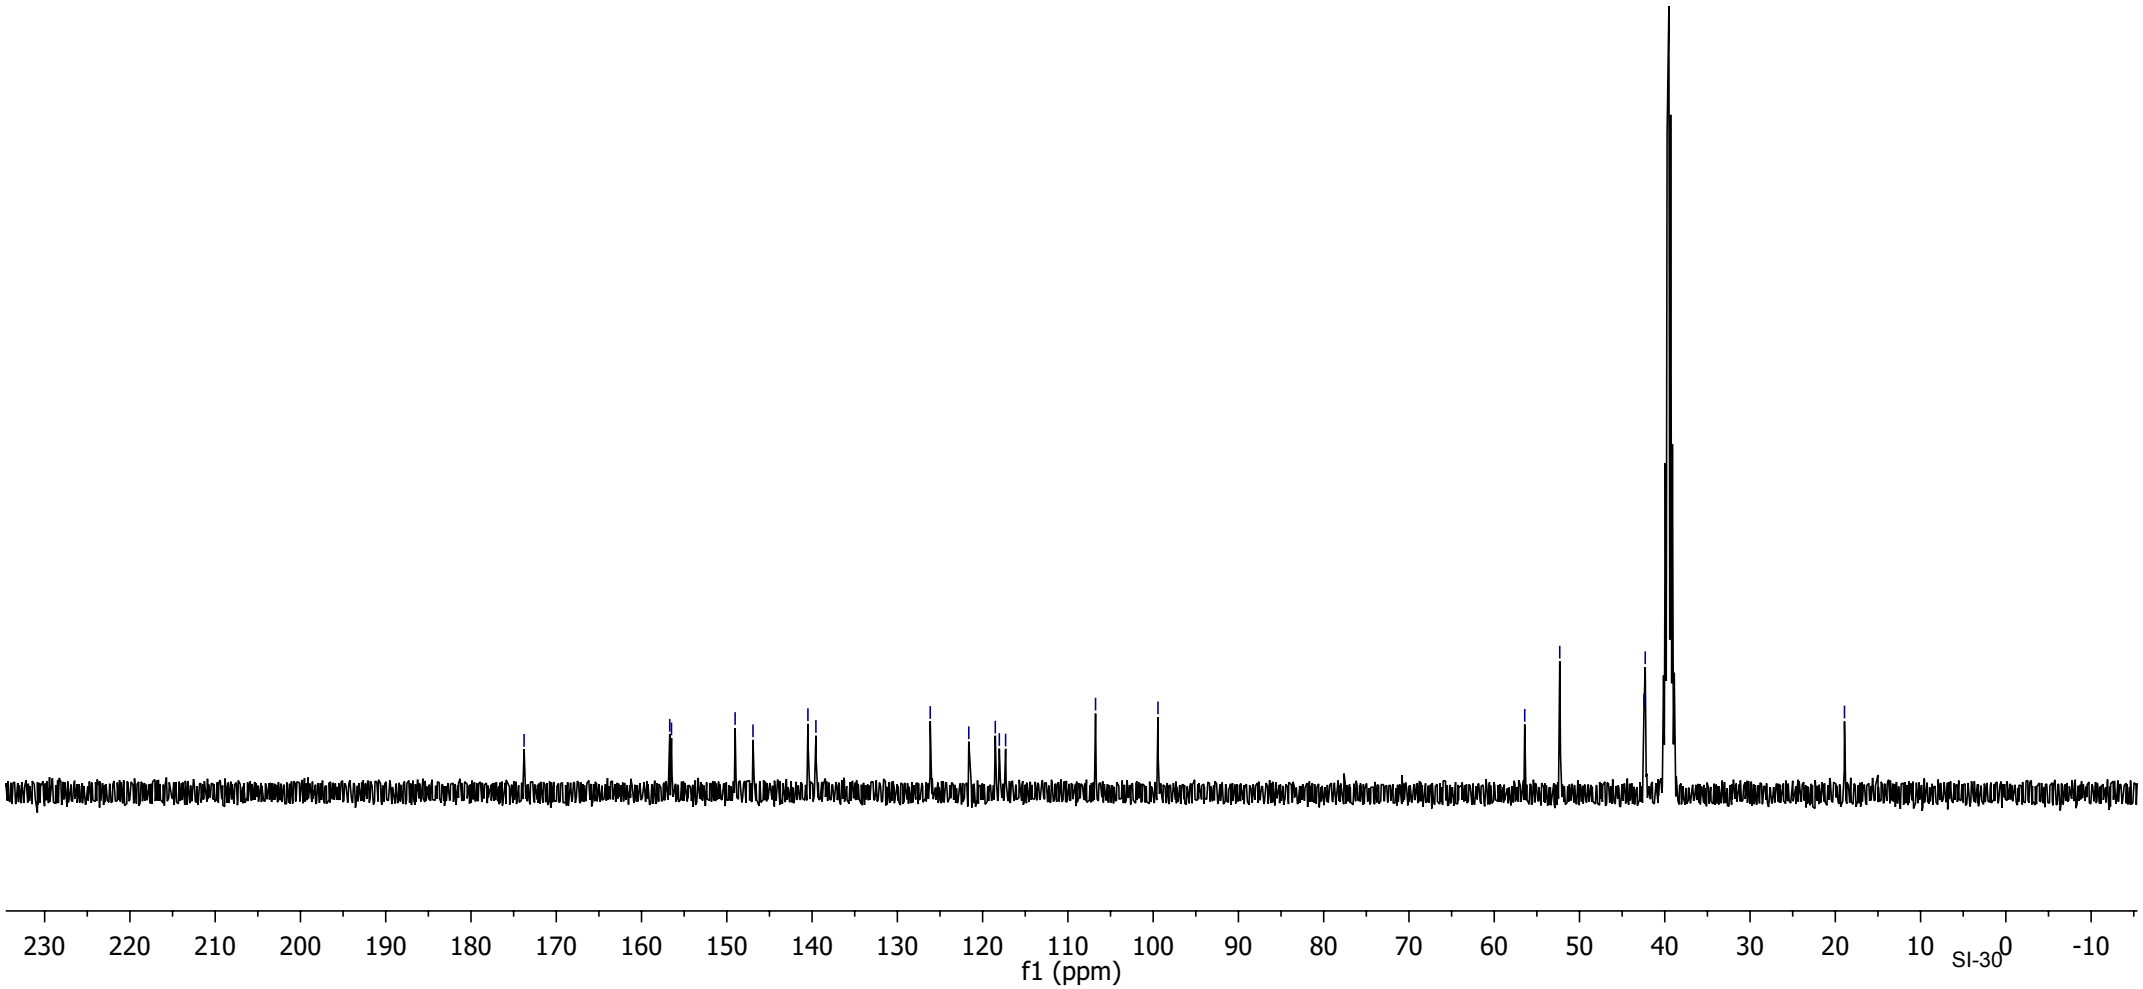

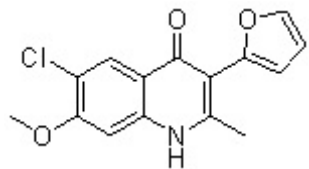

**25**  
<sup>1</sup>H, 400 MHz, DMSO

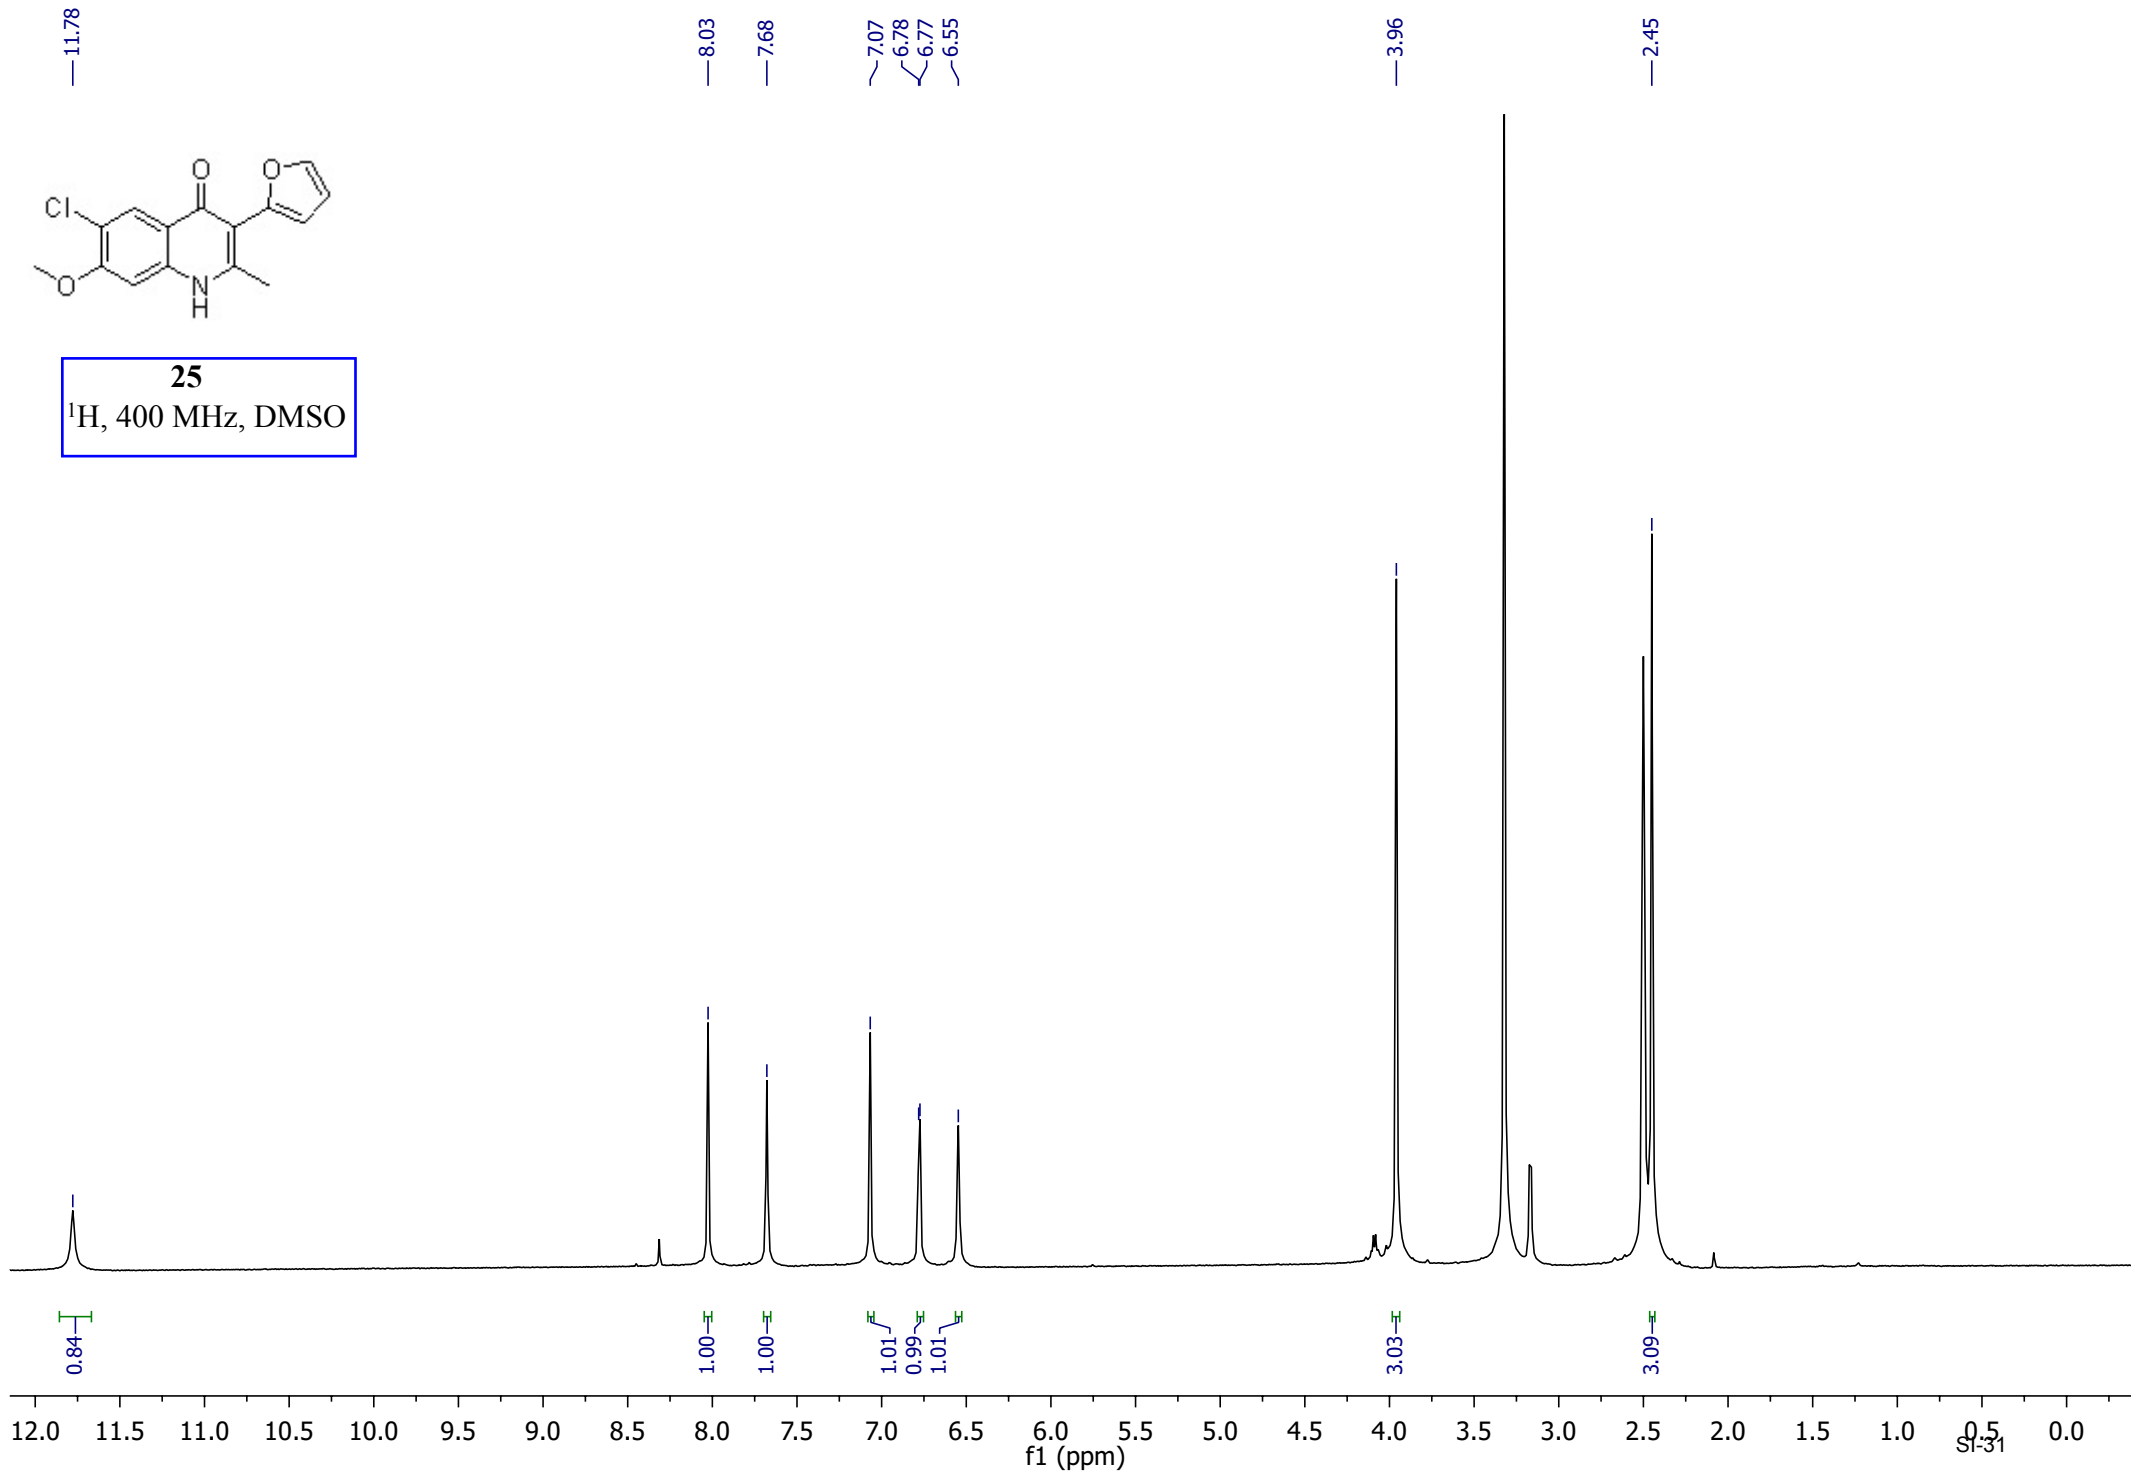



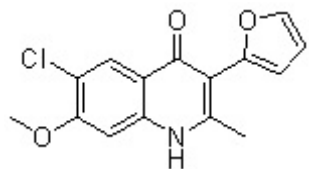

**25**  
<sup>13</sup>C, 101 MHz, DMSO

—173.17  
—157.42  
—149.37  
—148.82  
—141.91  
—139.68  
—126.81  
—119.17  
—119.09  
—111.42  
—111.27  
—111.06  
—100.24  
—57.06  
—20.11

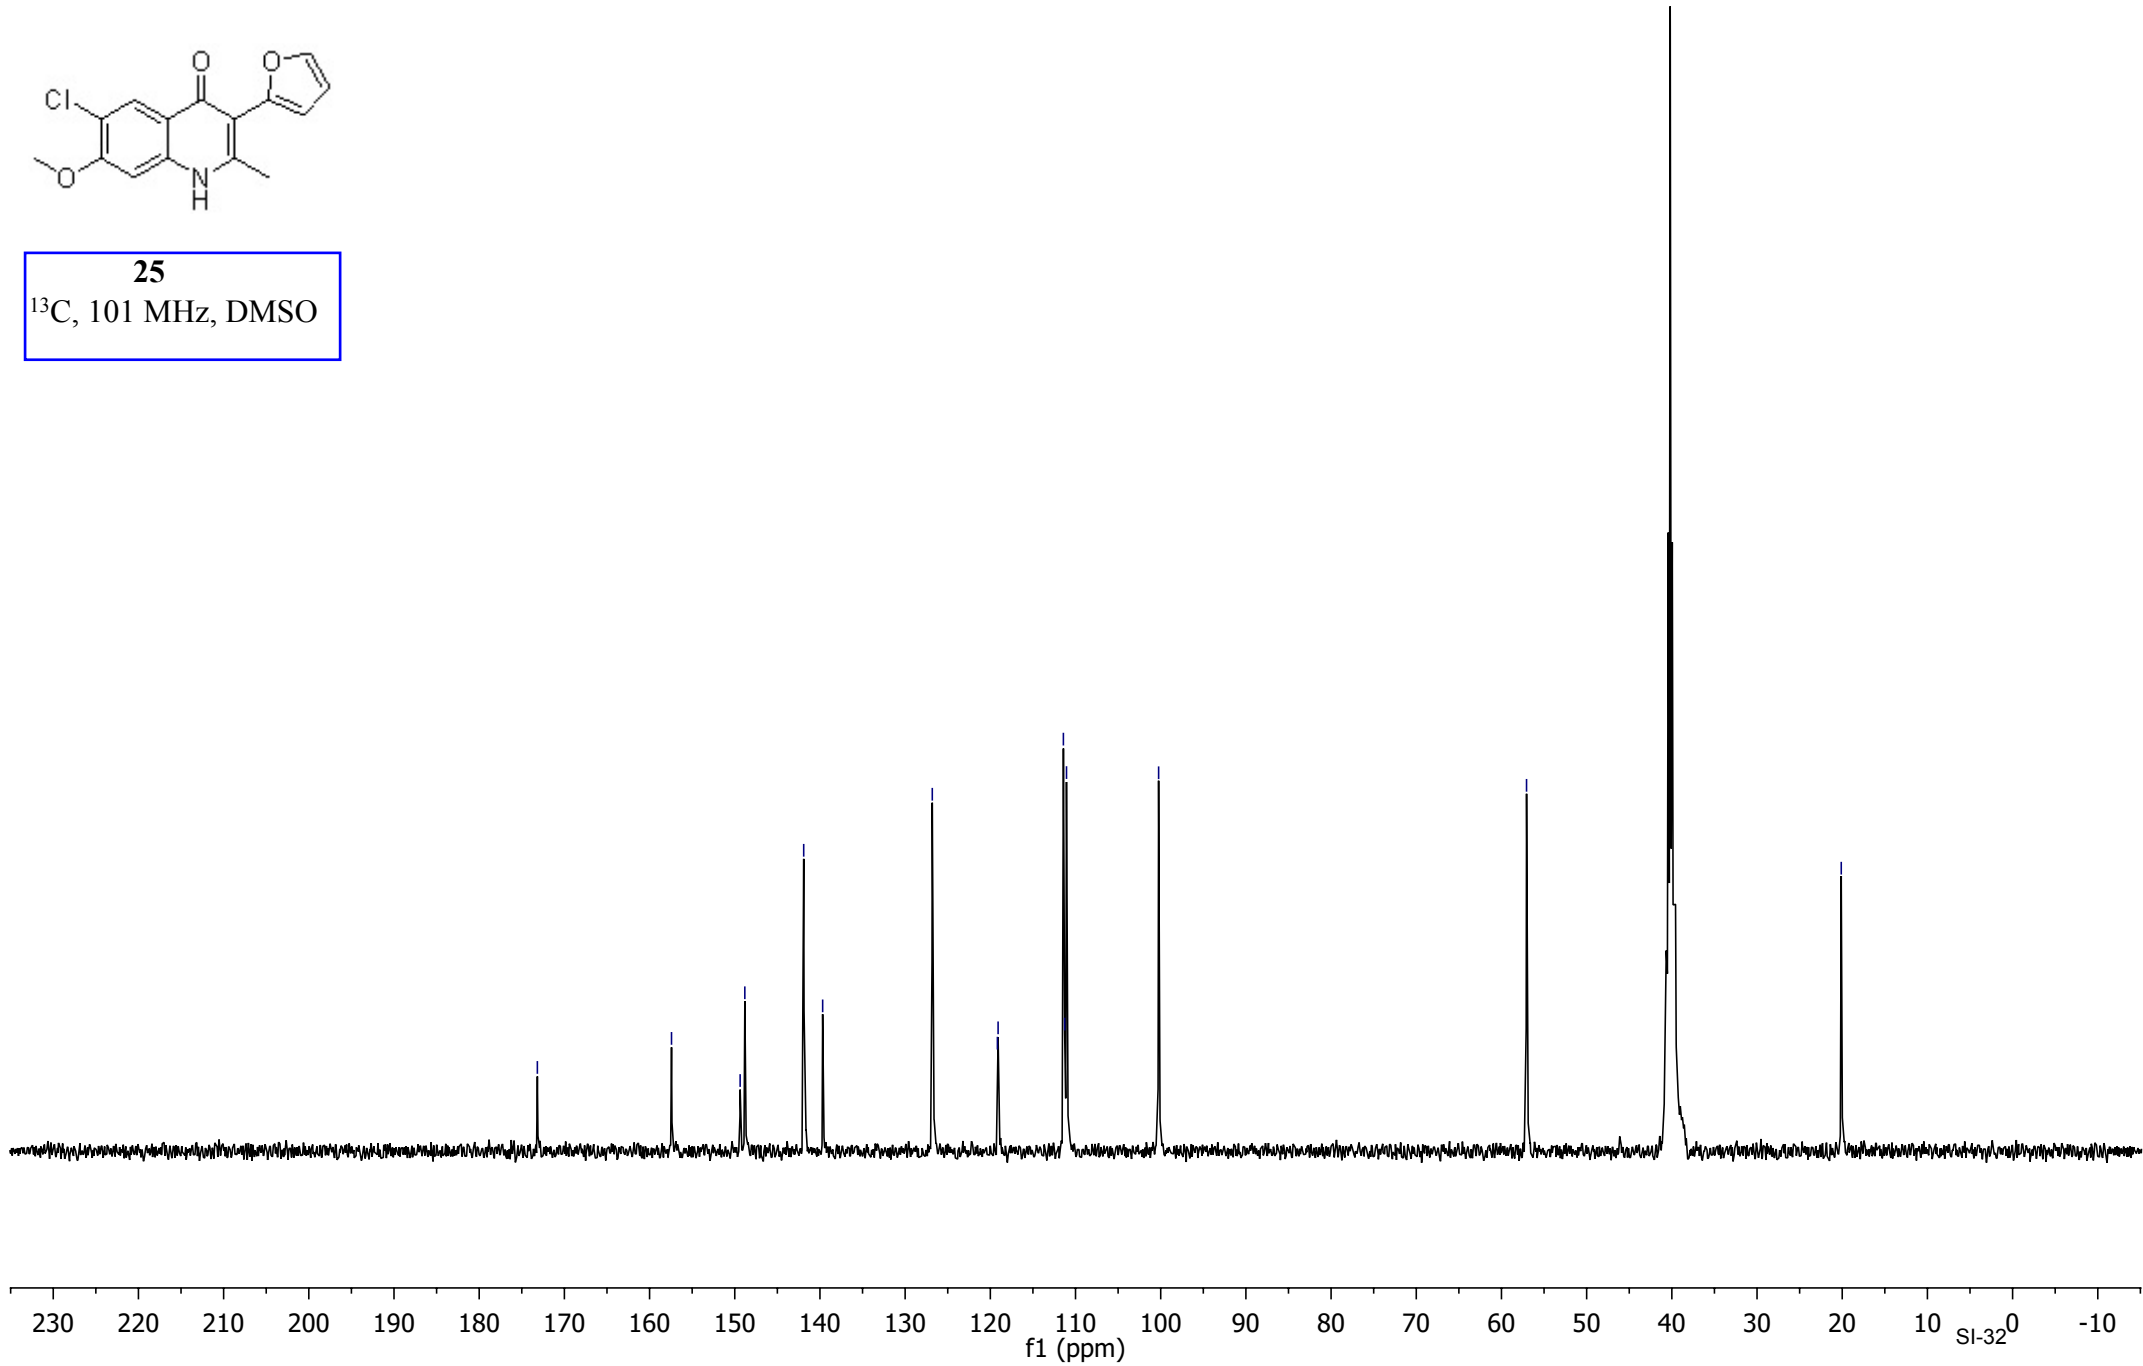

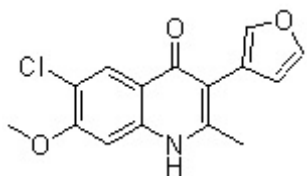

**26**

<sup>1</sup>H, 400 MHz, DMSO

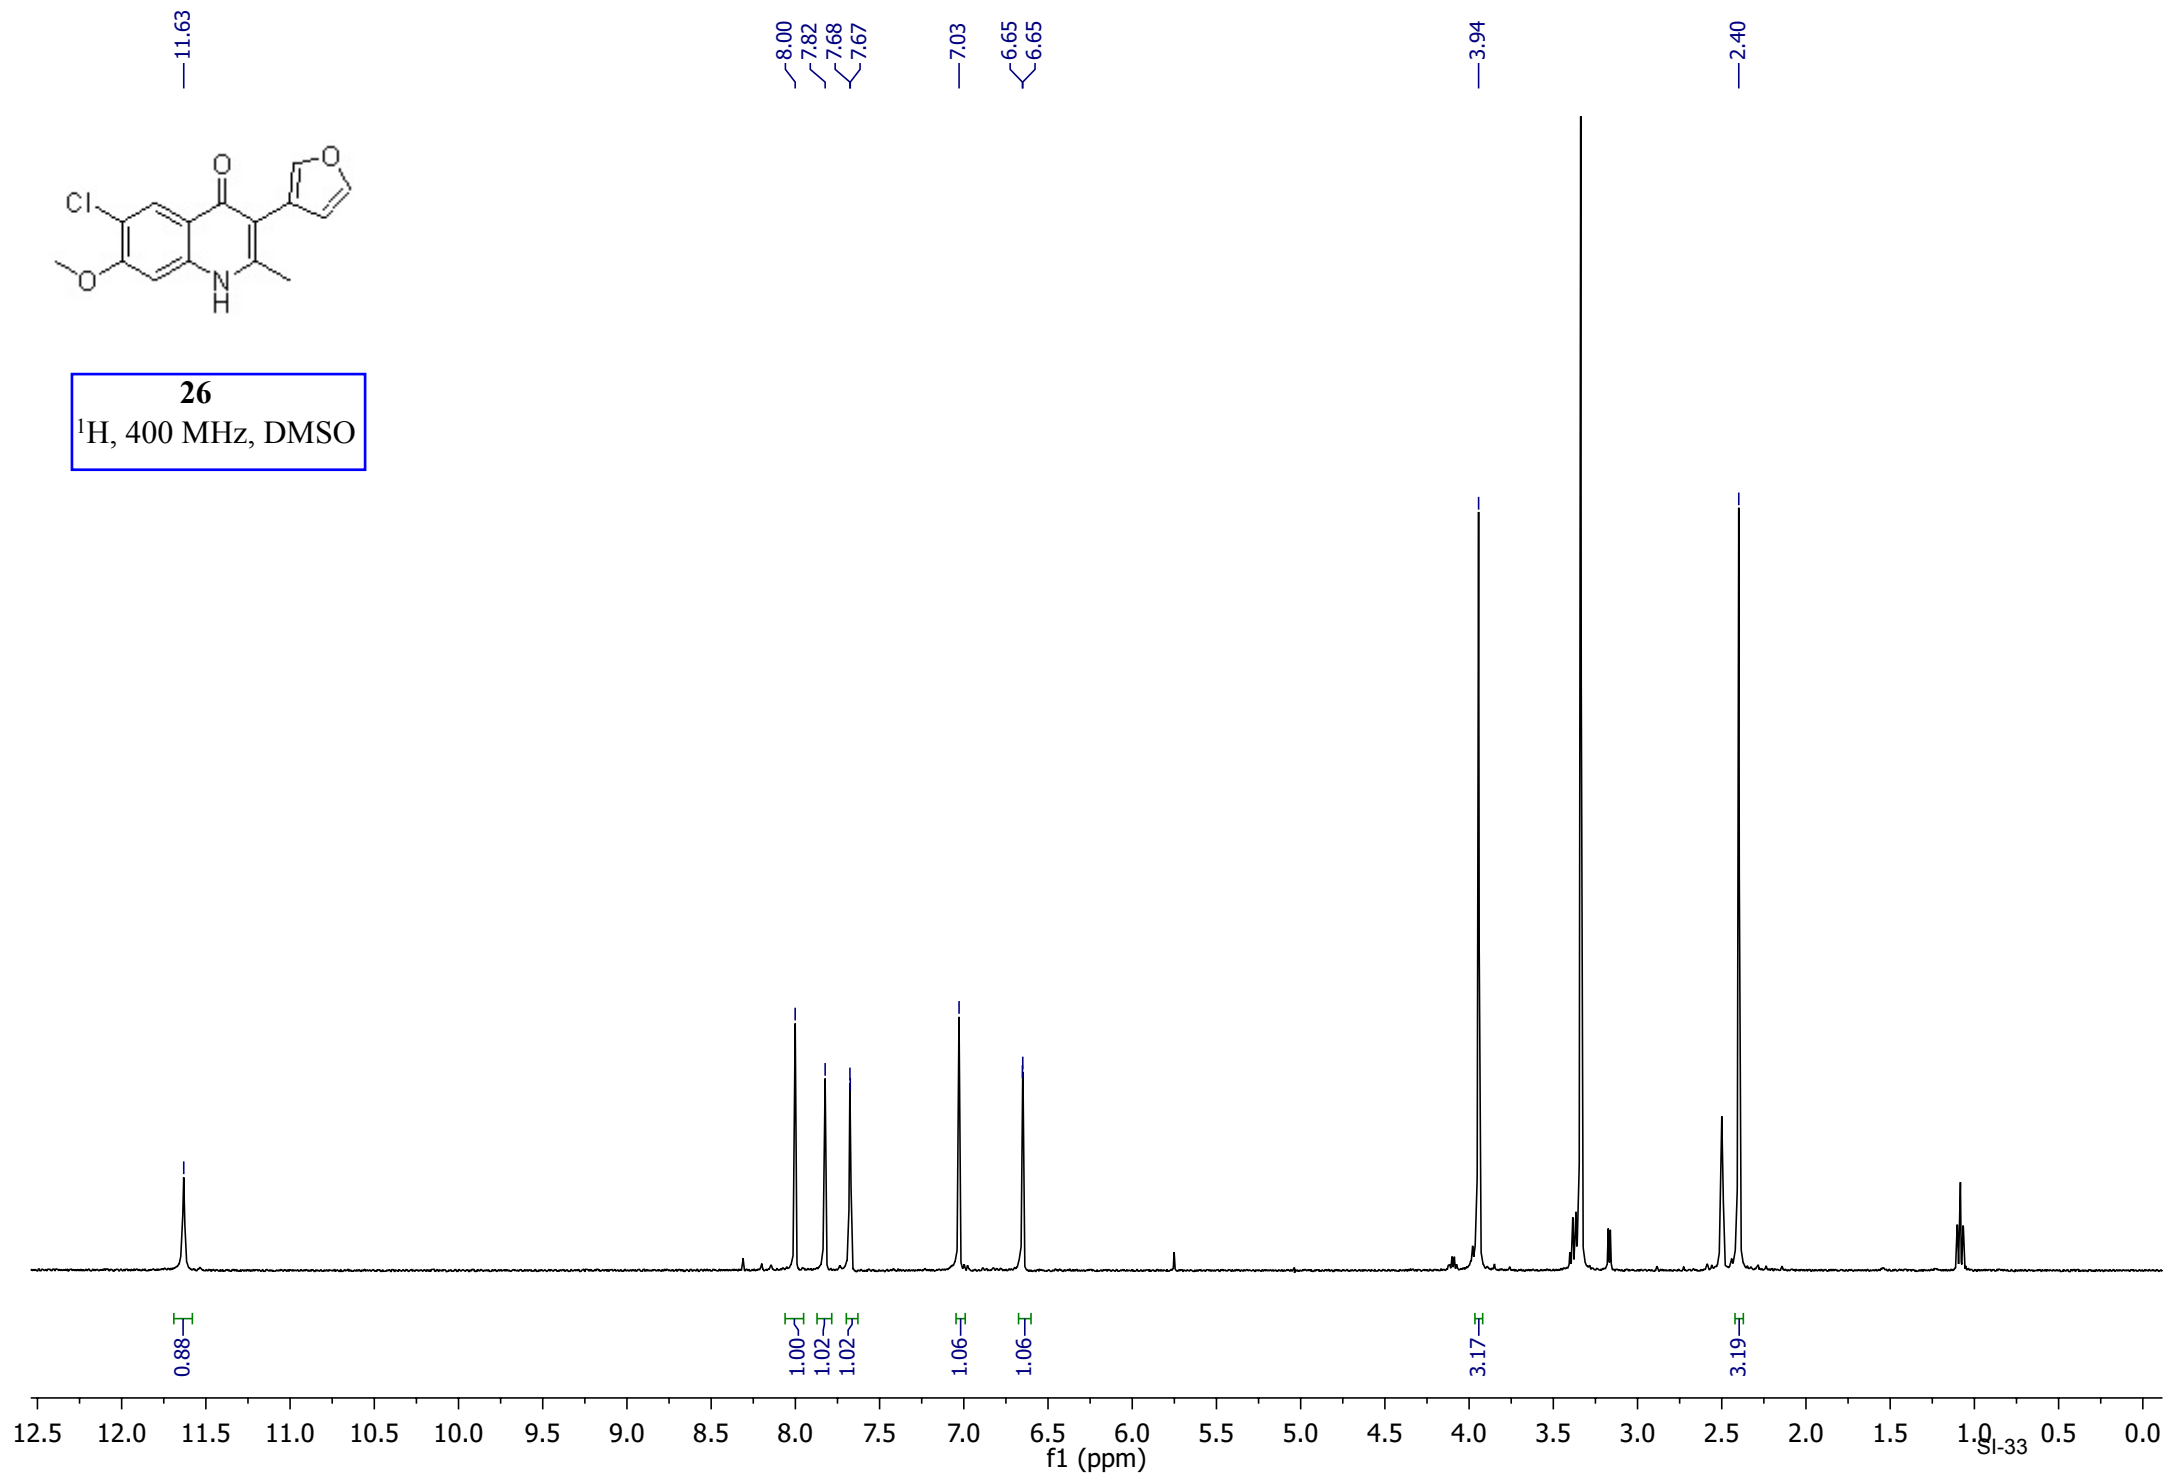

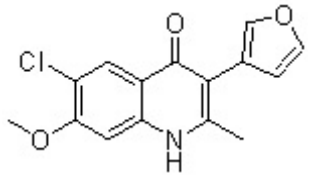

**26**

<sup>13</sup>C, 101 MHz, DMSO

—173.41

—156.74

~147.03

~142.01

~141.82

~139.25

—126.28

~118.37

~118.33

~118.23

~112.80

~111.63

—99.42

—56.48

—19.44

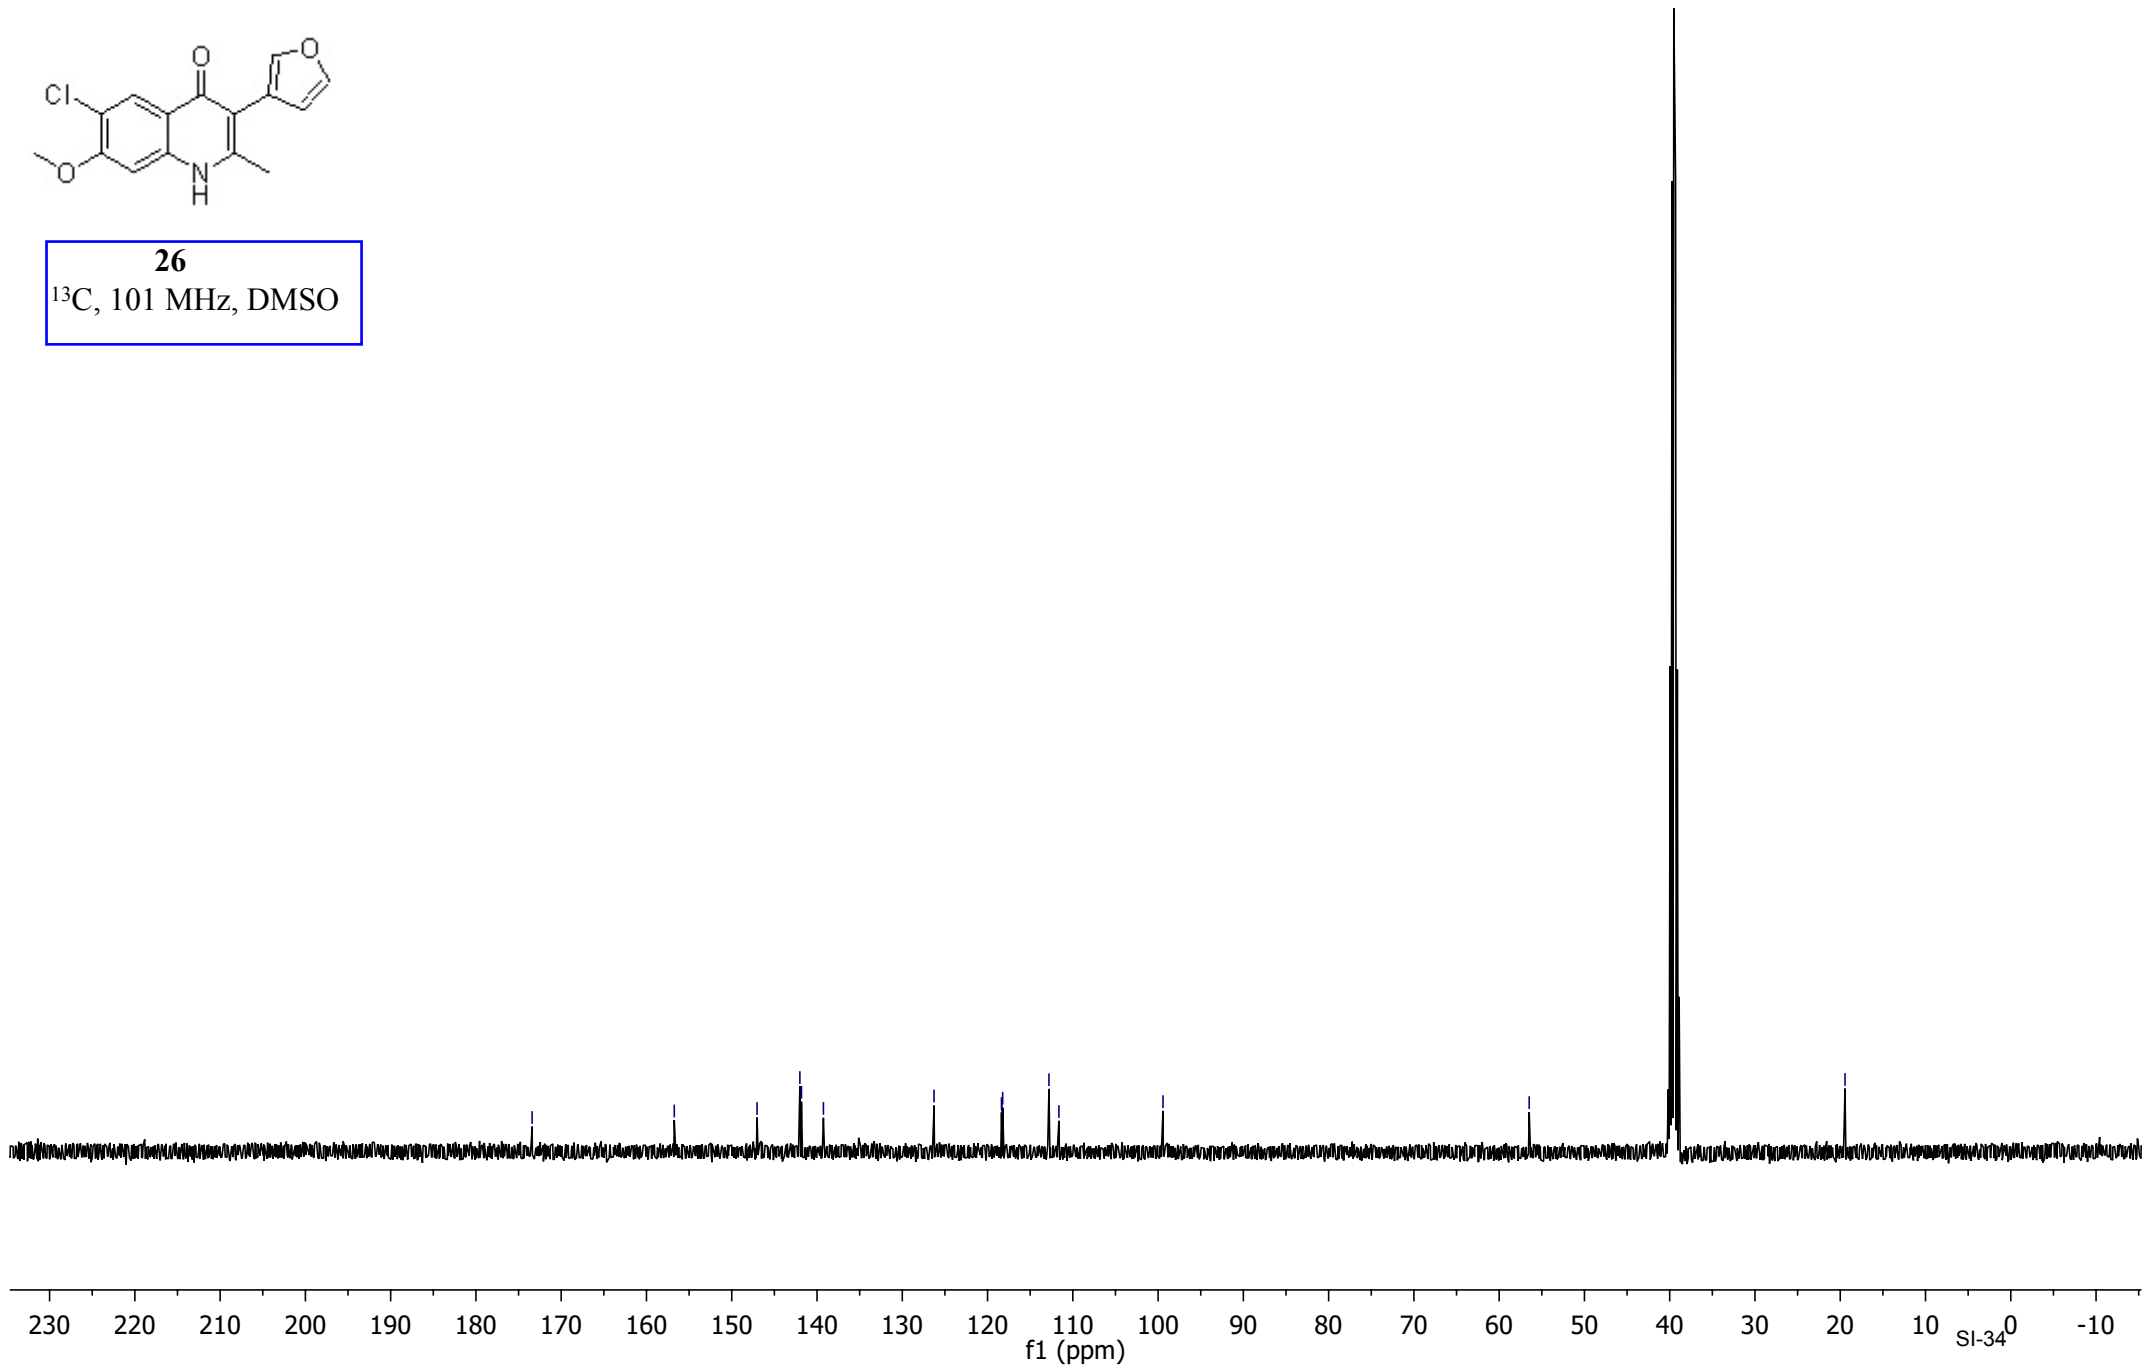

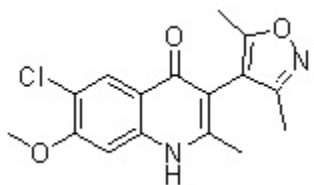

**27**  
<sup>1</sup>H, 400 MHz, DMSO

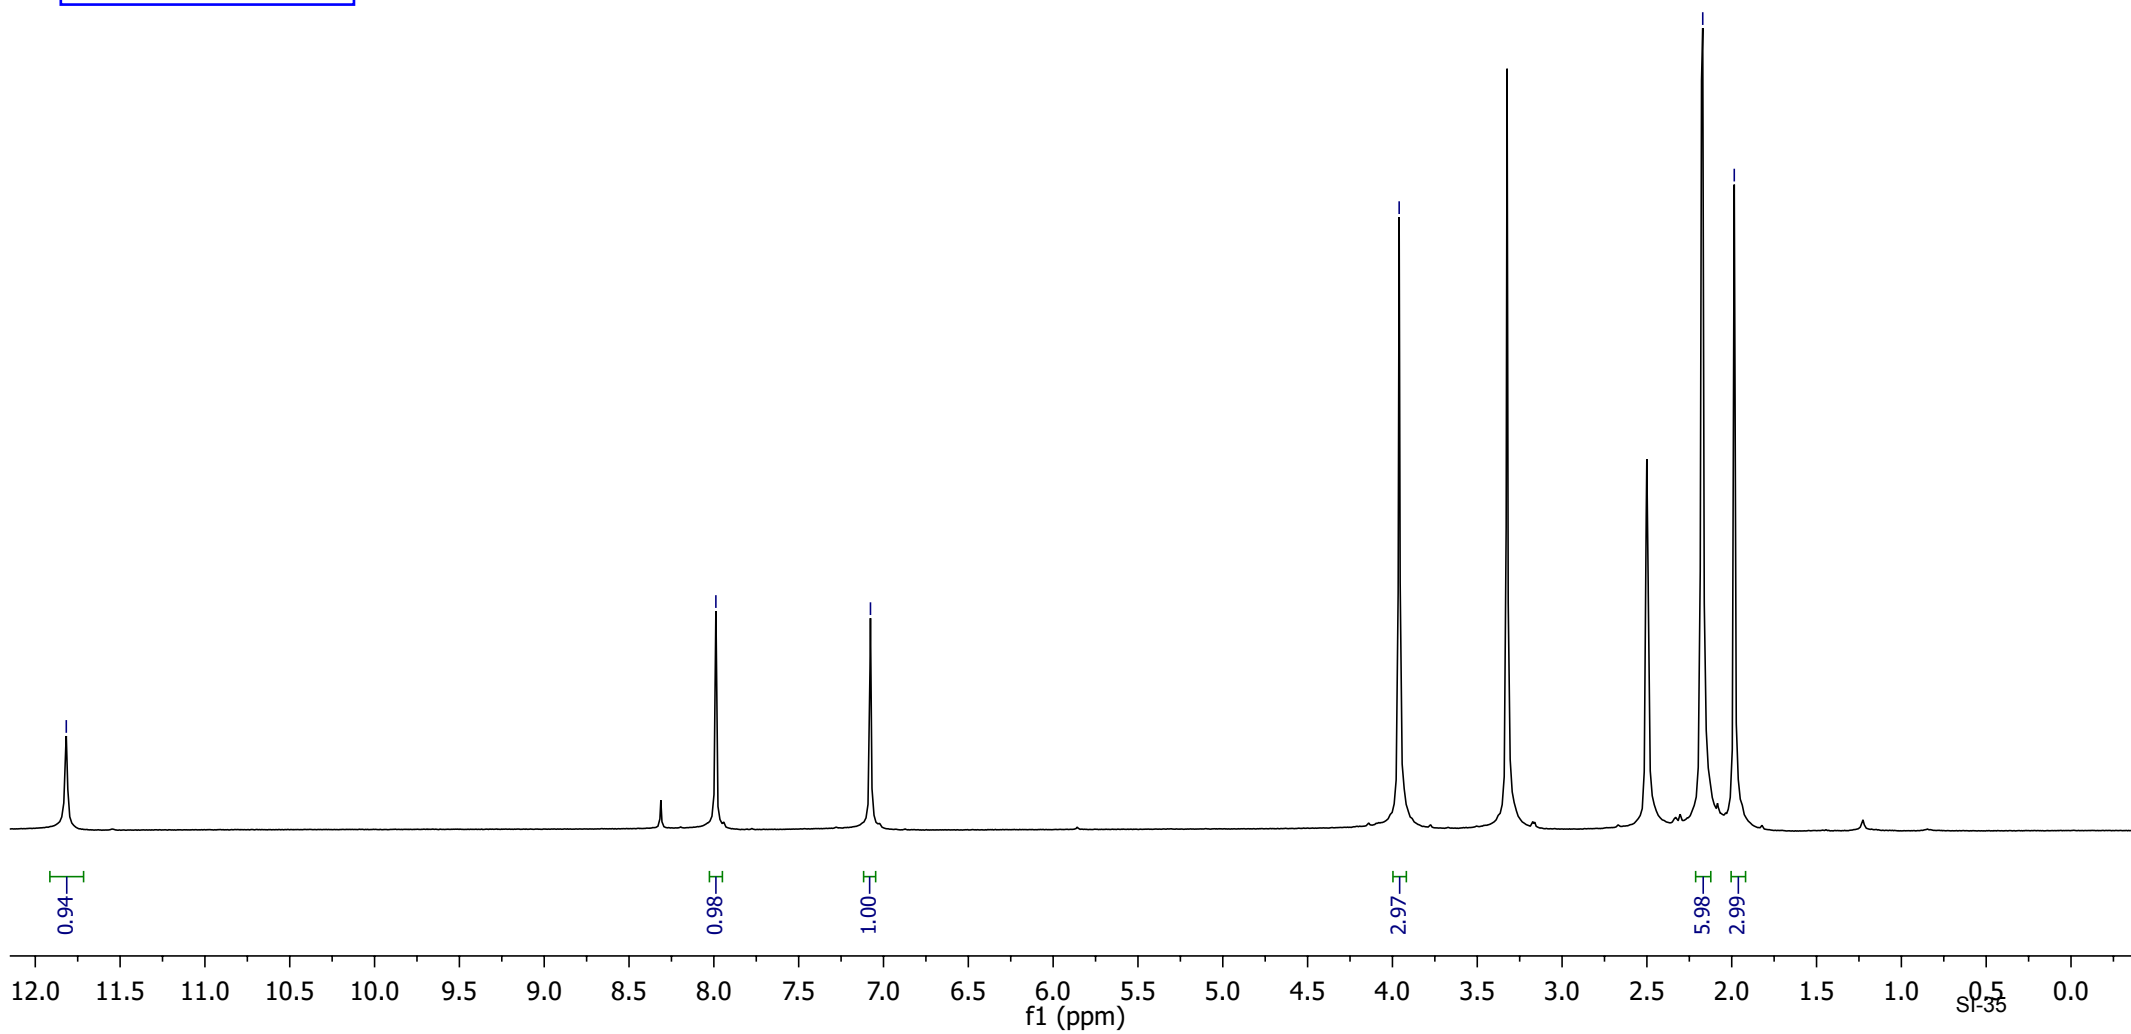



27  
<sup>13</sup>C, 101 MHz, DMSO

—174.14  
—166.58  
—160.84  
—157.54  
—149.51  
—140.41  
—126.74  
—118.98  
—118.87  
—111.11  
—108.96  
—100.24  
—57.12  
—19.00  
—11.94  
—10.89

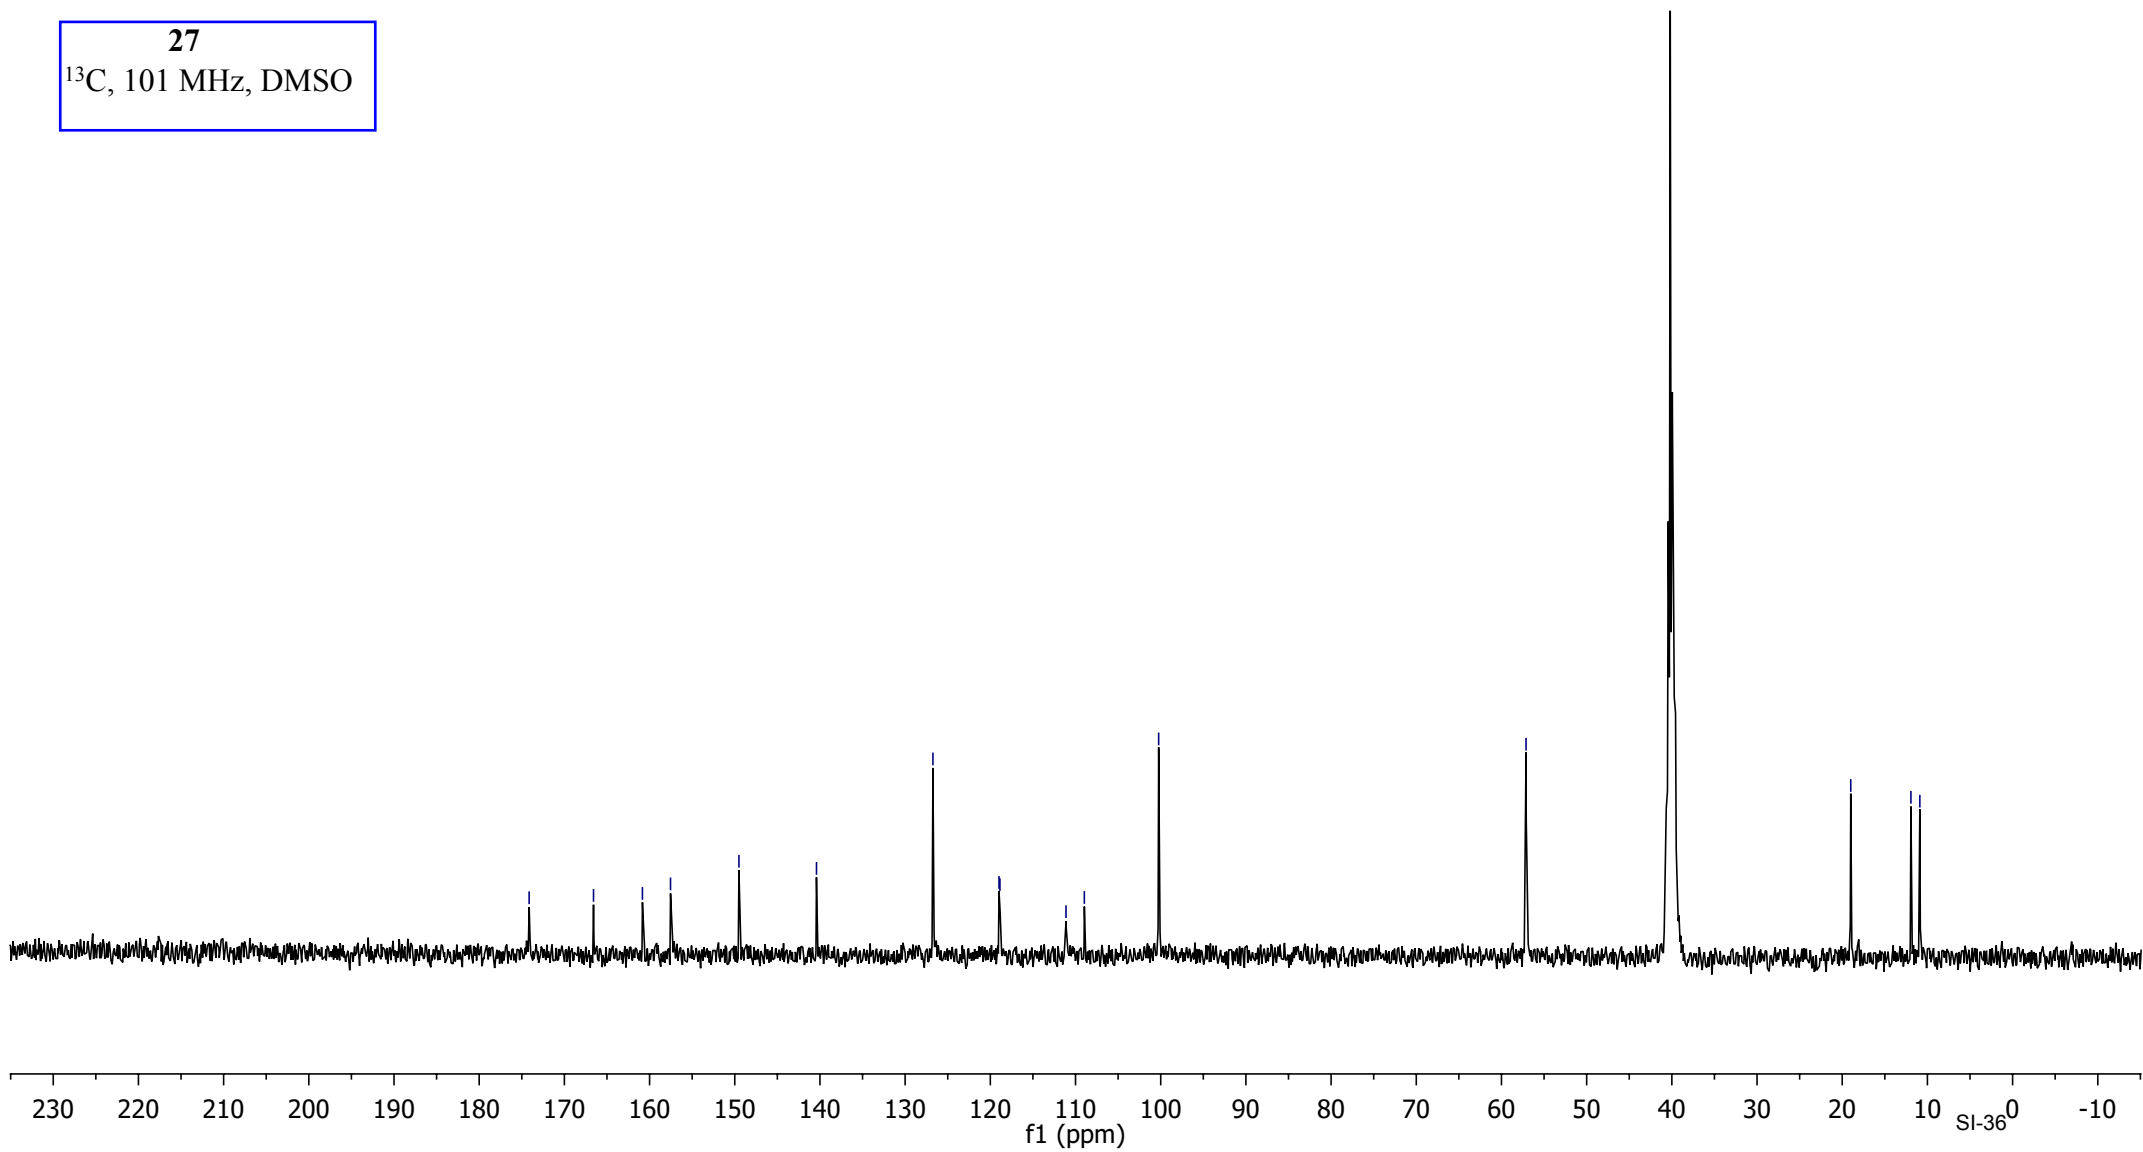

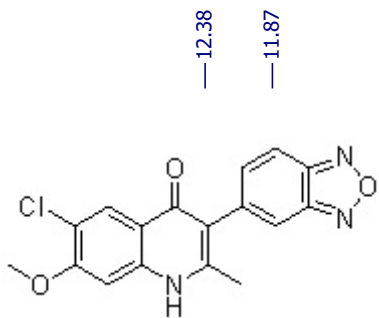

**28**  
 $^1\text{H}$ , 400 MHz, DMSO

12.38

11.87

8.01

8.00

7.97

7.90

7.51

7.49

7.08

3.97

2.35

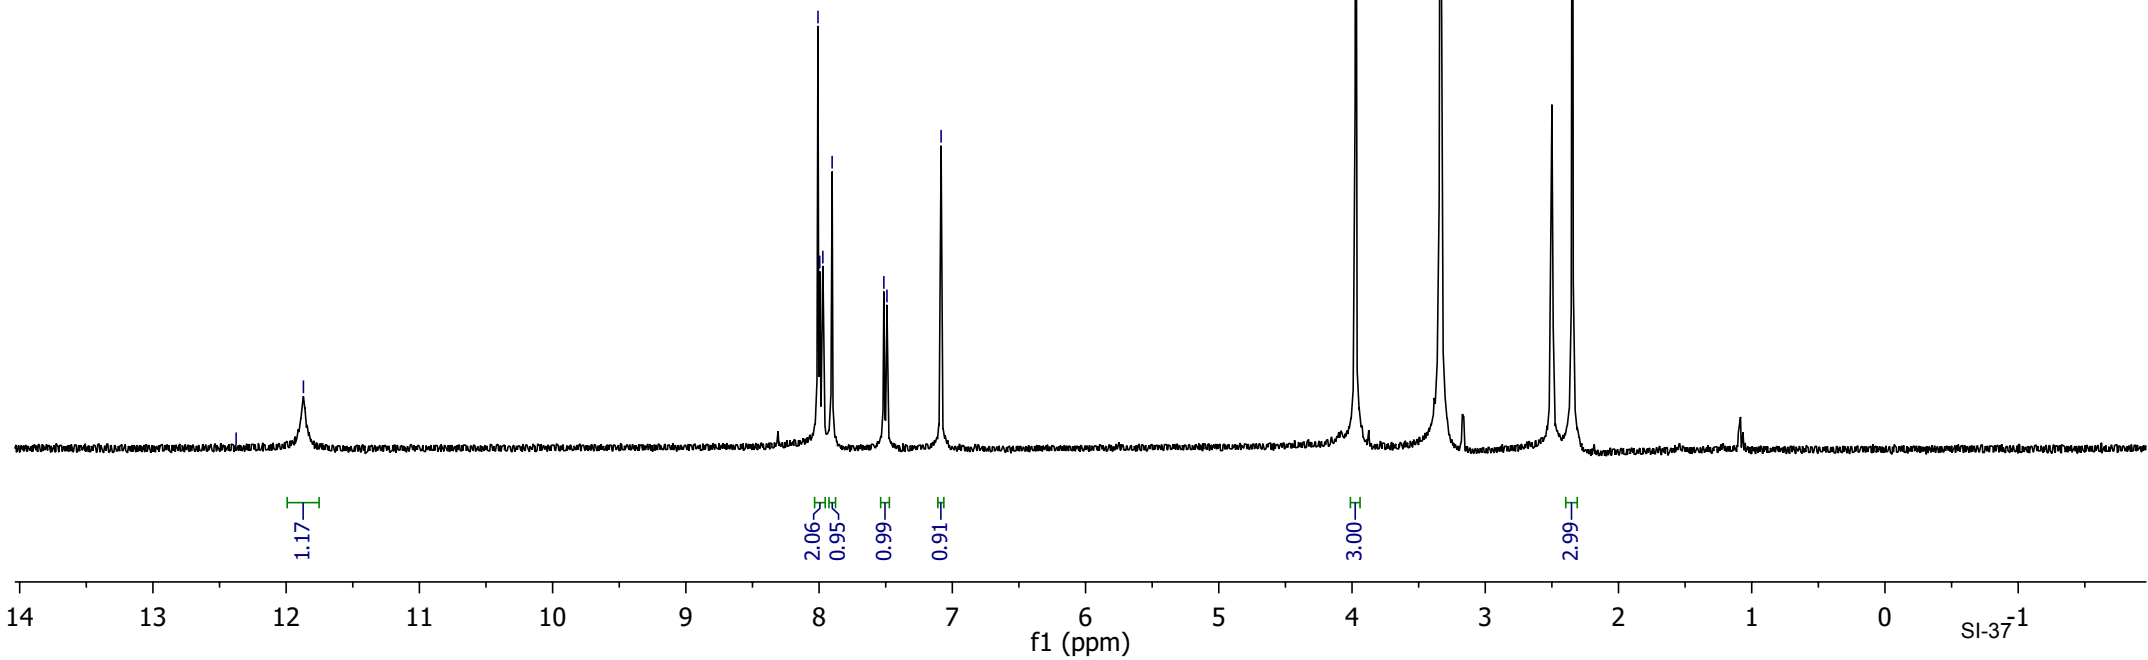

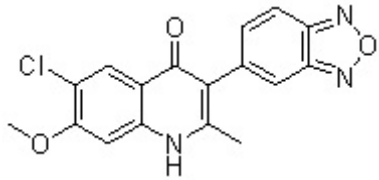

**28**

$^{13}\text{C}$ , 101 MHz, DMSO

— 173.29

— 156.99

— 149.19

— 148.10

— 147.73

— 140.84

— 139.64

— 137.44

— 132.57

— 125.99

— 118.63

— 118.52

— 116.11

— 114.31

— 99.61

— 56.48

— 18.87

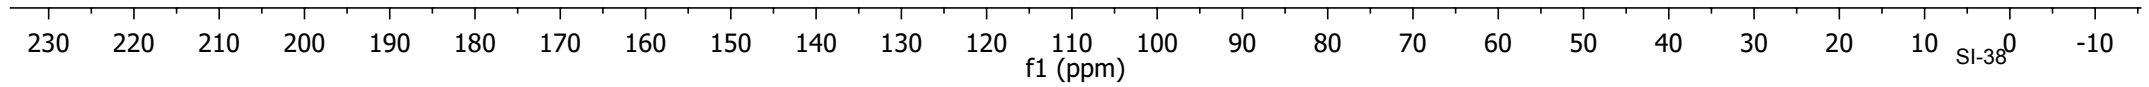

11.94

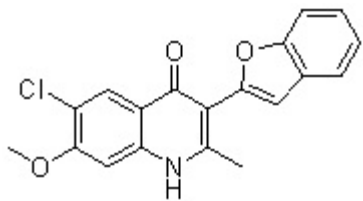

**29**

<sup>1</sup>H, 400 MHz, DMSO

8.06  
7.65  
7.64  
7.64  
7.55  
7.53  
7.29  
7.27  
7.25  
7.24  
7.24  
7.22  
7.09

3.97

2.56

0.73

0.85

0.95

1.00

2.94

1.00

3.00

3.00

12.0 11.5 11.0 10.5 10.0 9.5 9.0 8.5 8.0 7.5 7.0 6.5 6.0 5.5 5.0 4.5 4.0 3.5 3.0 2.5 2.0 1.5 1.0 0.5 0.0

f1 (ppm)

SI-39



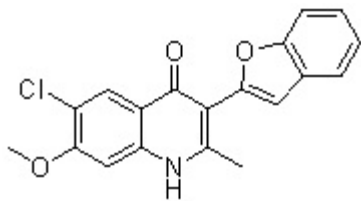

**29**

<sup>13</sup>C, 101 MHz, DMSO

—172.67

—156.95

—153.40

—151.64

—149.42

—139.08

—128.58

—126.15

—123.60

—122.59

—120.60

—118.73

—118.50

—110.67

—109.95

—106.91

—99.74

—56.44

—19.66

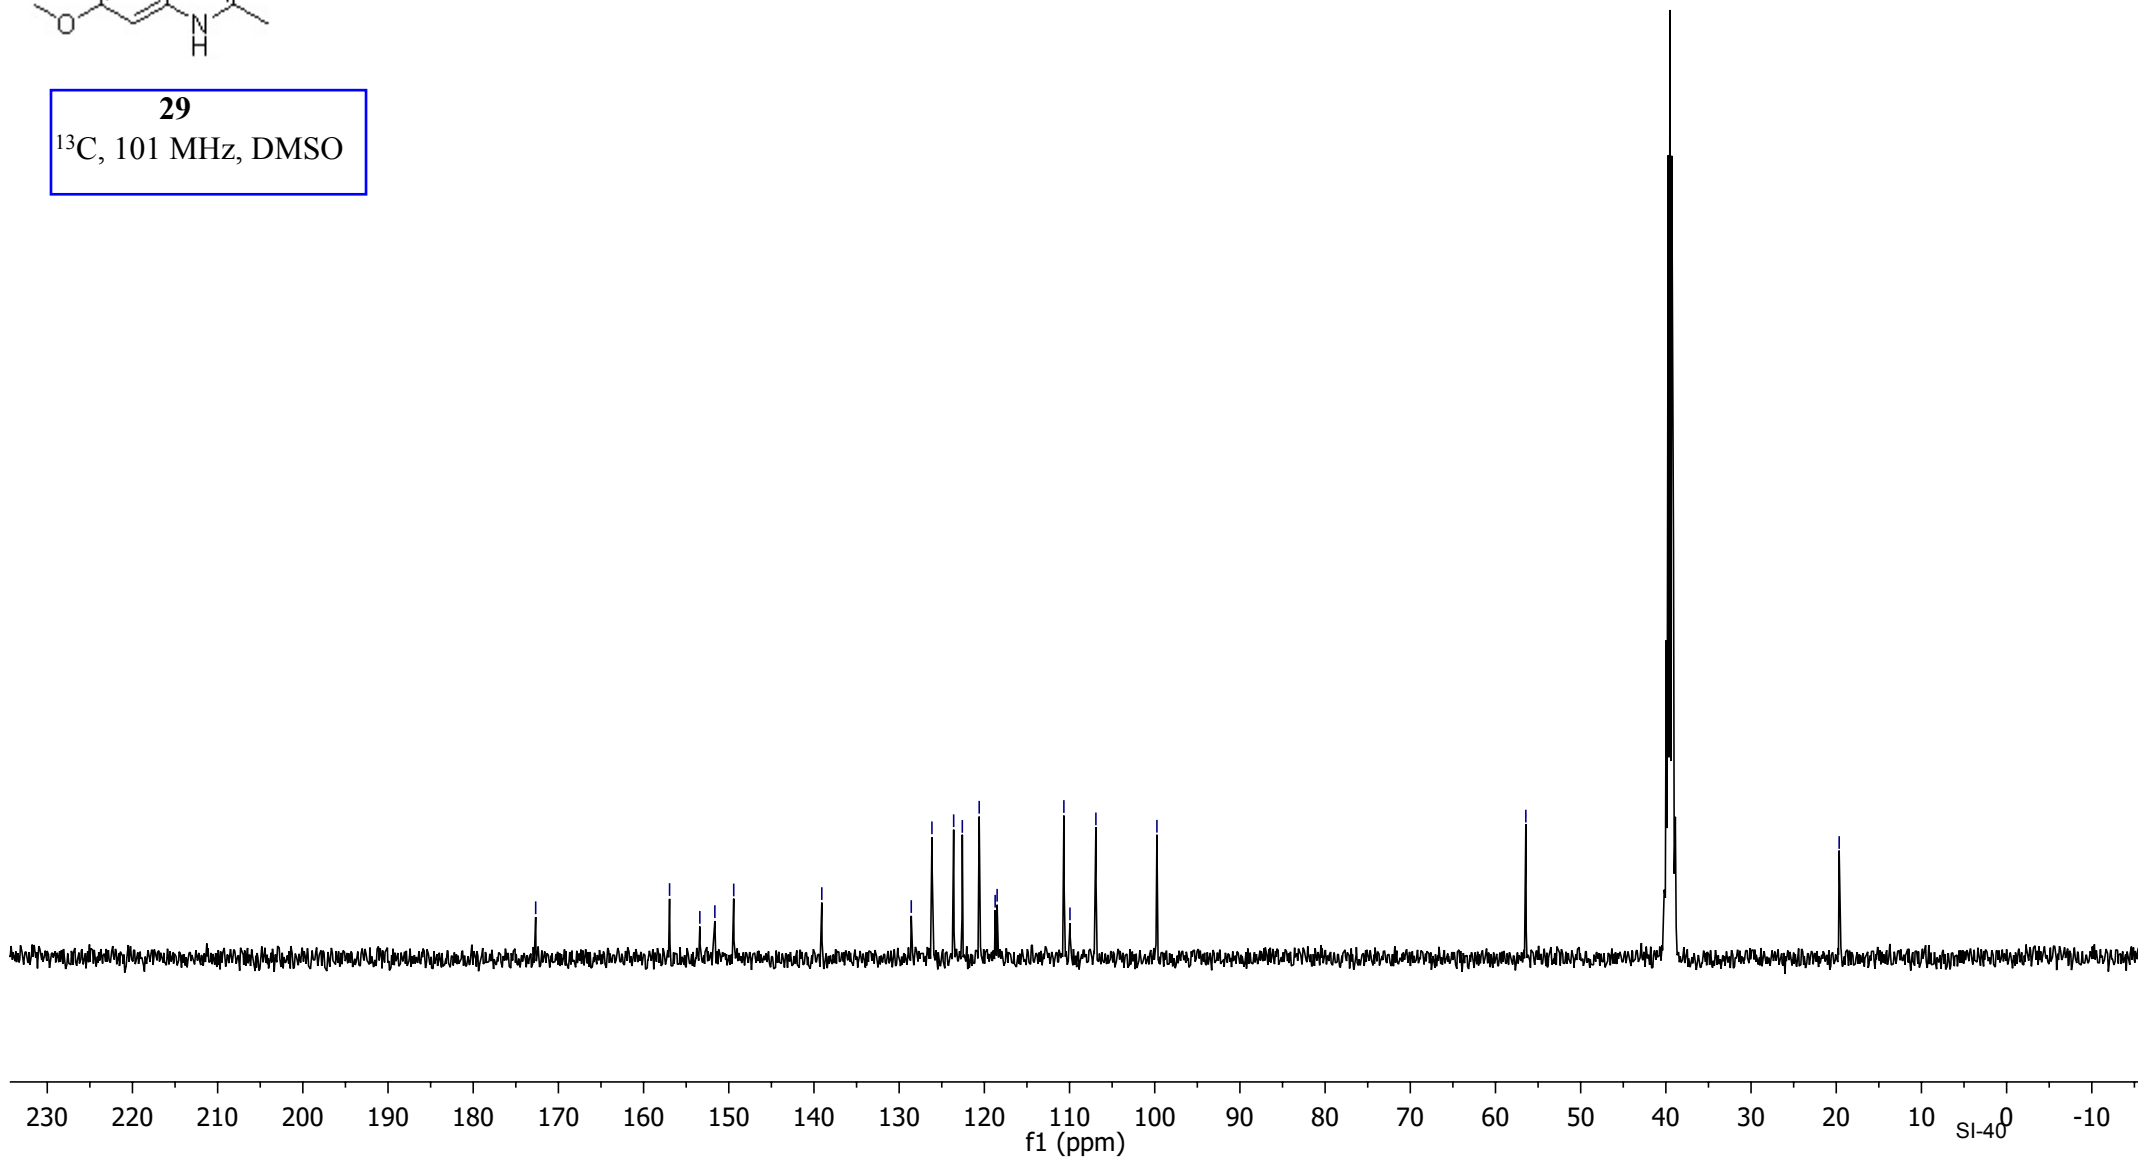

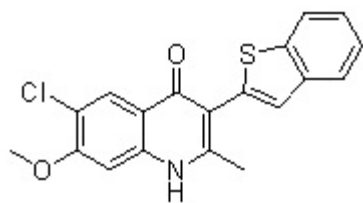

**30**

<sup>1</sup>H, 500 MHz, DMSO

11.91

8.04  
7.94  
7.92  
7.83  
7.81  
7.37  
7.36  
7.35  
7.34  
7.33  
7.32  
7.31  
7.09

3.98

2.47

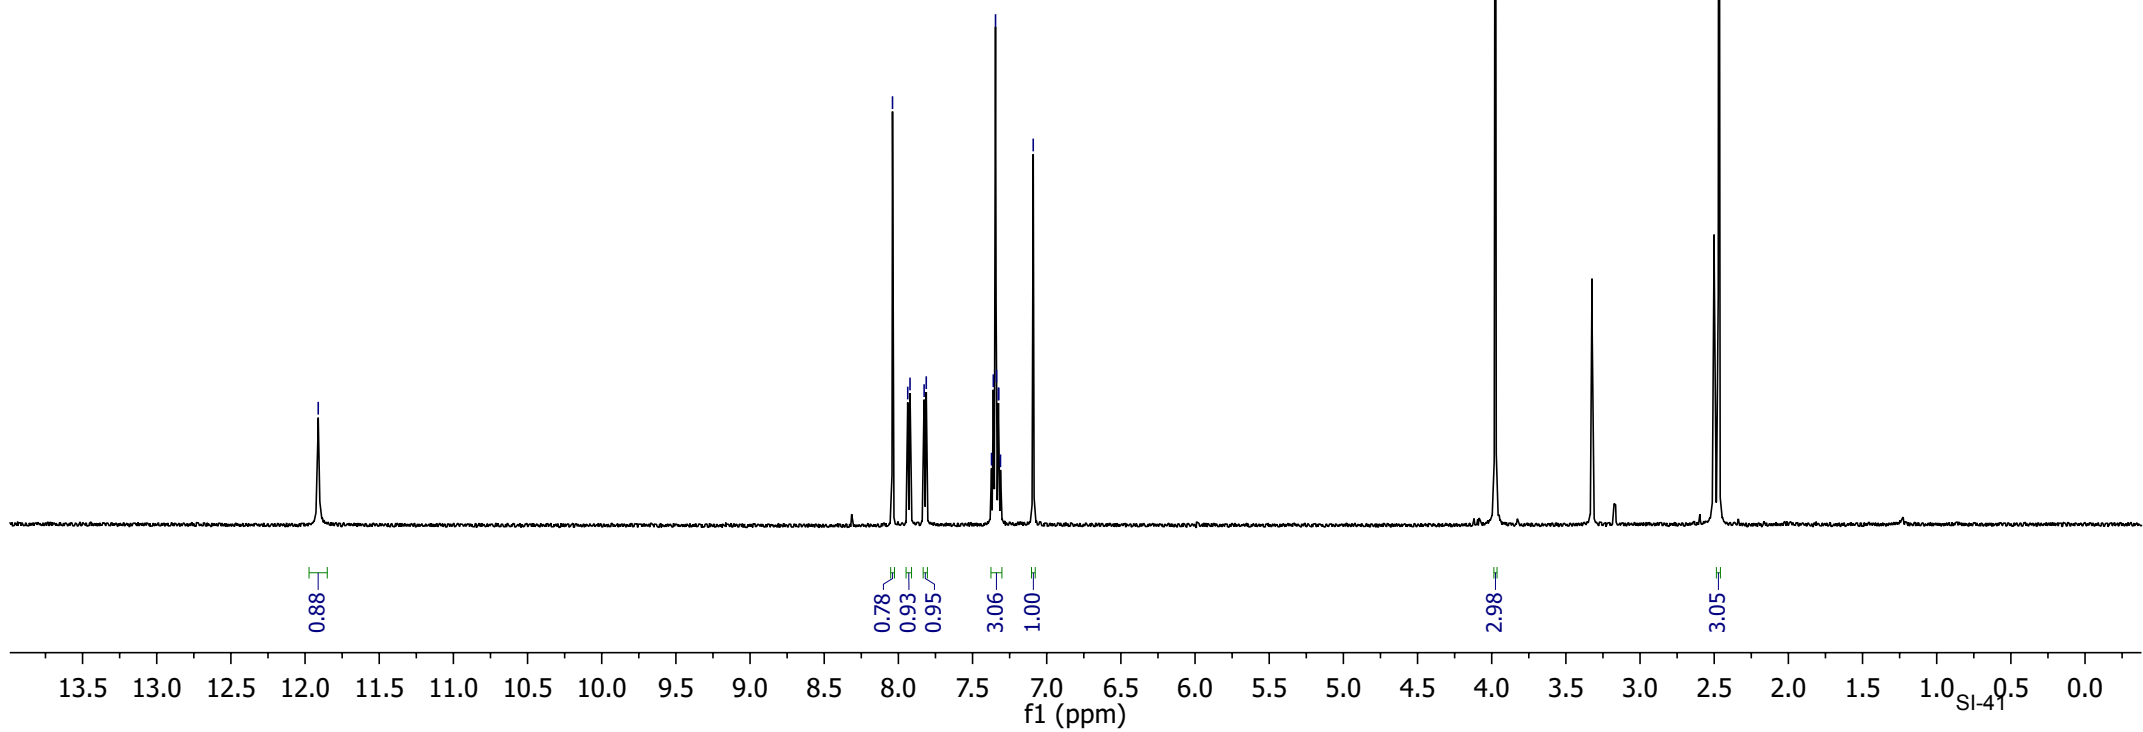



**30**

<sup>13</sup>C, 126 MHz, DMSO

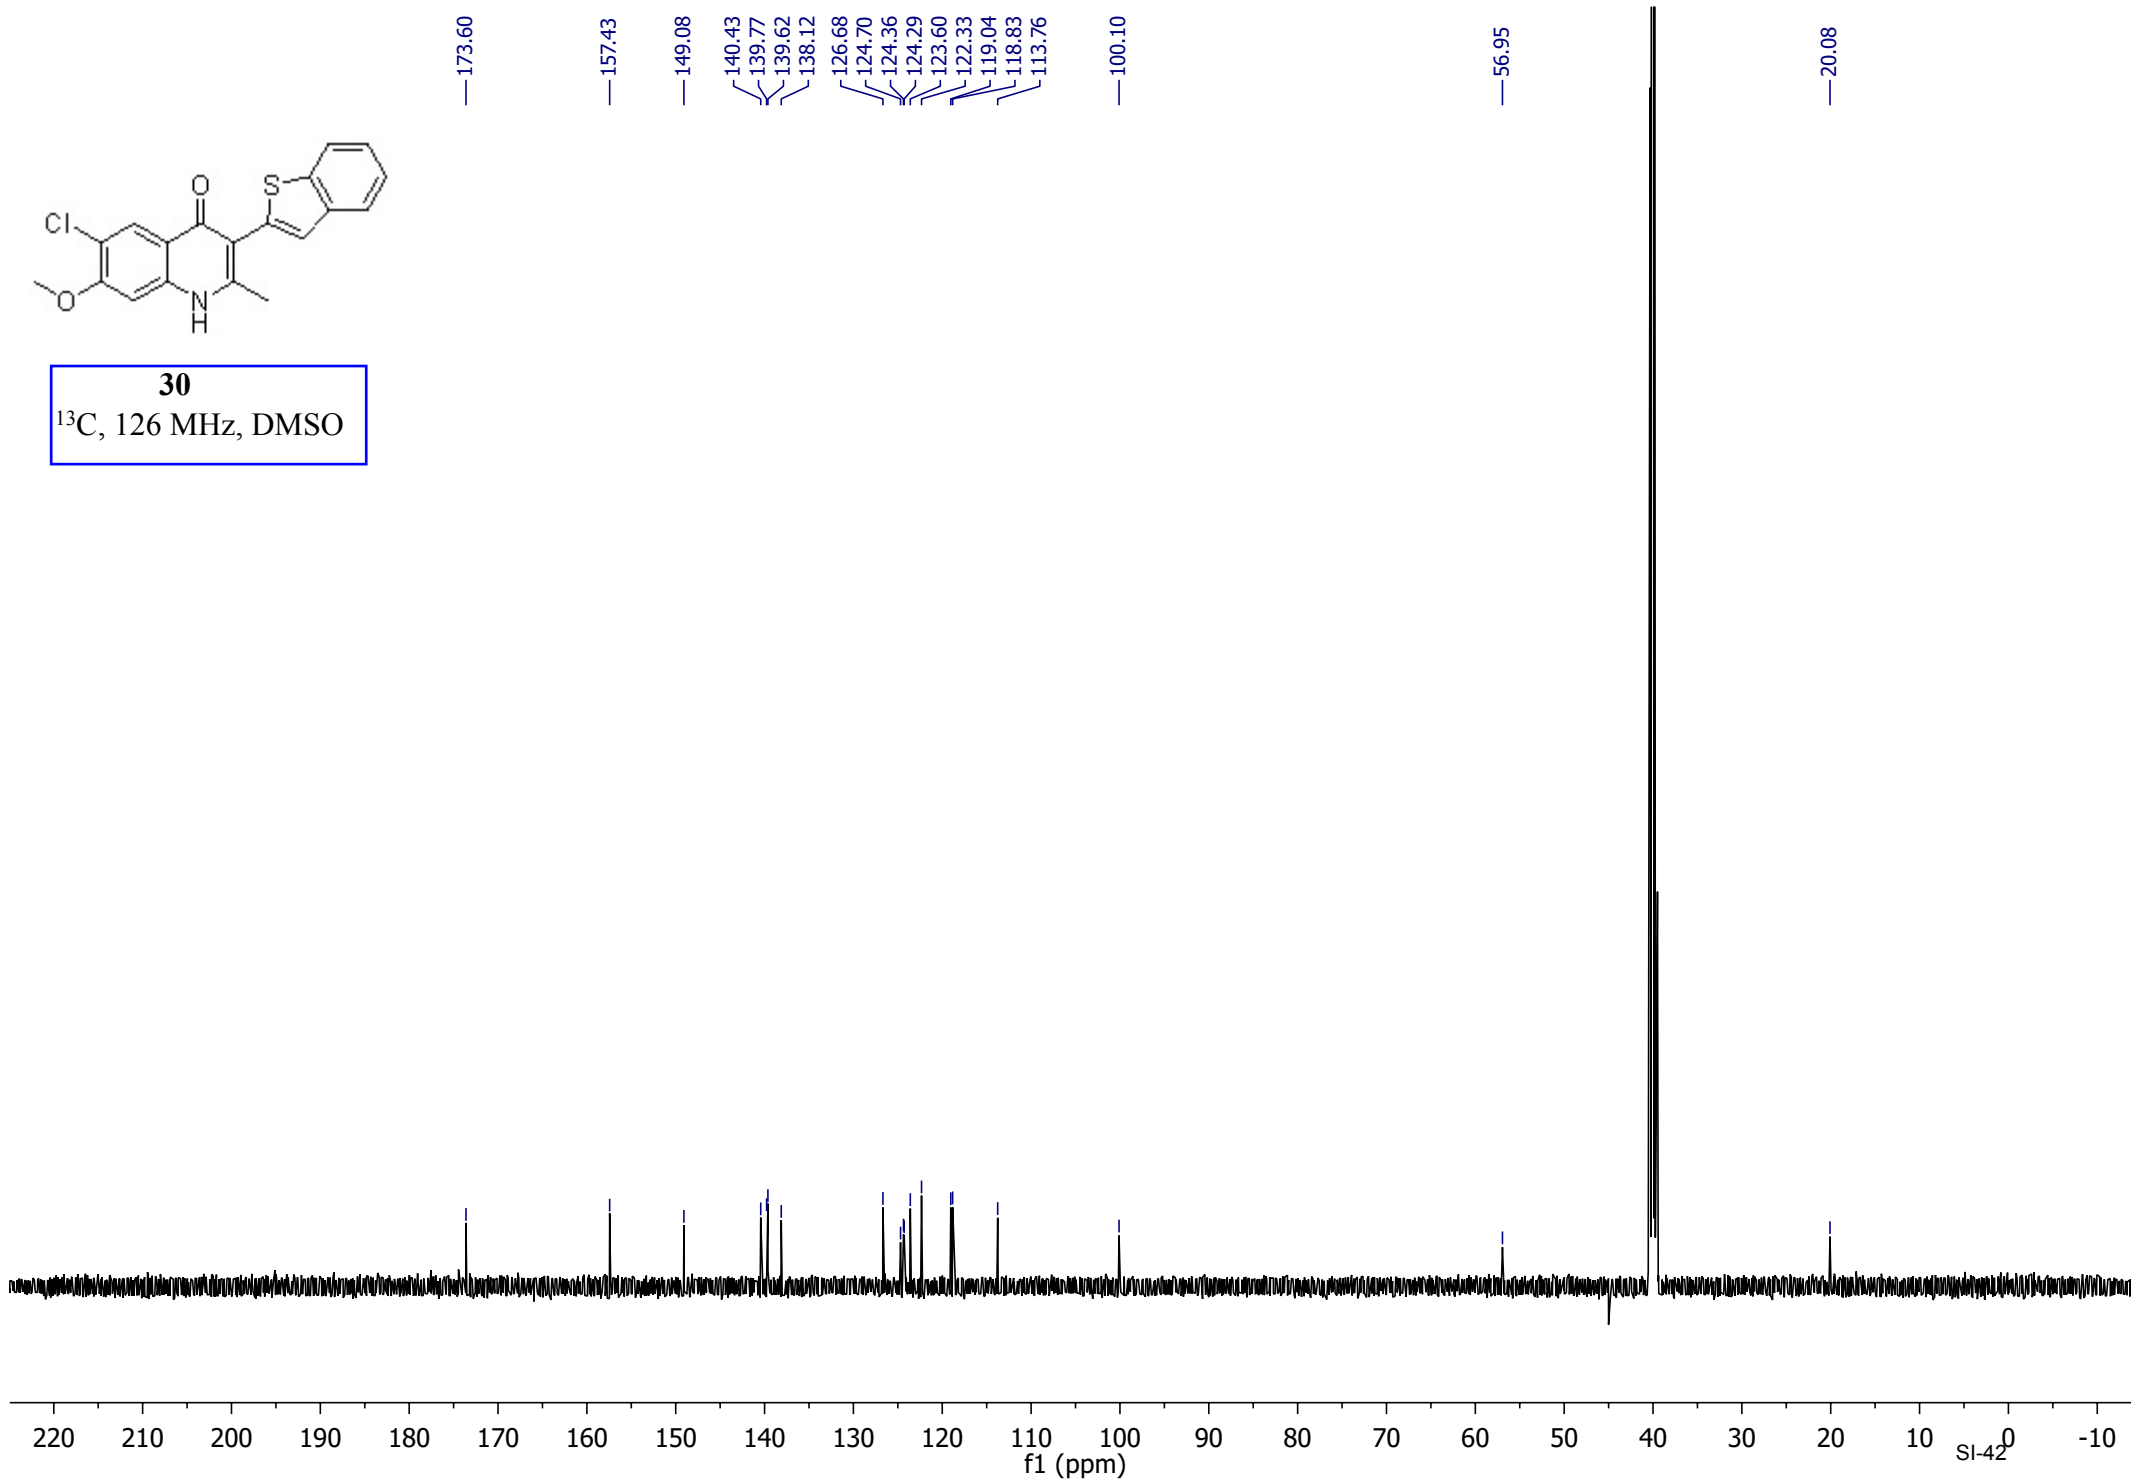

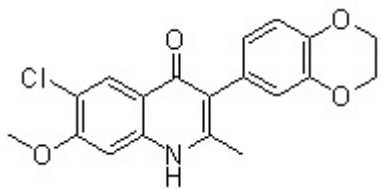

**31**

<sup>1</sup>H, 400 MHz, DMSO

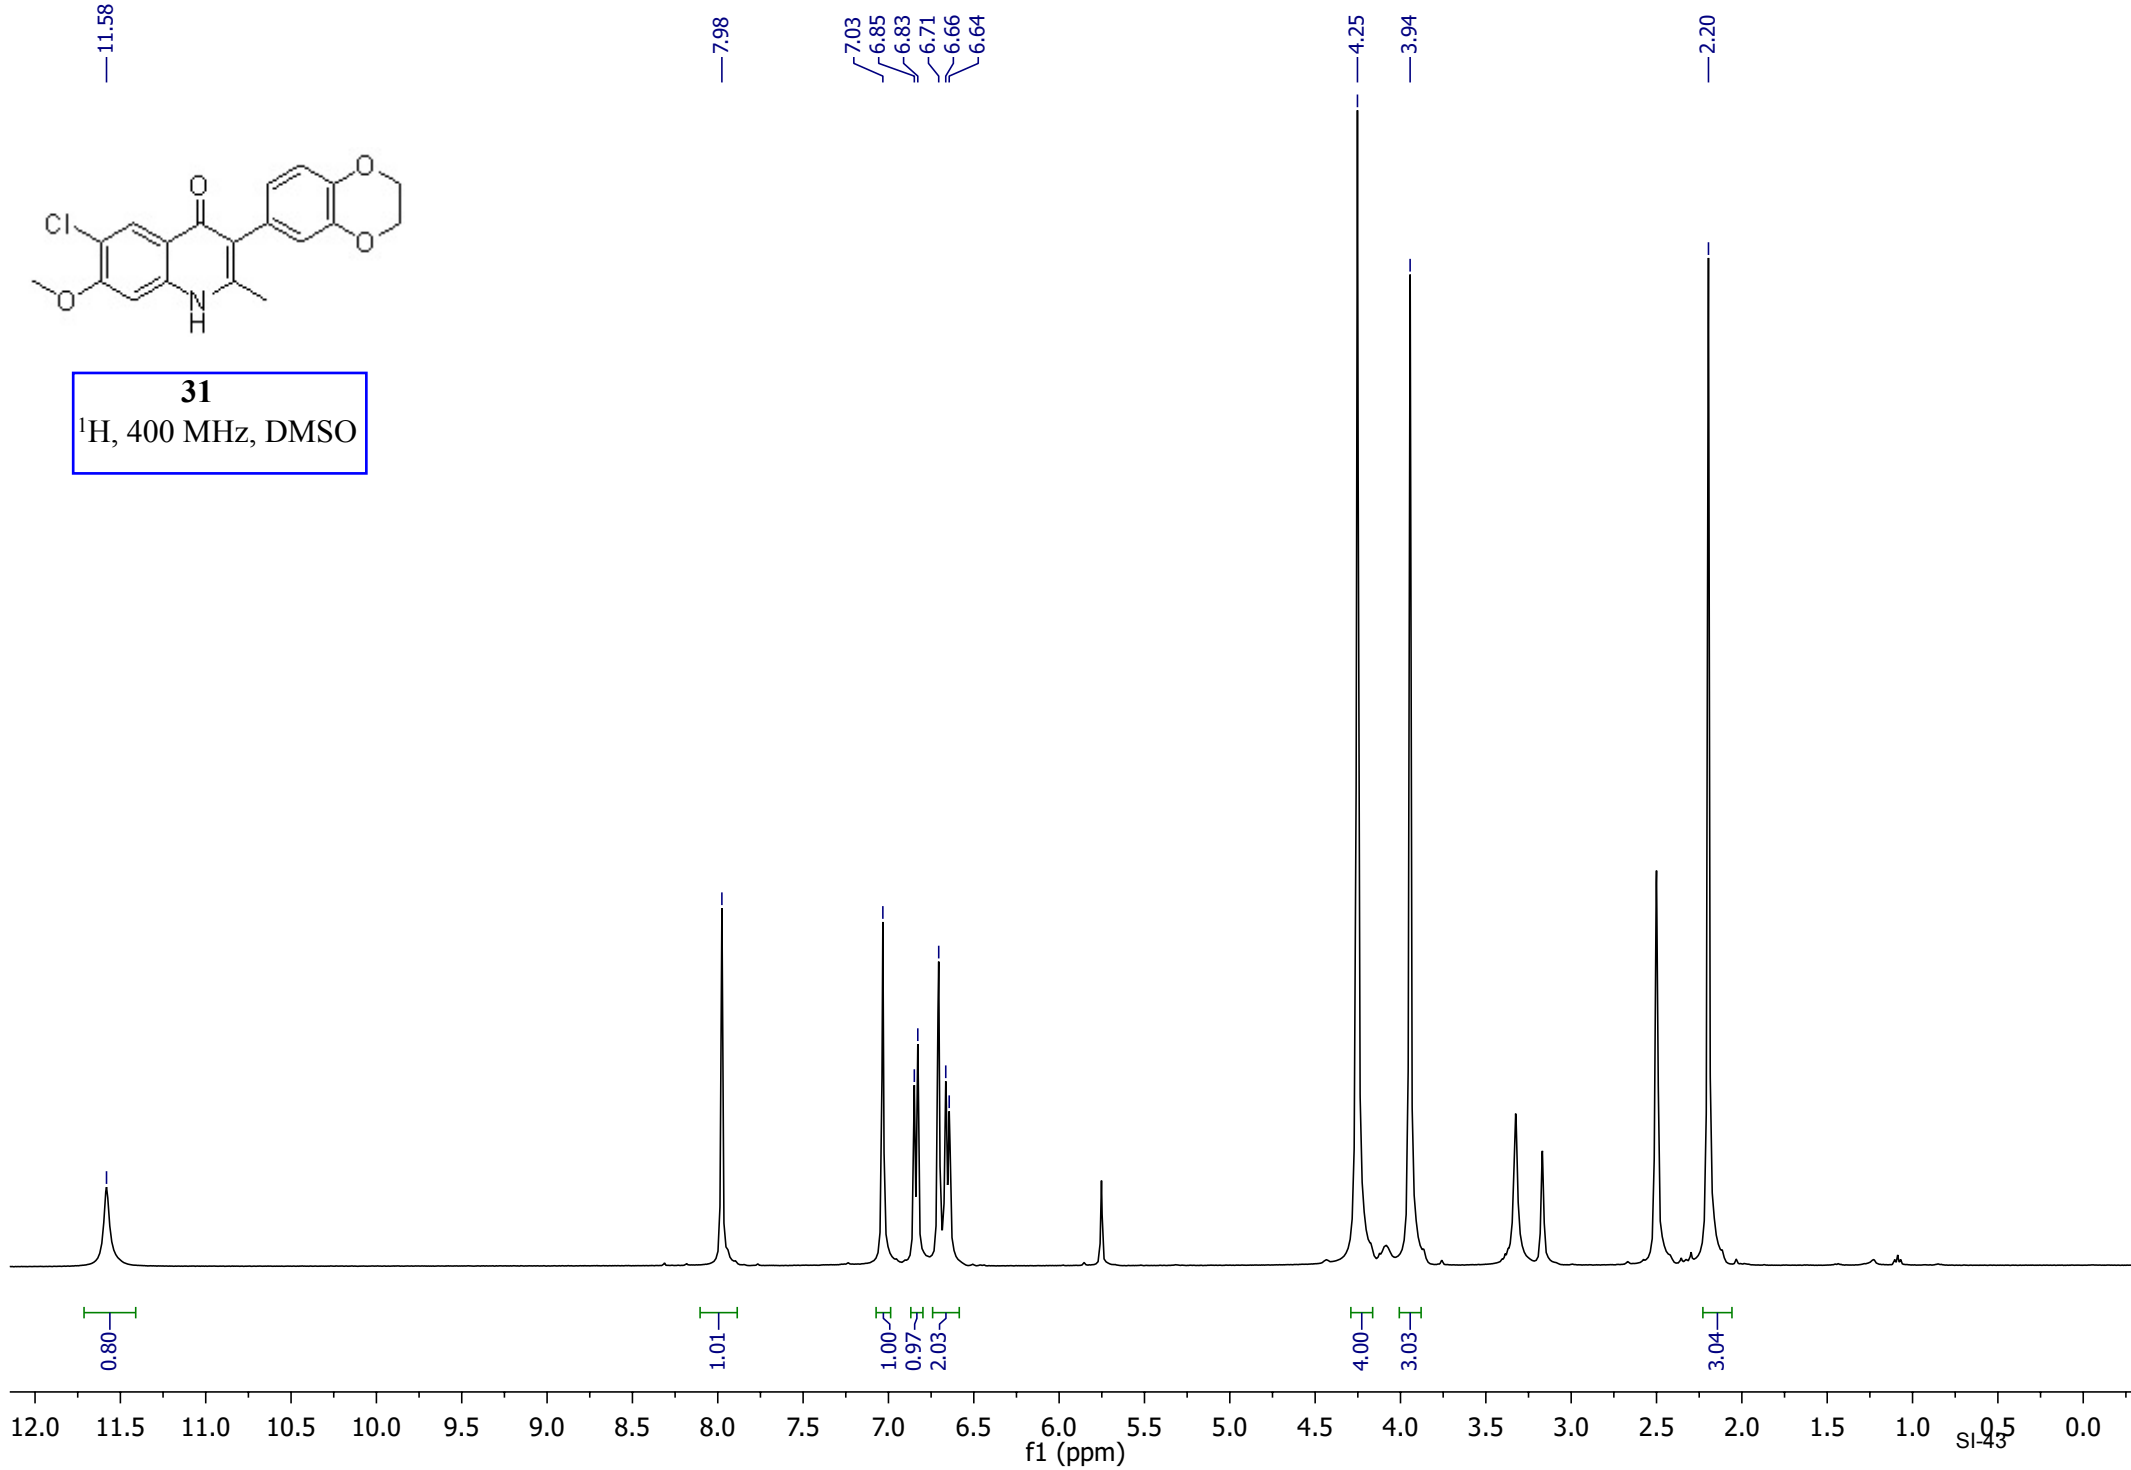

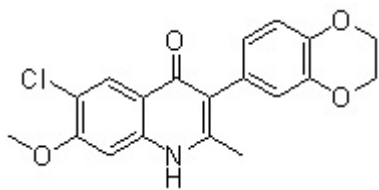

**31**  
<sup>13</sup>C, 101 MHz, DMSO

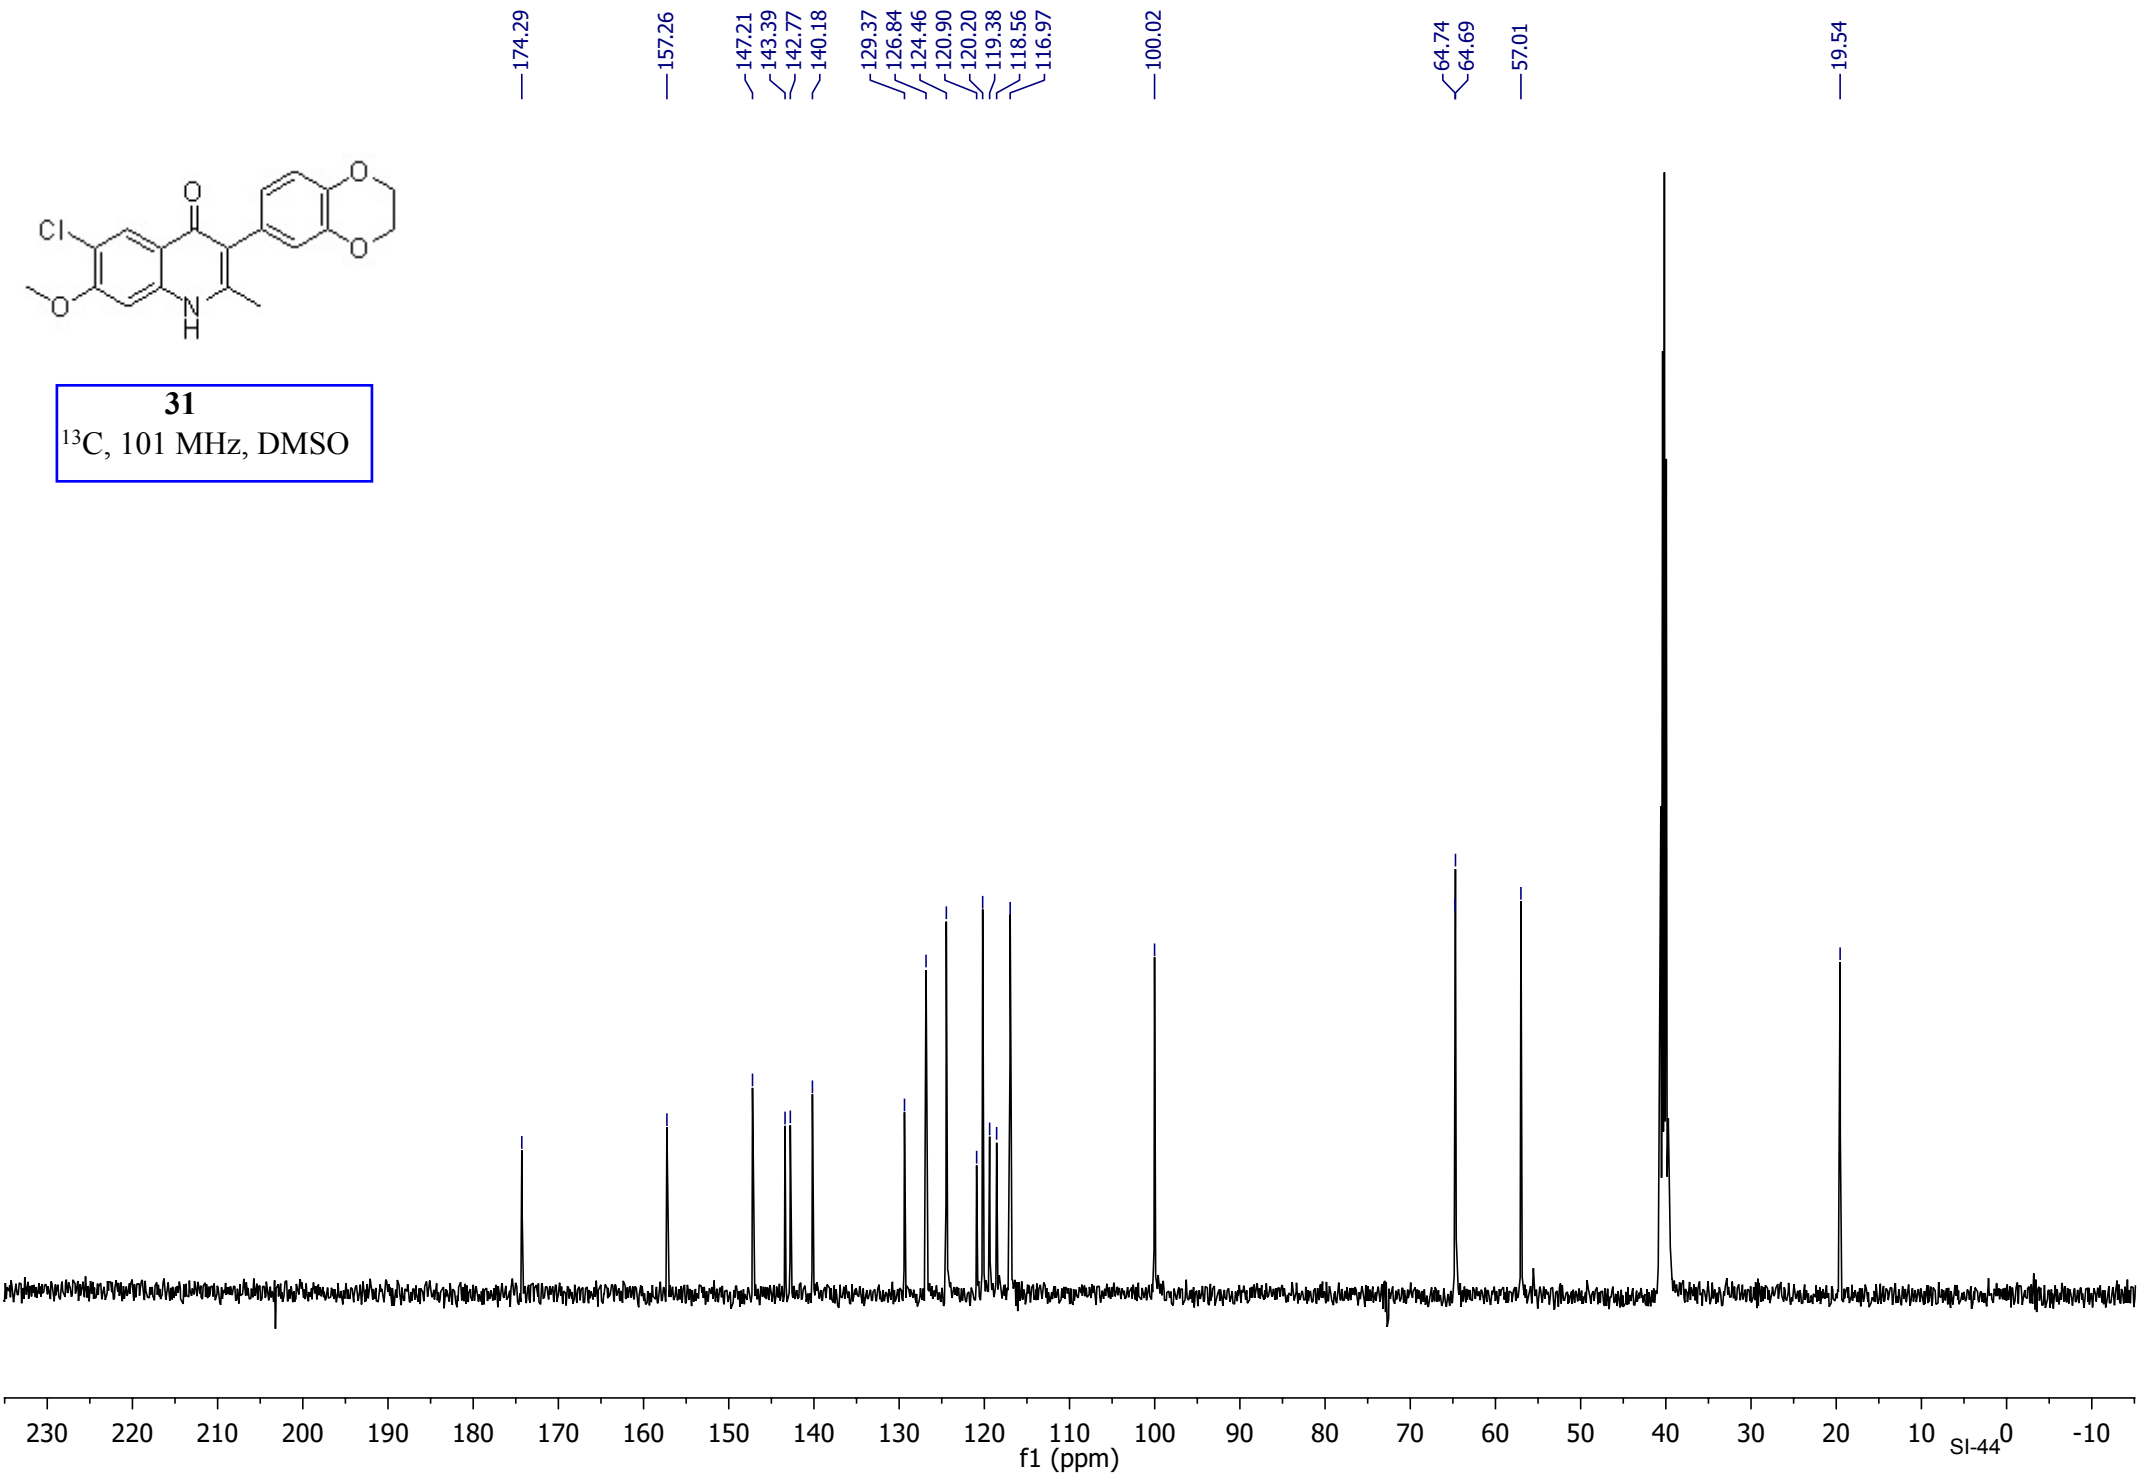

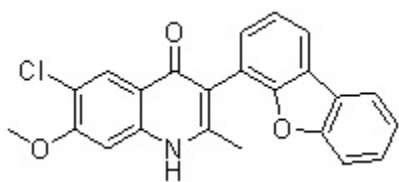

**32**  
<sup>1</sup>H, 400 MHz, DMSO

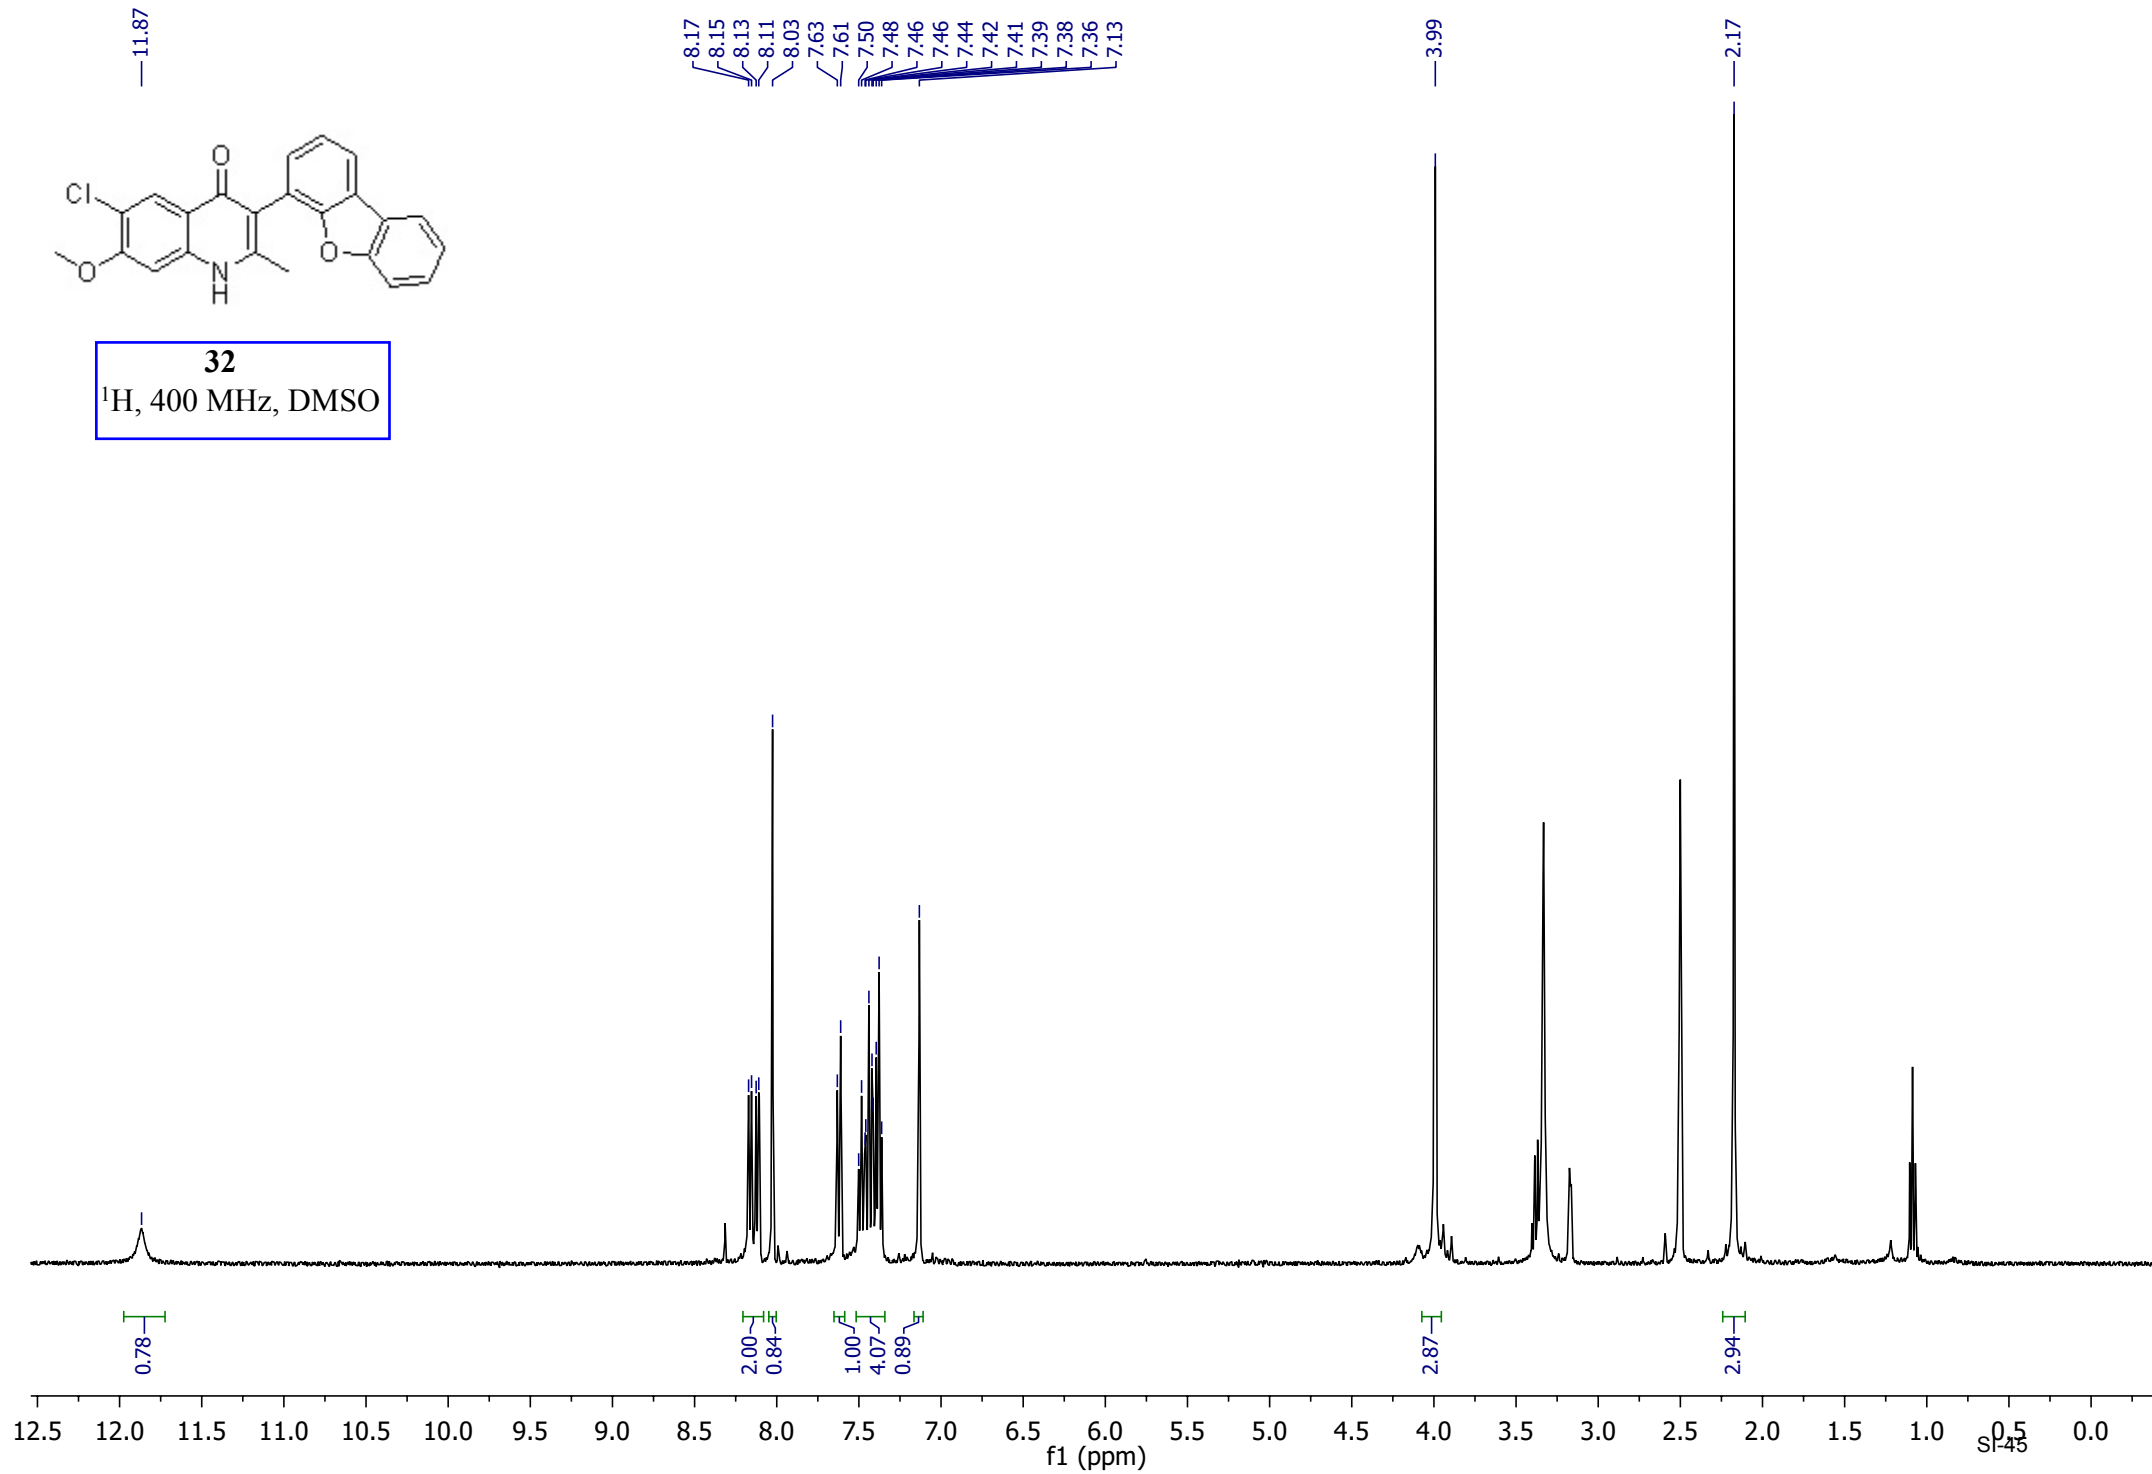



**32**

$^{13}\text{C}$ , 101 MHz, DMSO

— 173.27

— 156.84

— 155.22

— 154.07

— 147.61

— 139.81

— 130.28

— 127.35

— 126.15

— 123.86

— 123.45

— 122.95

— 122.81

— 121.04

— 120.42

— 119.95

— 118.60

— 118.25

— 115.37

— 111.63

— 99.60

— 56.44

— 18.62

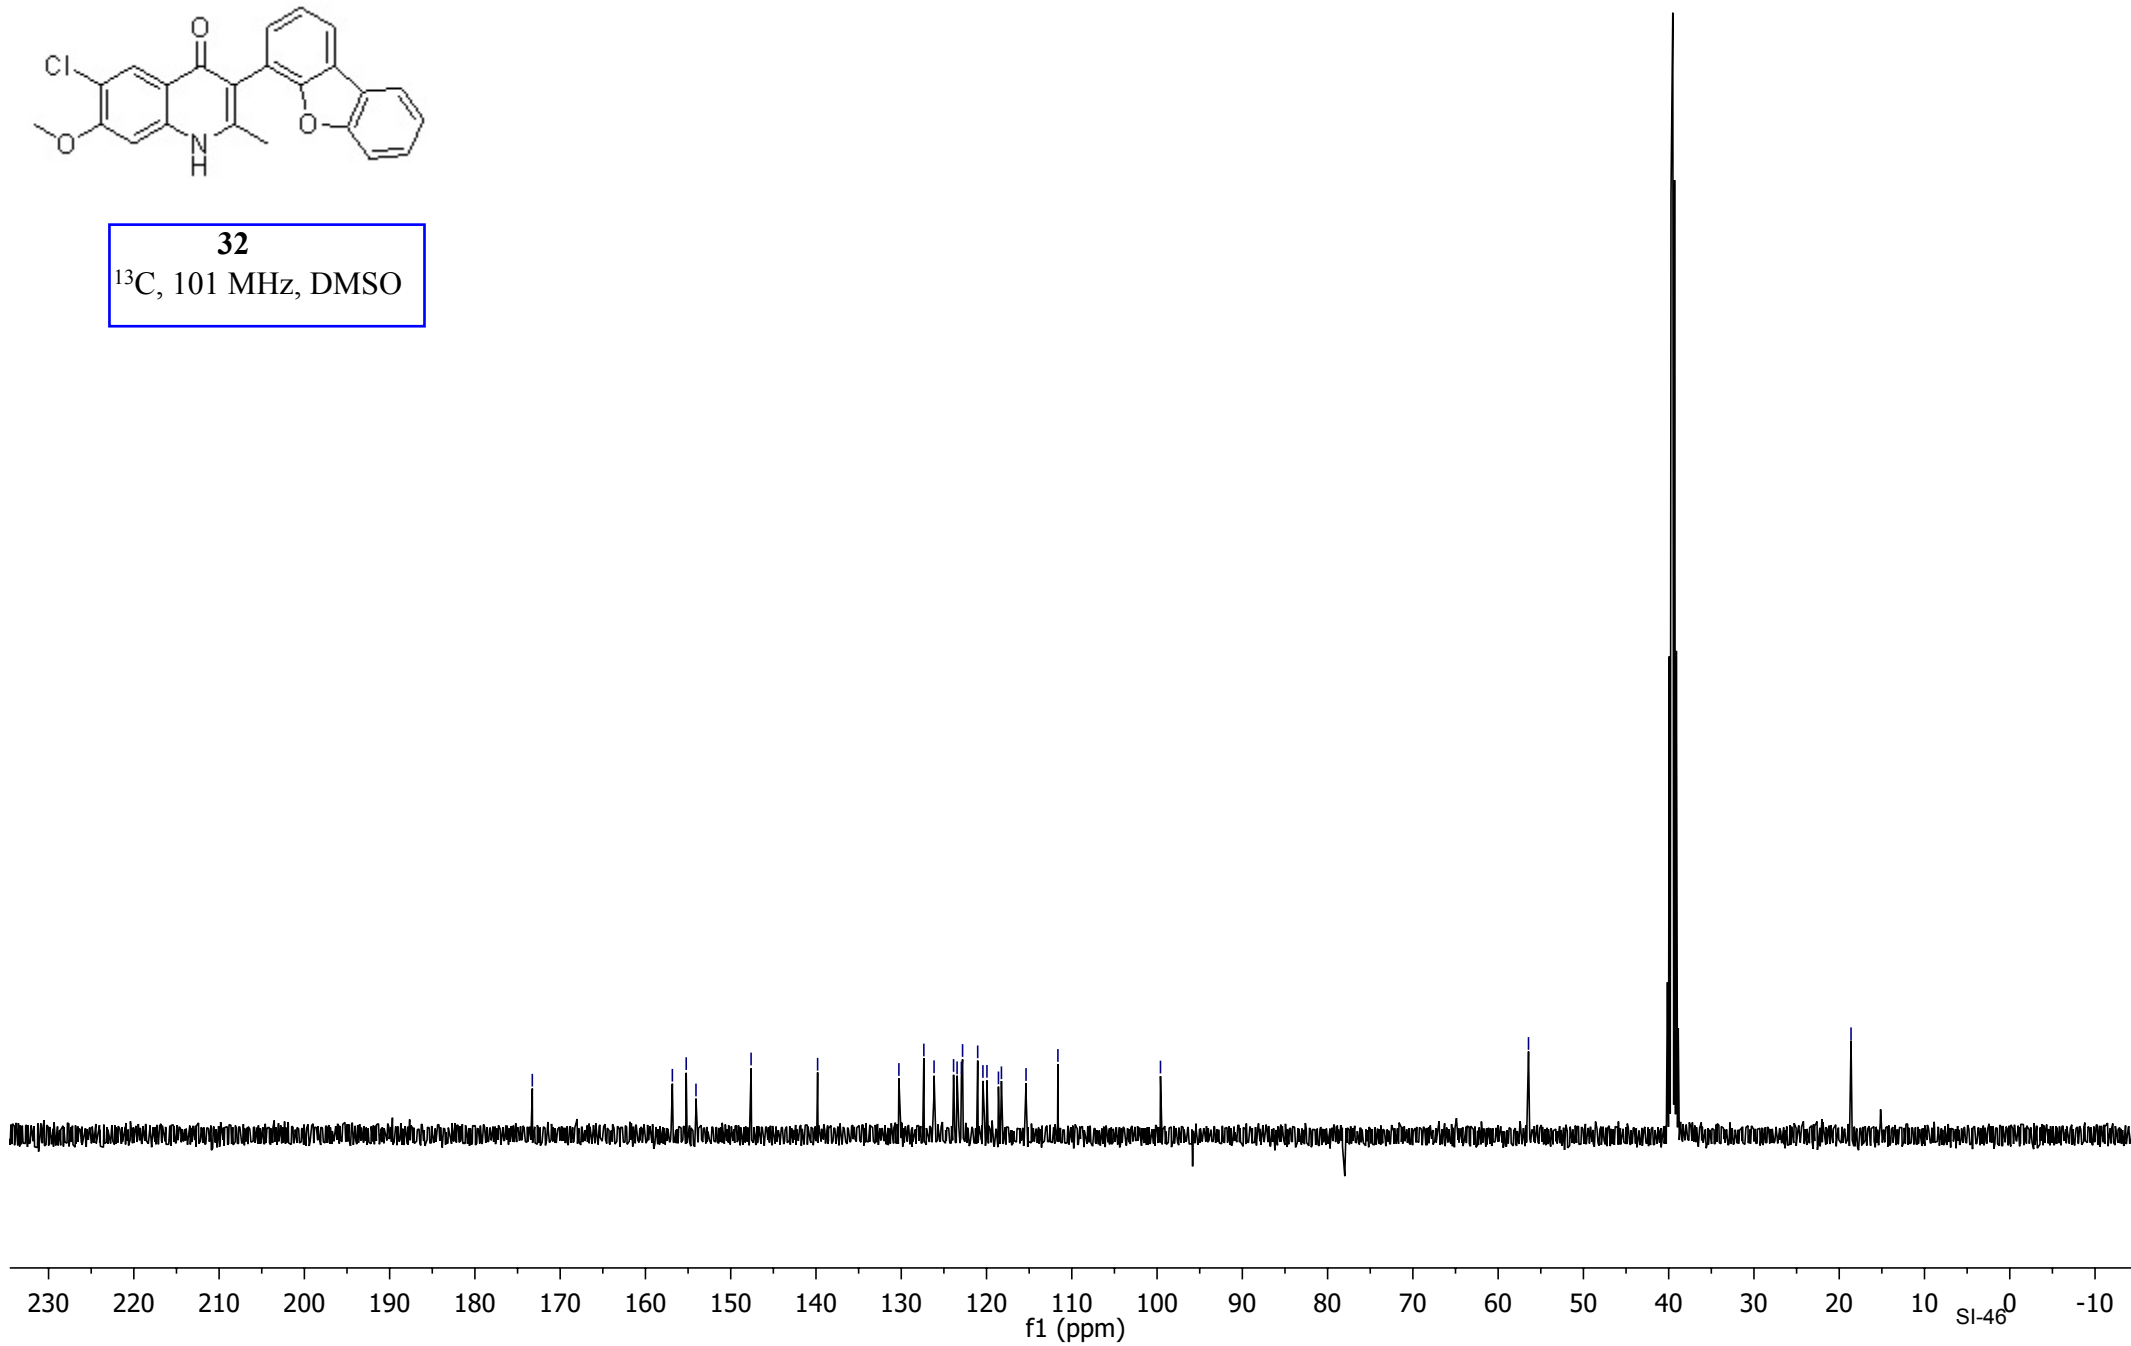

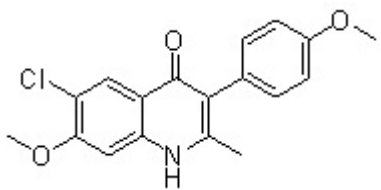

**33**  
<sup>1</sup>H, 400 MHz, DMSO

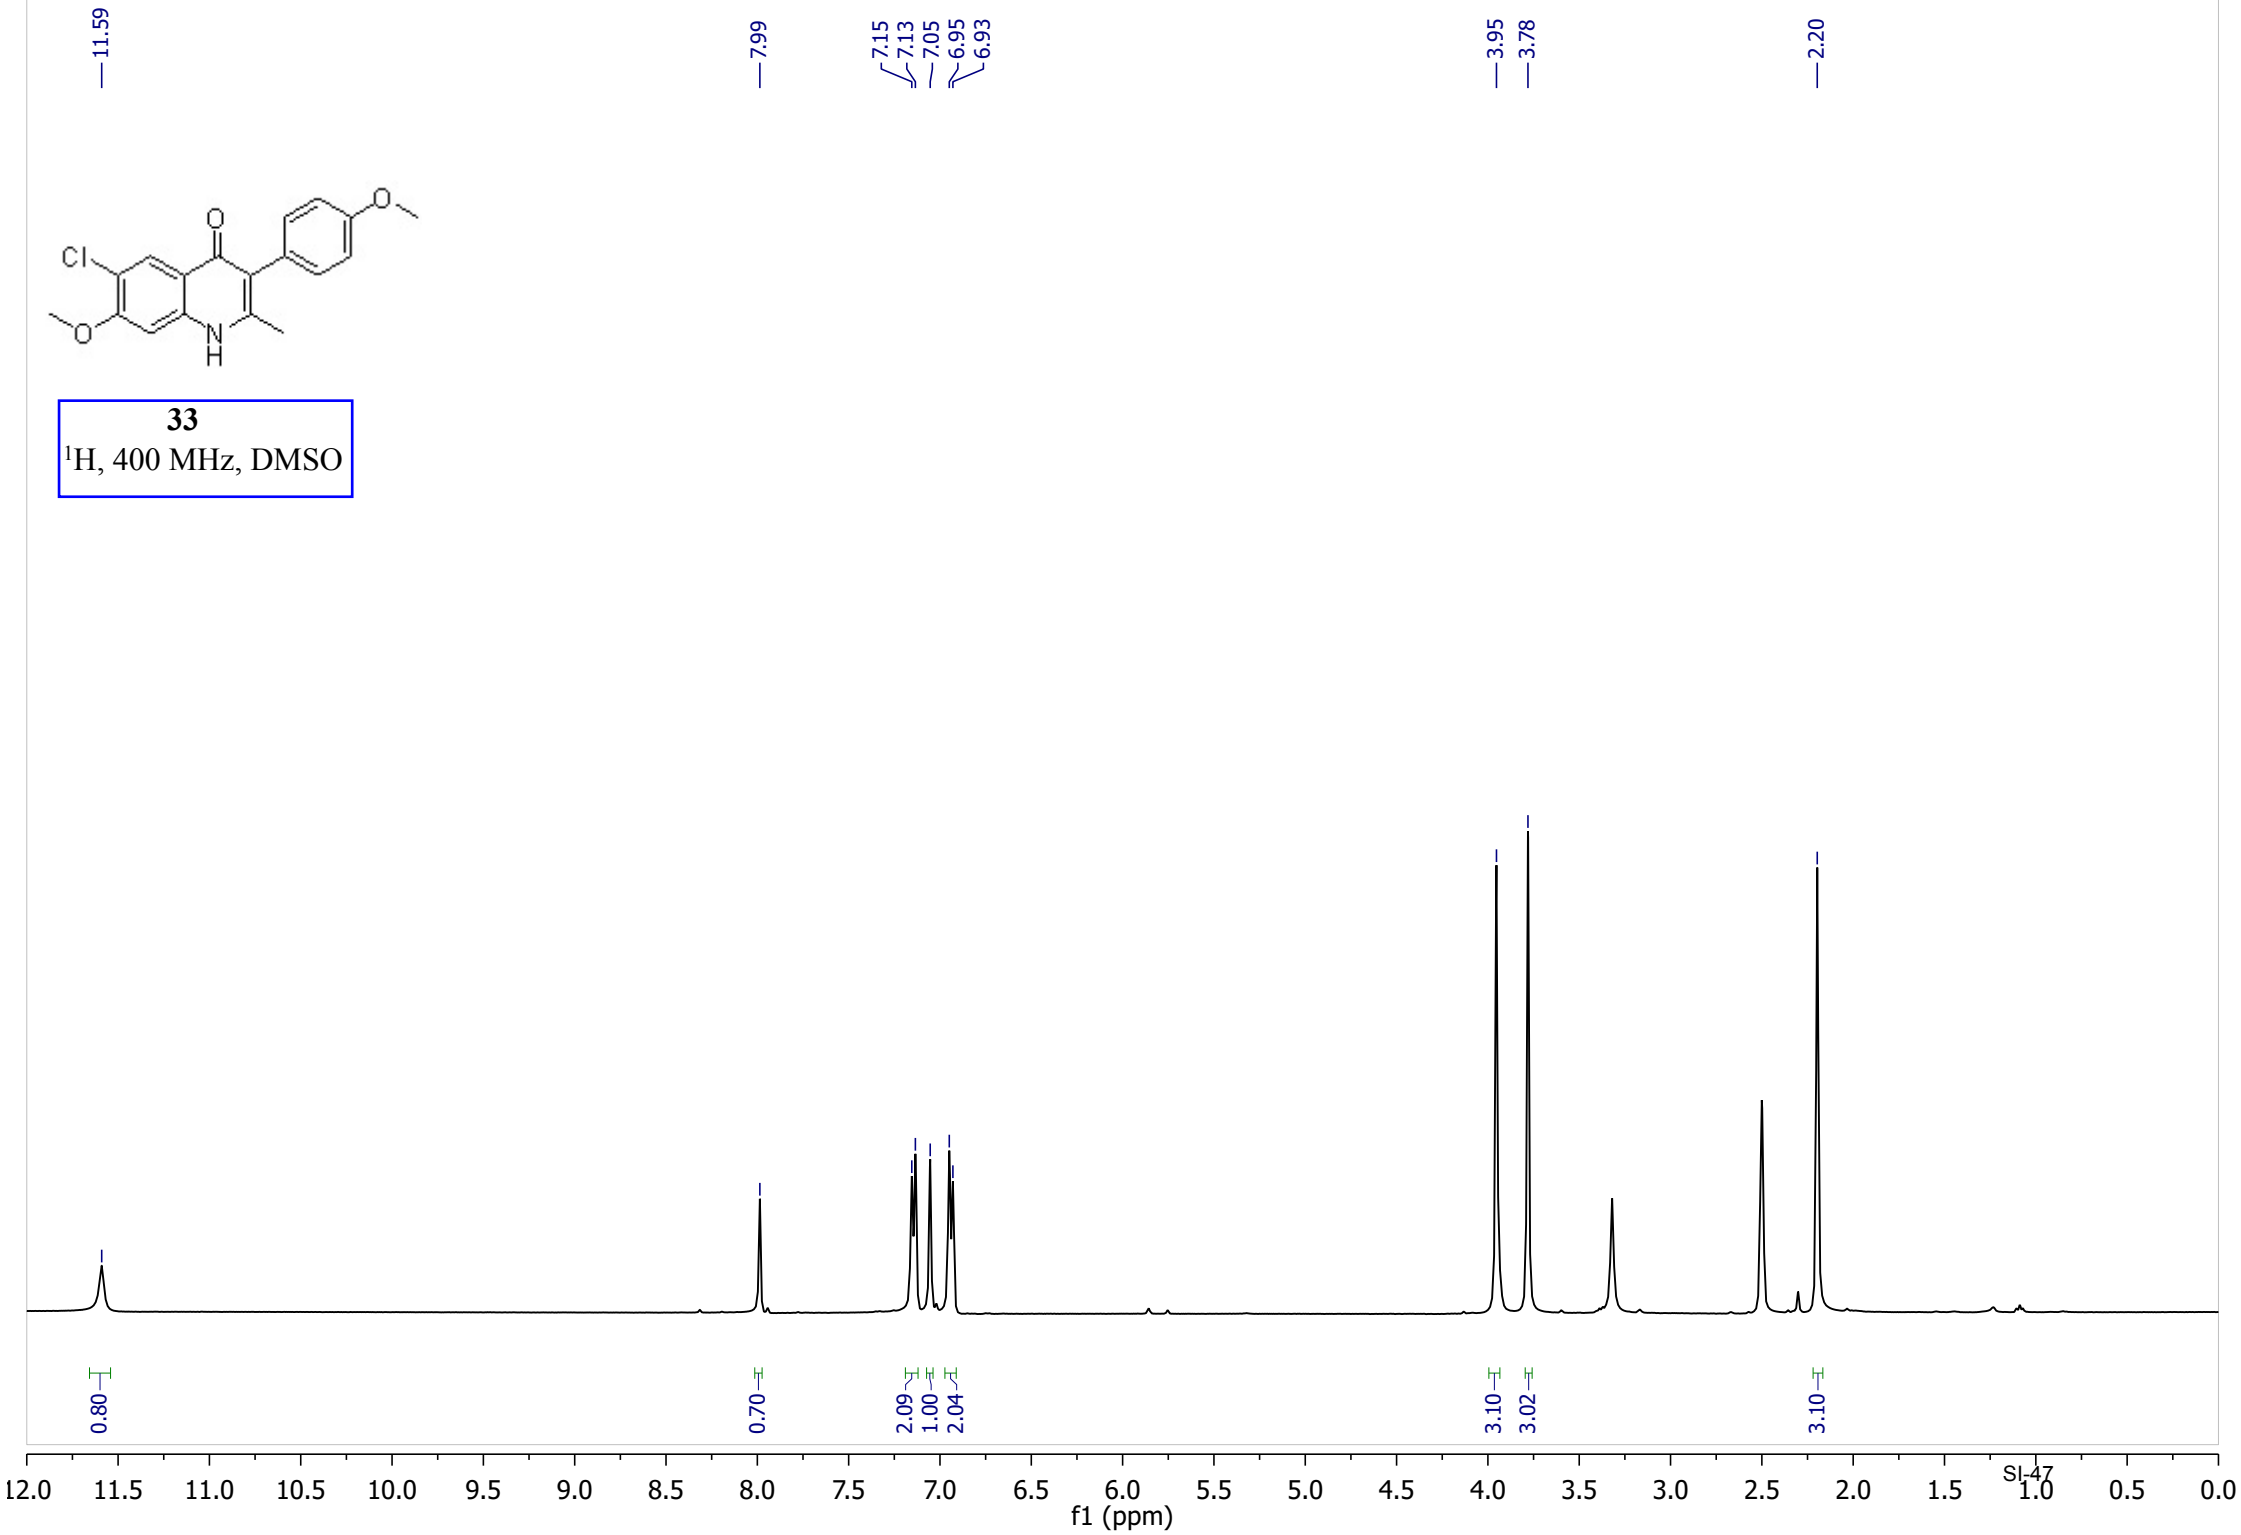



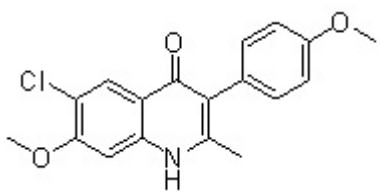

**33**  
 $^{13}\text{C}$ , 101 MHz, DMSO

— 173.73  
~ 157.92  
~ 156.61  
— 146.46  
— 139.55  
~ 131.99  
~ 127.82  
~ 126.21  
~ 120.39  
~ 118.74  
~ 117.88  
~ 113.25  
— 99.38  
~ 56.37  
~ 55.01  
— 18.90

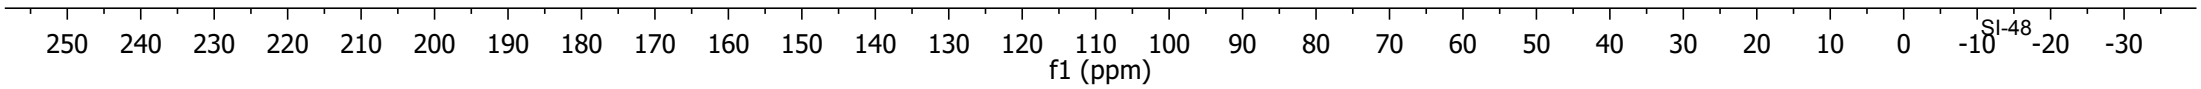

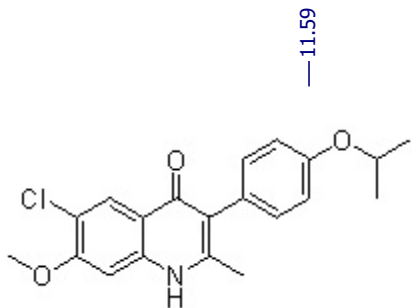

**34**  
<sup>1</sup>H, 500 MHz, DMSO

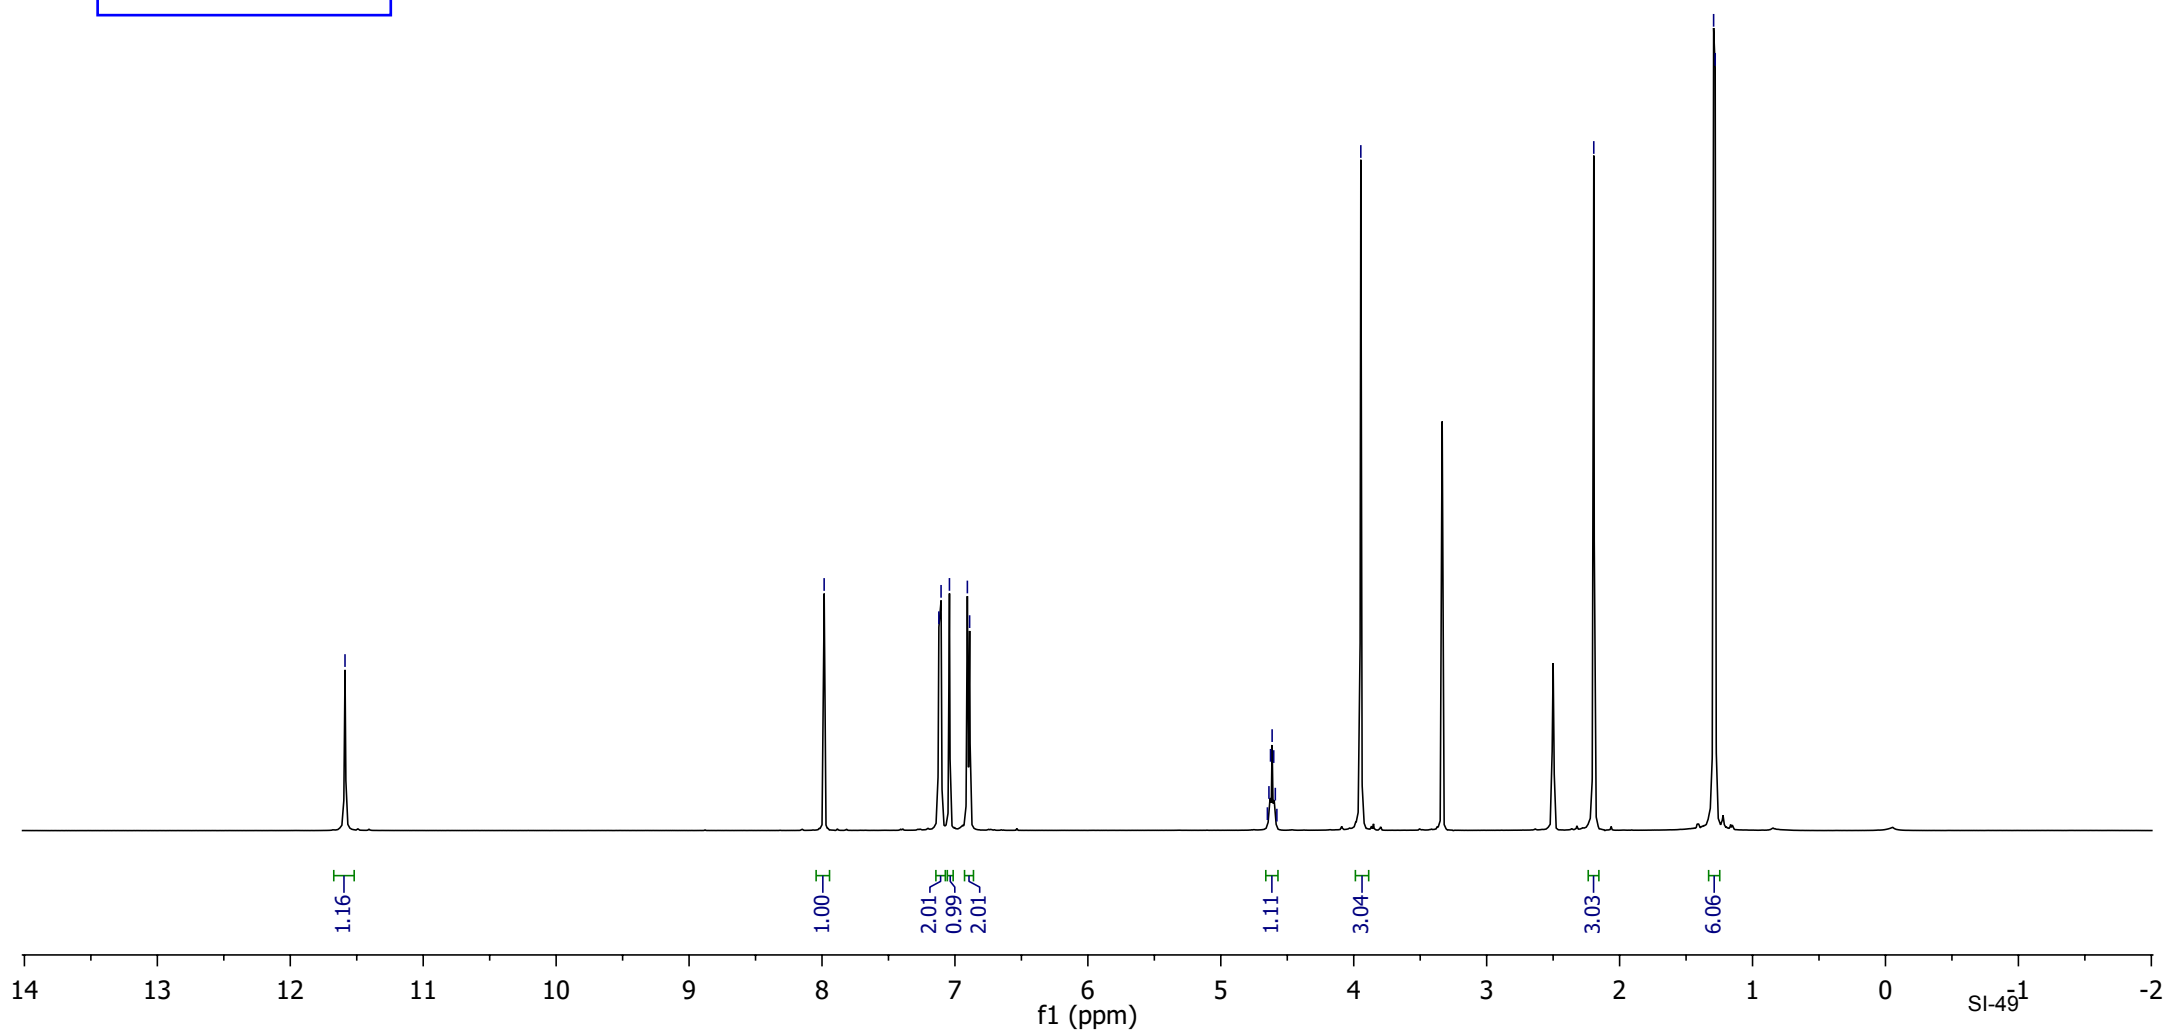

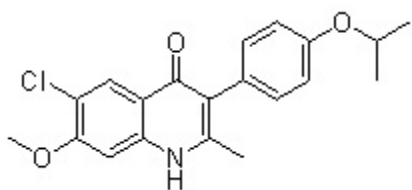

**34**  
<sup>13</sup>C, 126 MHz, DMSO

- 173.70
- 156.58
- 156.10
- 146.41
- 139.53
- 132.02
- 127.51
- 126.19
- 120.41
- 118.72
- 117.83
- 114.77
- 99.35
- 68.95
- 56.35
- 21.94
- 18.92

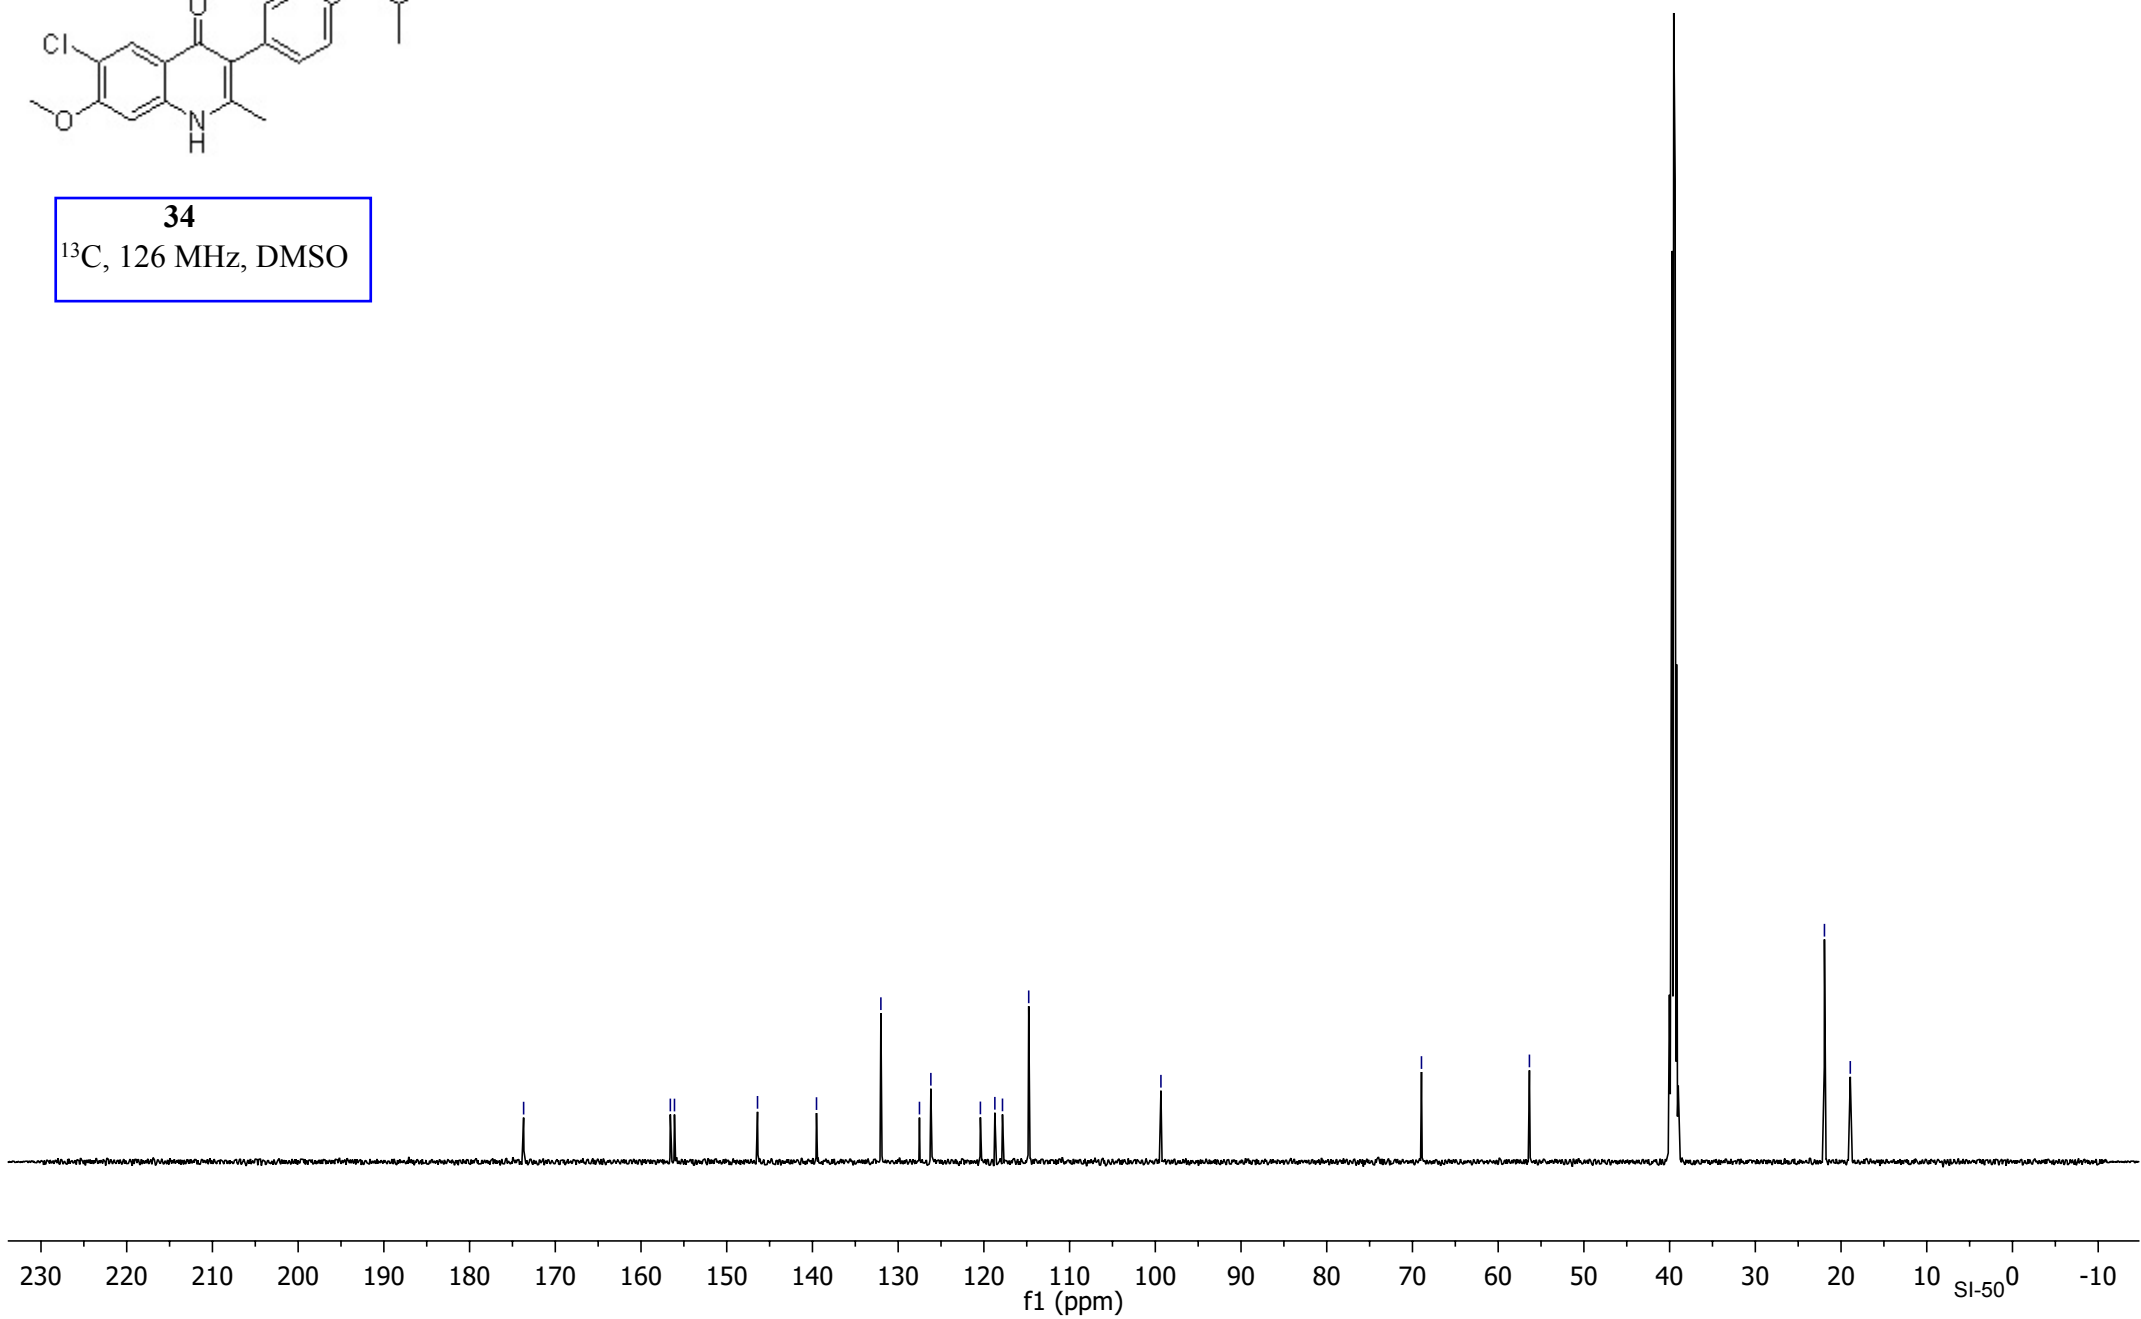

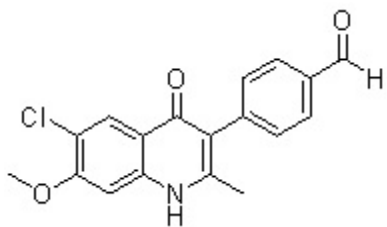

**35**  
<sup>1</sup>H, 400 MHz, DMSO

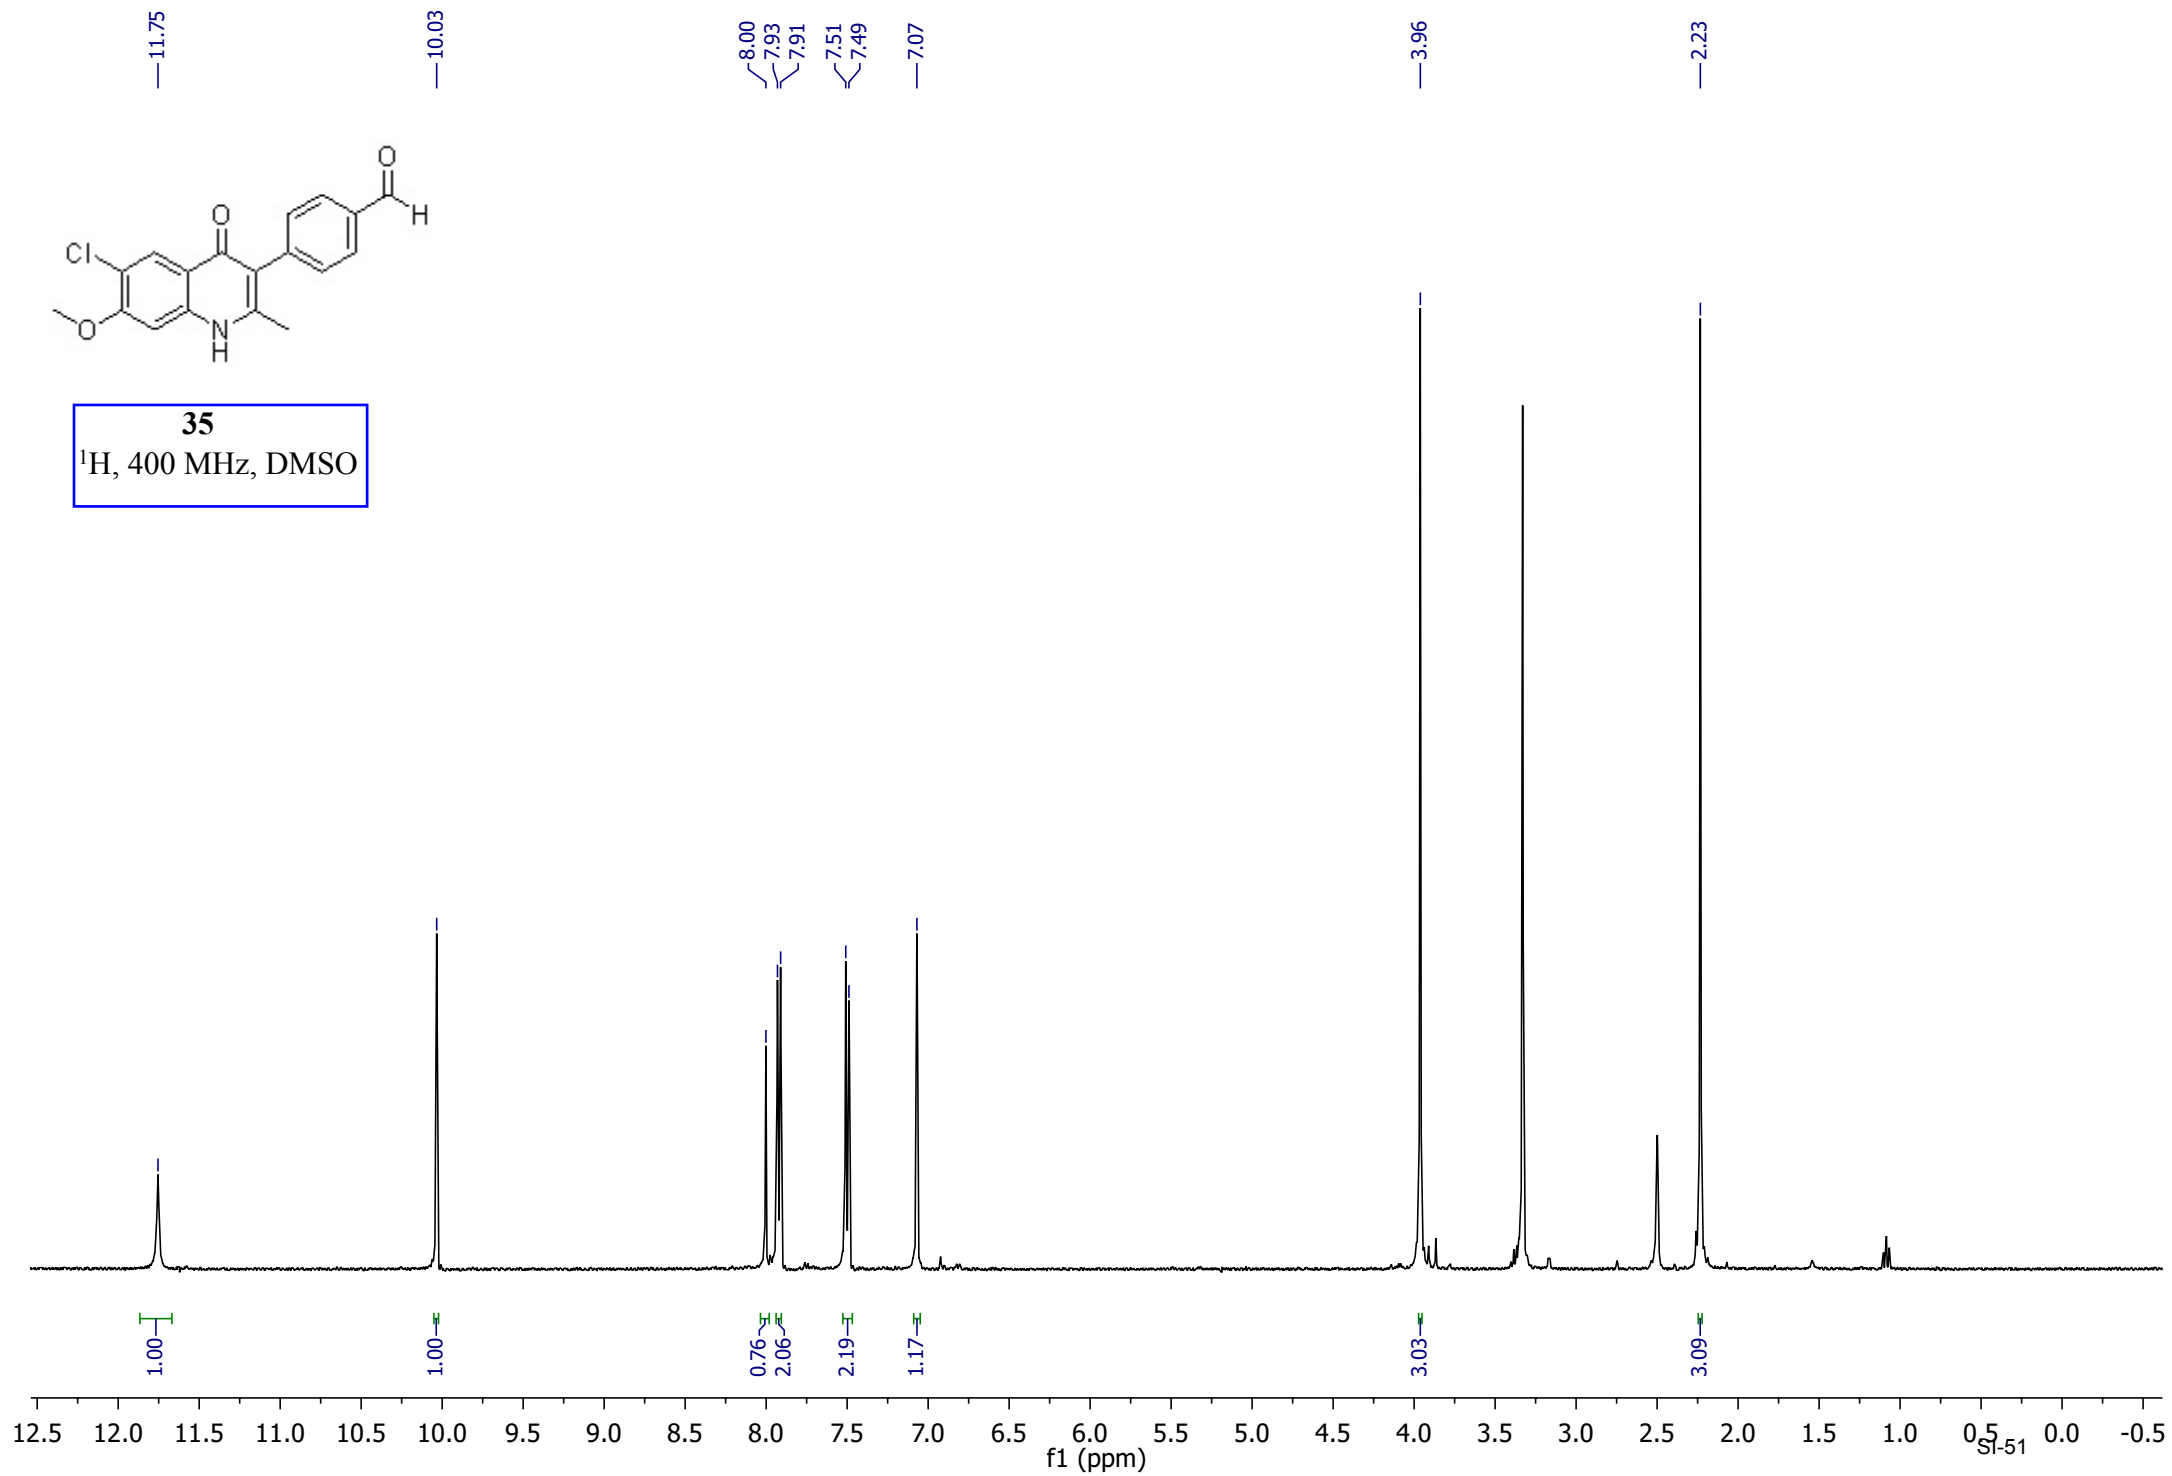

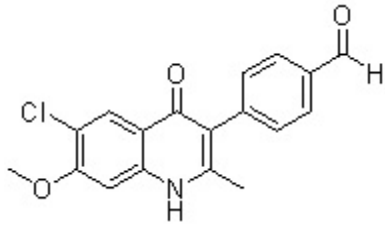

**35**  
<sup>13</sup>C, 101 MHz, DMSO

—192.77

—173.12

—156.84

—146.81

—142.61

—139.59

—134.54

—131.82

—128.89

—126.14

—119.67

—118.73

—118.25

—99.52

—56.41

—18.87

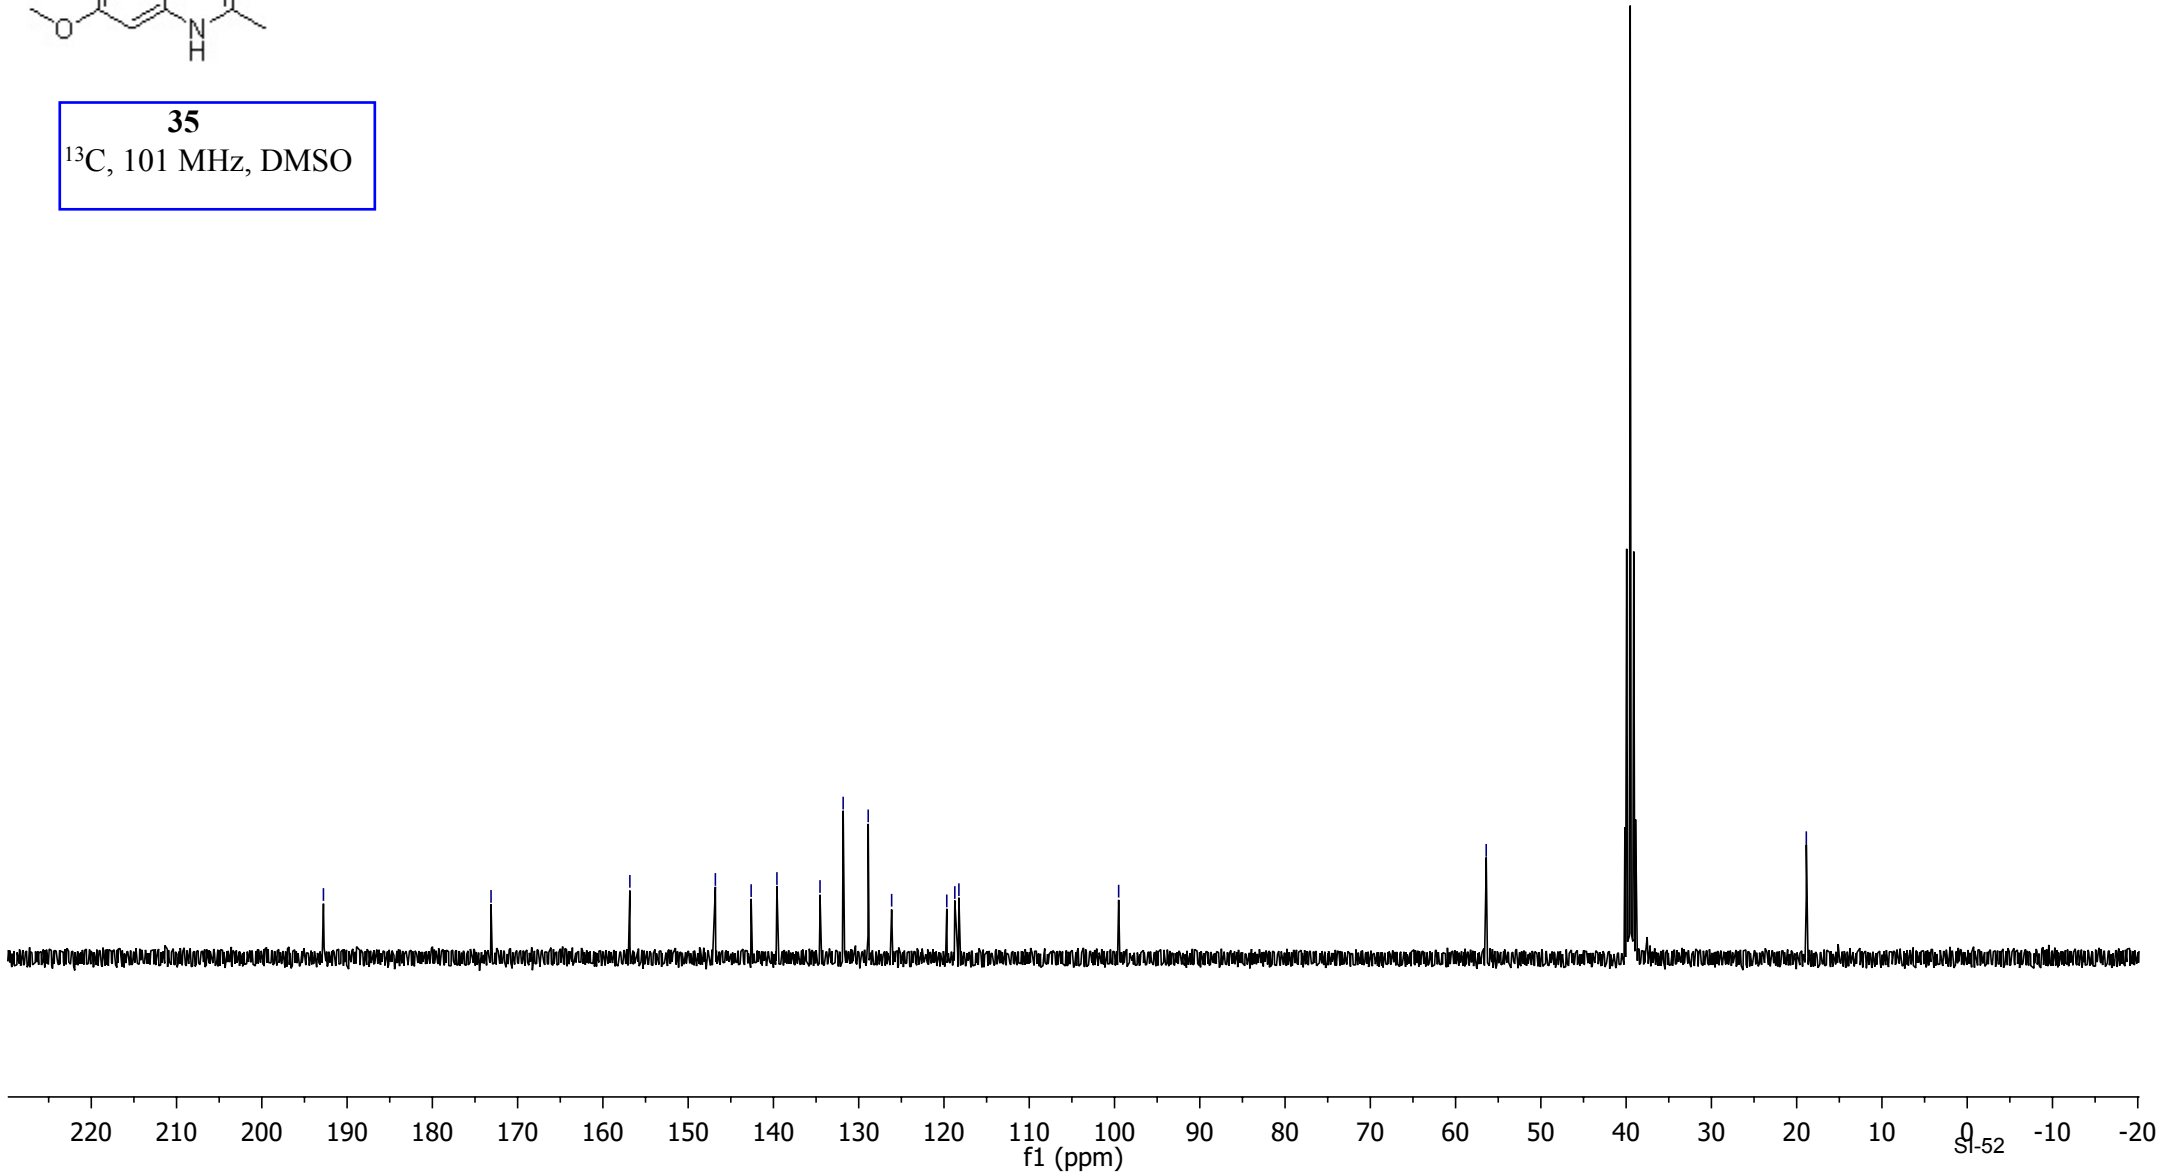

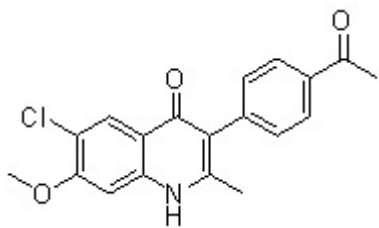

**36**  
<sup>1</sup>H, 250 MHz, DMSO

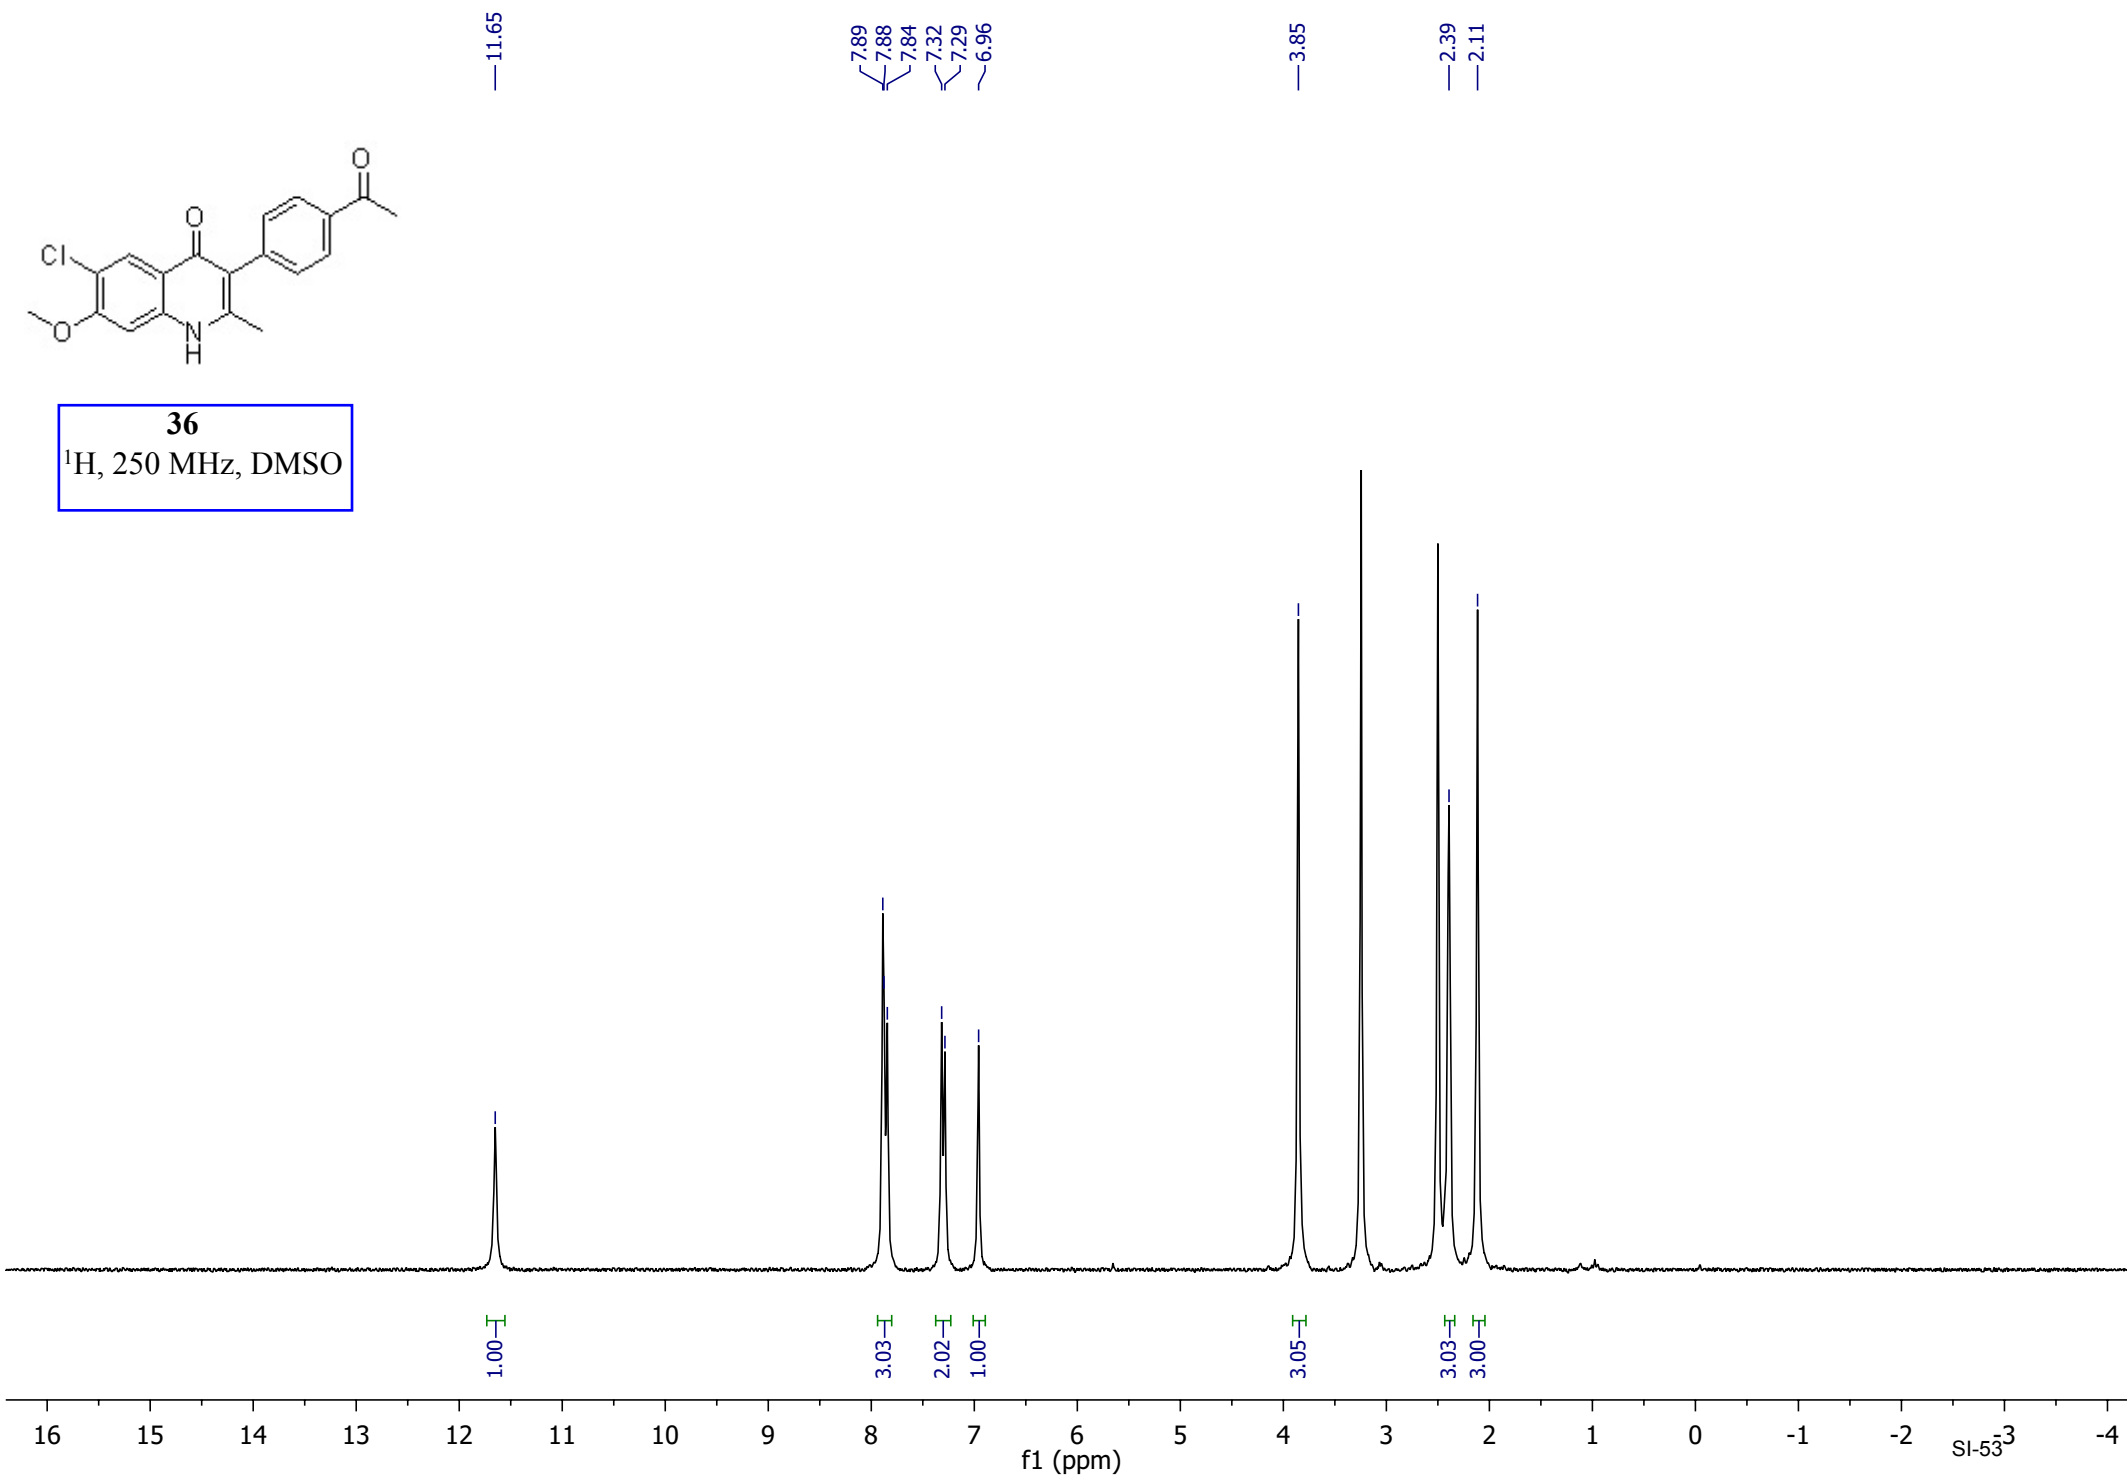



**36**  
<sup>13</sup>C, 101 MHz, DMSO

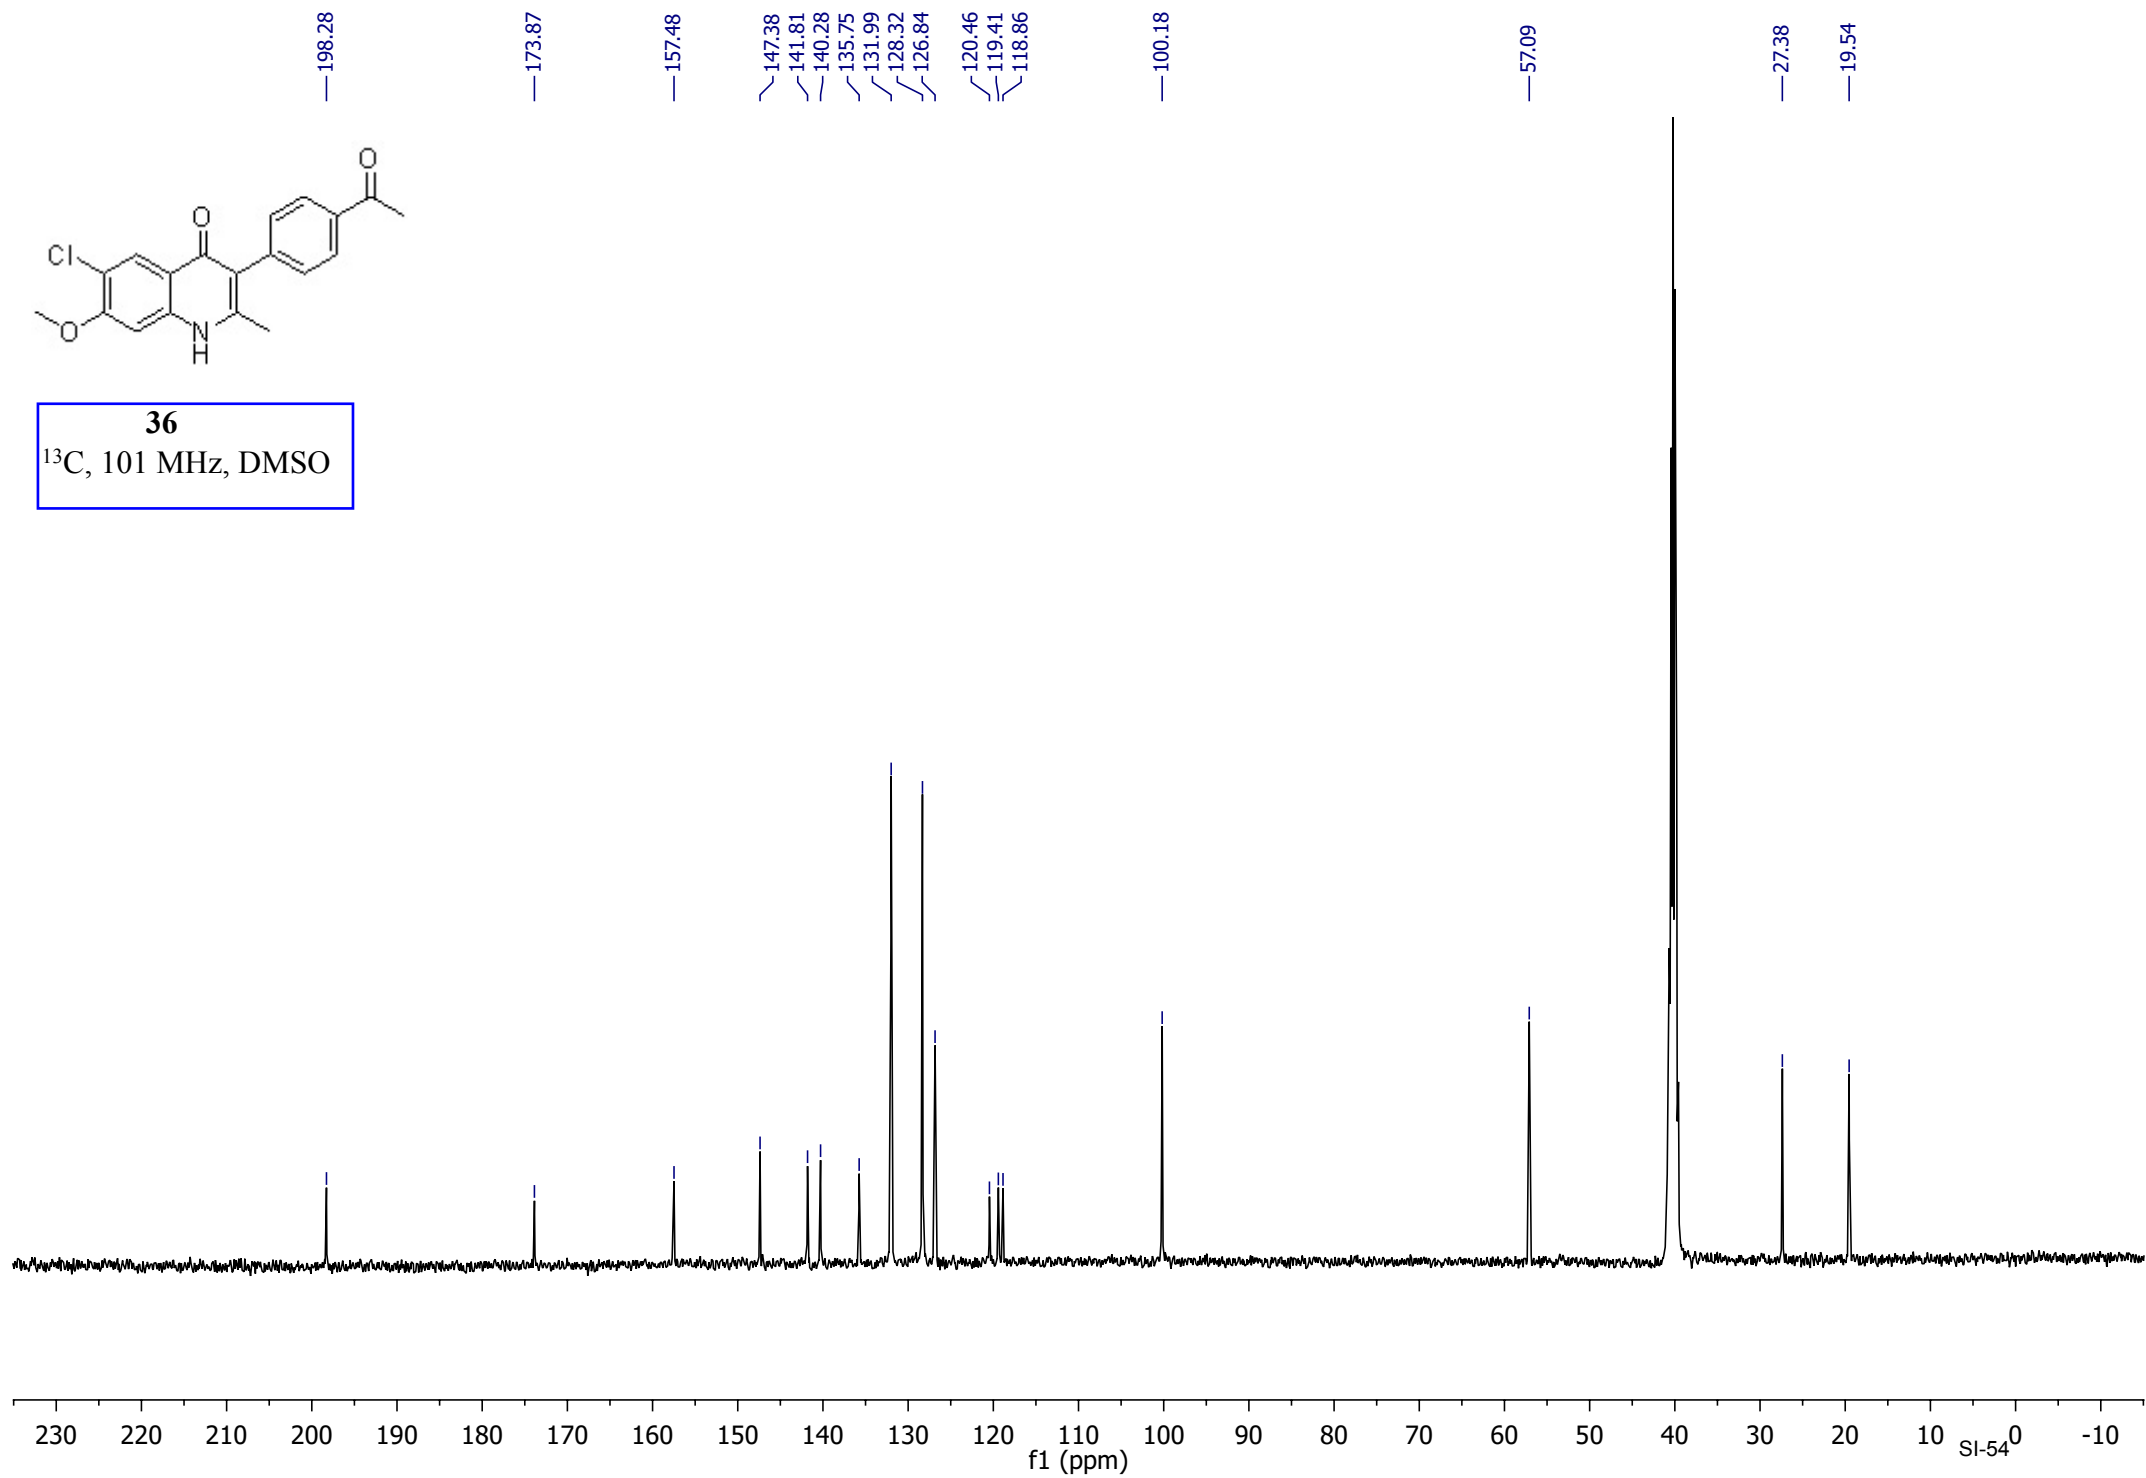

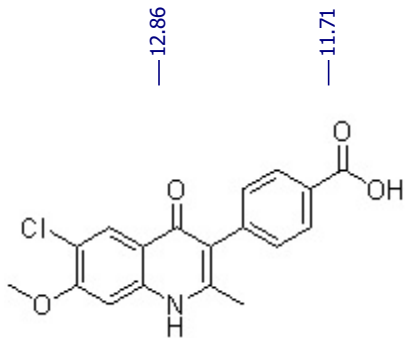

**37**  
<sup>1</sup>H, 400 MHz, DMSO

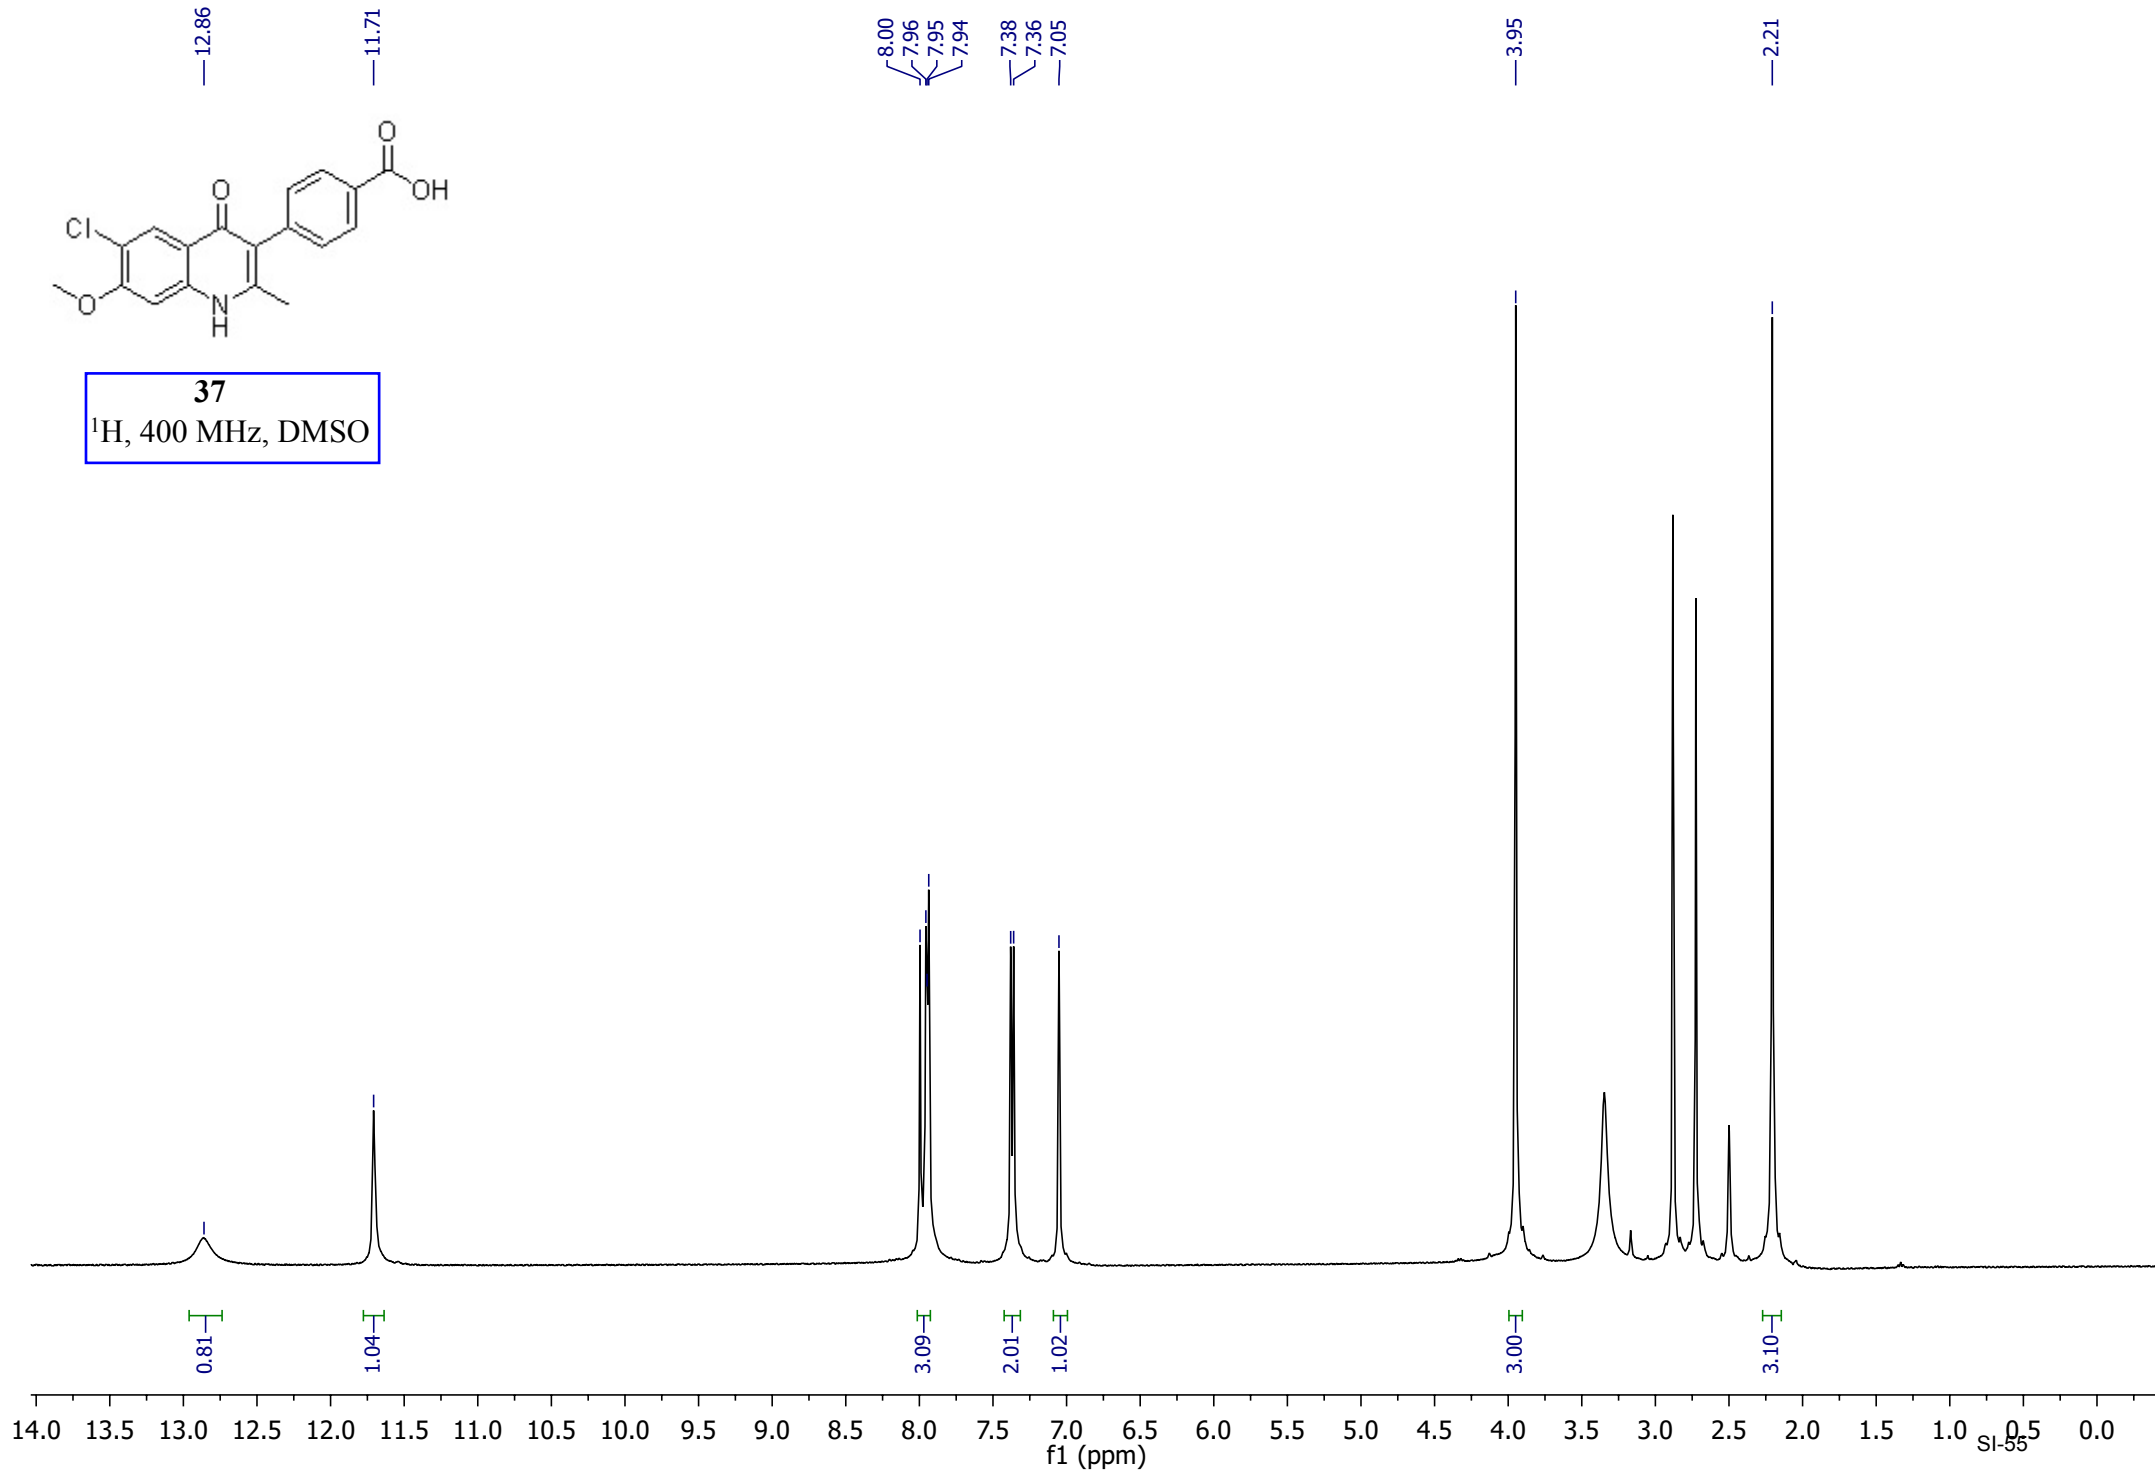



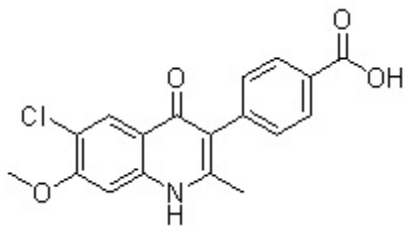

37

$^{13}\text{C}$ , 101 MHz, DMSO

—173.23

—167.32

—156.79

—146.70

—140.76

—139.60

—131.22

—128.92

—128.73

—126.15

—119.85

—118.73

—118.19

—99.49

—56.39

—18.85

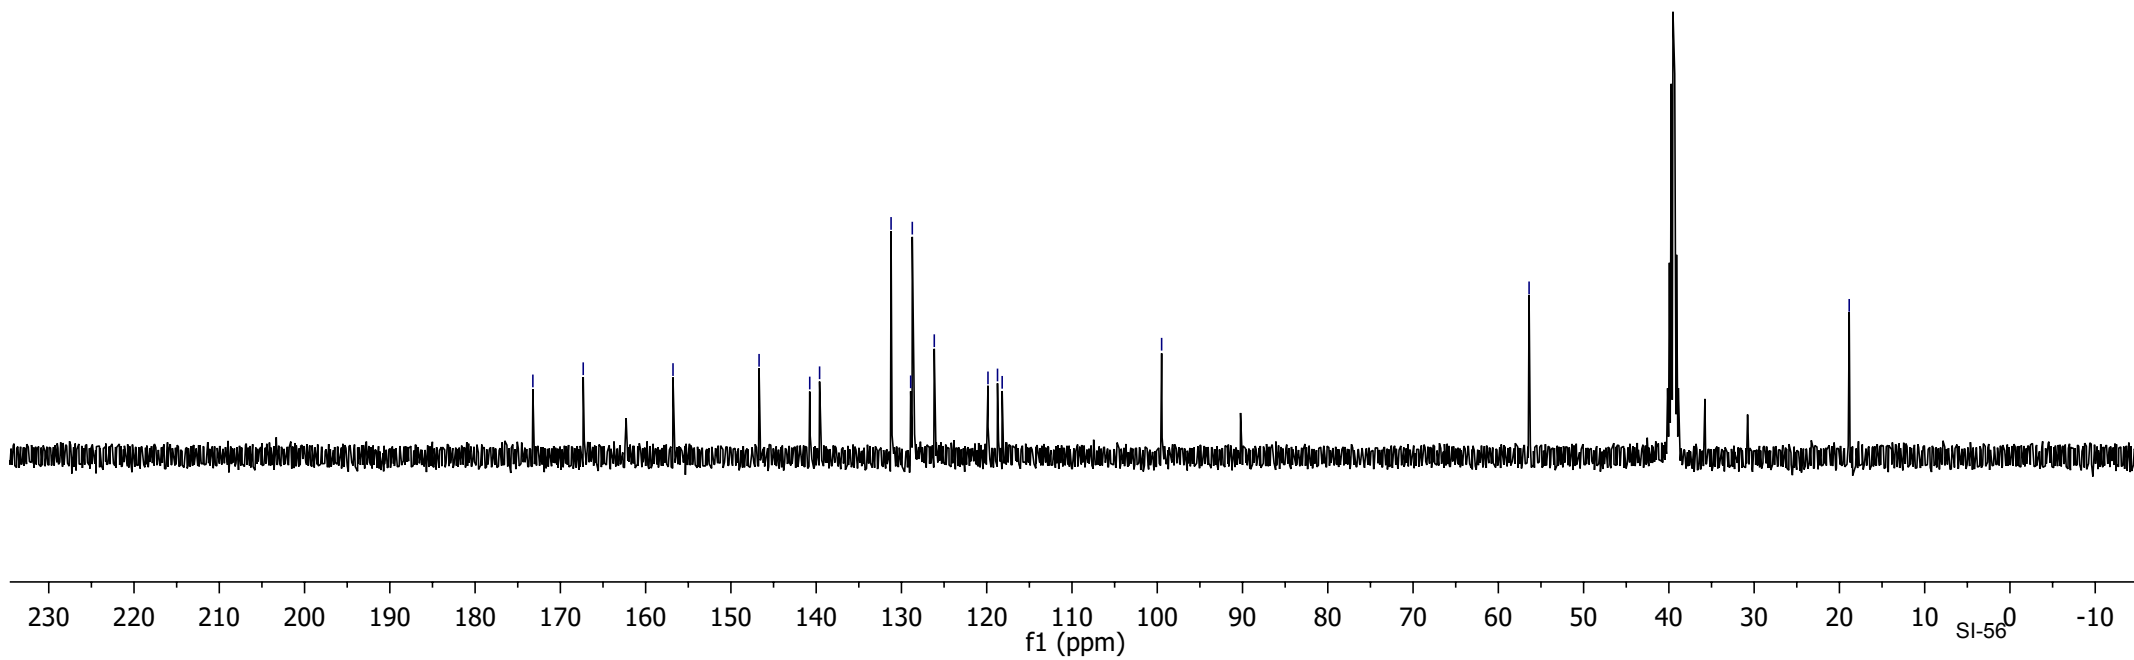

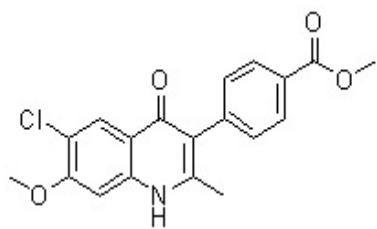

**38**  
<sup>1</sup>H, 400 MHz, DMSO

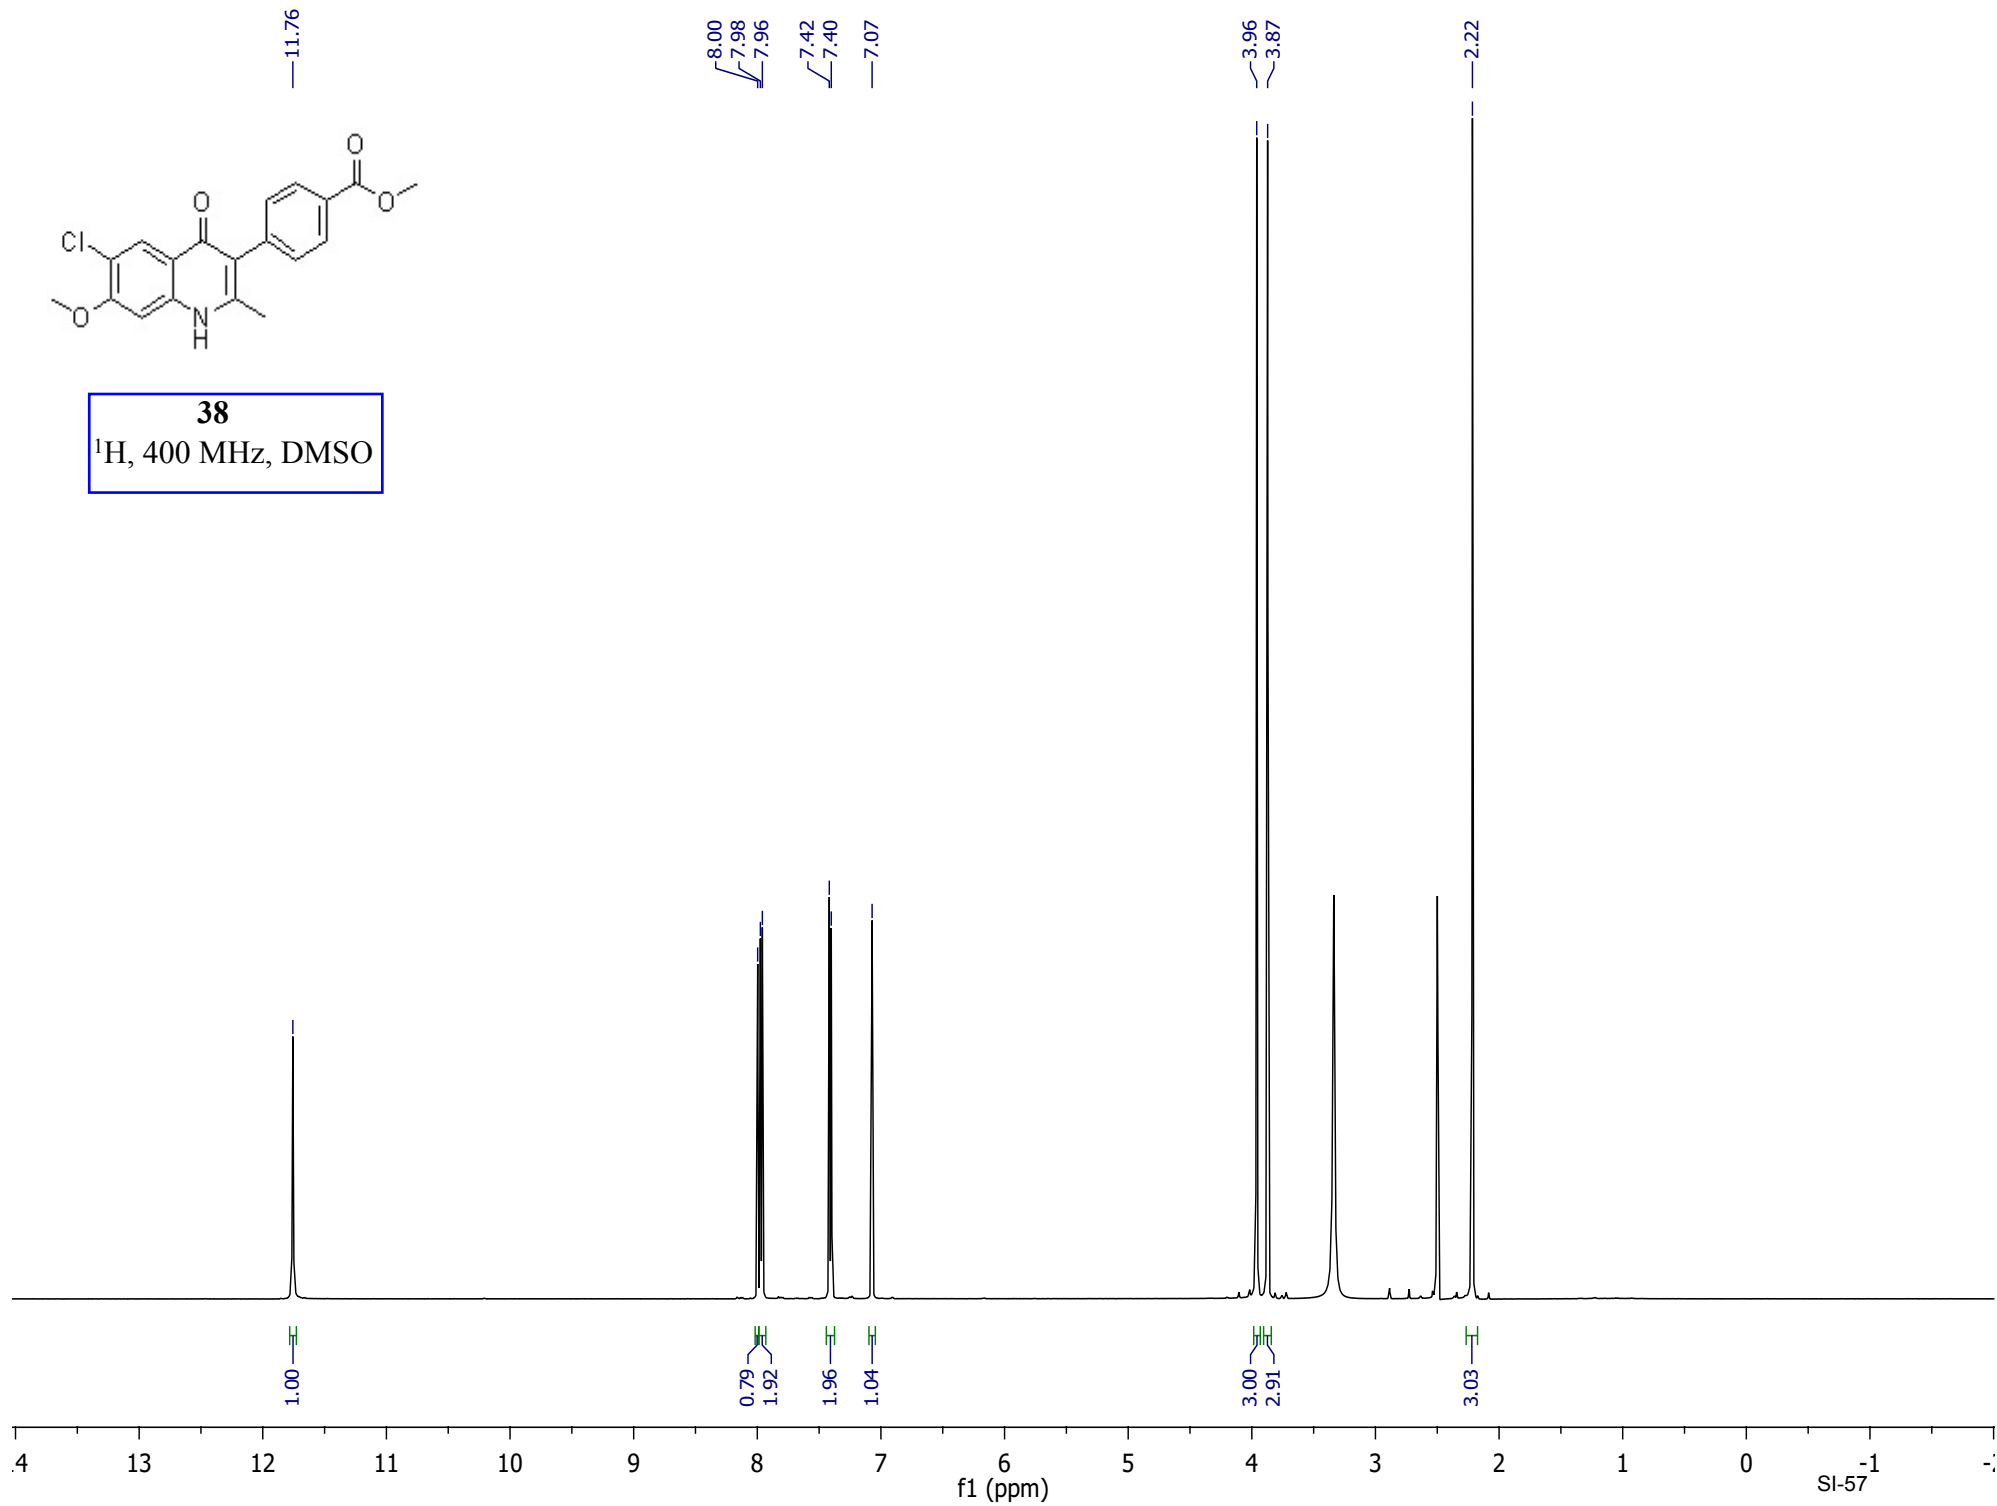



**38**

$^{13}\text{C}$ , 101 MHz, DMSO

—173.17  
—166.25  
—156.83  
—146.78  
—139.62  
—131.44  
—128.58  
—127.75  
—126.15  
—119.70  
—118.74  
—118.22

—99.53

—56.43  
—52.11

—18.87

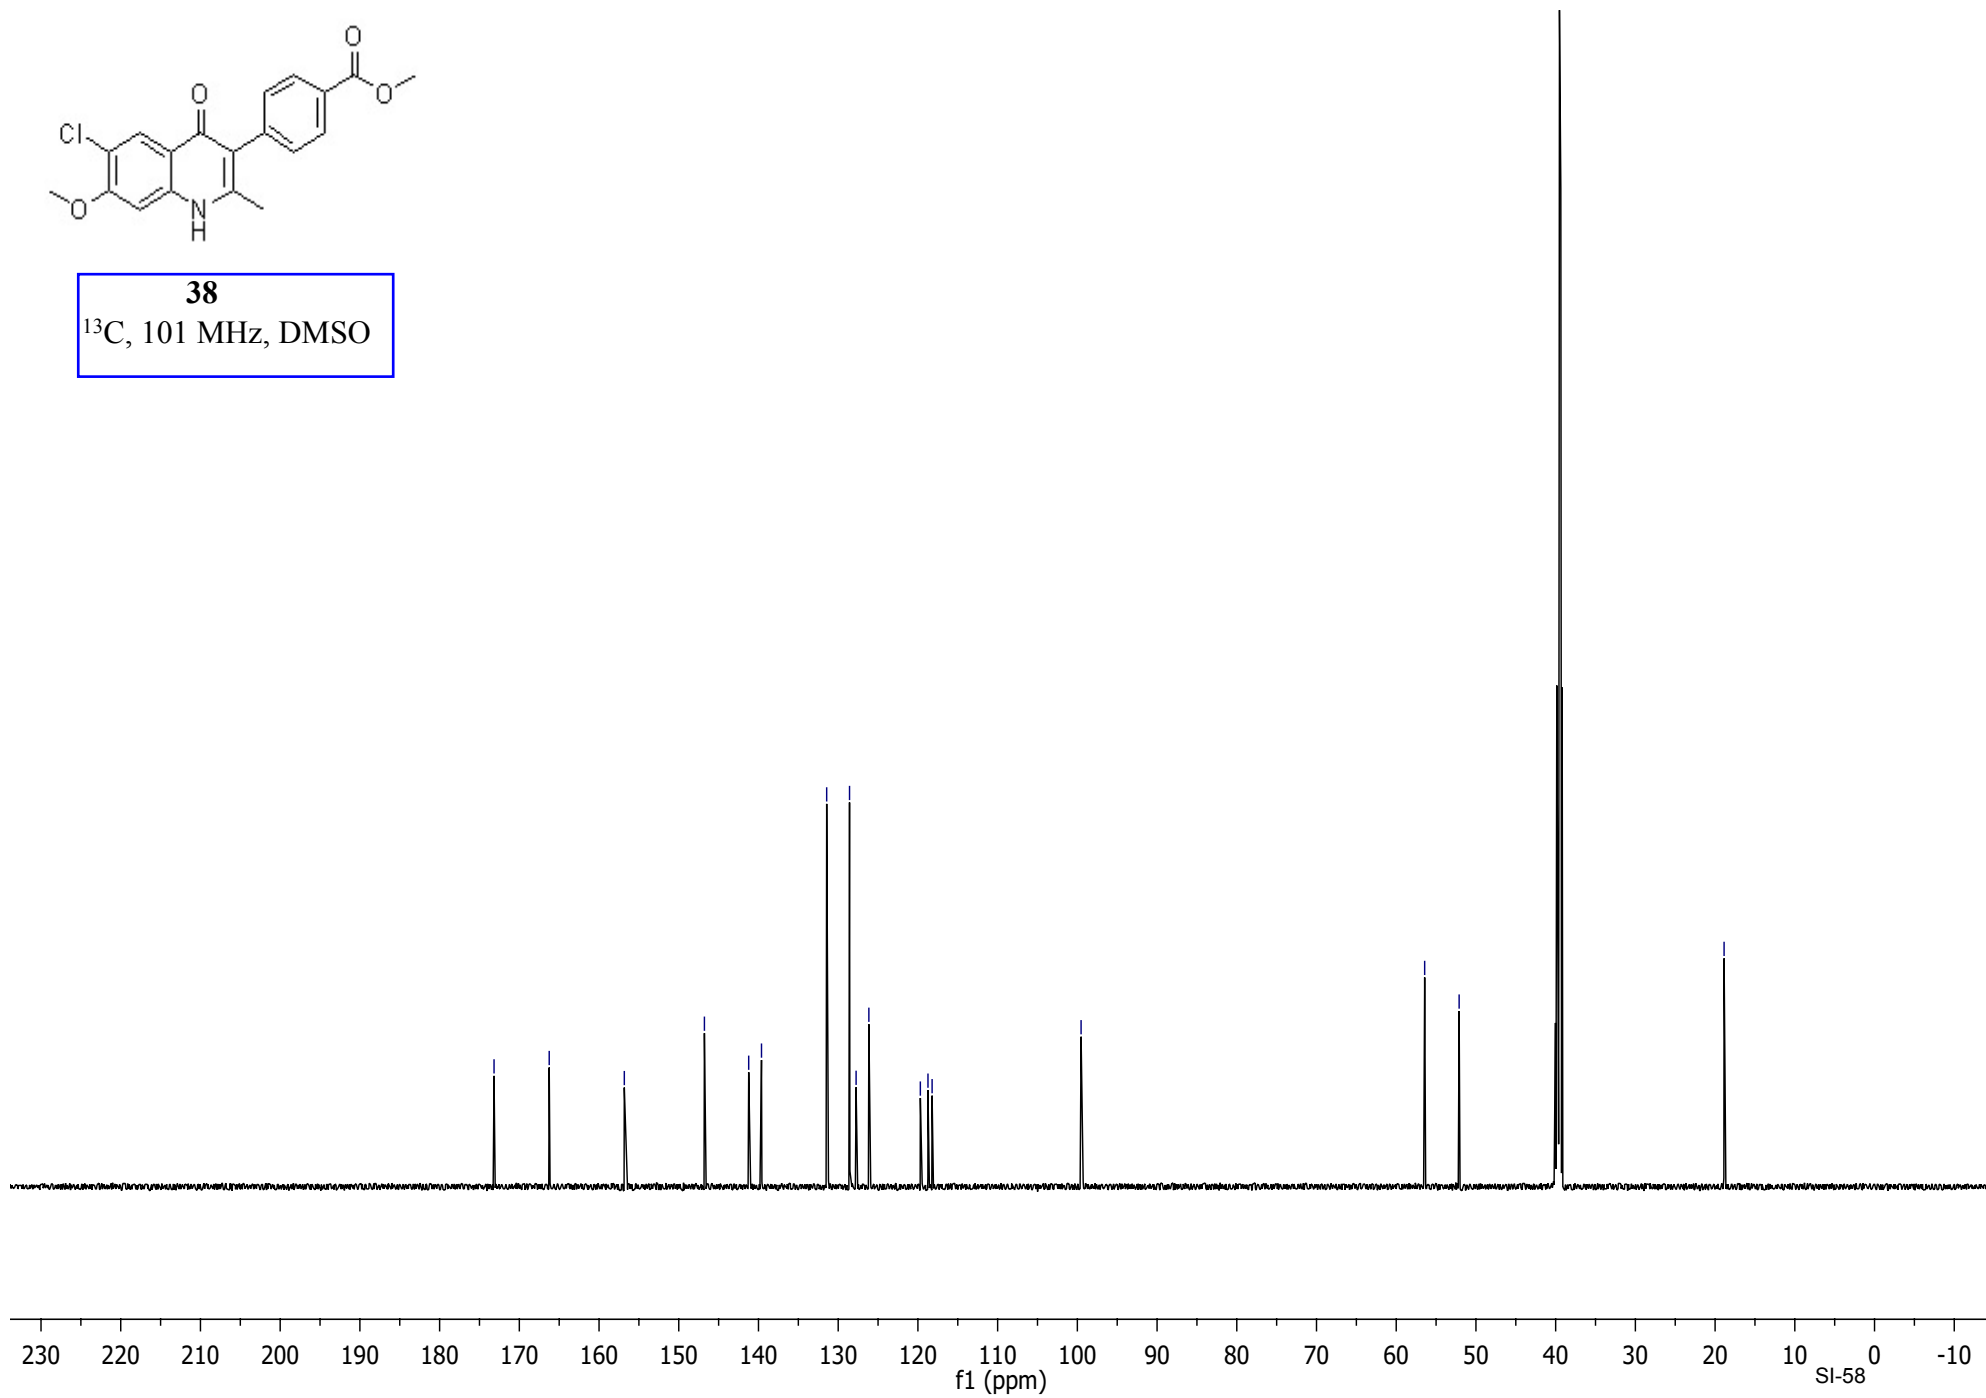

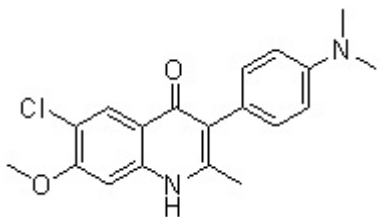

**39**  
<sup>1</sup>H, 400 MHz, DMSO

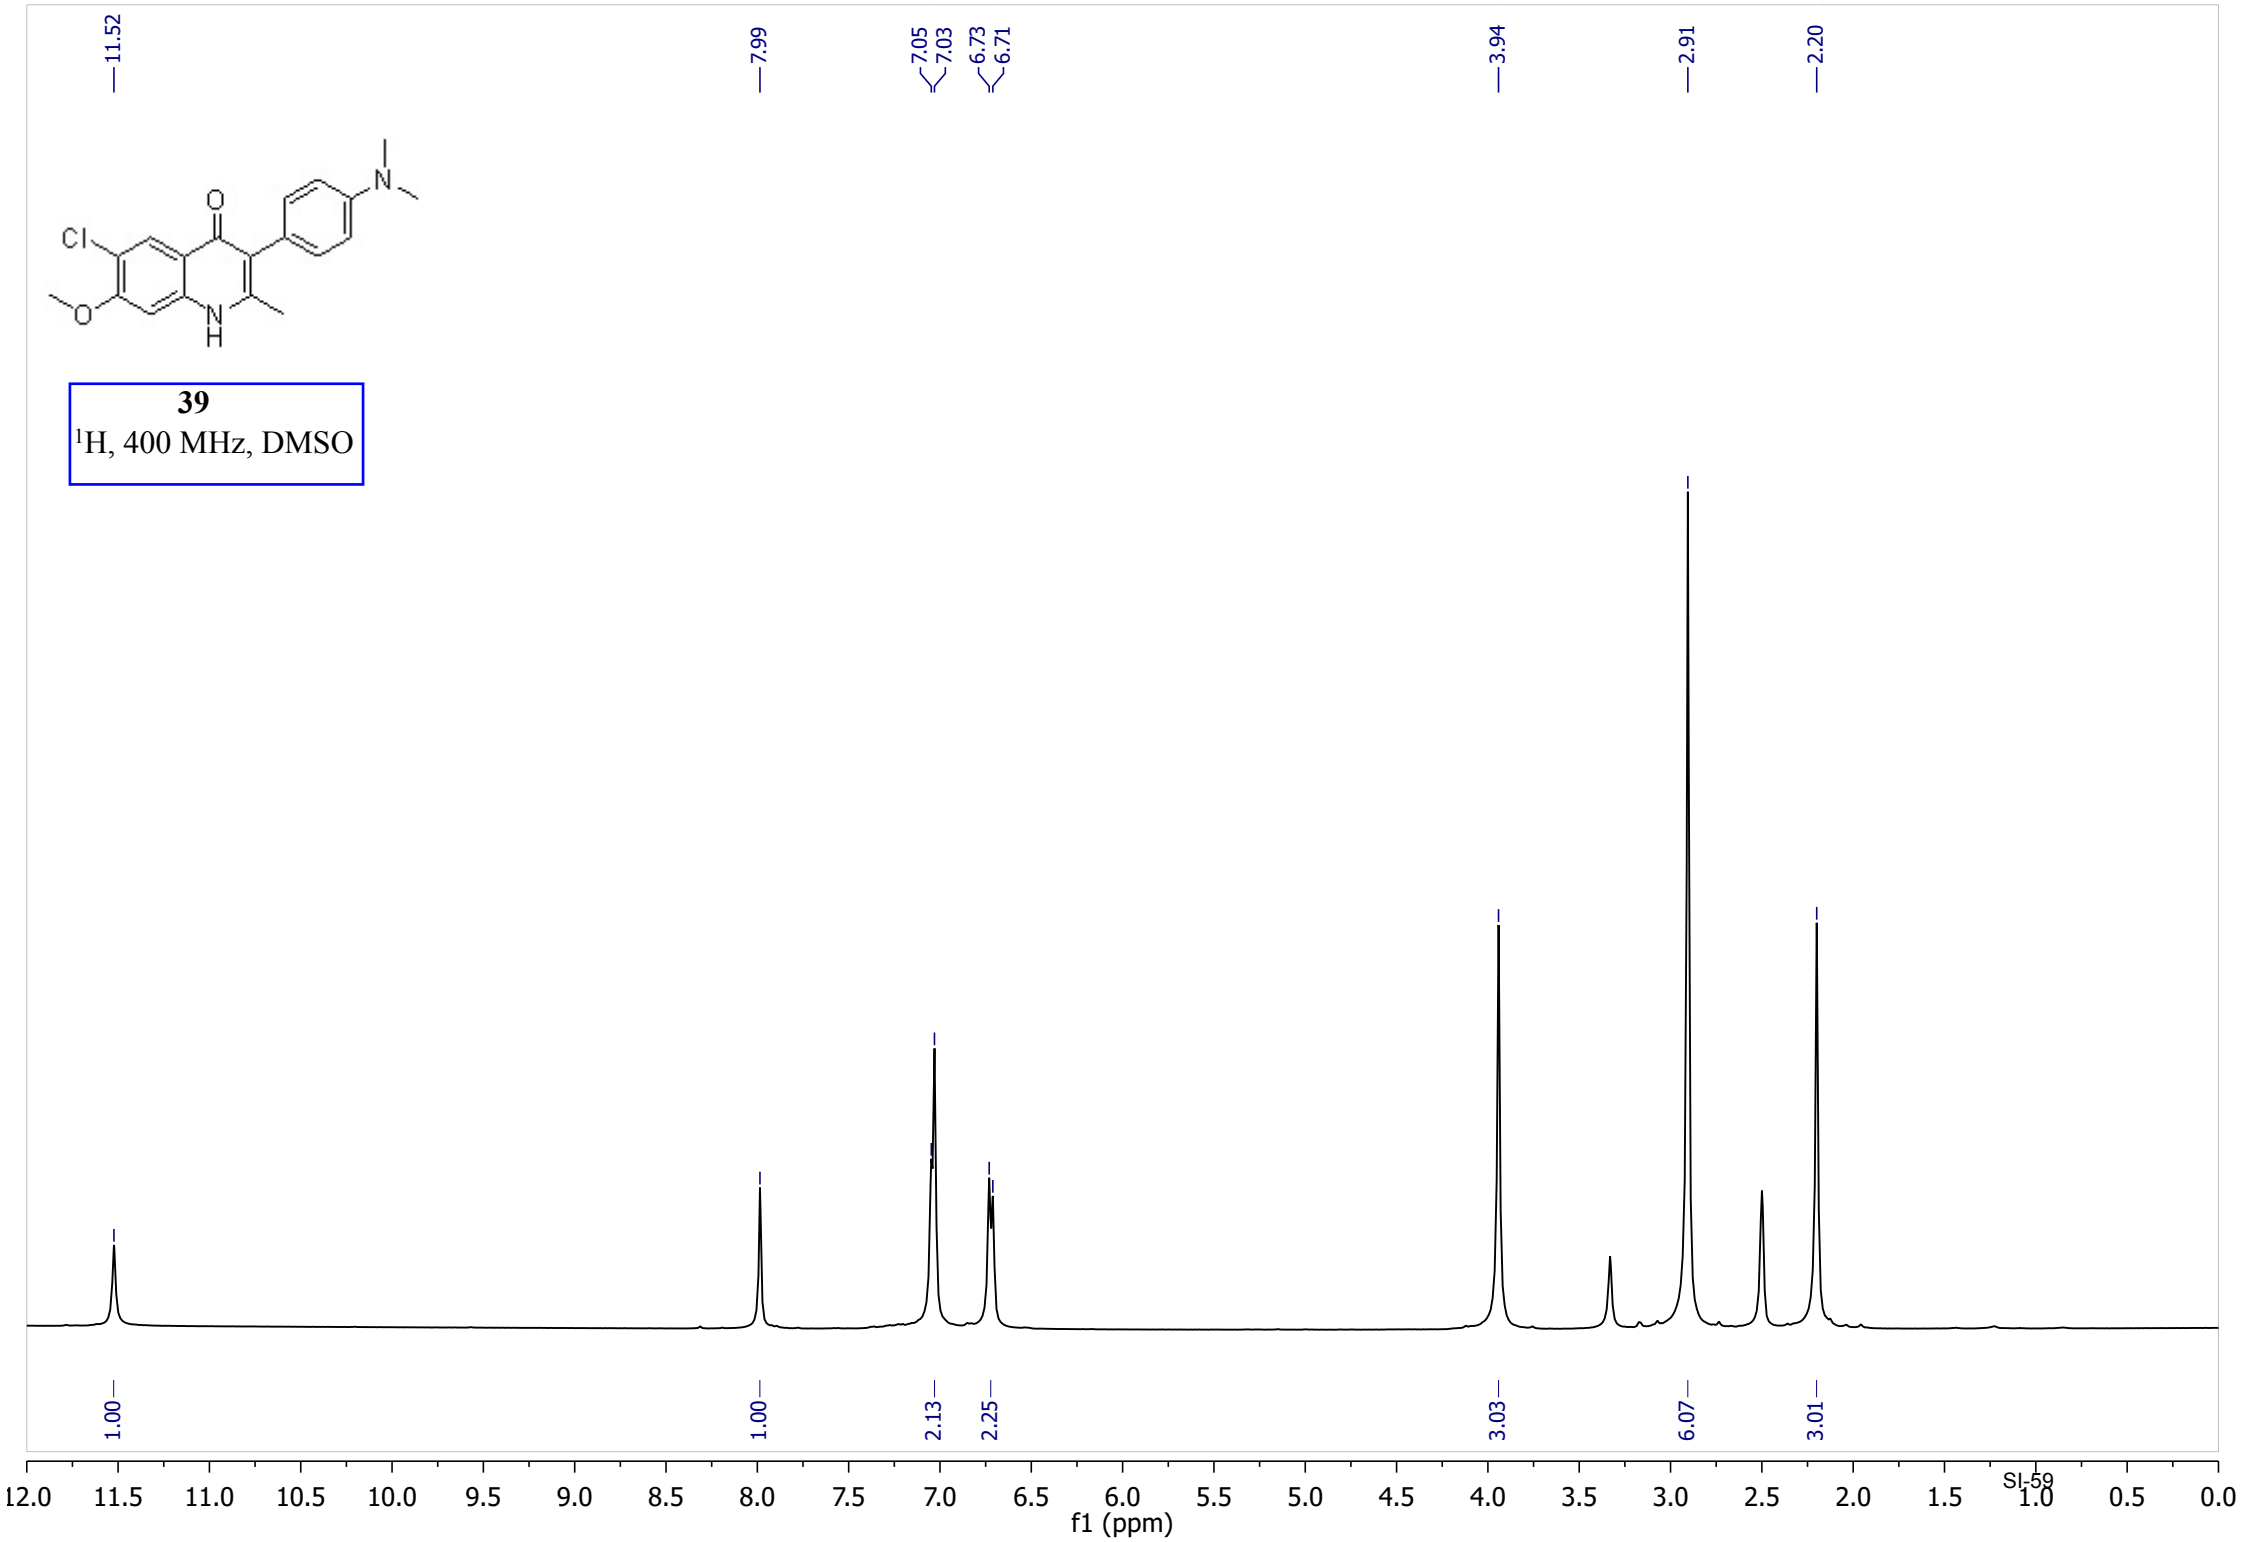

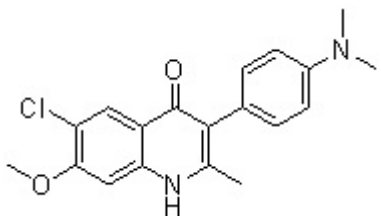

**39**  
<sup>13</sup>C, 101 MHz, DMSO

—173.86      —156.46      —149.07      —146.14      —139.45      —131.36      —126.21      —123.29      —120.83      —118.72      —117.65      —111.81      —99.29      —56.30      —40.19      —18.92

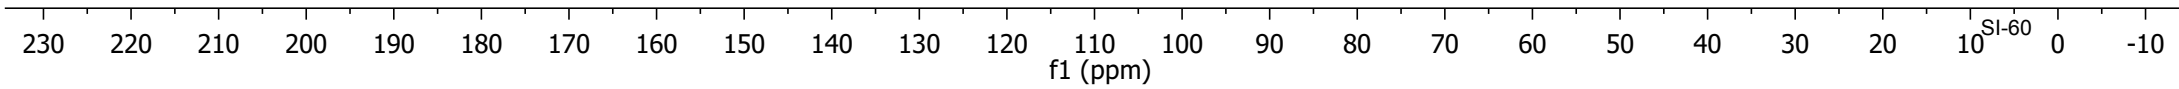

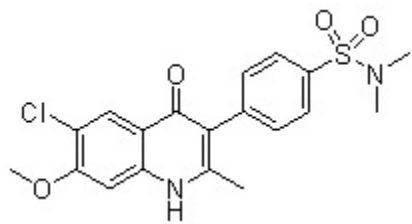

**40**  
<sup>1</sup>H, 400 MHz, DMSO

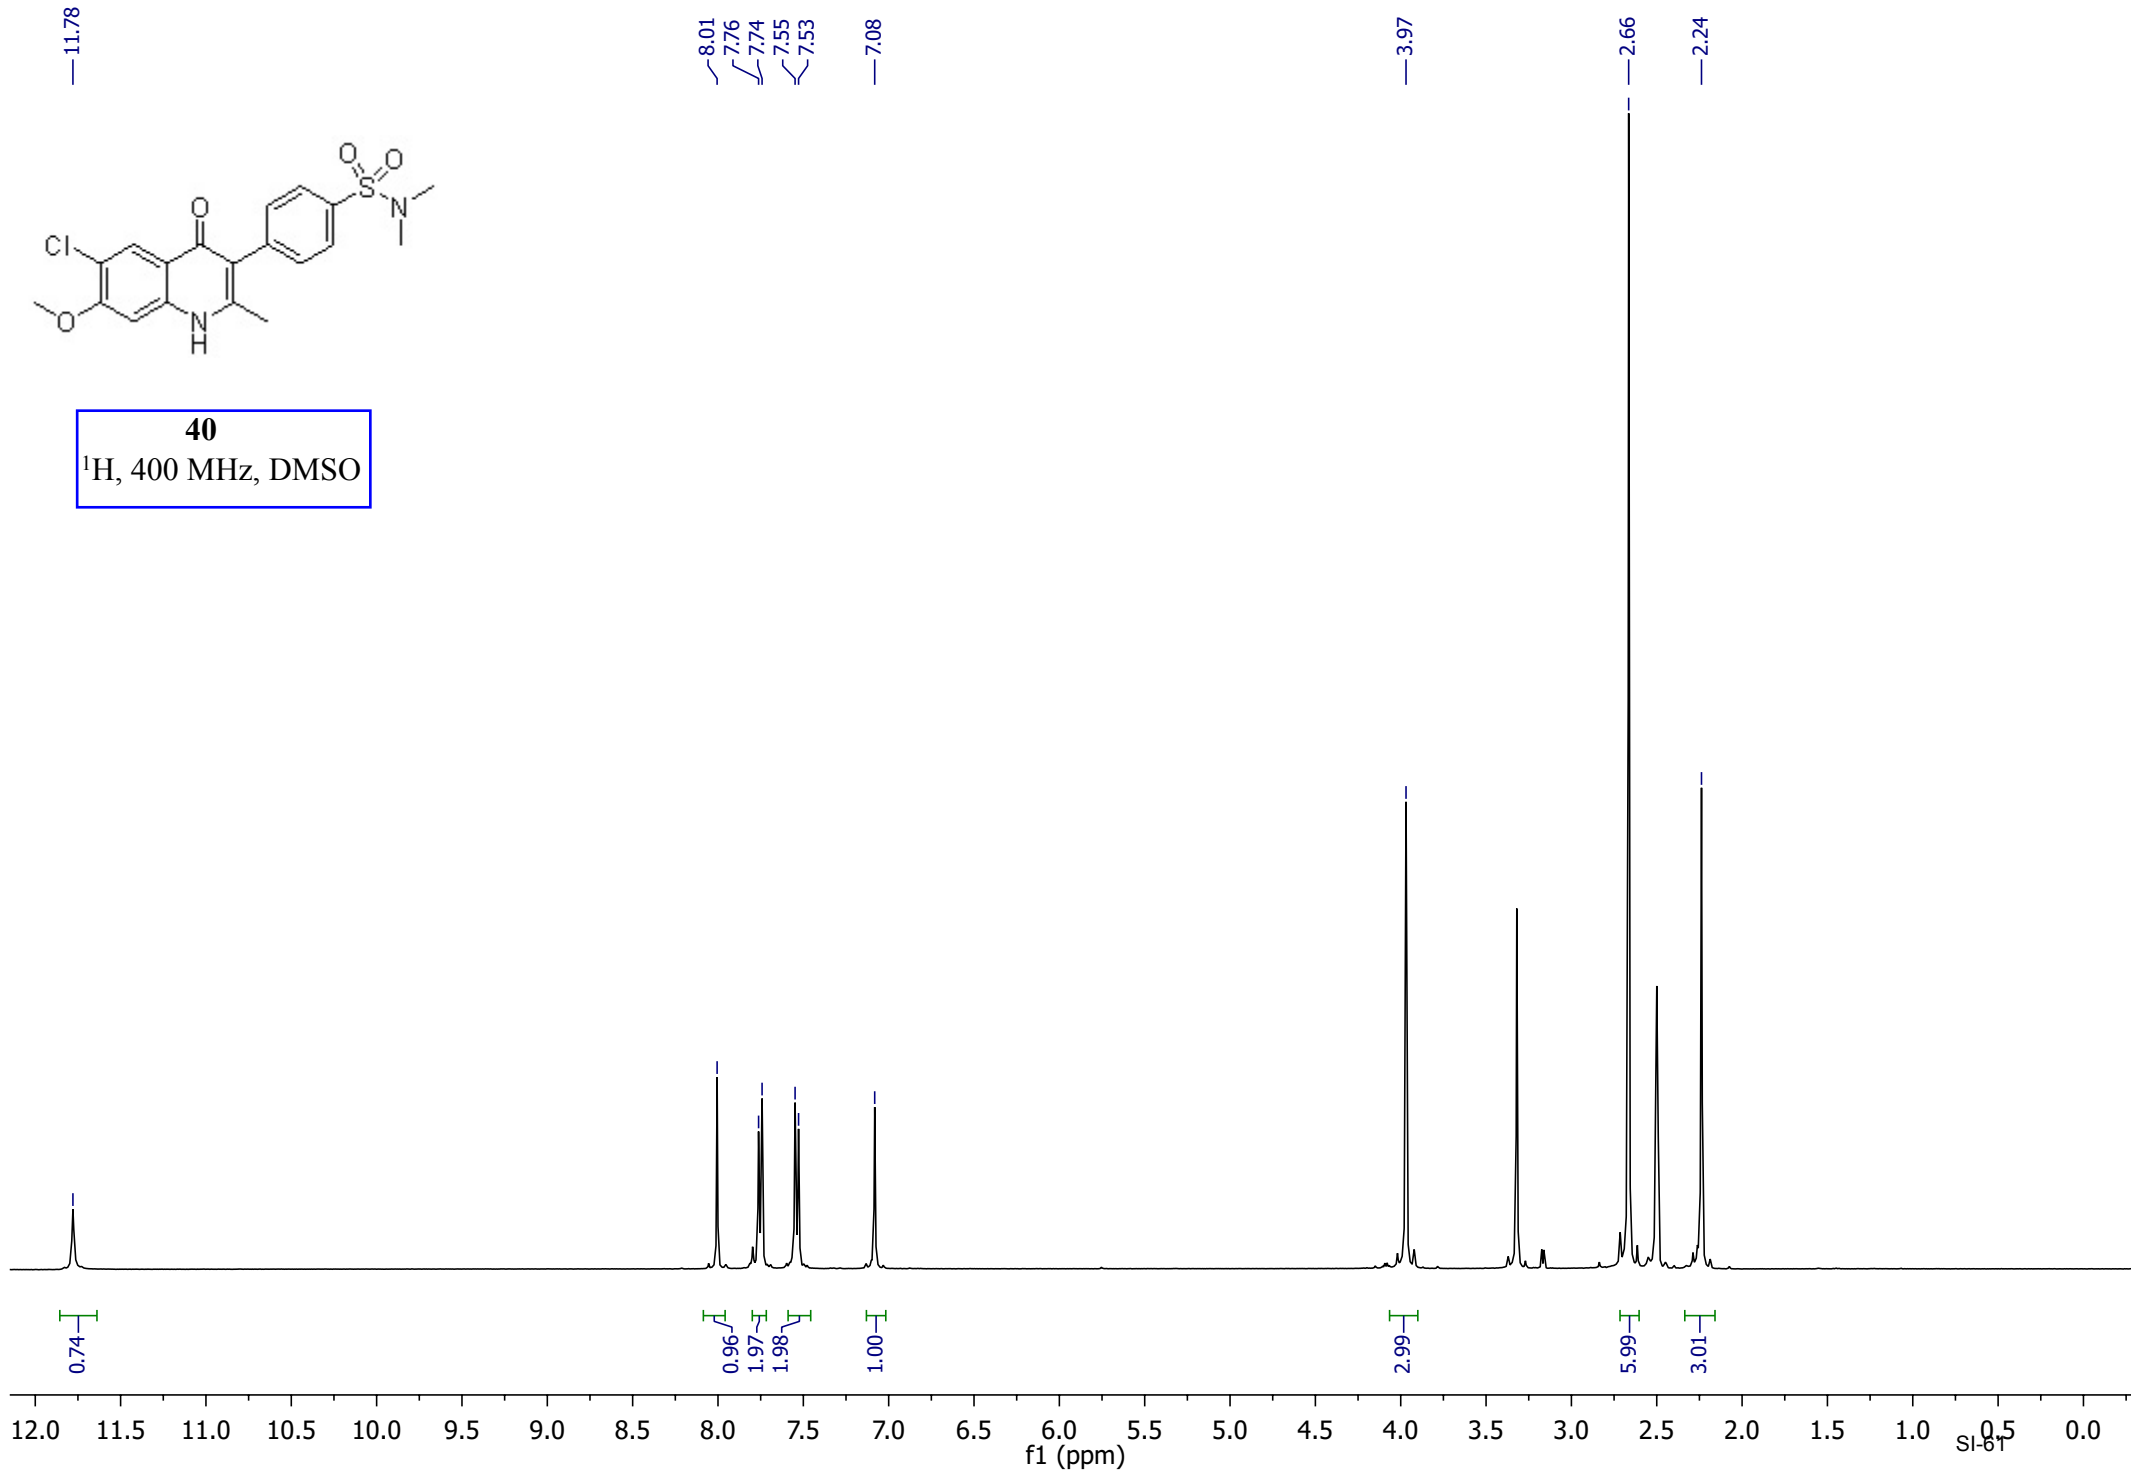

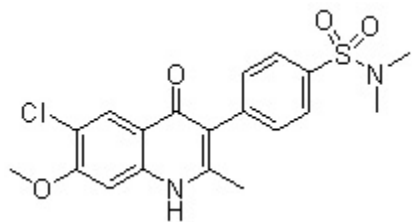

**40**  
<sup>13</sup>C, 101 MHz, DMSO

—173.06

—156.87

—146.98

—140.84

—139.60

—132.84

—131.88

—126.92

—126.09

—119.14

—118.69

—118.28

—99.54

—56.42

—37.60

—18.87

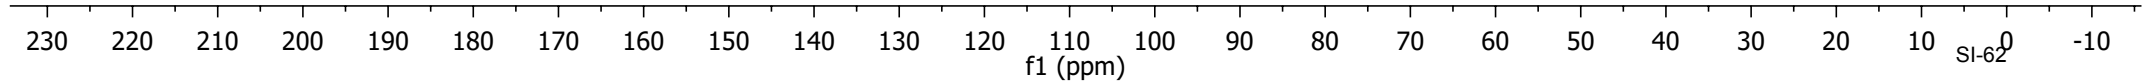

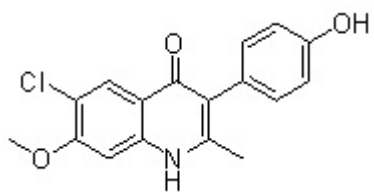

**41**  
<sup>1</sup>H, 400 MHz, DMSO

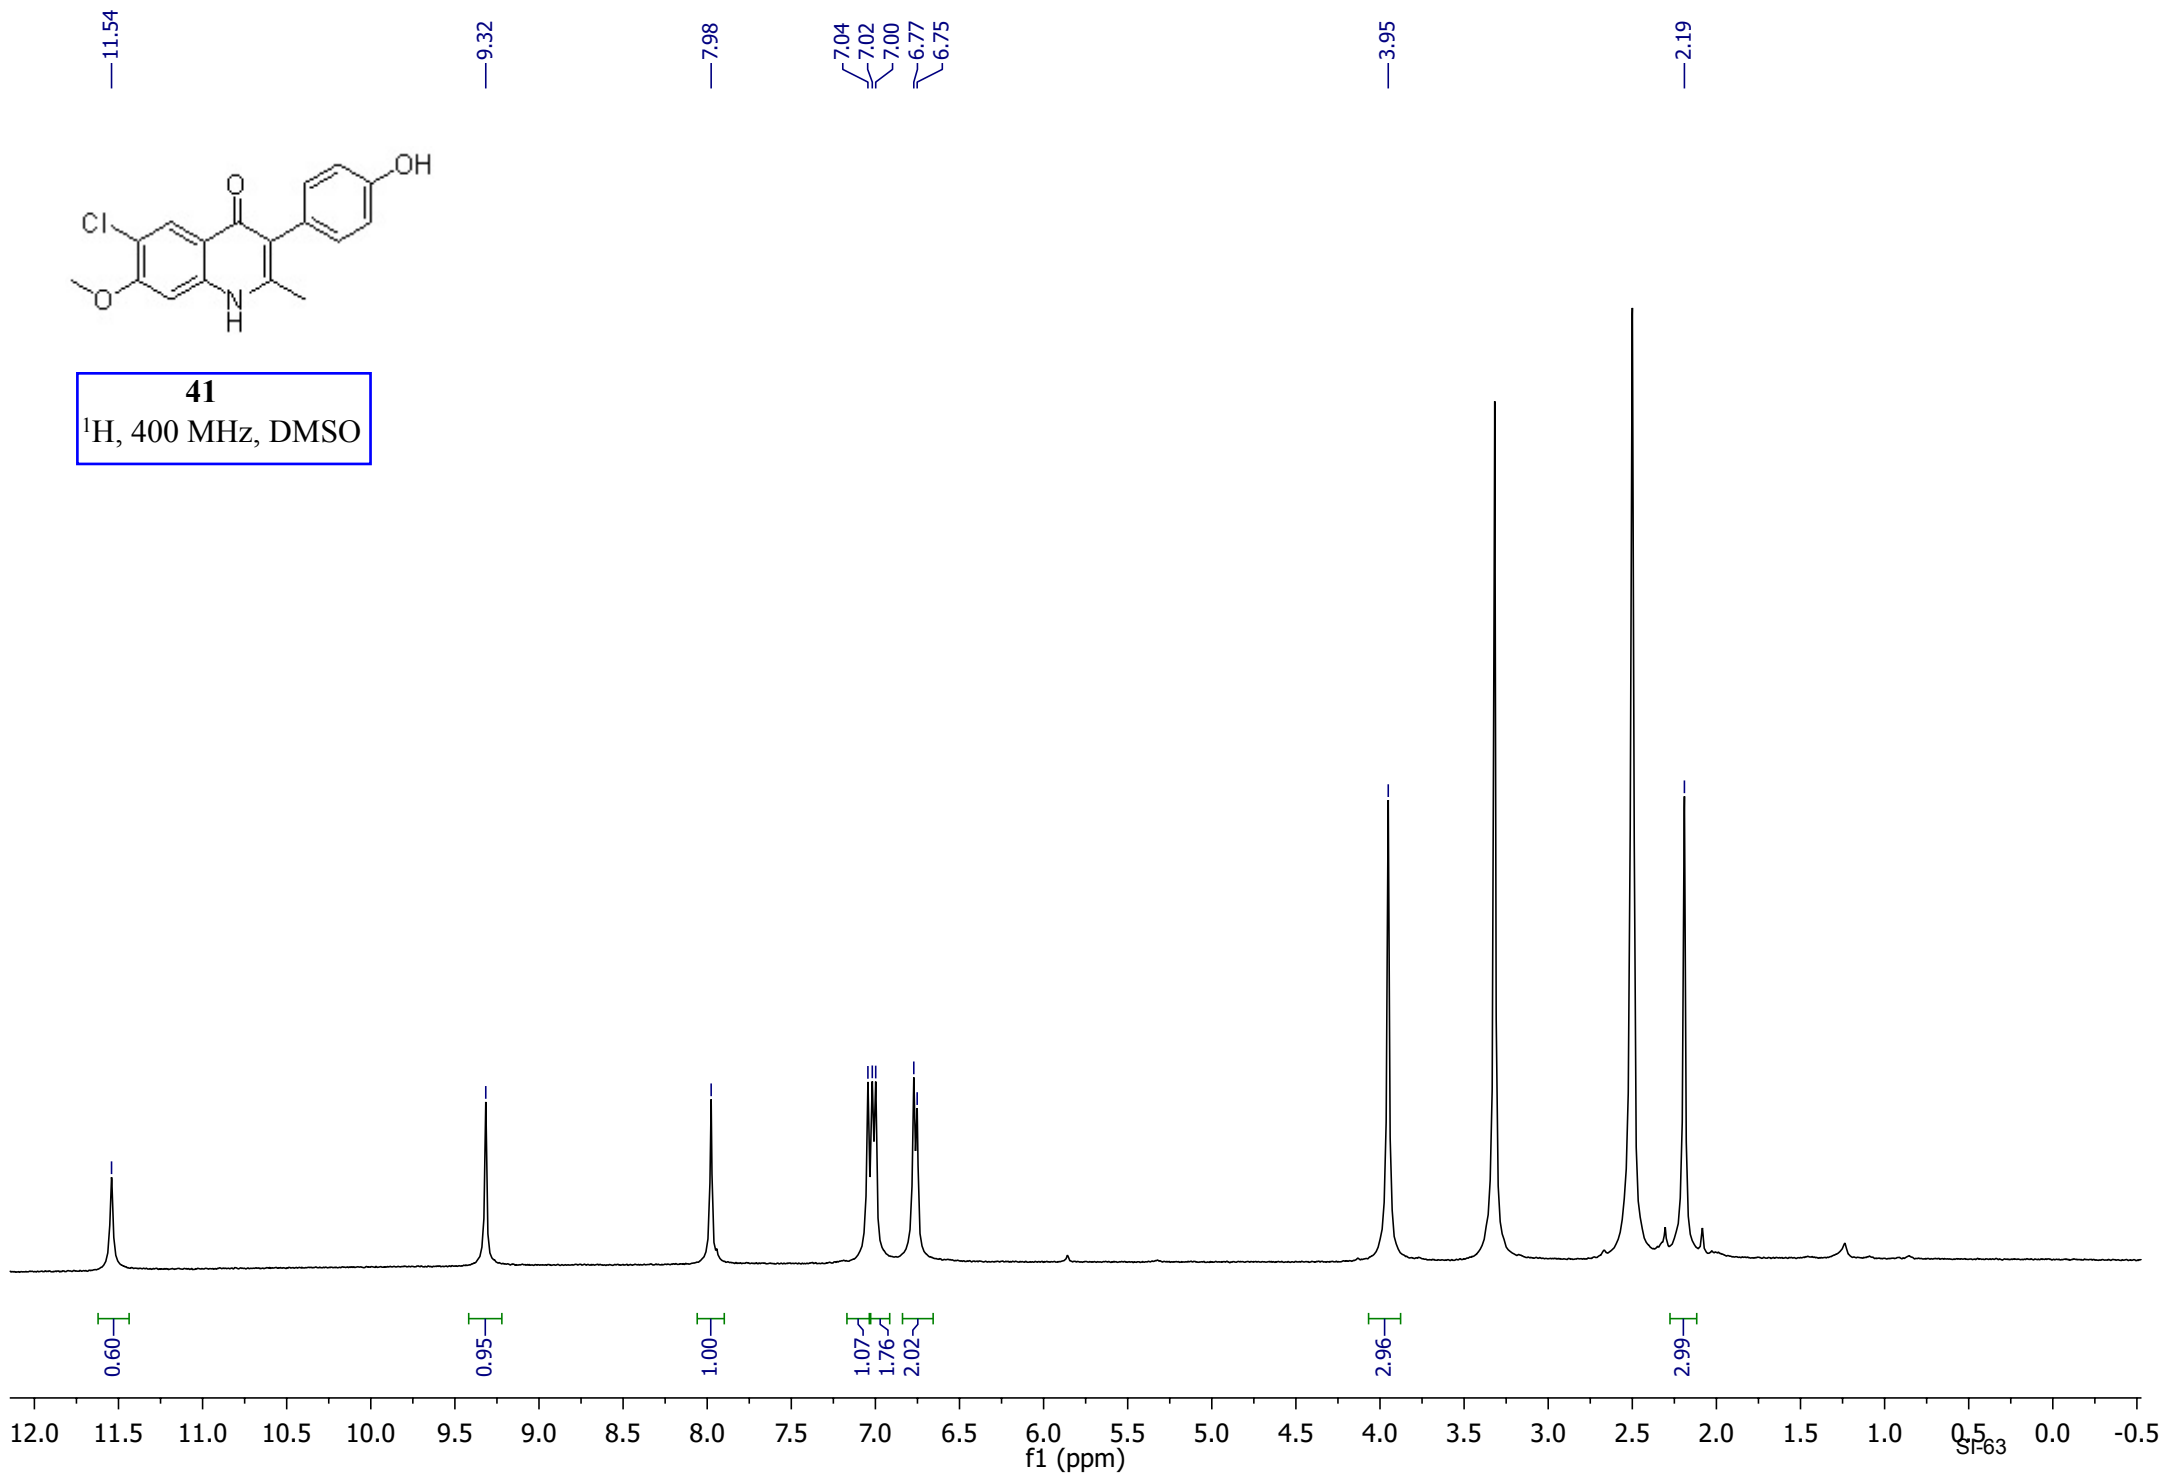





**41**  
<sup>13</sup>C, 101 MHz, DMSO

—174.44

—157.22  
—156.64

—146.98

—140.18

—132.55

—126.87

—126.74

—121.40

—119.40

—118.43

—115.28

—100.00

—57.02

—19.58

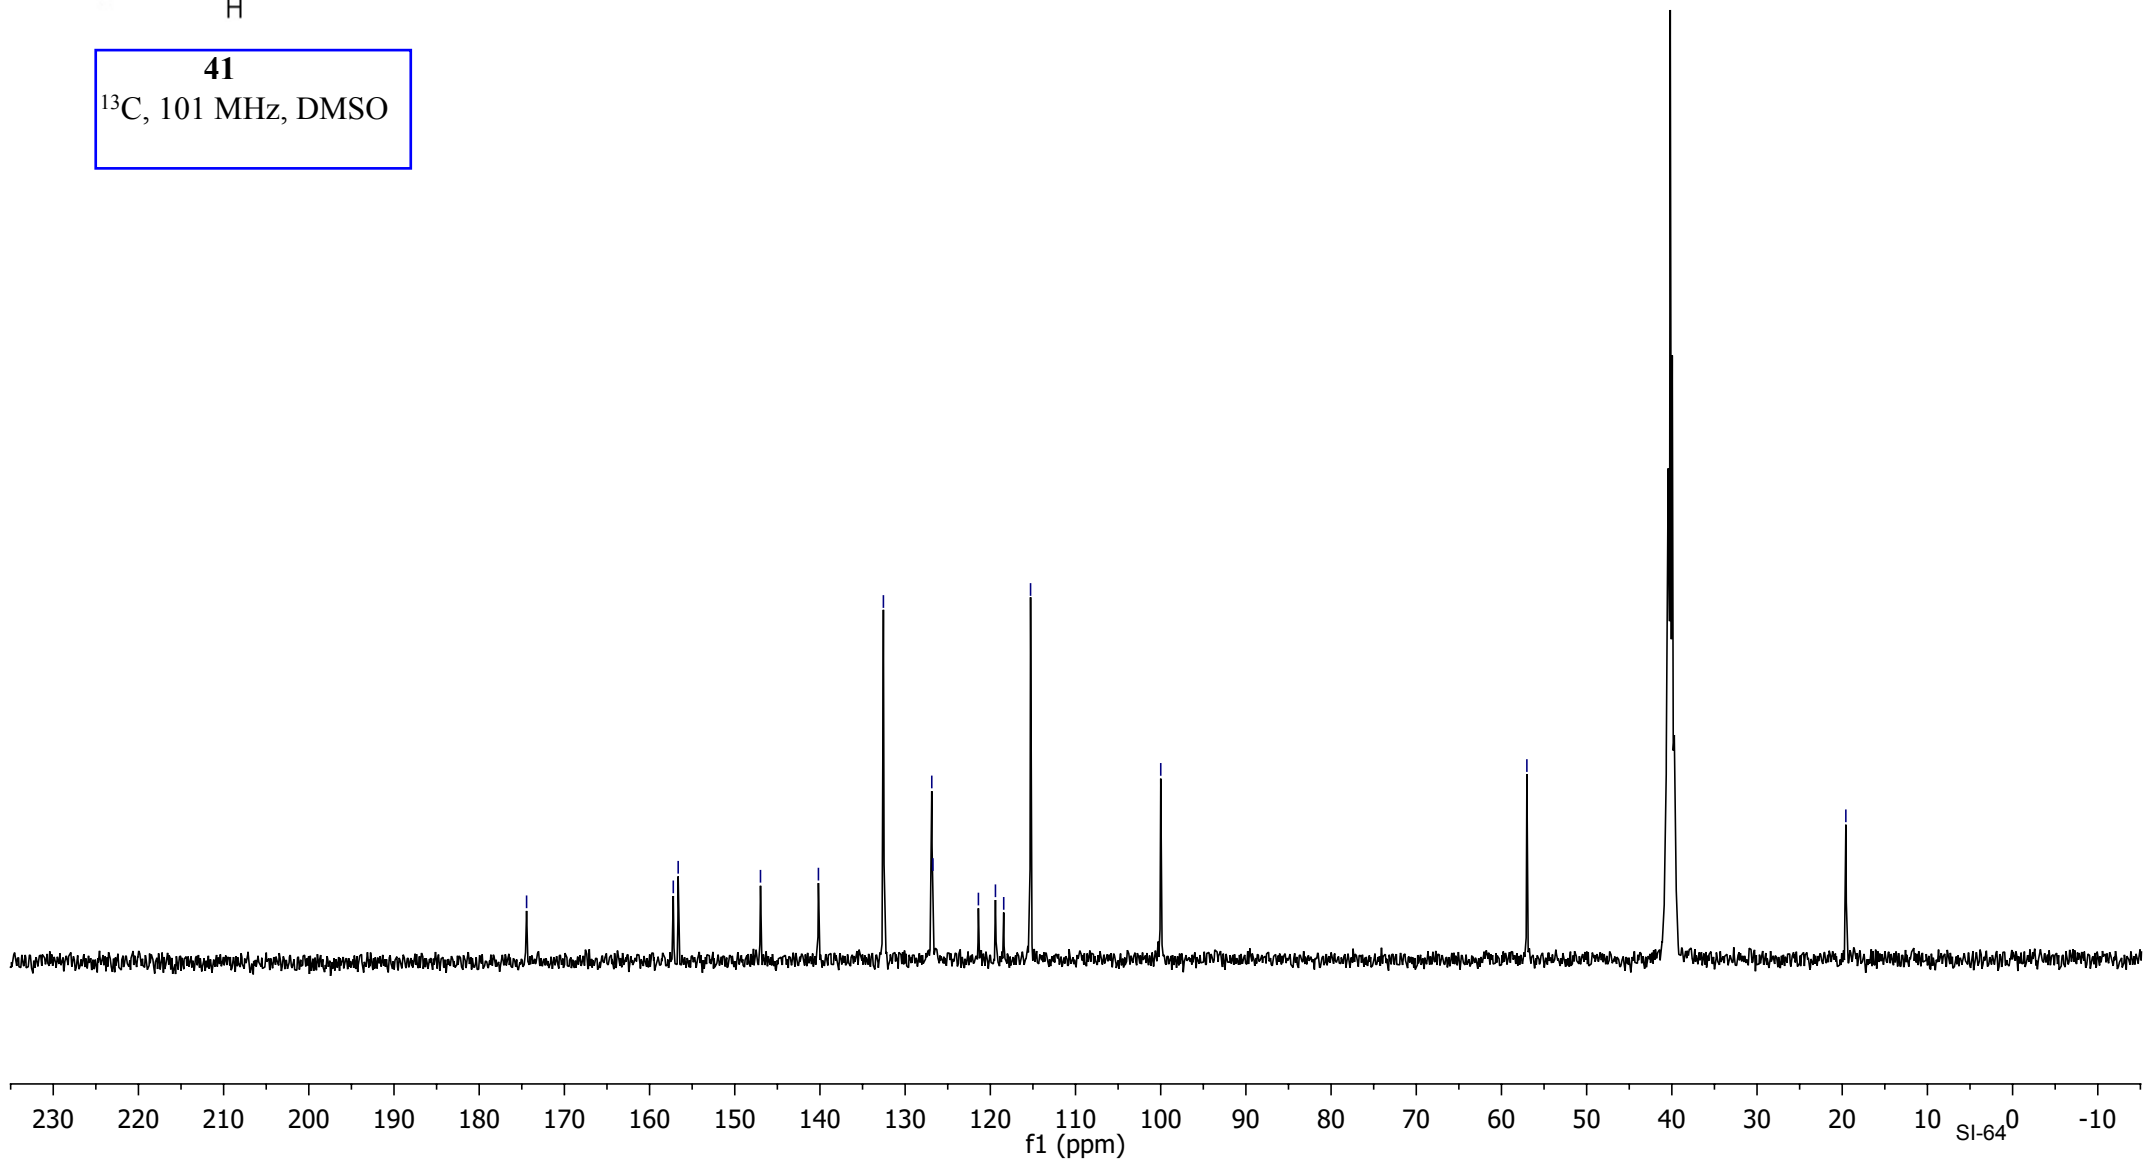

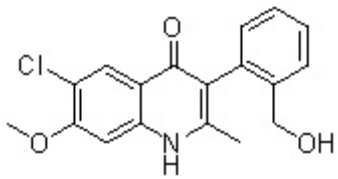

**42**  
<sup>1</sup>H, 400 MHz, DMSO

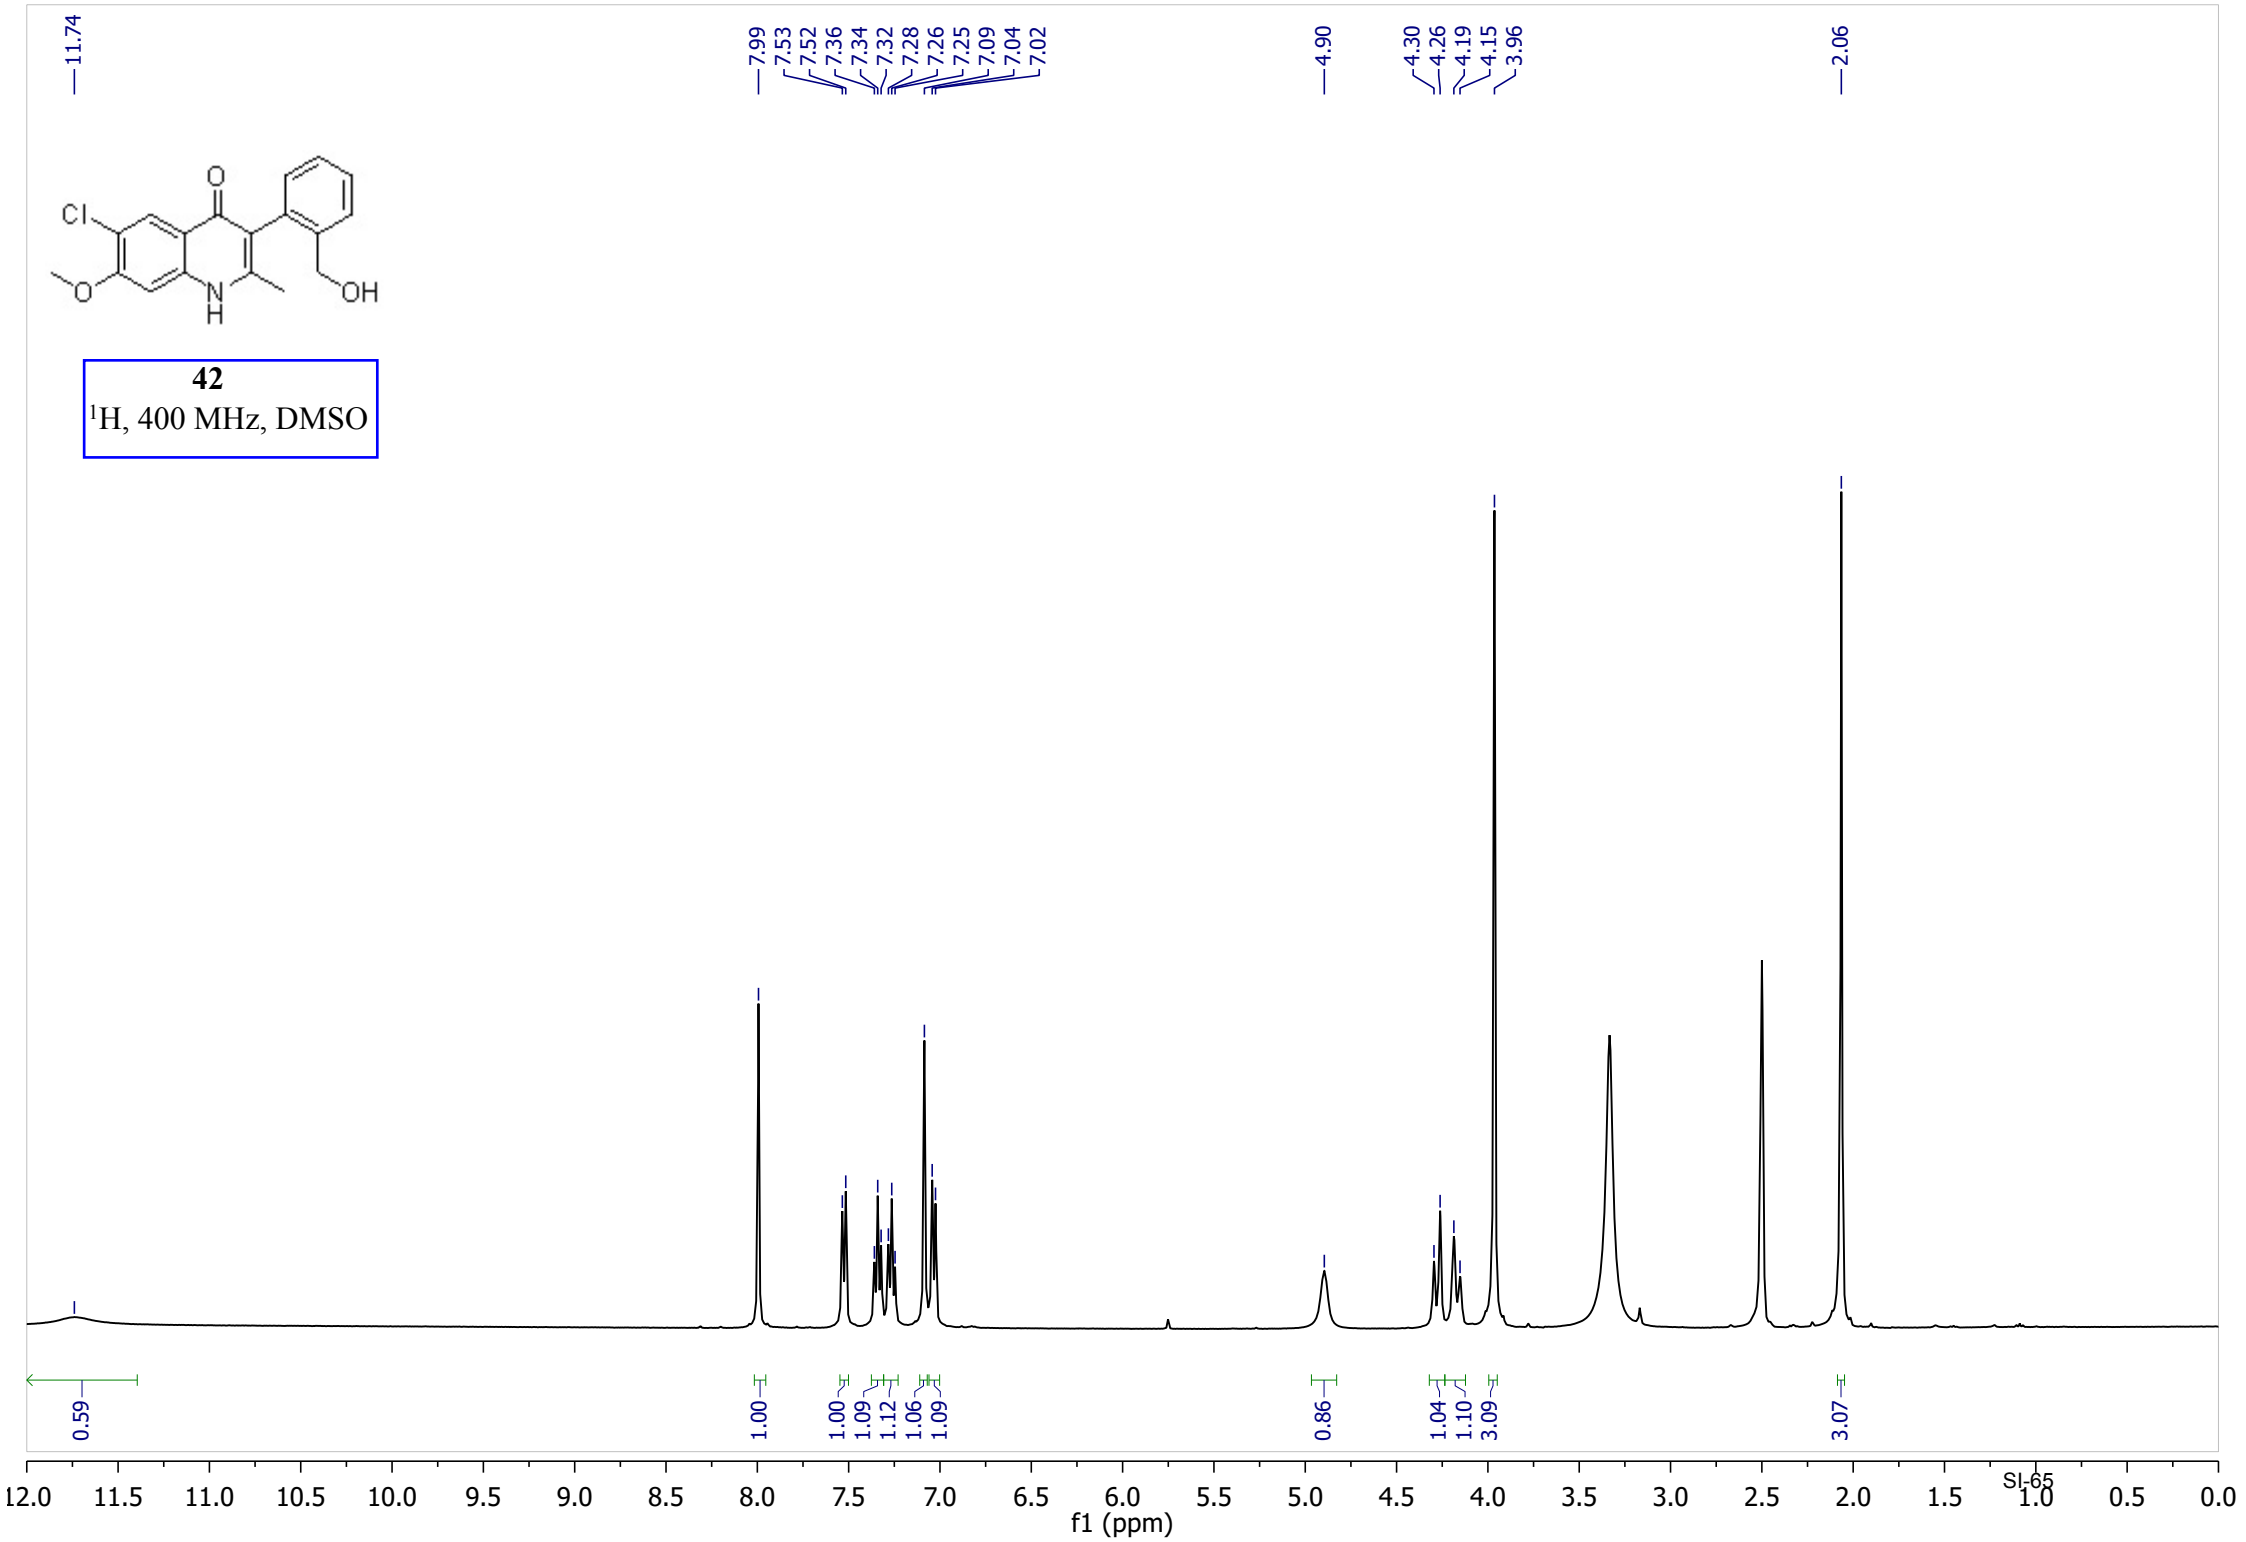



**42**  
<sup>13</sup>C, 101 MHz, DMSO

—173.50  
—156.70  
—147.16  
—141.69  
—139.74  
—134.08  
—130.70  
—127.12  
—126.80  
—126.49  
—126.09  
—119.60  
—118.49  
—118.11

—99.51

—61.05  
—56.41

—18.73

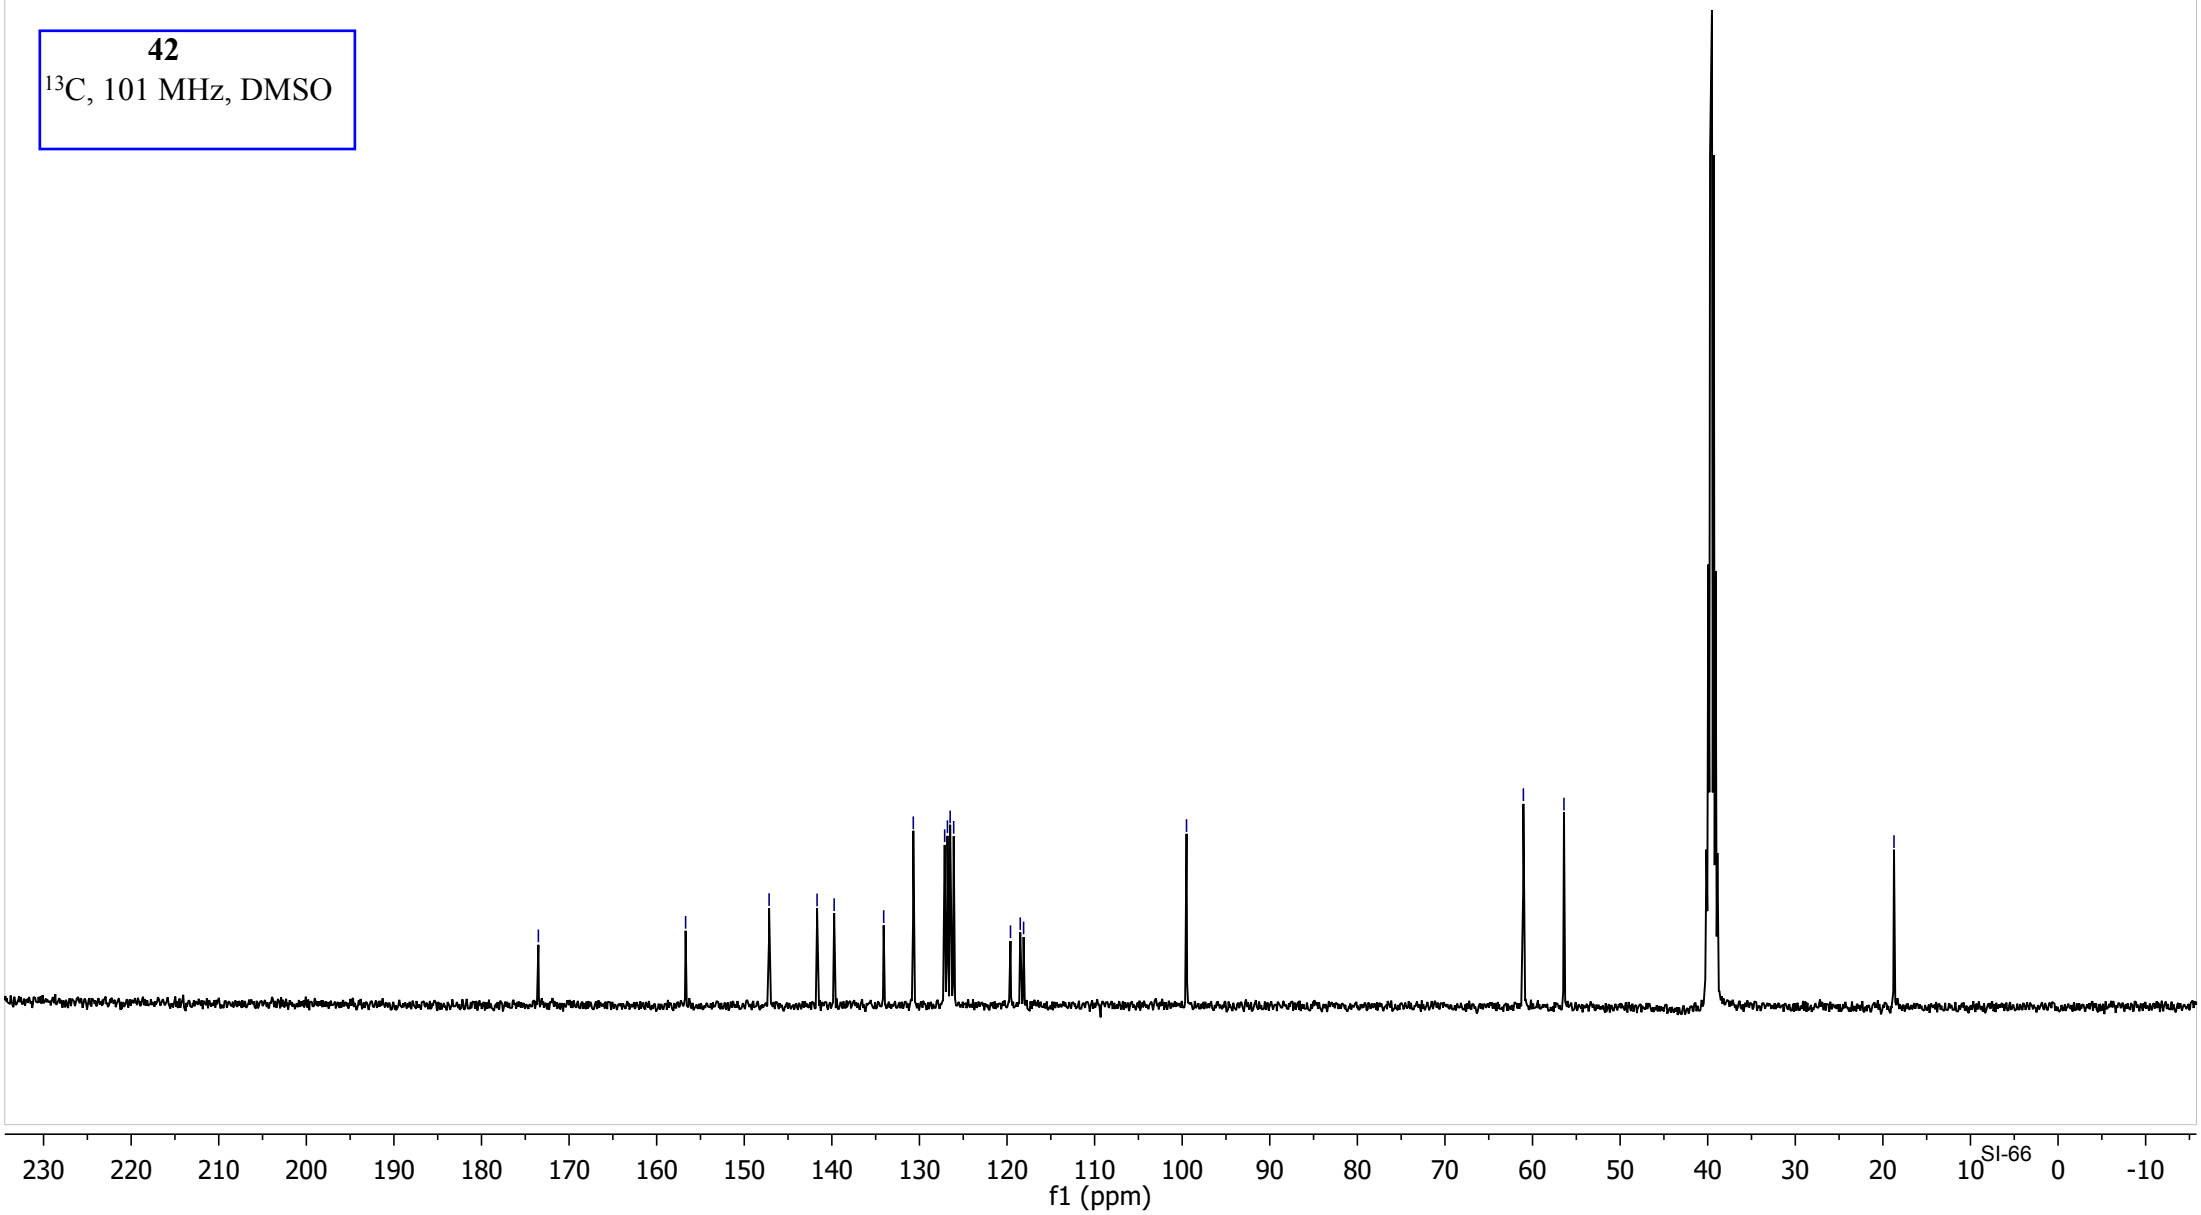

230 220 210 200 190 180 170 160 150 140 130 120 110 100 90 80 70 60 50 40 30 20 10<sup>SI-66</sup> 0 -10

f1 (ppm)

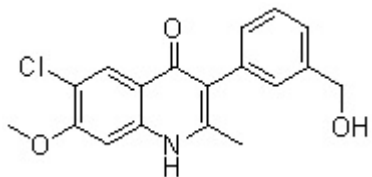

**43**  
<sup>1</sup>H, 250 MHz, DMSO

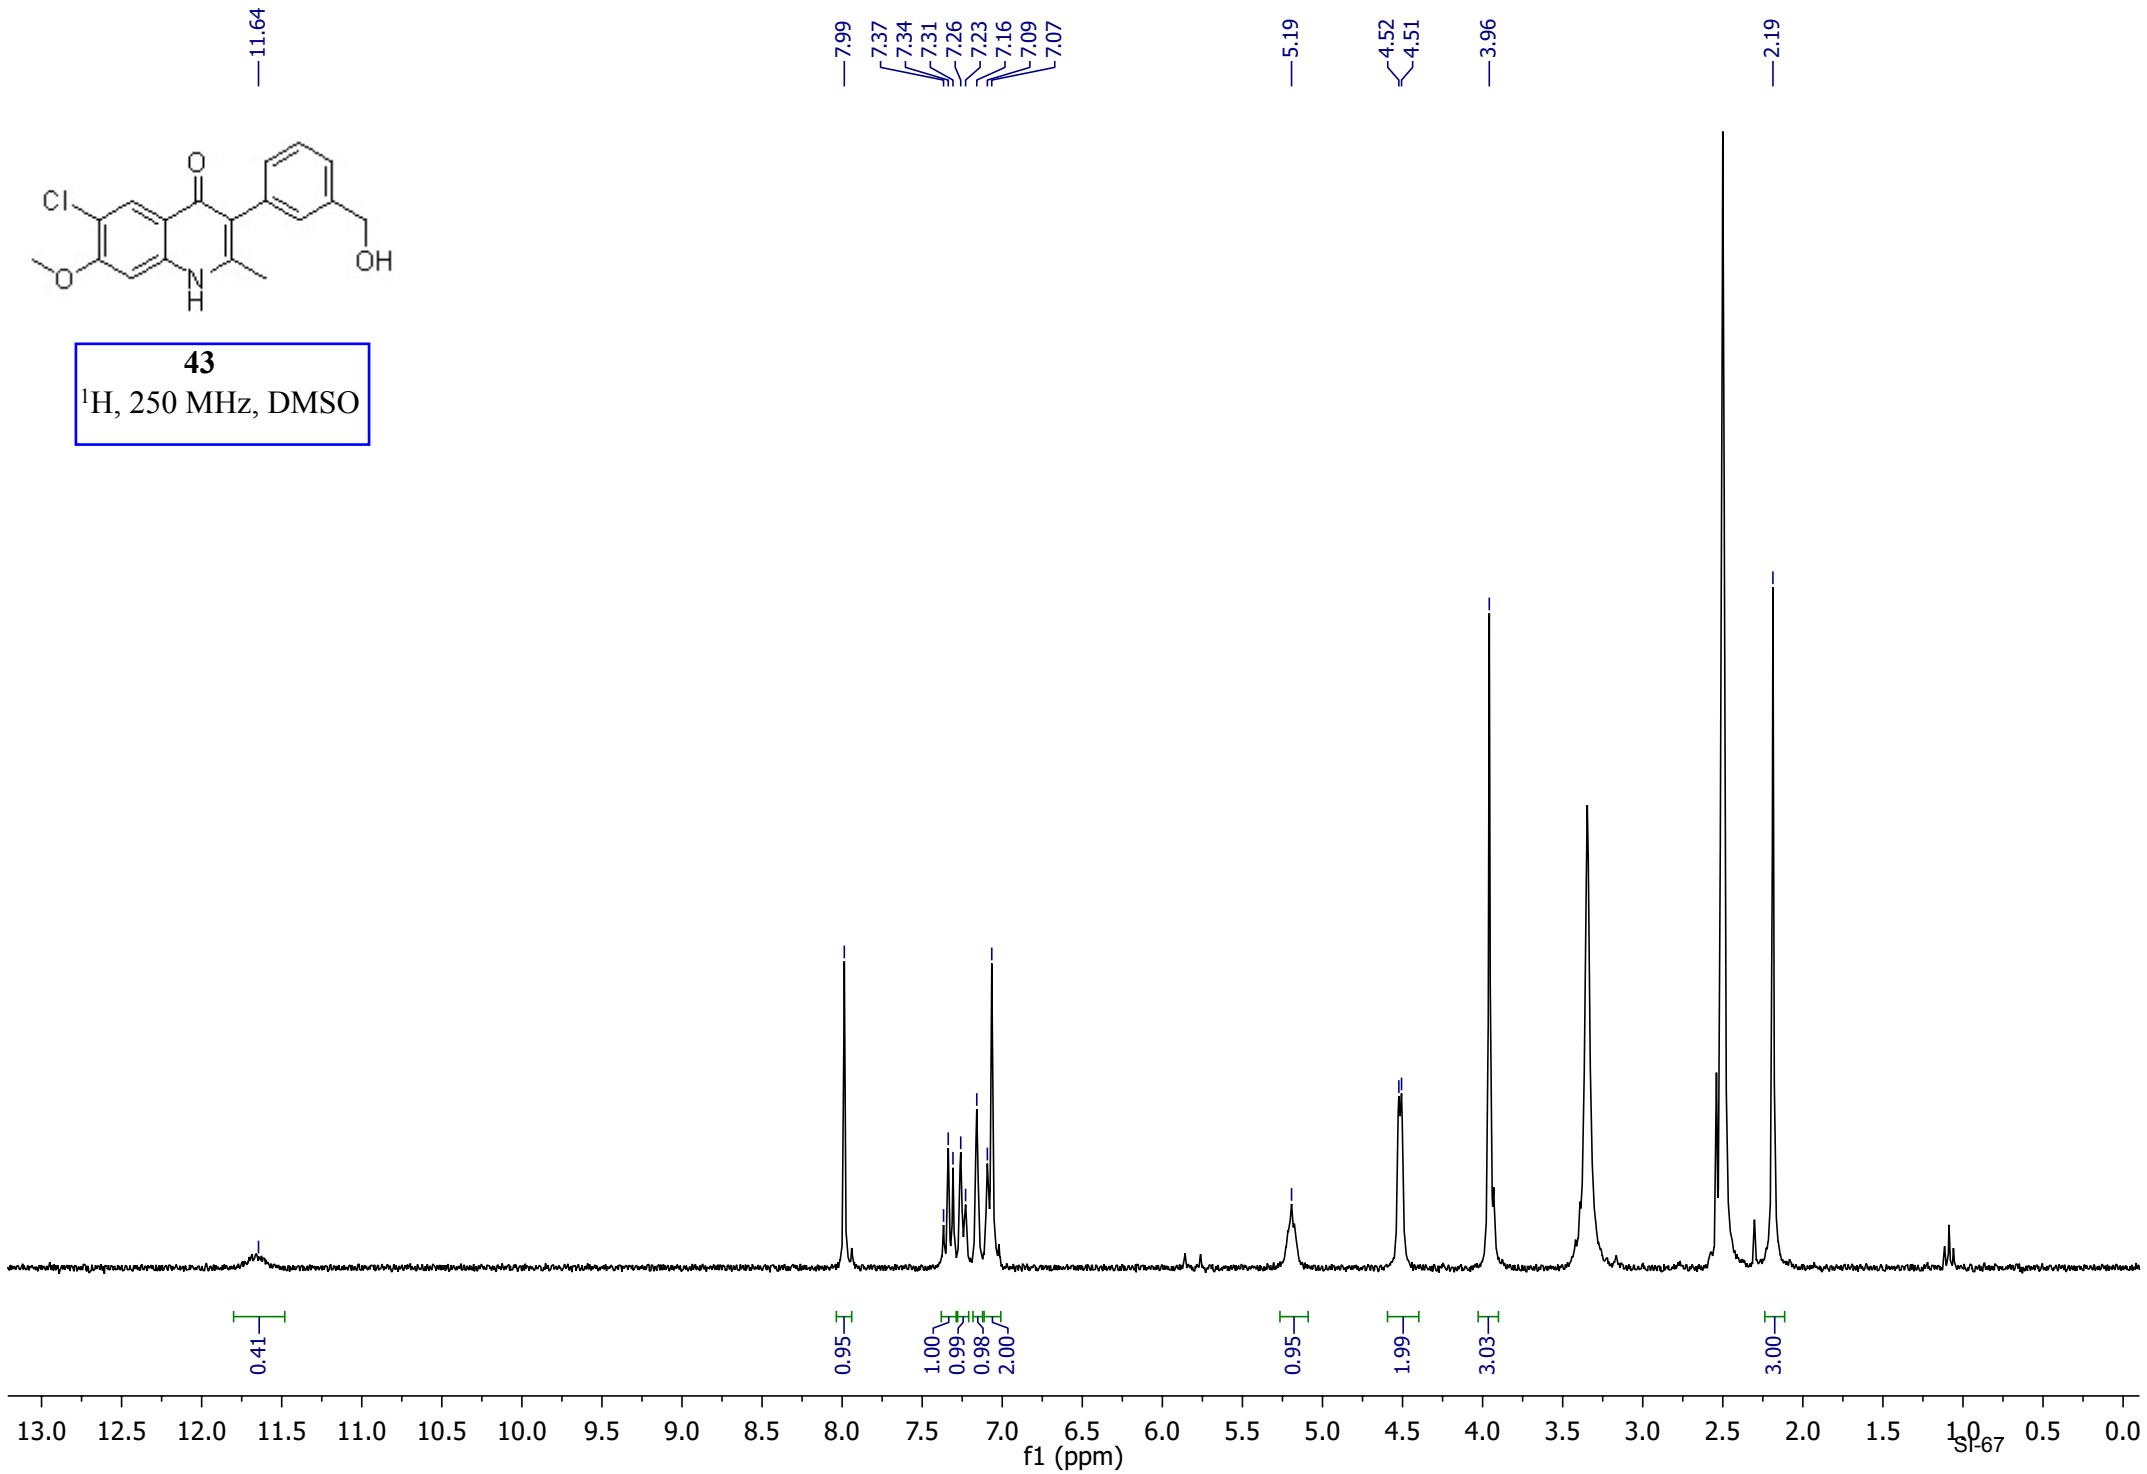

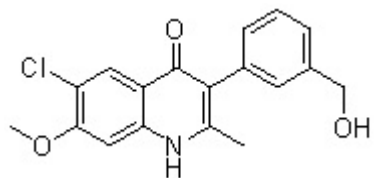

**43**

<sup>13</sup>C, 101 MHz, DMSO

—174.19

—157.30

—147.08

—142.64

—140.29

—136.30

—129.90

—129.69

—128.18

—126.83

—125.41

—121.60

—119.46

—118.57

—100.11

—63.62

—57.03

—19.53

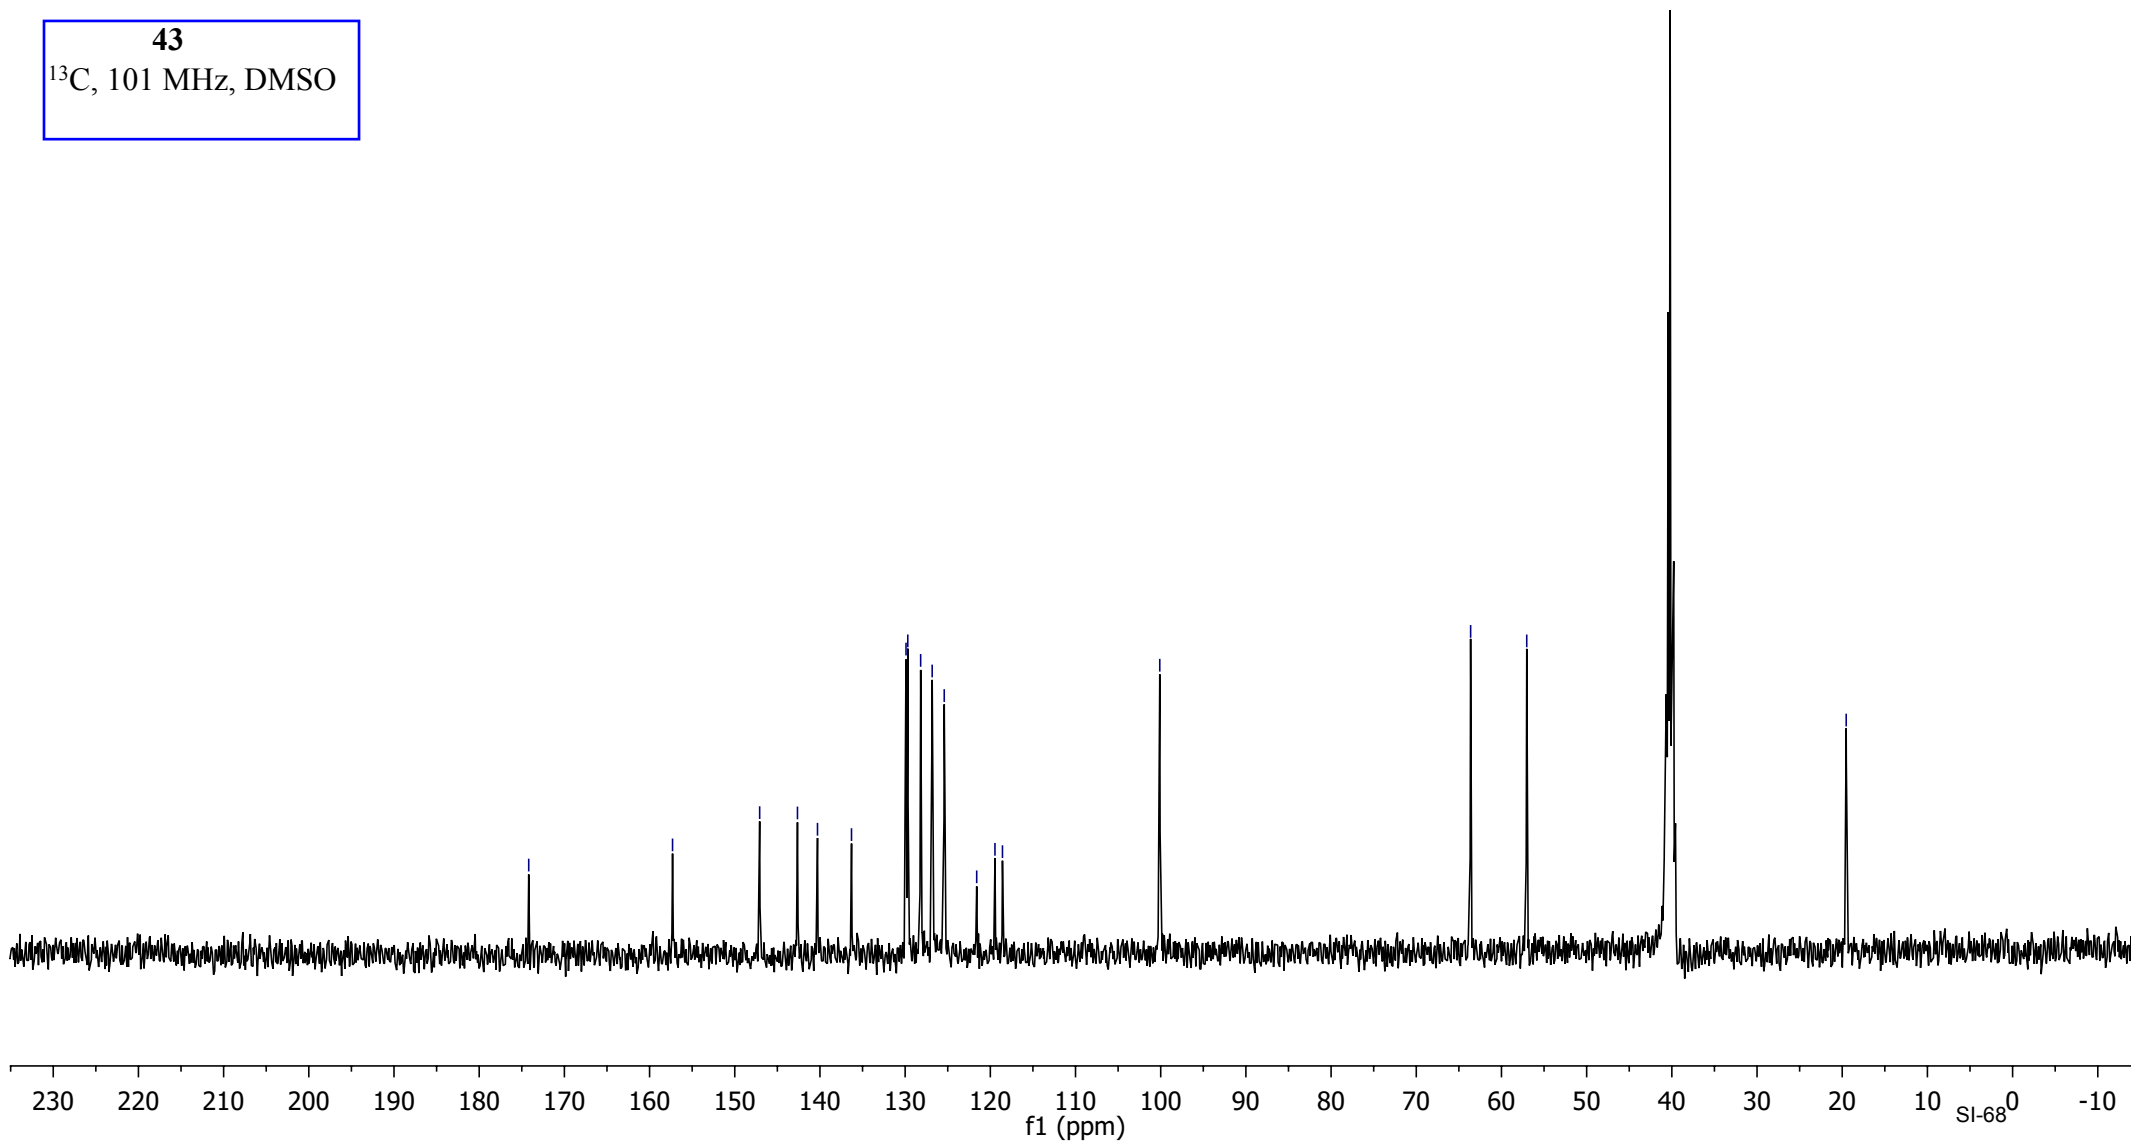

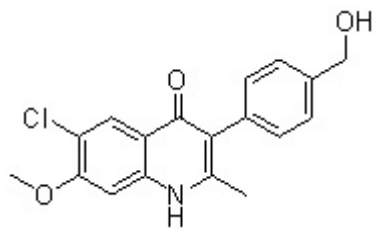

44

$^1\text{H}$ , 400 MHz, DMSO

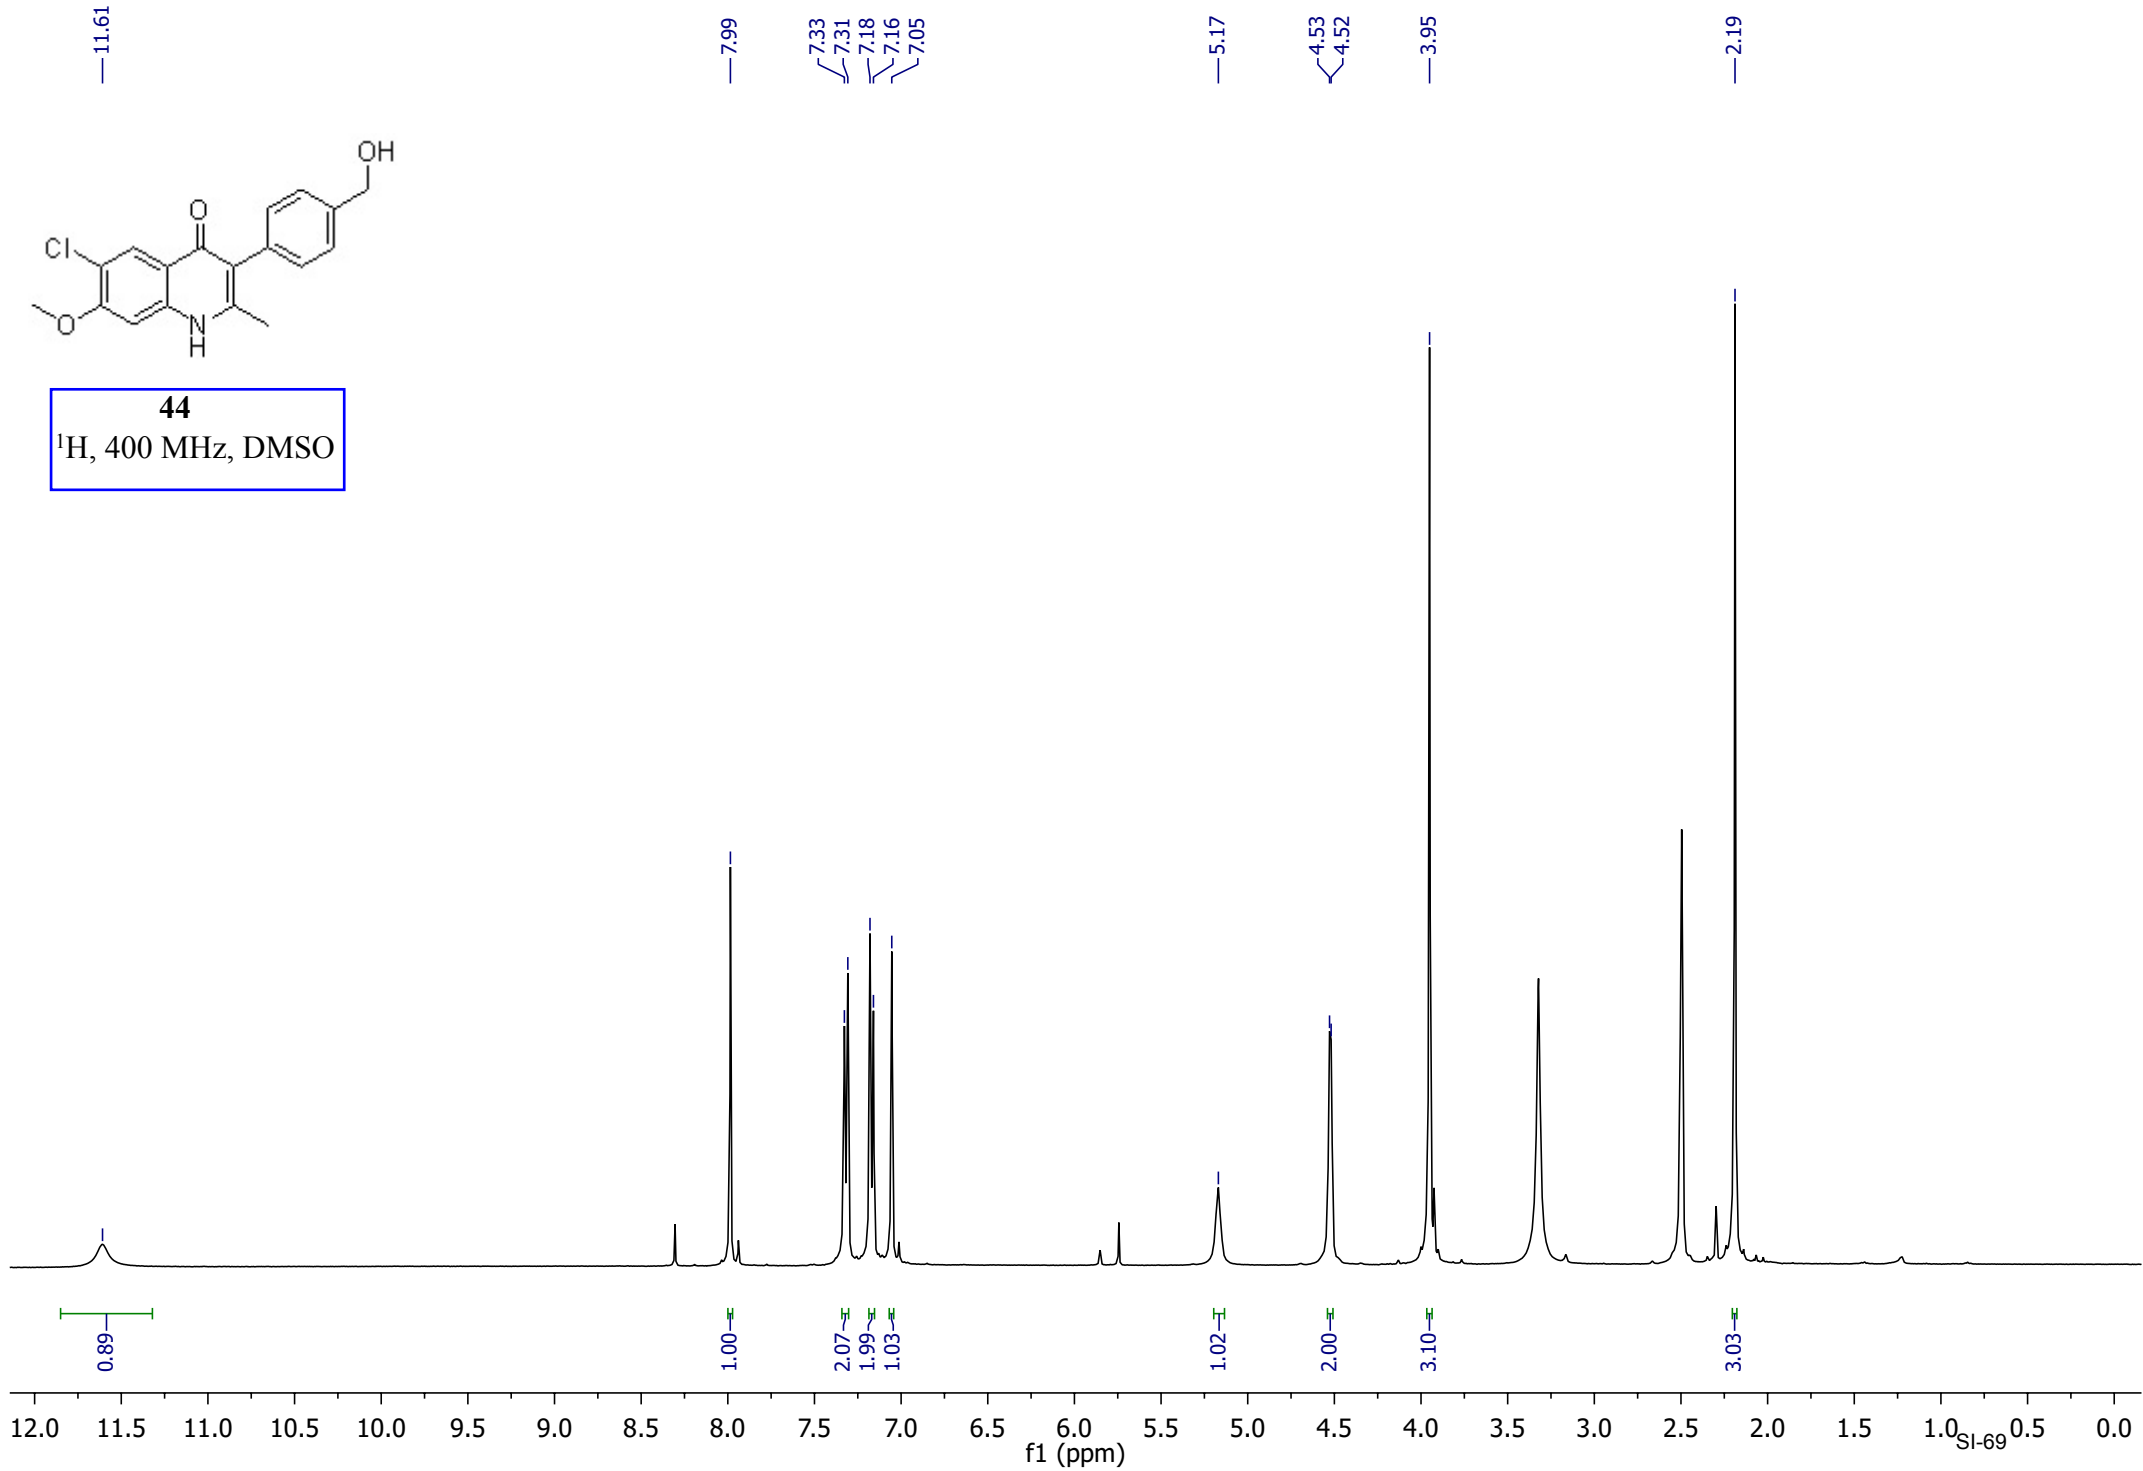

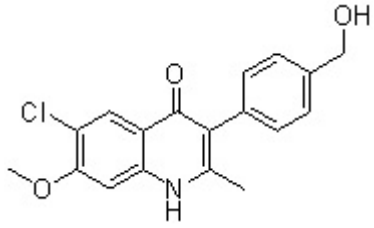

**44**  
<sup>13</sup>C, 101 MHz, DMSO

—173.56  
—156.62  
~146.37  
~140.71  
~139.58  
~134.15  
~130.60  
~126.17  
~125.94  
~120.70  
~118.77  
~117.89

—99.39

—62.87

—56.34

—18.85

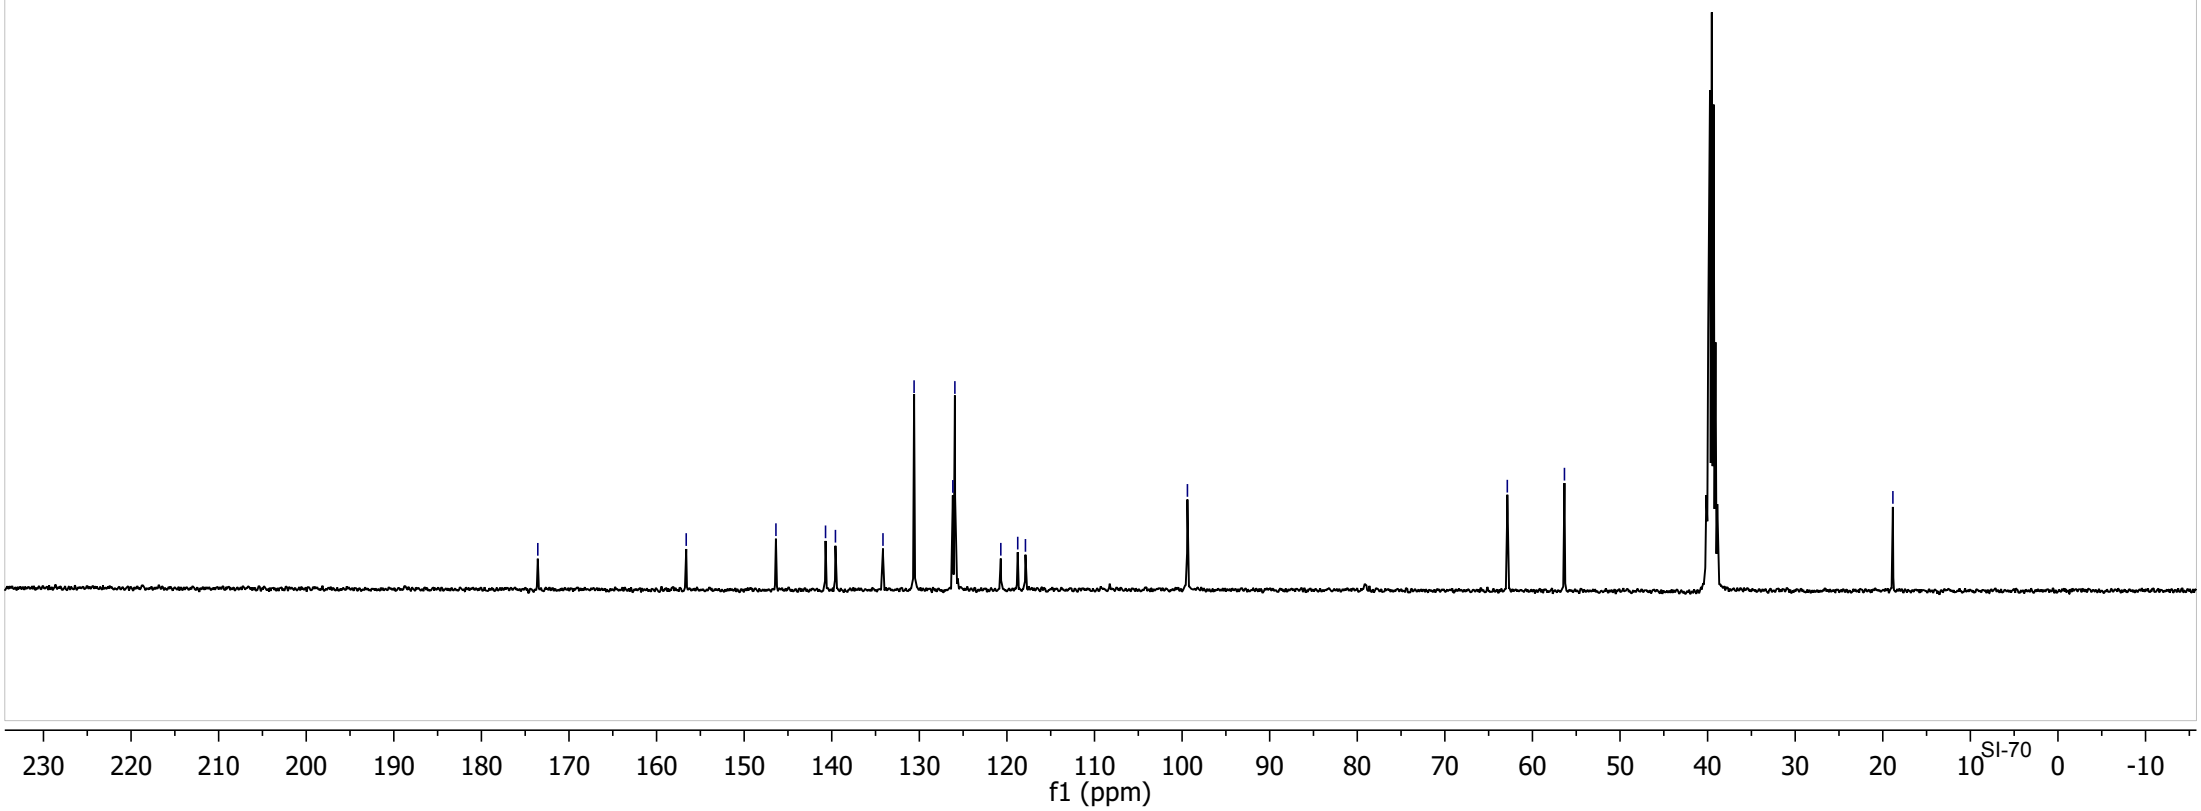

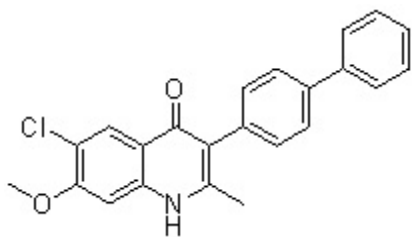

**45**  
<sup>1</sup>H, 400 MHz, DMSO

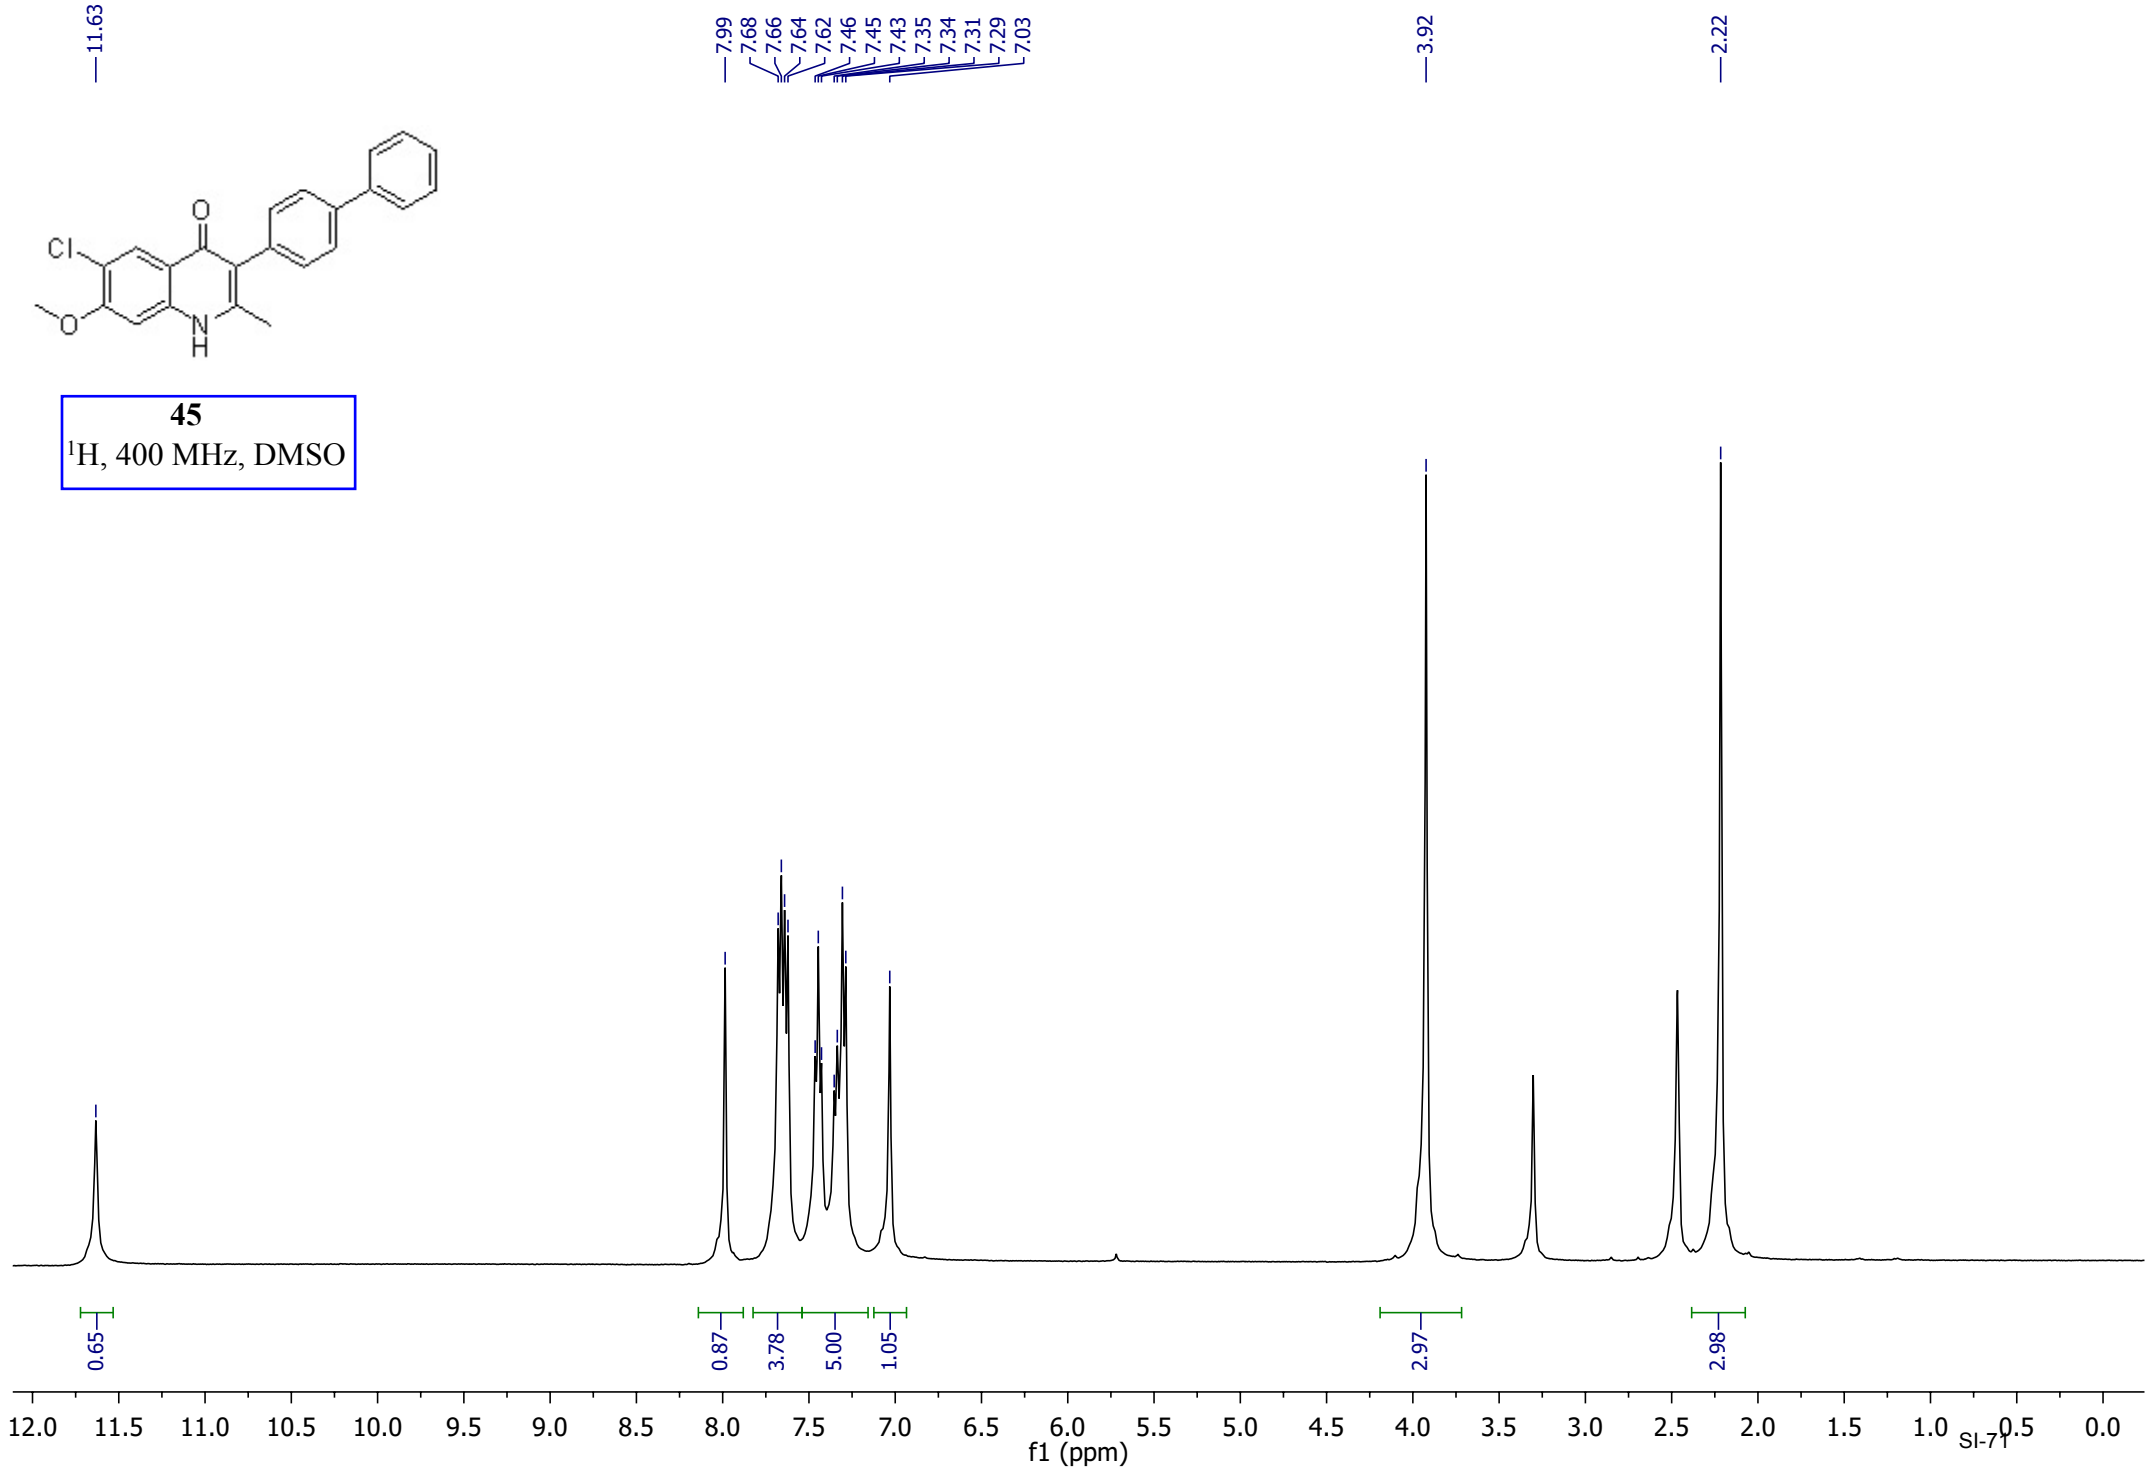



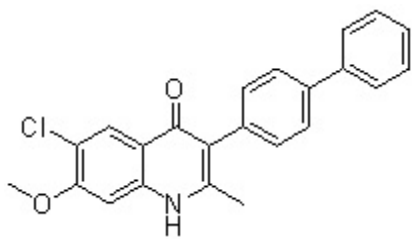

**45**  
<sup>13</sup>C, 101 MHz, DMSO

—174.21

—157.36

—147.21

—140.75

—140.26

—138.98

—135.73

—132.22

—129.61

—127.97

—127.23

—126.87

—126.70

—120.95

—119.44

—118.68

—100.10

—57.05

—19.61

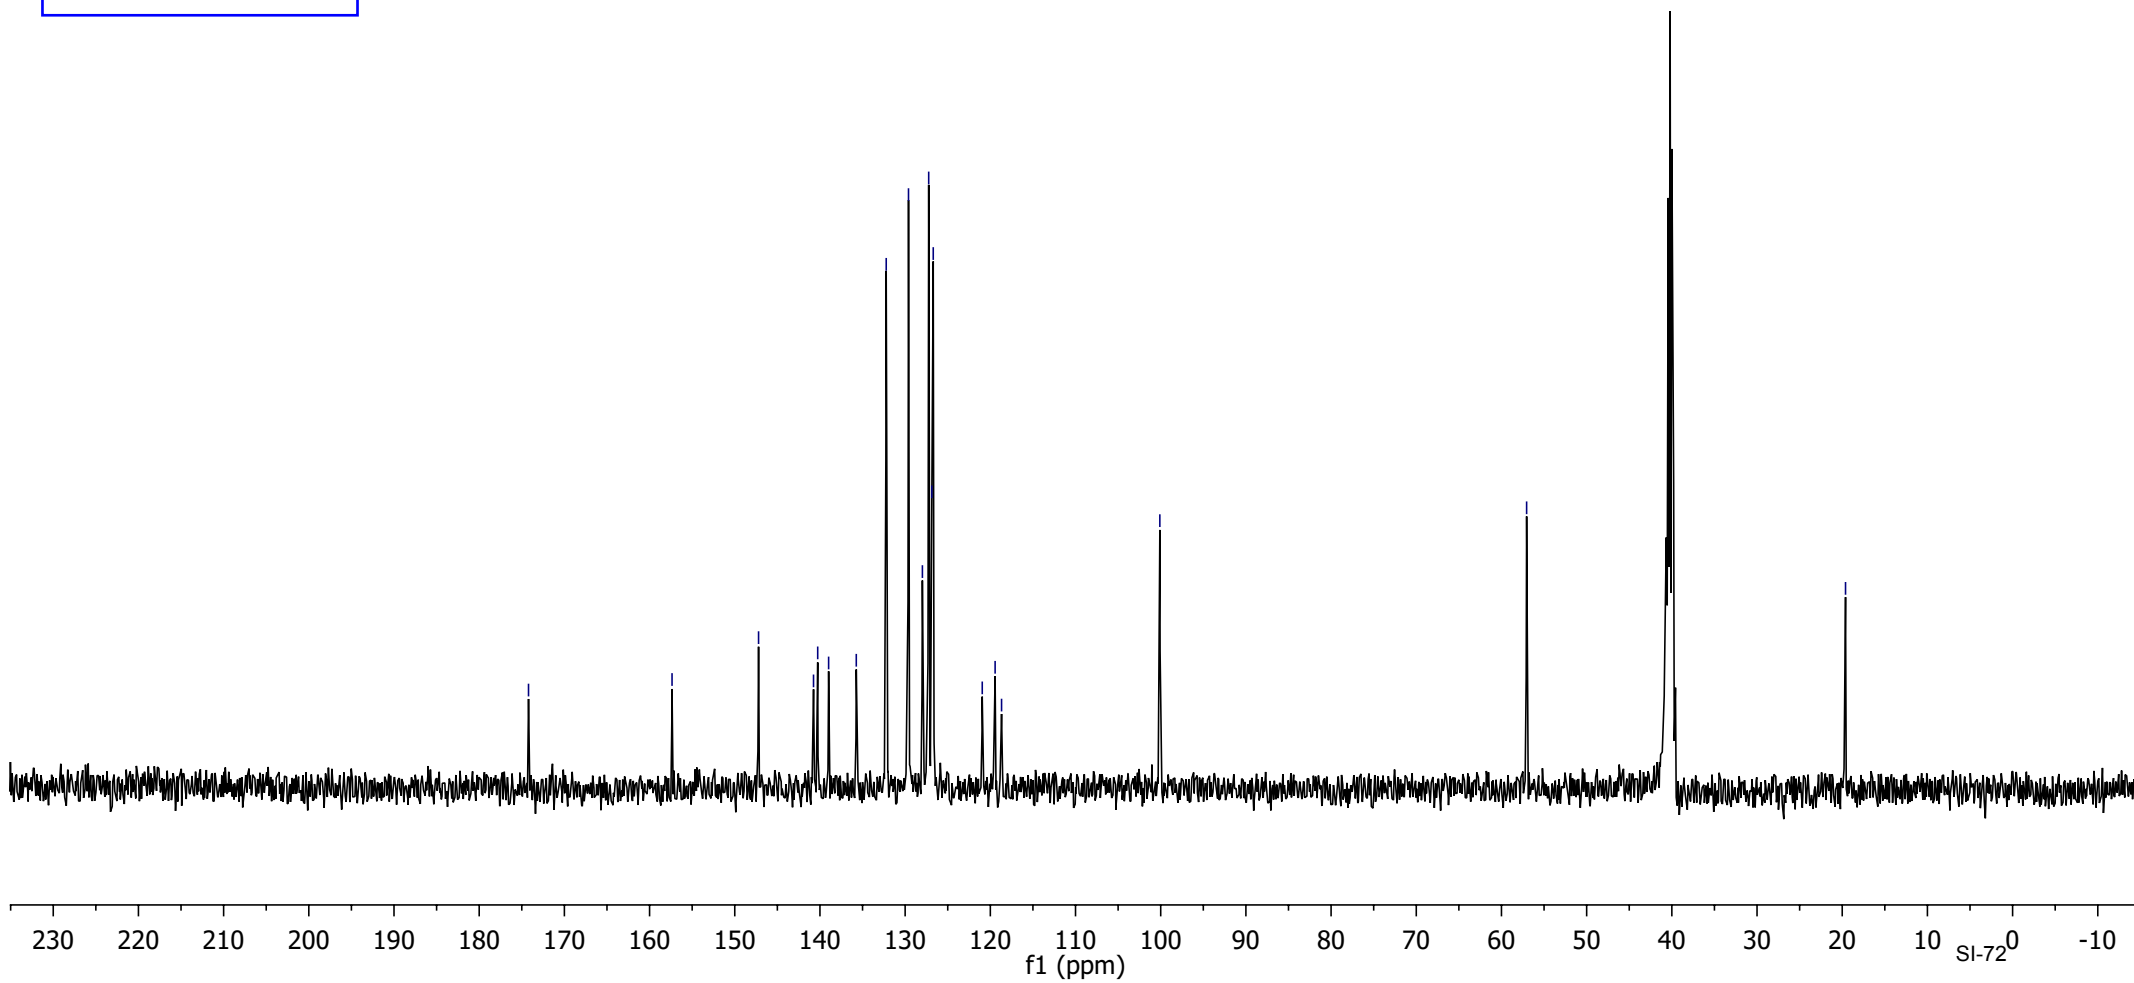

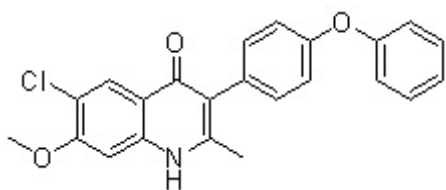

**46**

<sup>1</sup>H, 400 MHz, DMSO

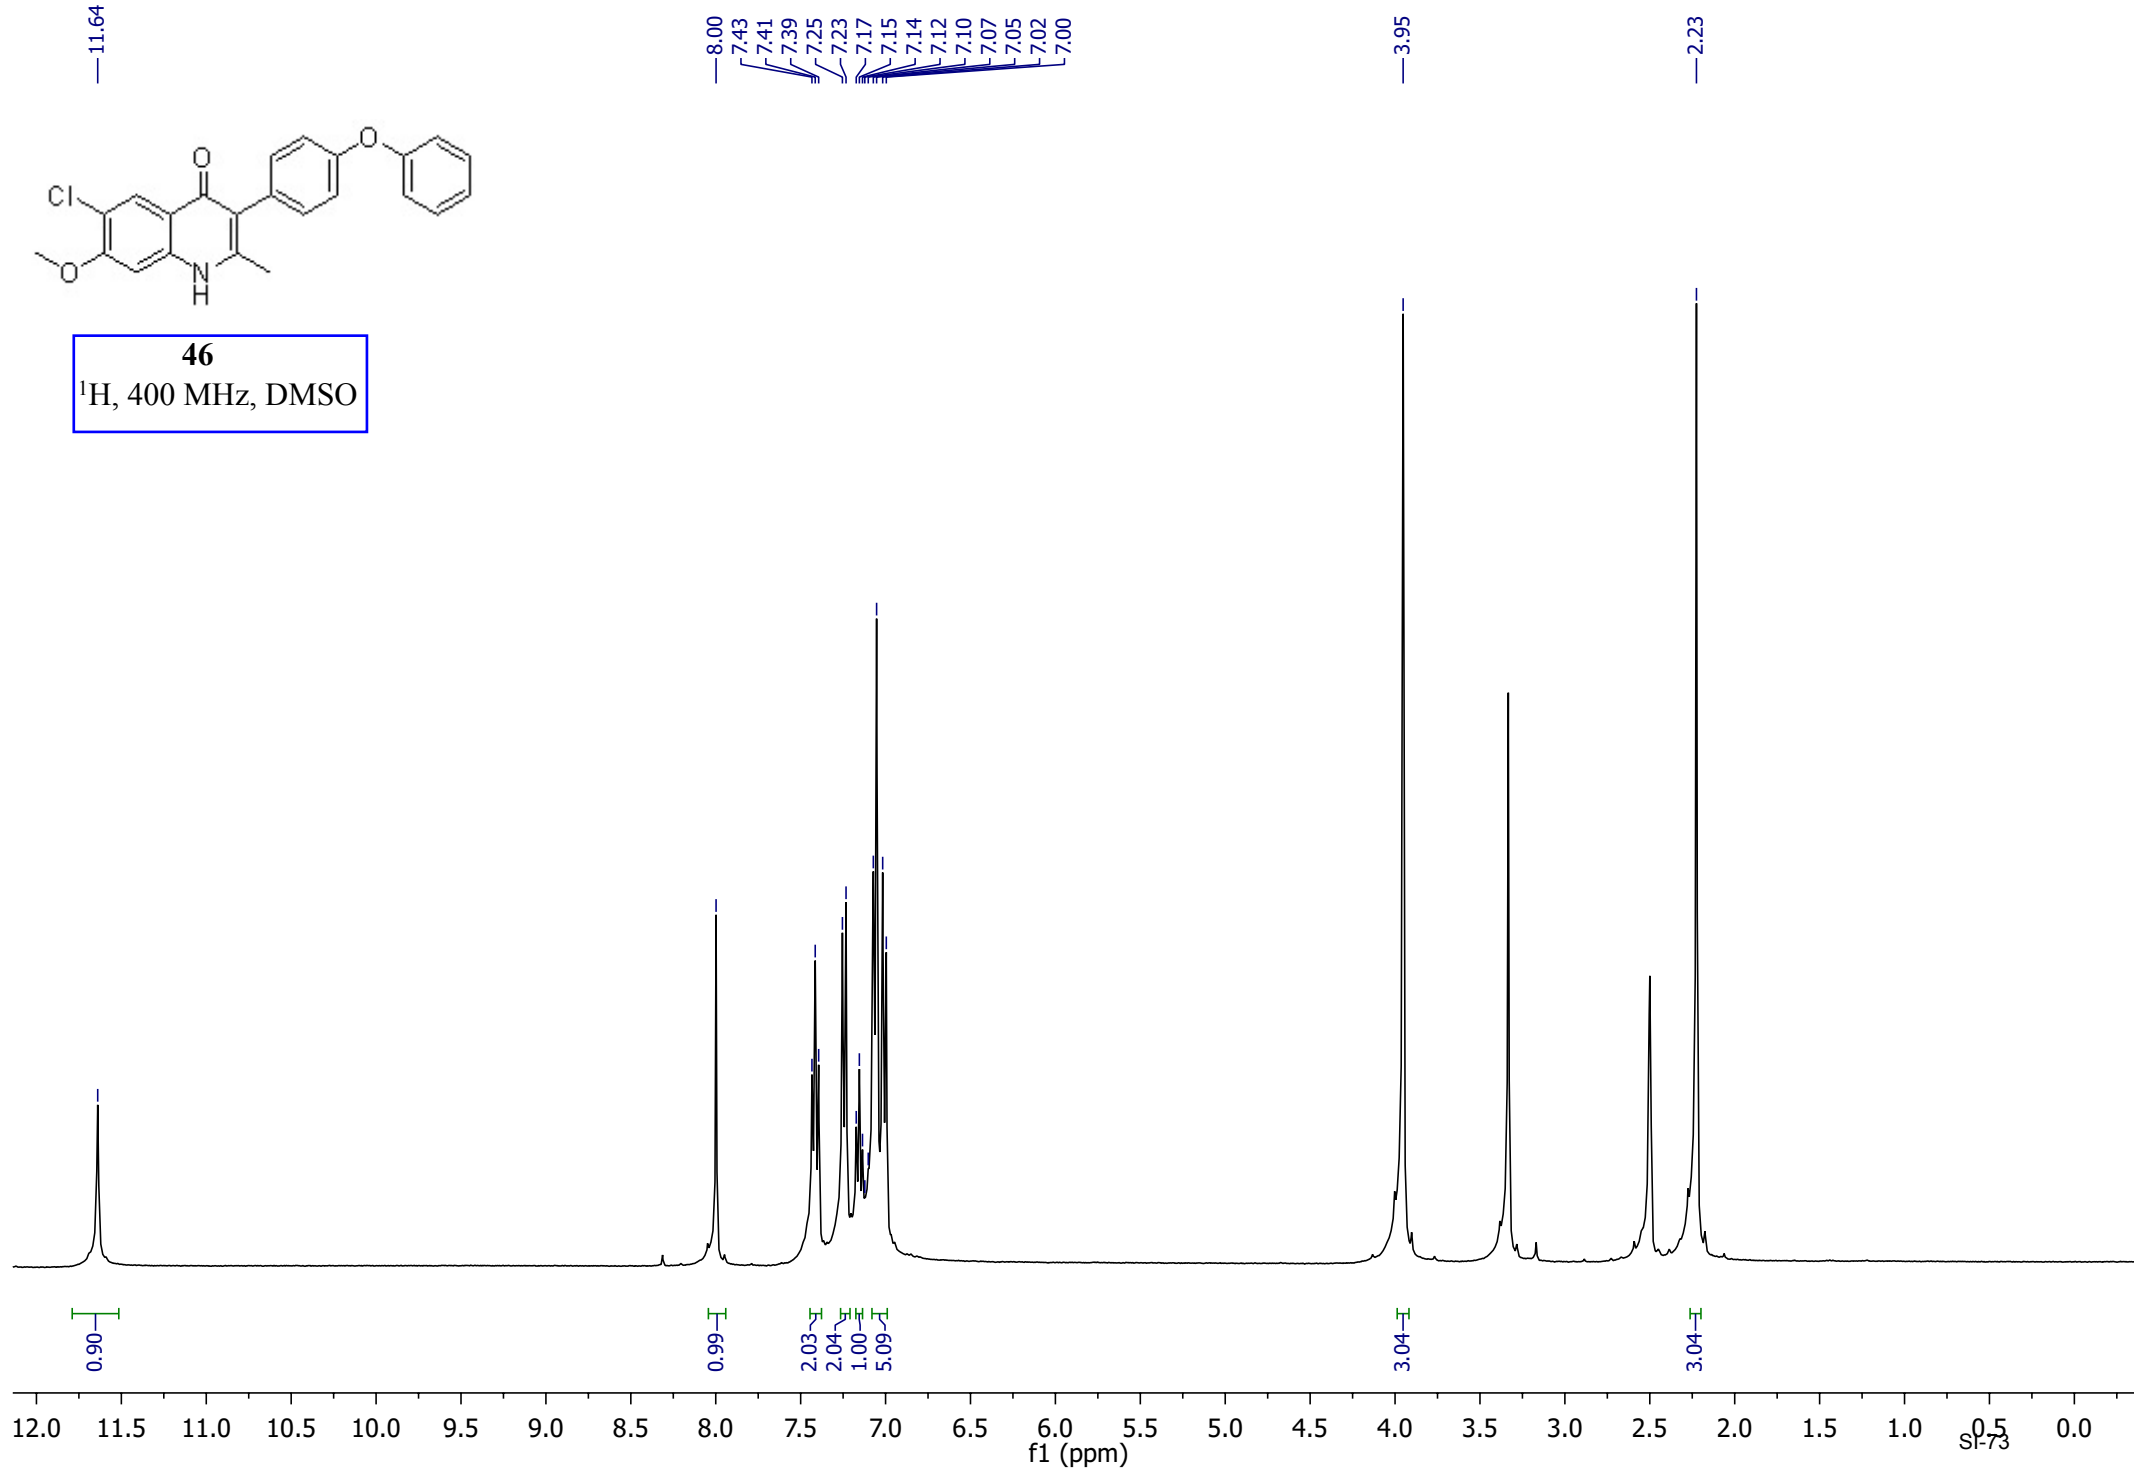

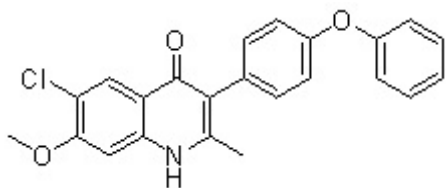

**46**  
<sup>13</sup>C, 101 MHz, DMSO

—173.53

—156.64  
—155.31

—146.54

—139.55

—132.52

—130.80

—130.02

—126.15

—123.43

—120.00

—118.71

—117.94

—99.38

—56.35

—18.90

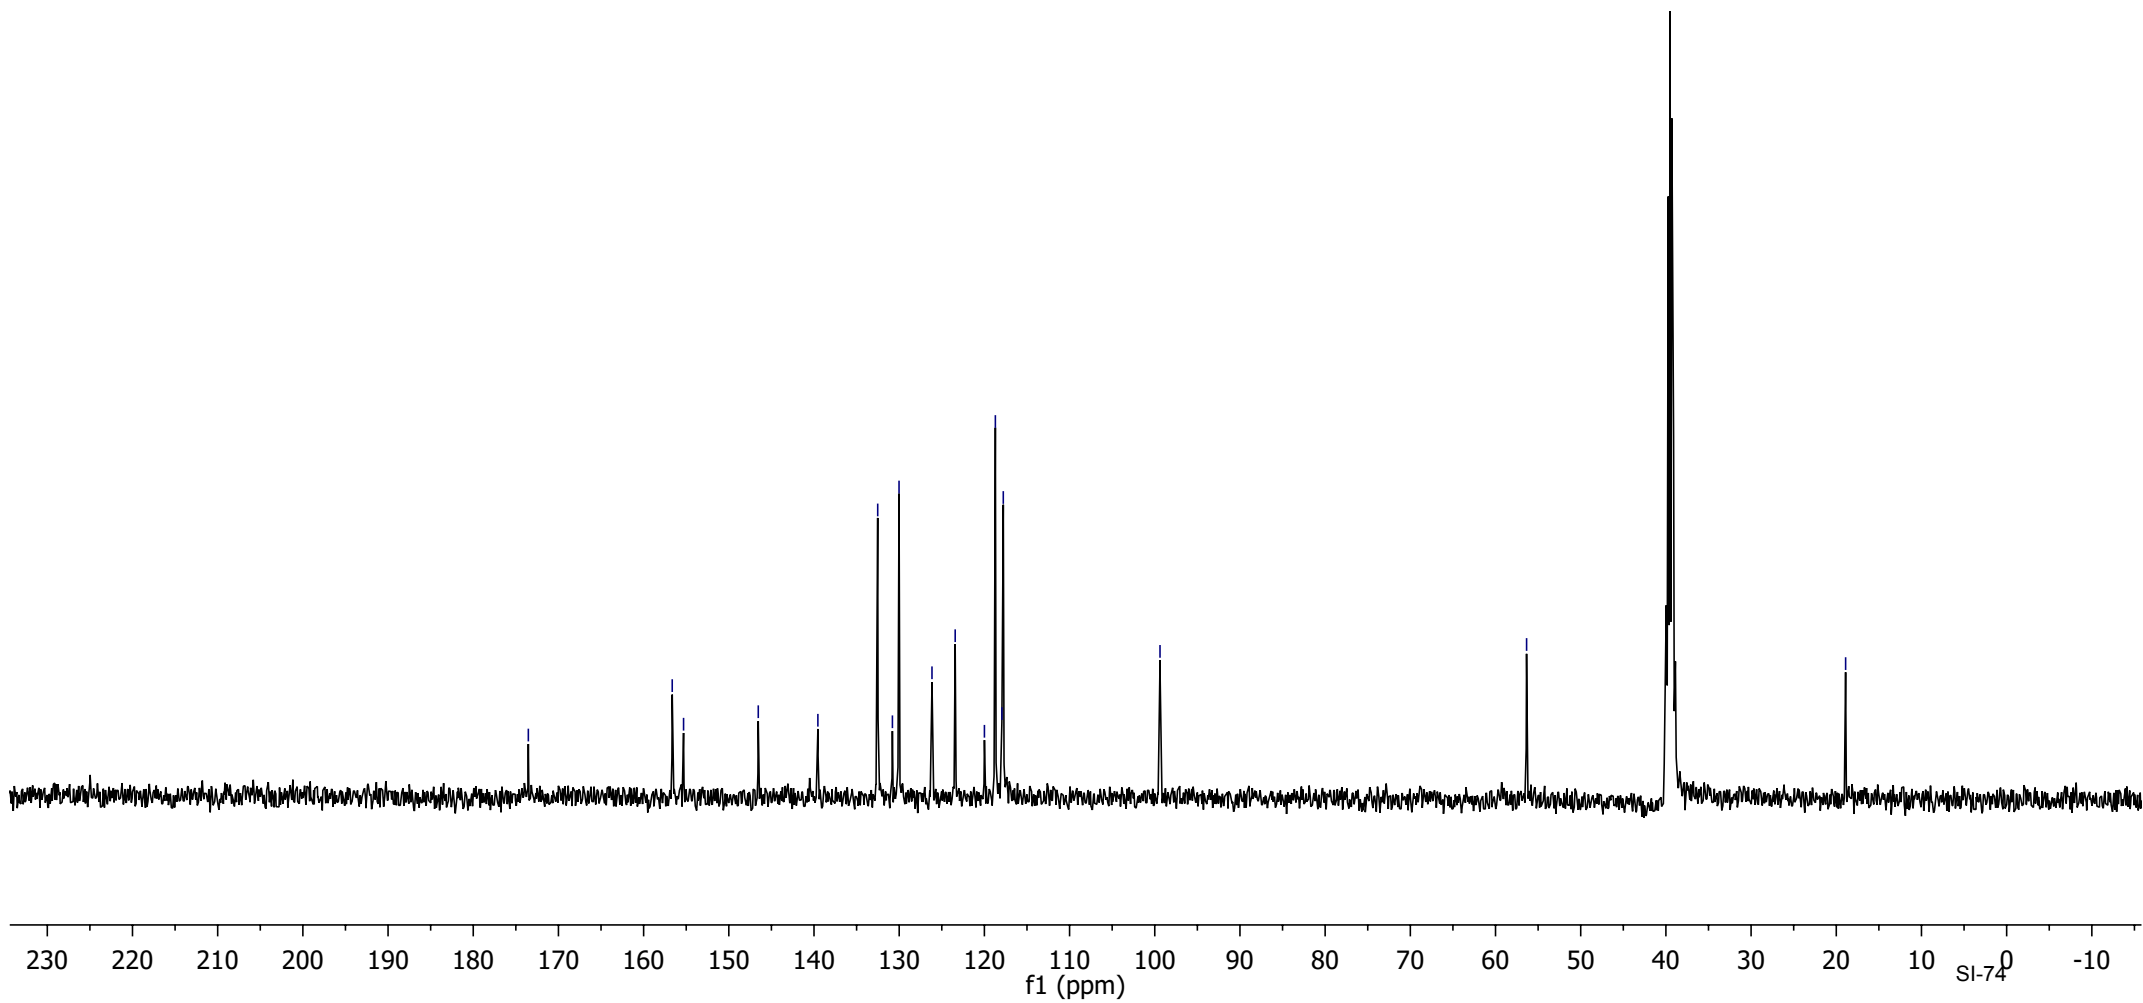

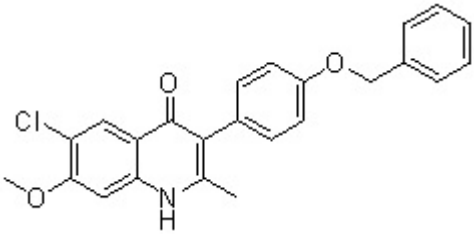

**47**  
<sup>1</sup>H, 400 MHz, DMSO

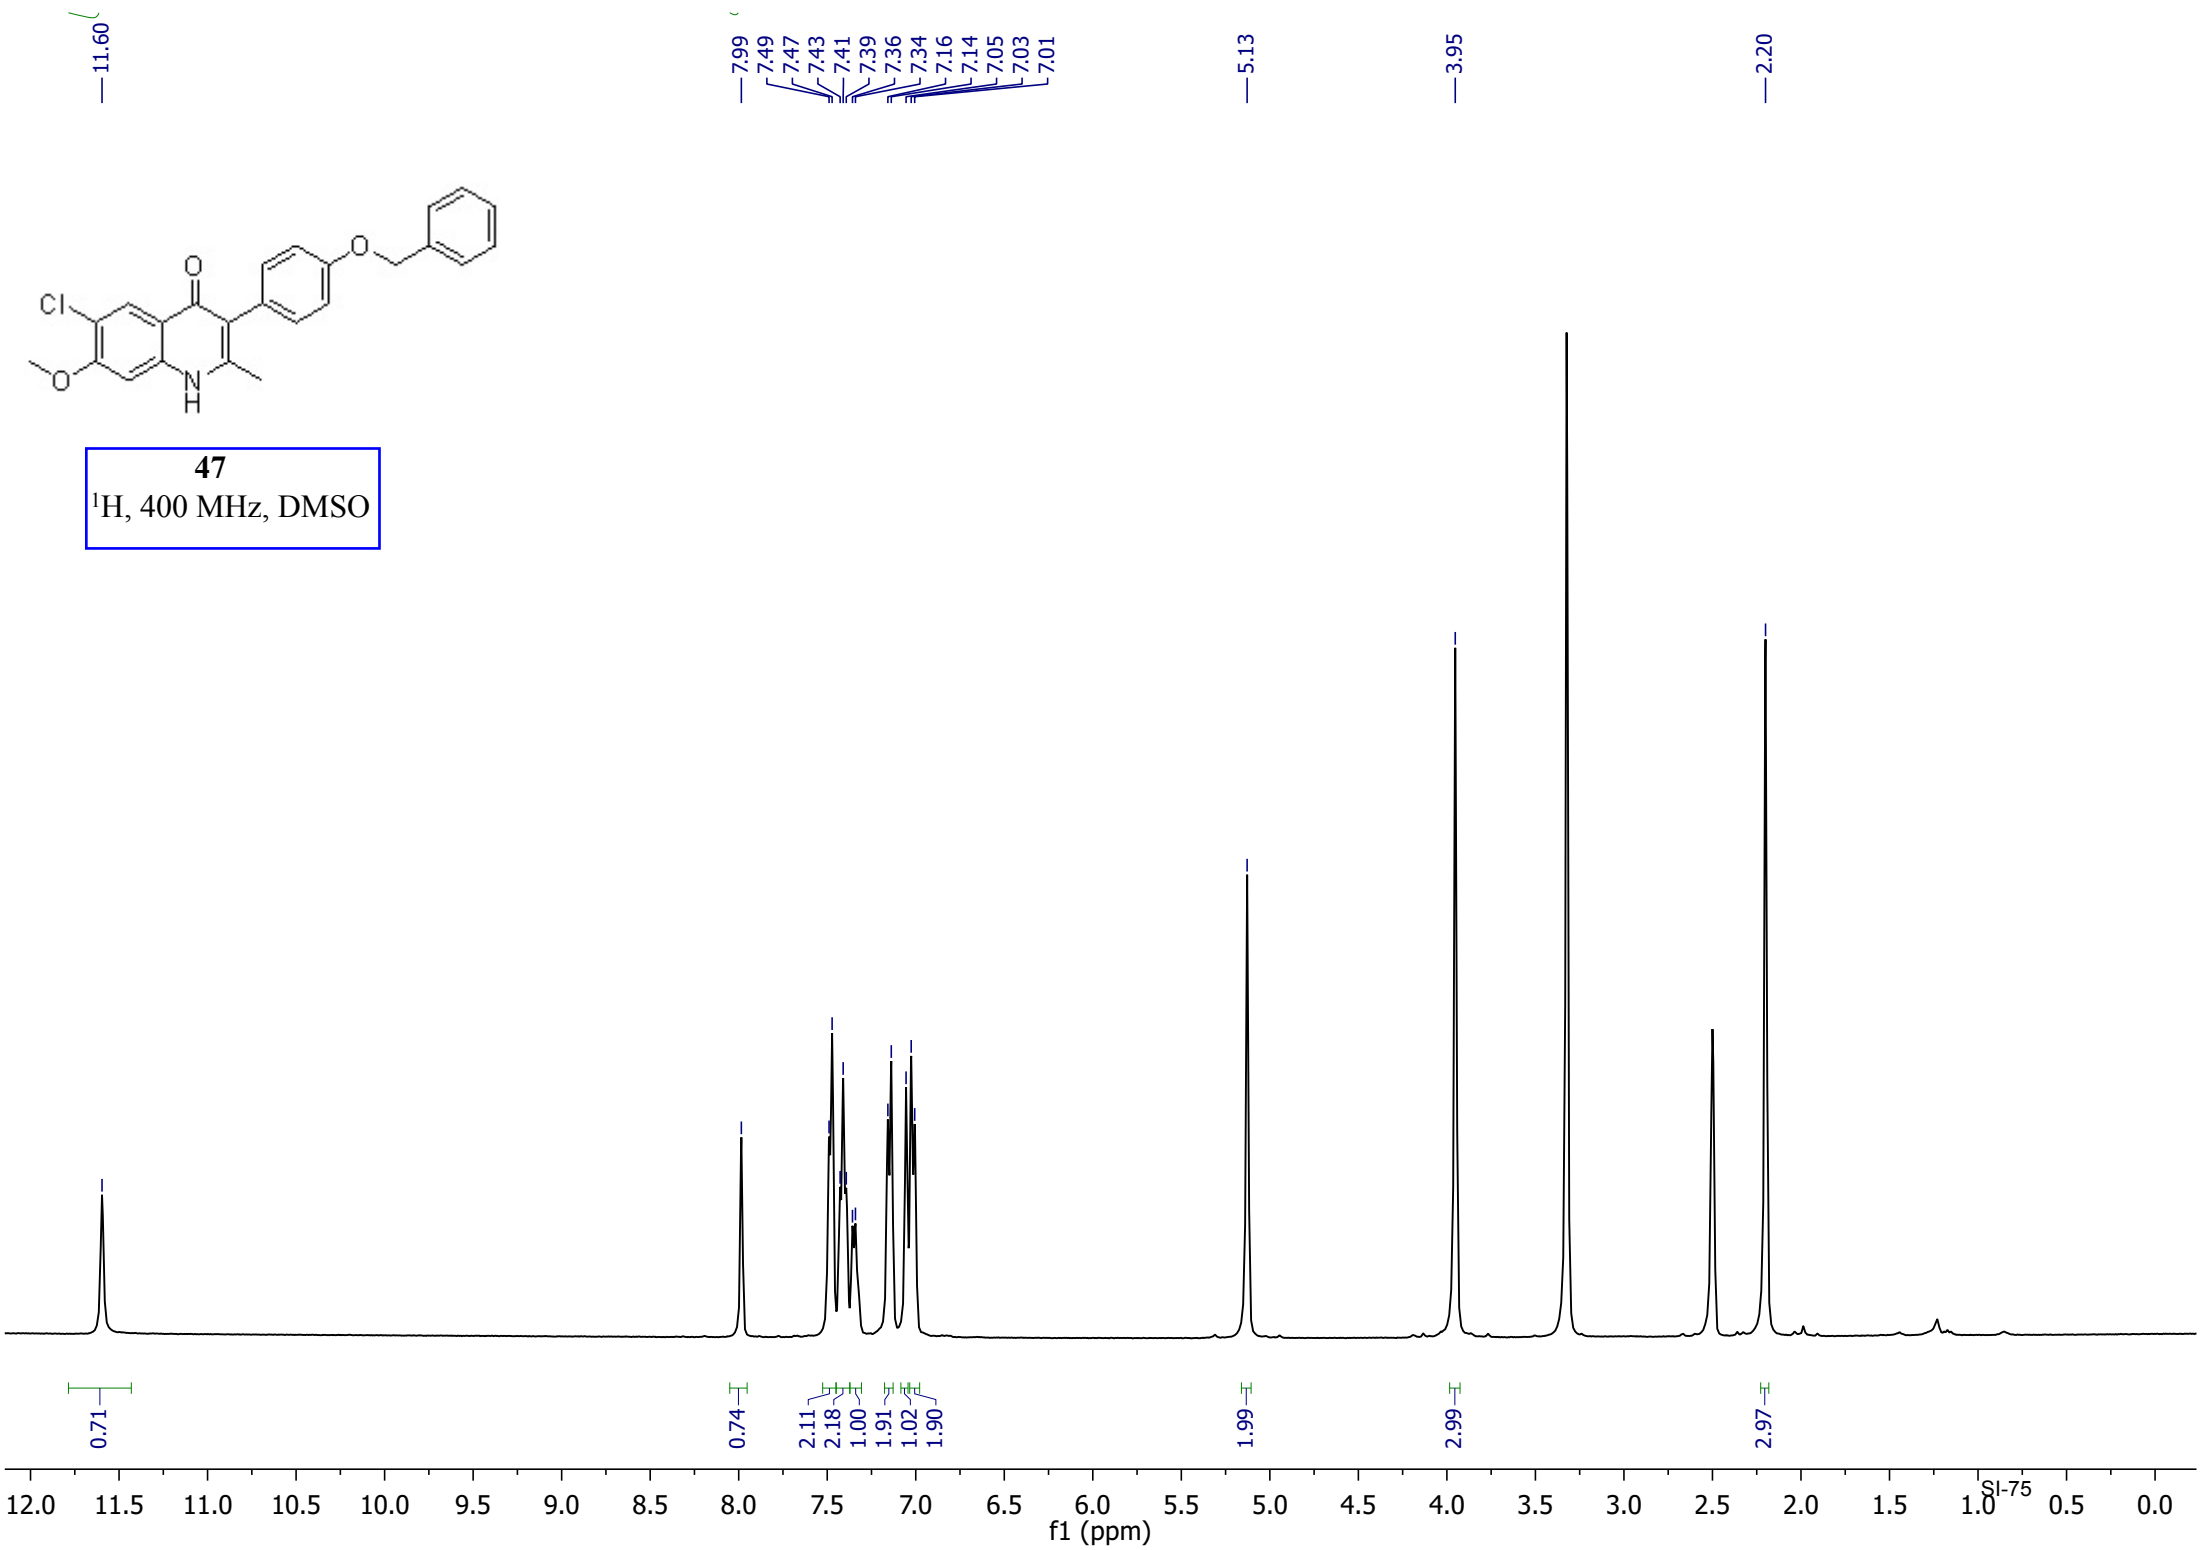

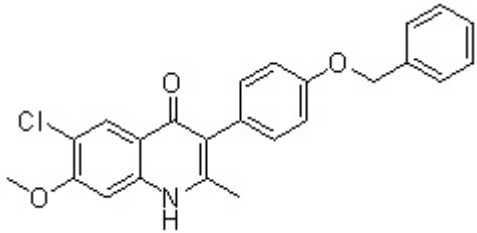

**47**  
<sup>13</sup>C, 101 MHz, DMSO

—173.64  
—157.03  
—156.59  
—146.38  
—139.53  
—137.23  
—131.98  
—128.41  
—128.04  
—127.76  
—127.64  
—126.18  
—120.32  
—118.72  
—117.83  
—114.06

—99.36

—69.15

—56.35

—18.89

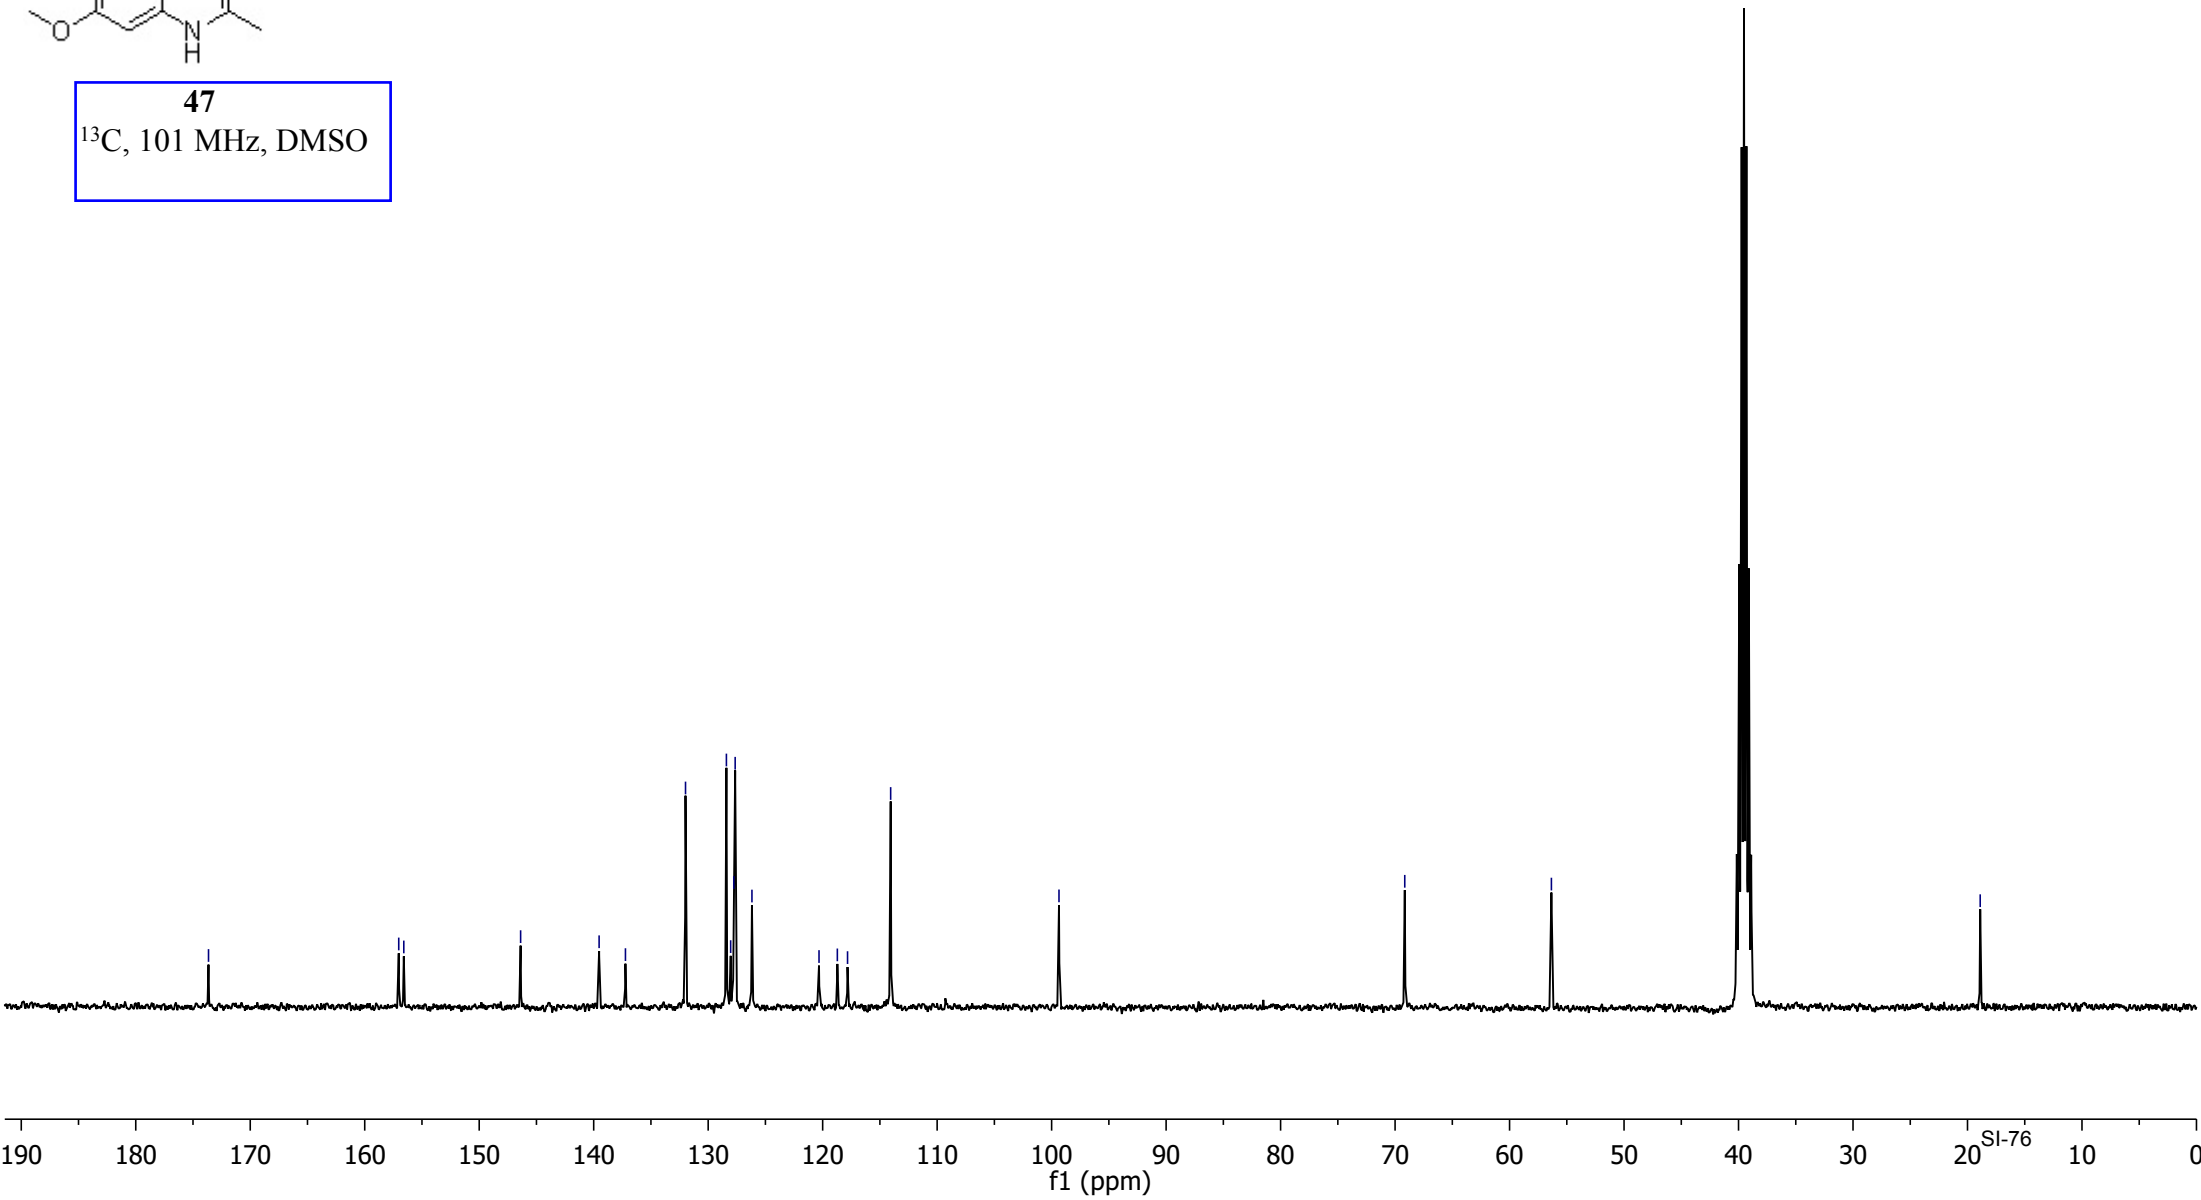

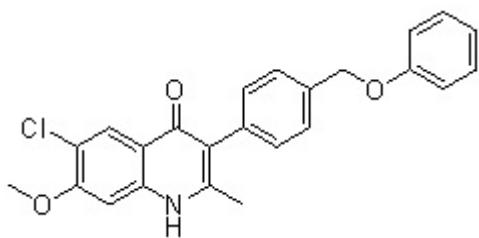

**48**

$^1\text{H}$ , 400 MHz, DMSO

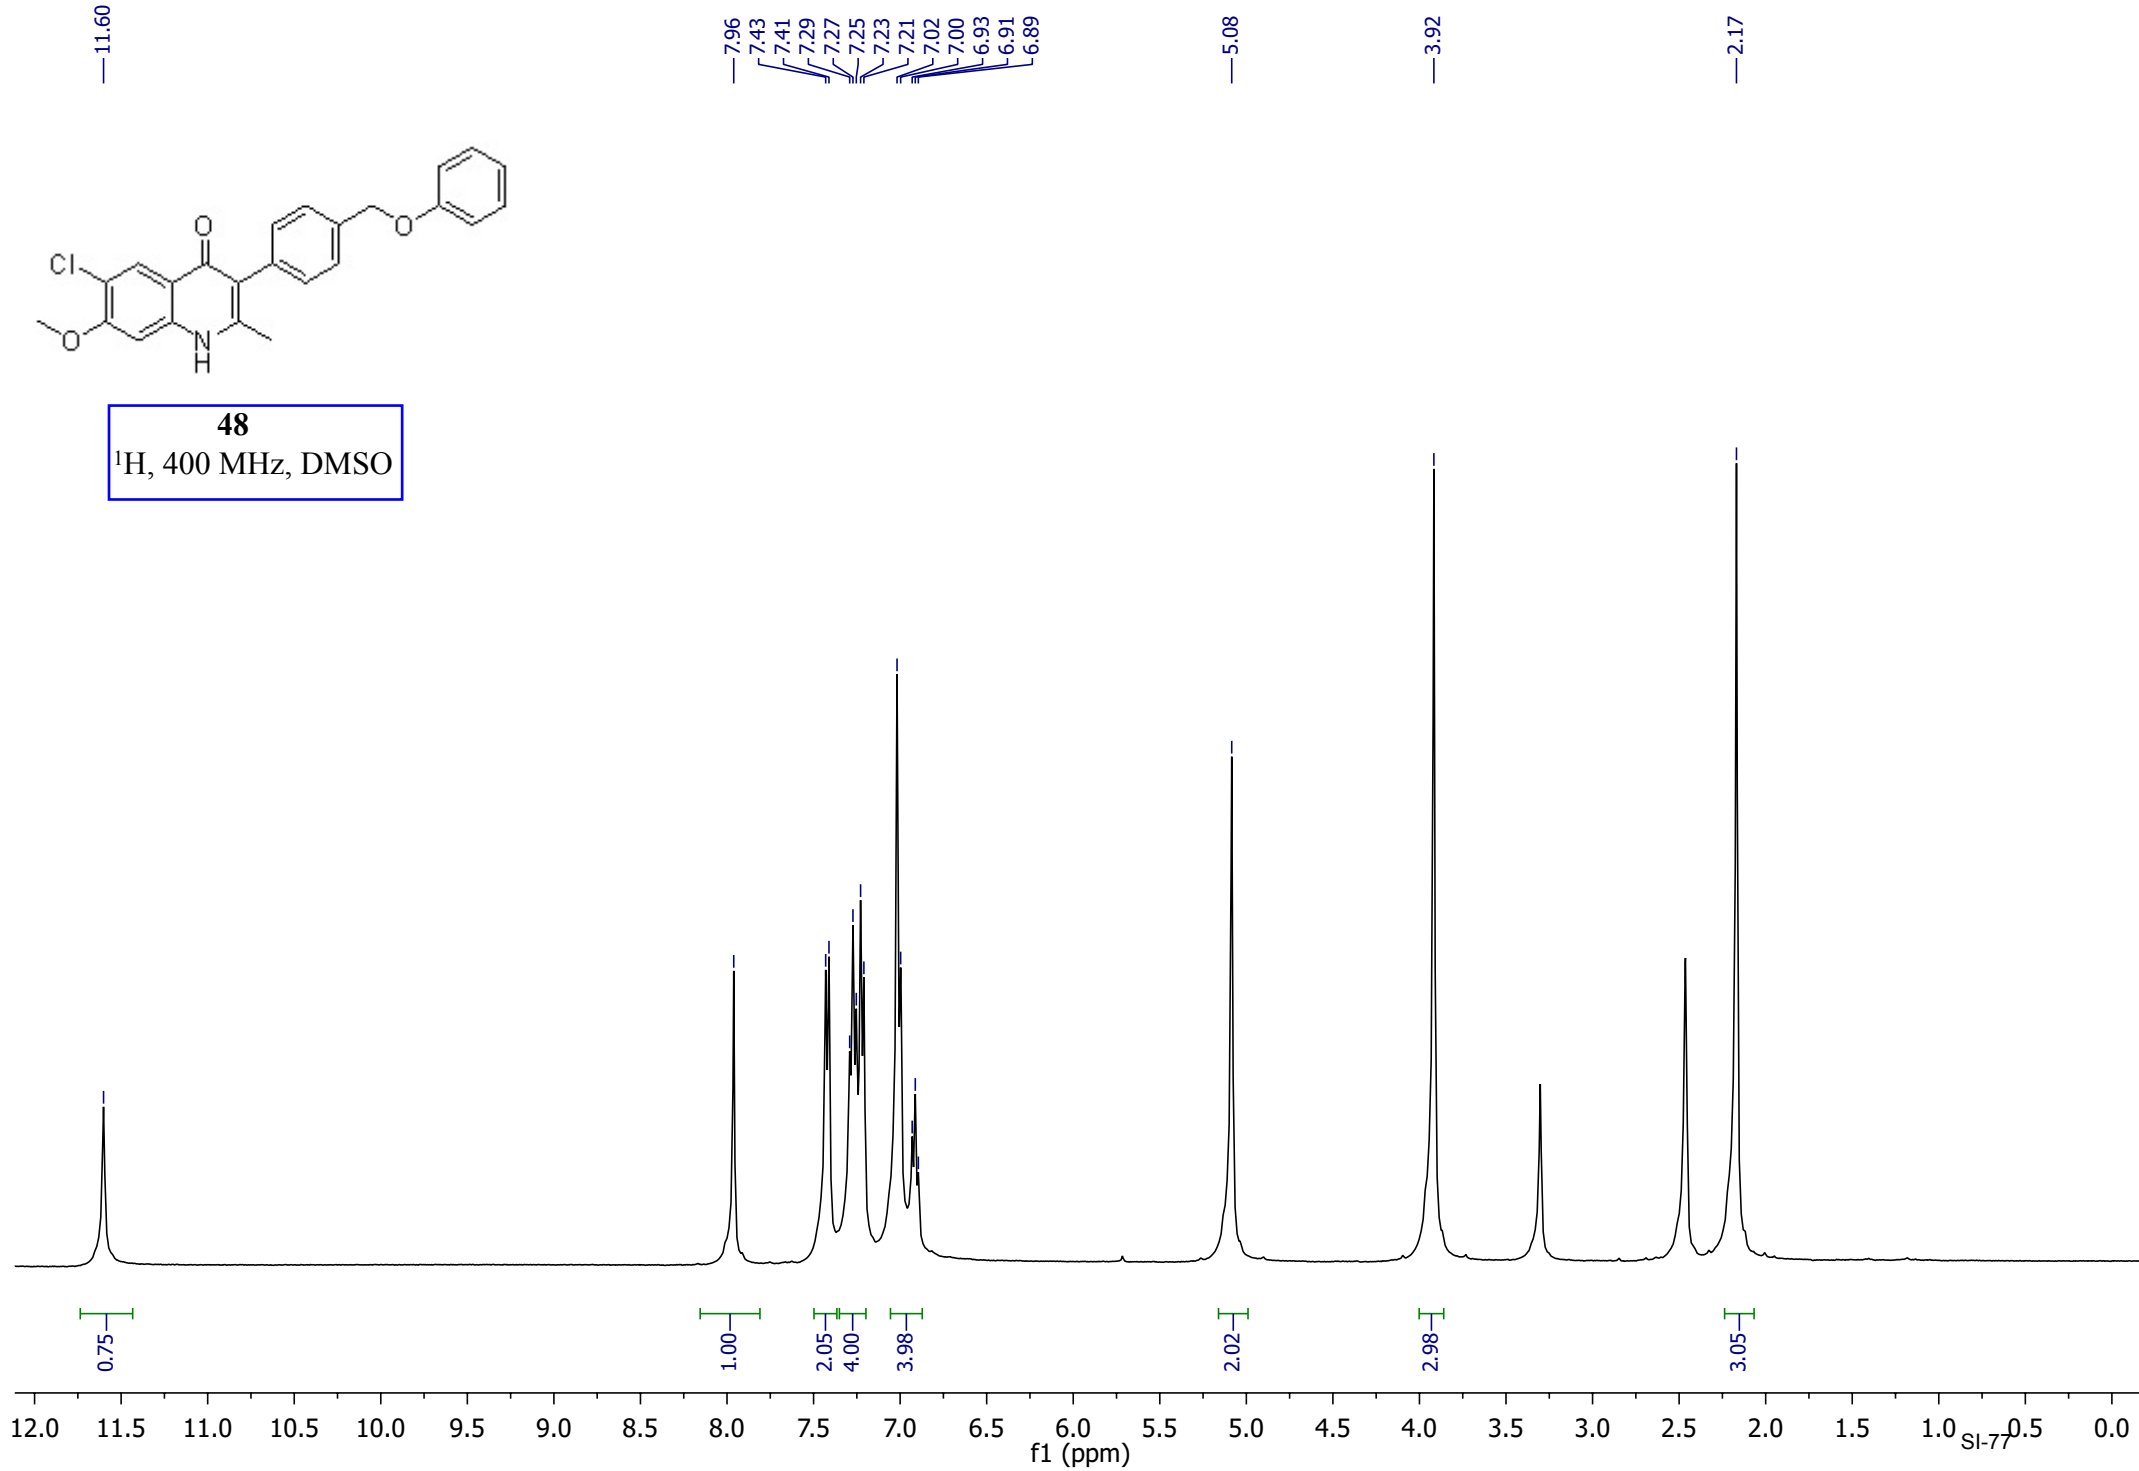



**48**  
<sup>13</sup>C, 101 MHz, DMSO

—174.17

—159.11  
—157.35

—147.15  
—140.25  
—136.07  
—135.95  
—131.67  
—130.16  
—127.90  
—126.85  
—121.34  
—121.09  
—119.43  
—118.65  
—115.39

—100.09

—69.74

—57.04

—19.55

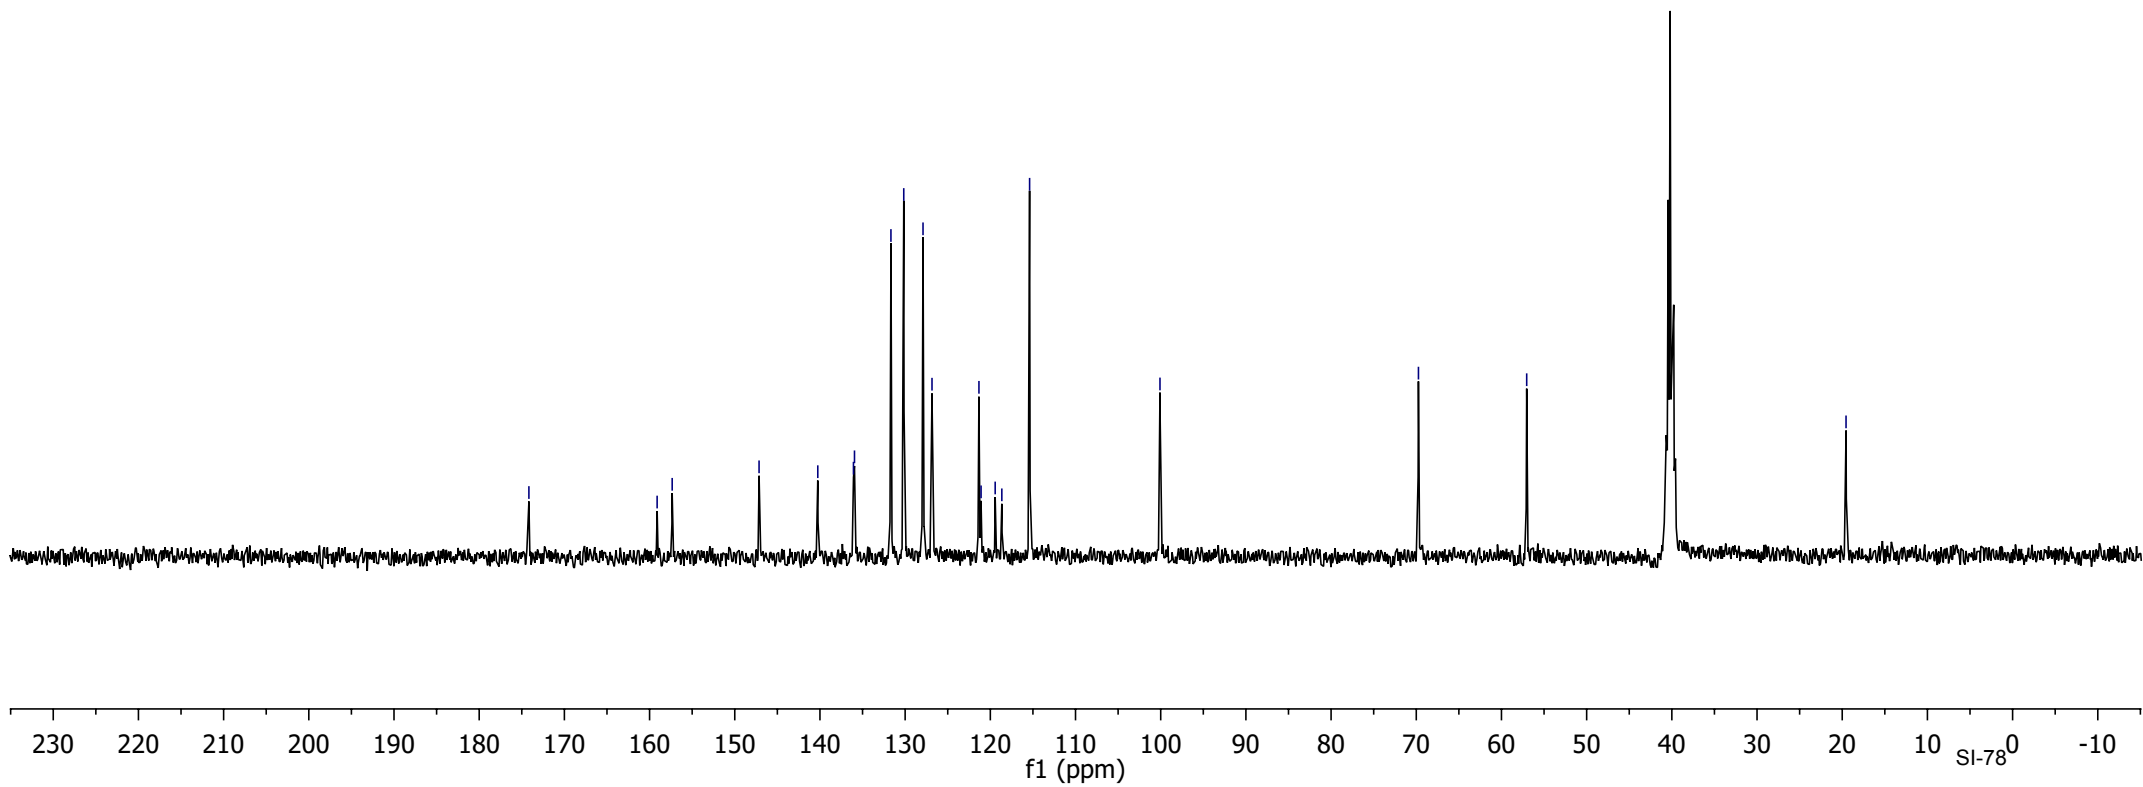

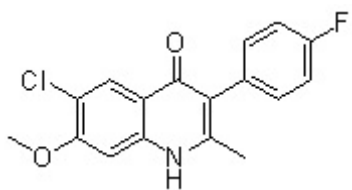

**49**  
<sup>1</sup>H, 400 MHz, DMSO

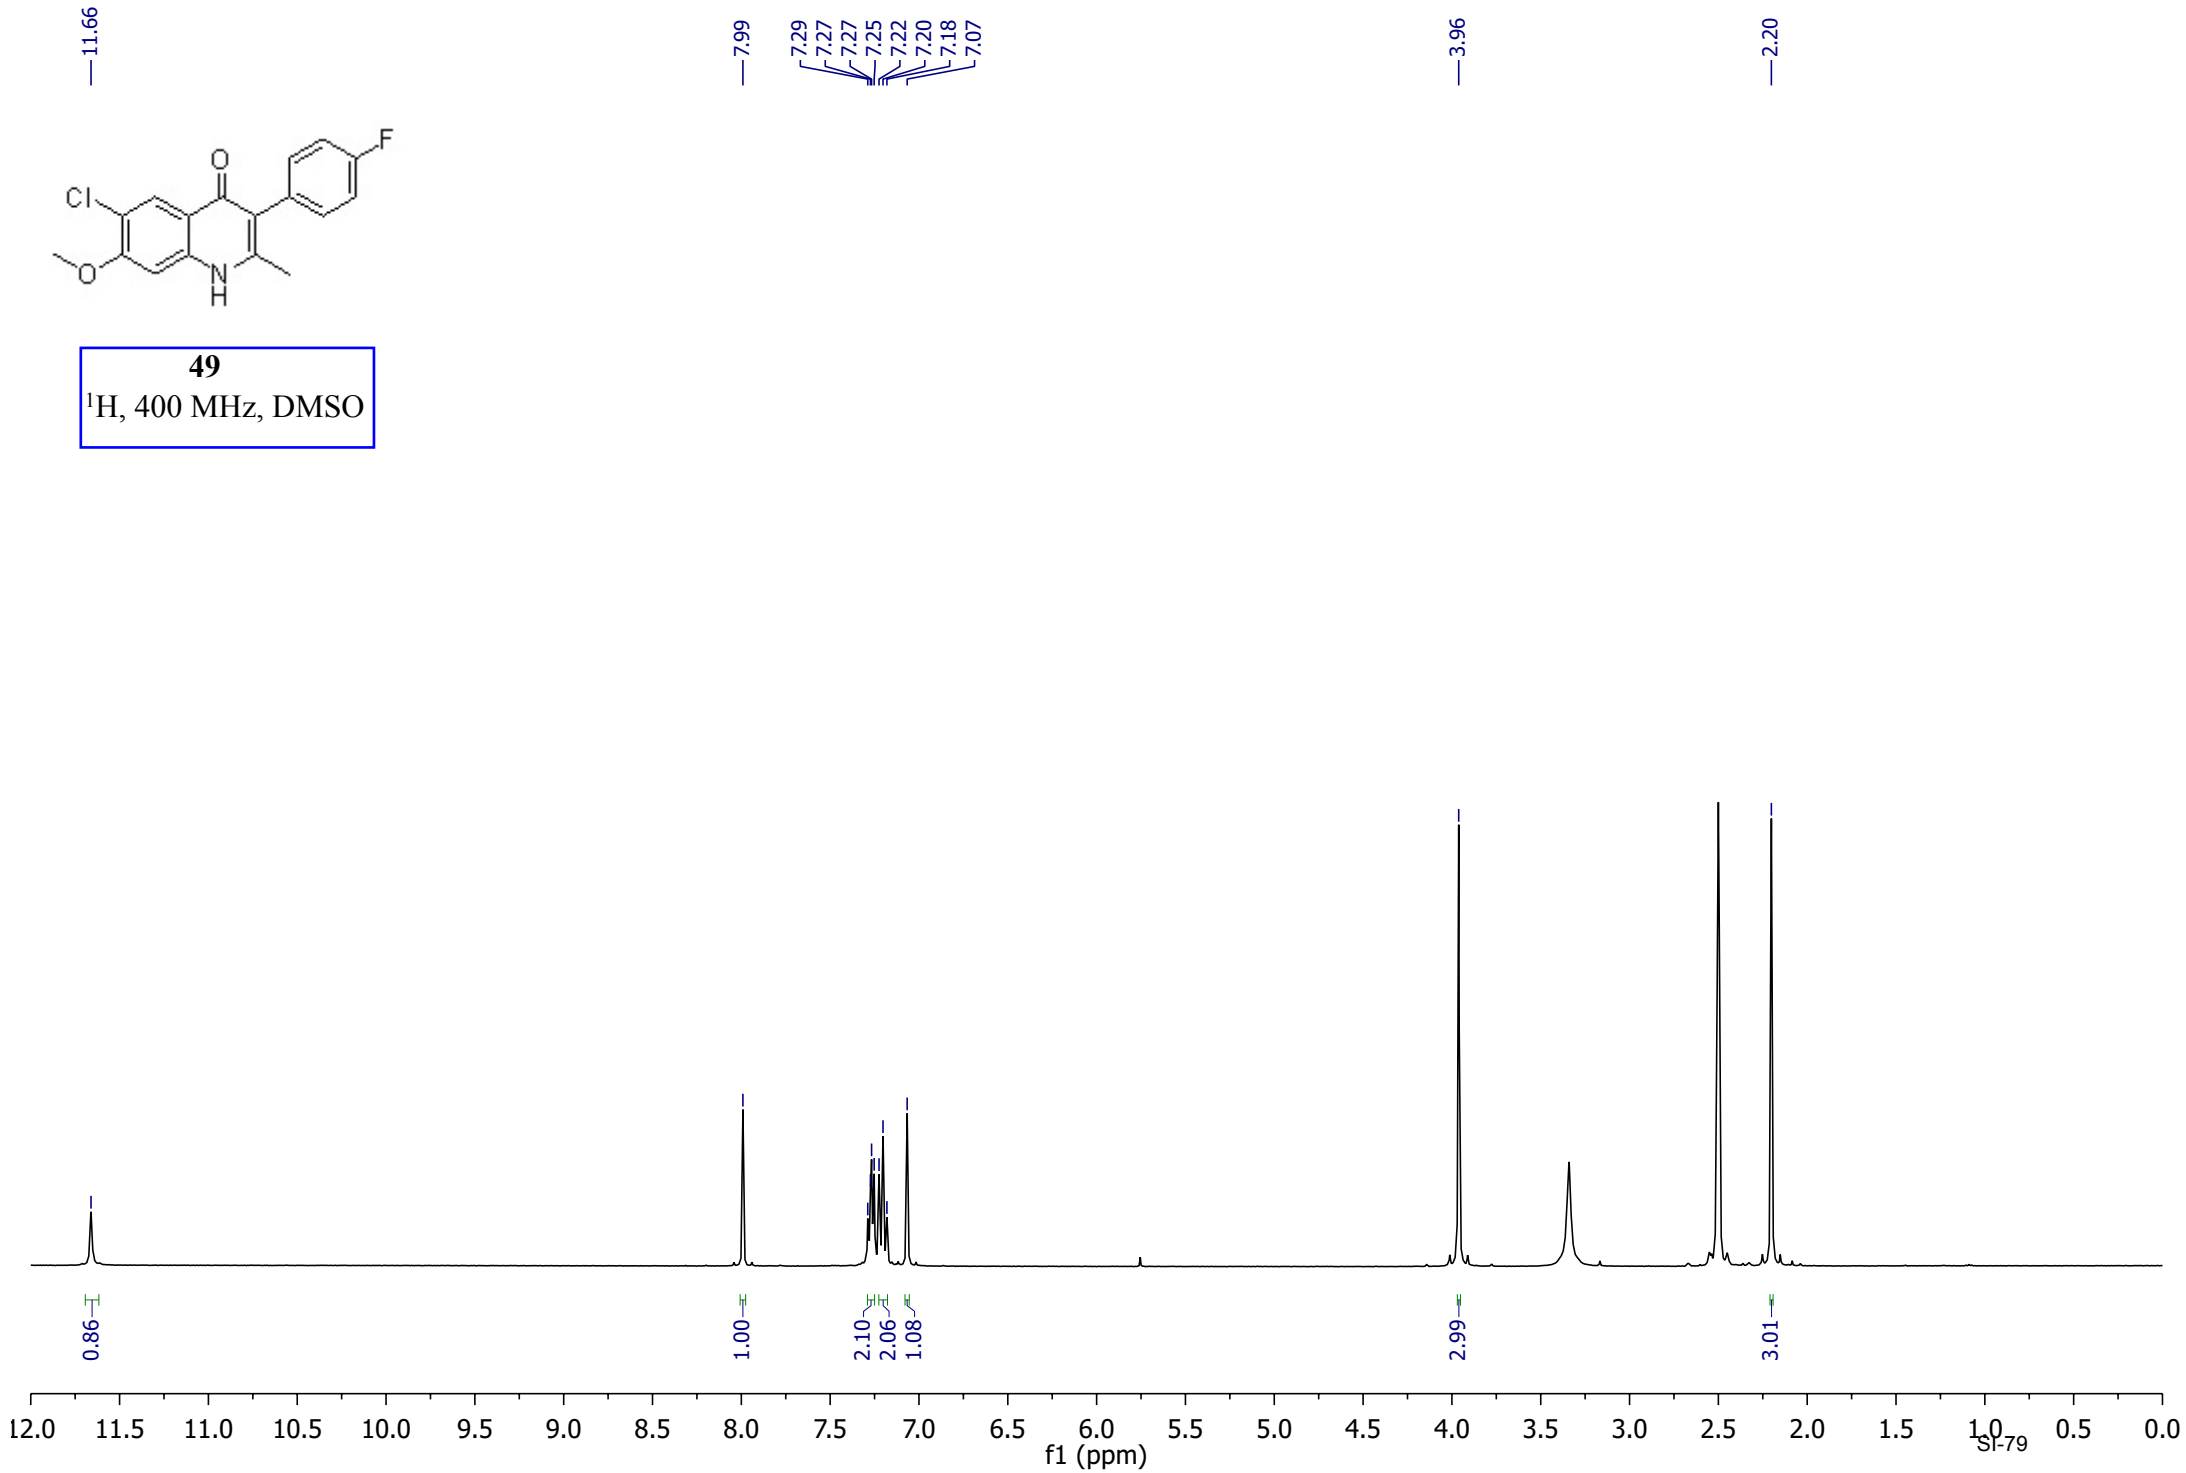



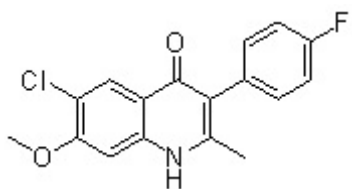

**49**  
 $^{13}\text{C}$ , 101 MHz, DMSO

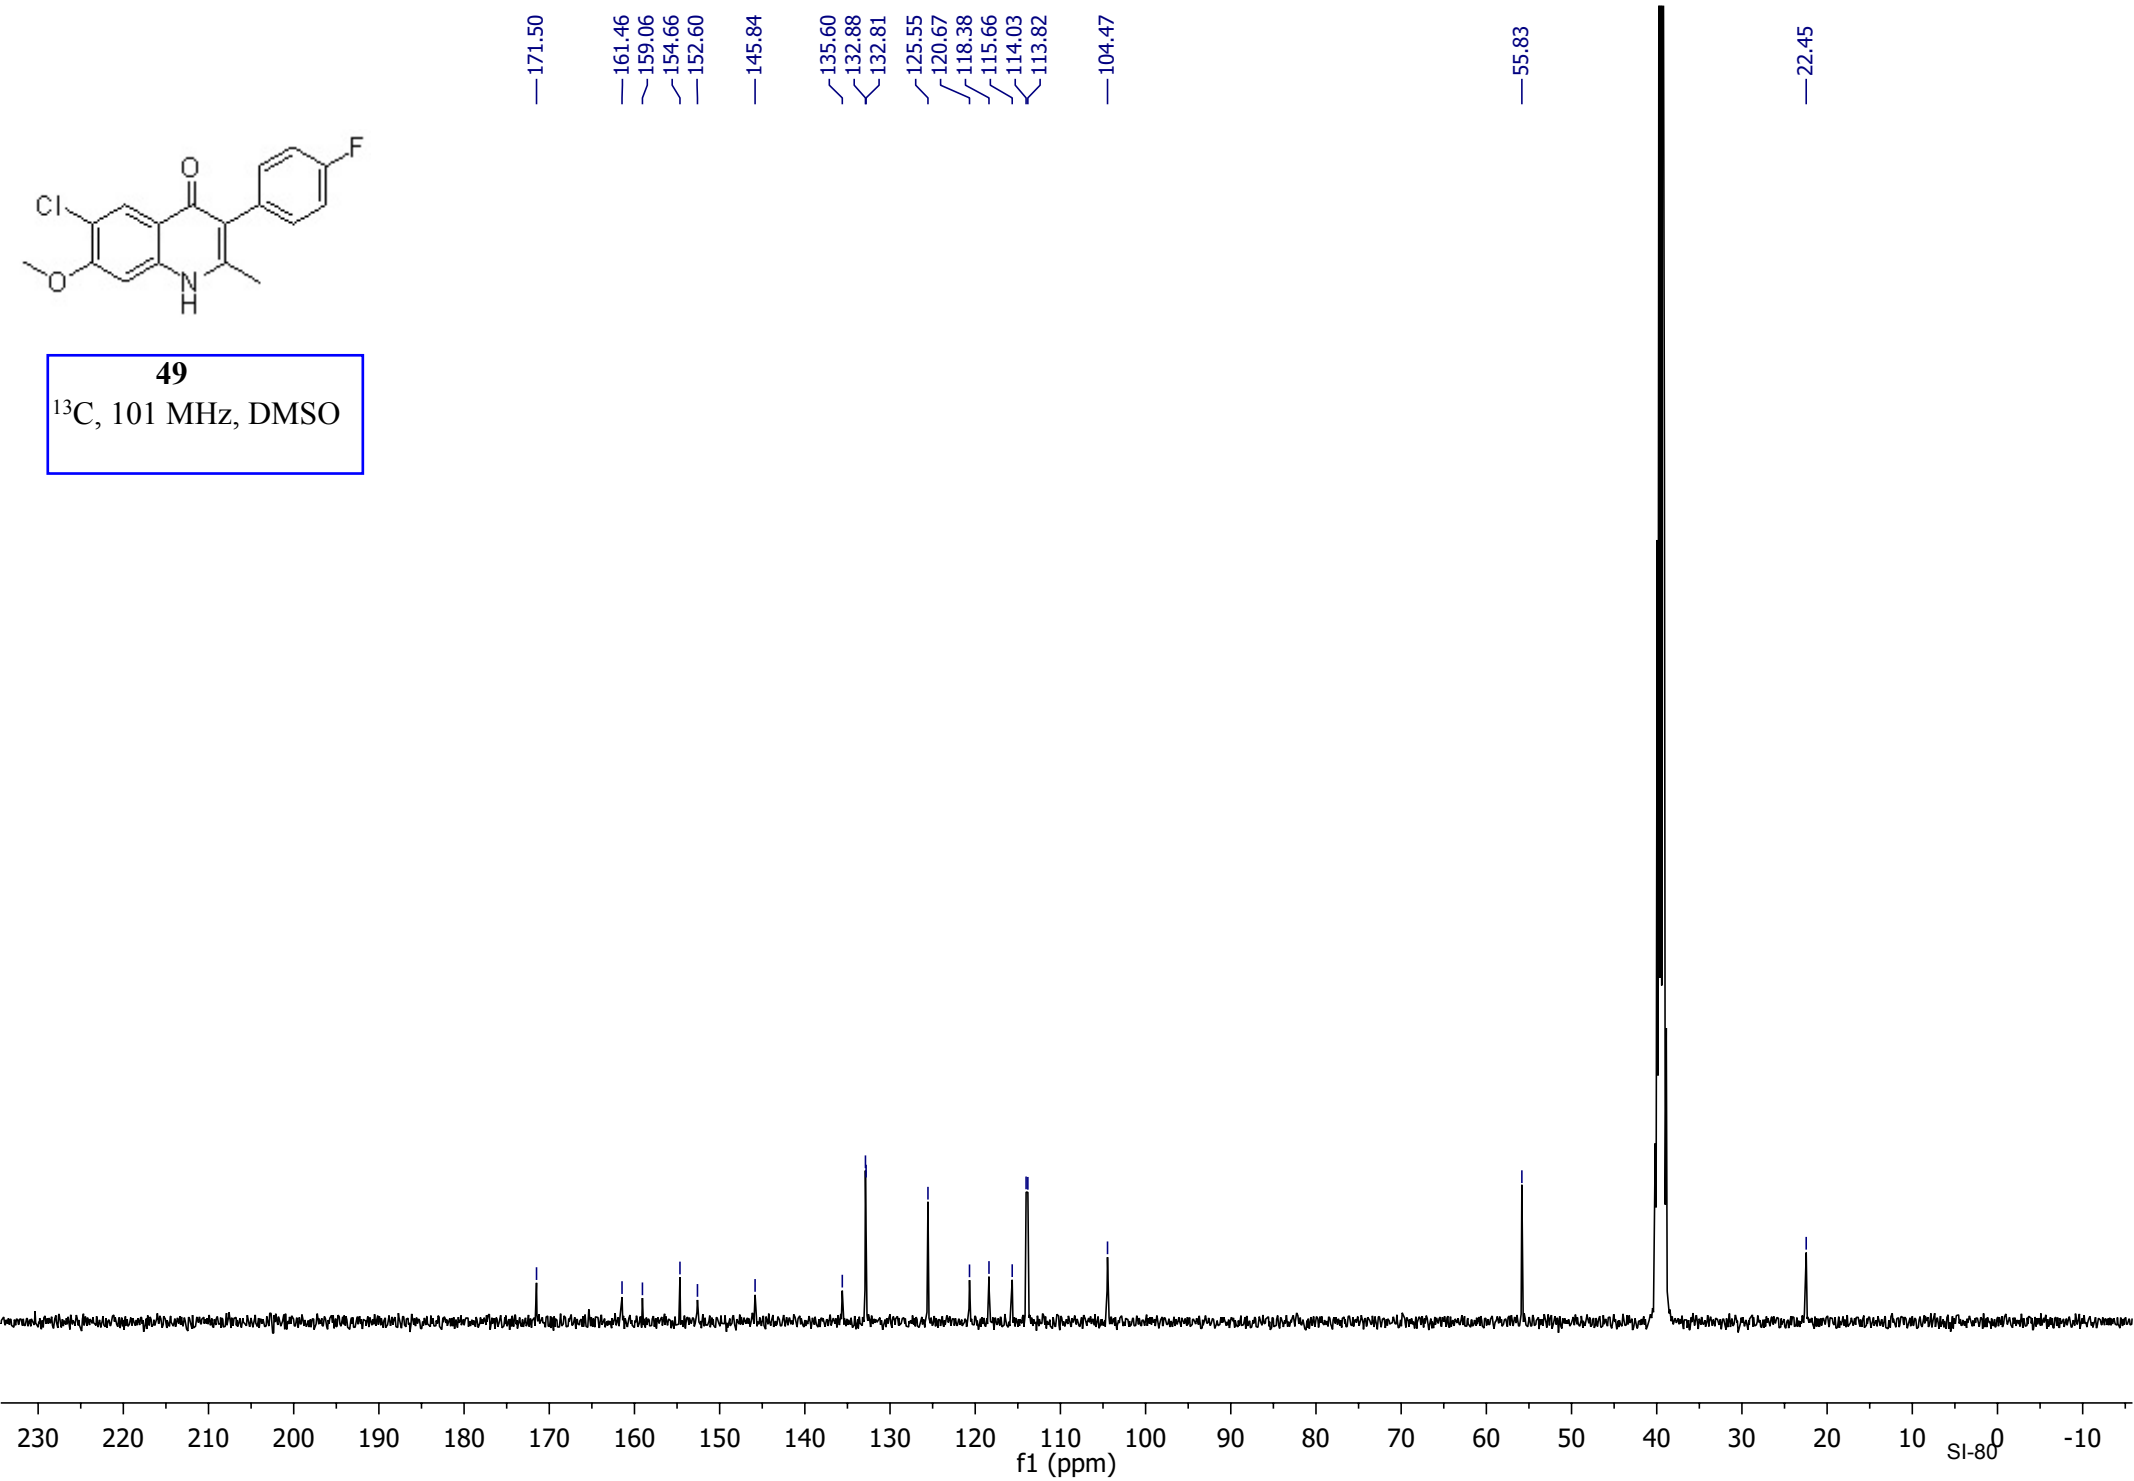



**49**

$^{19}\text{F}$ , 376 MHz, DMSO

— -116.51

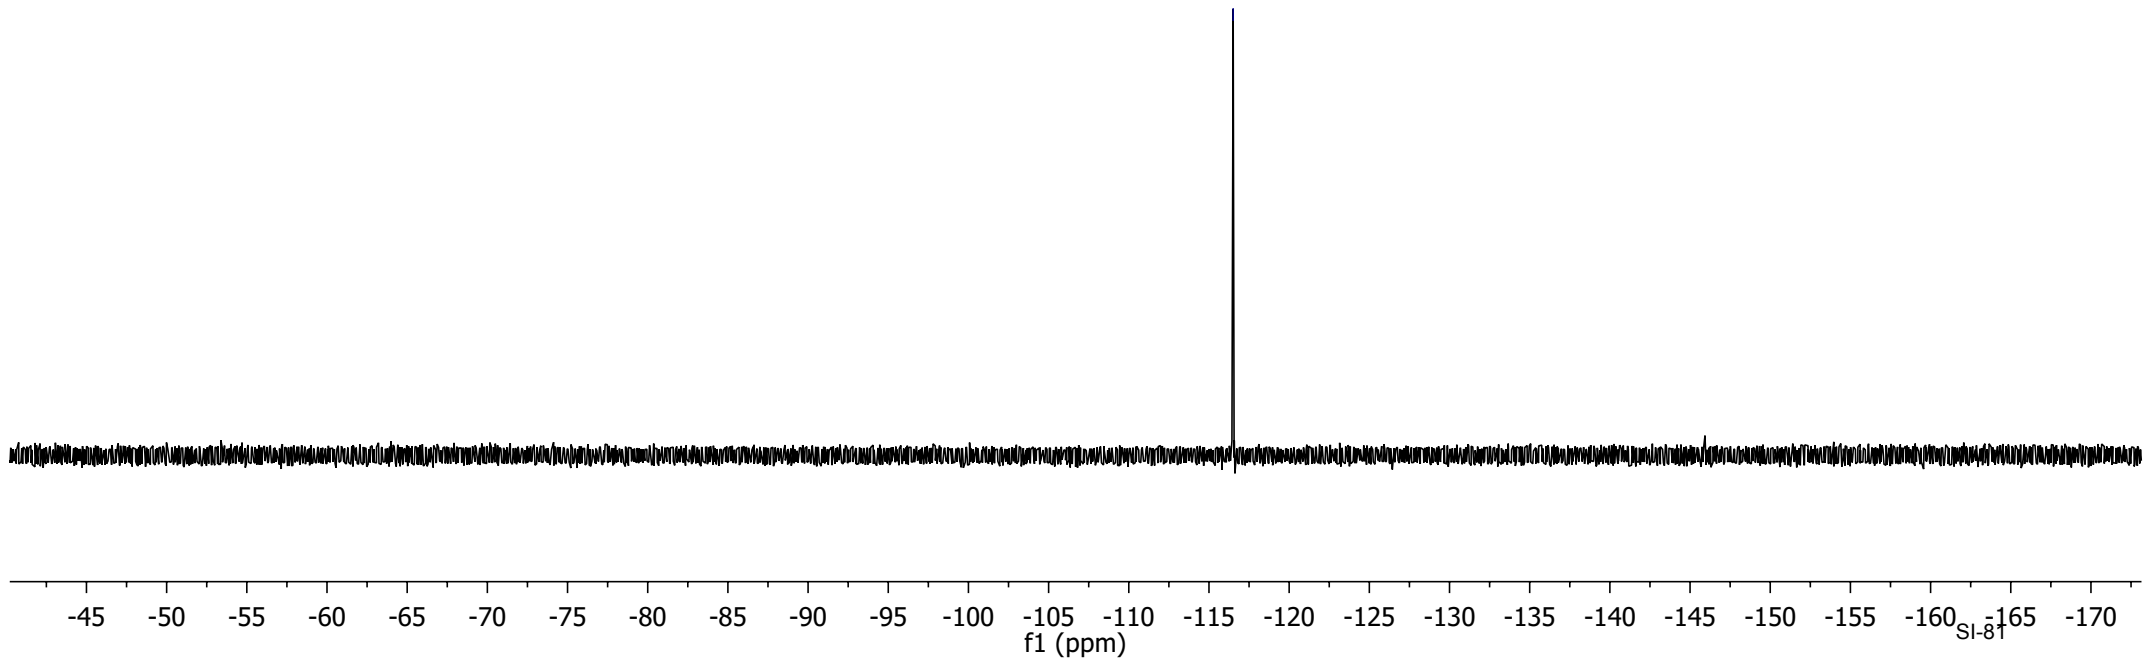

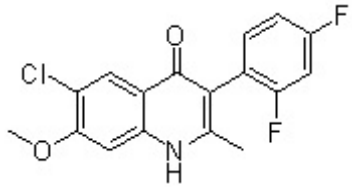

**50**

<sup>1</sup>H, 400 MHz, DMSO

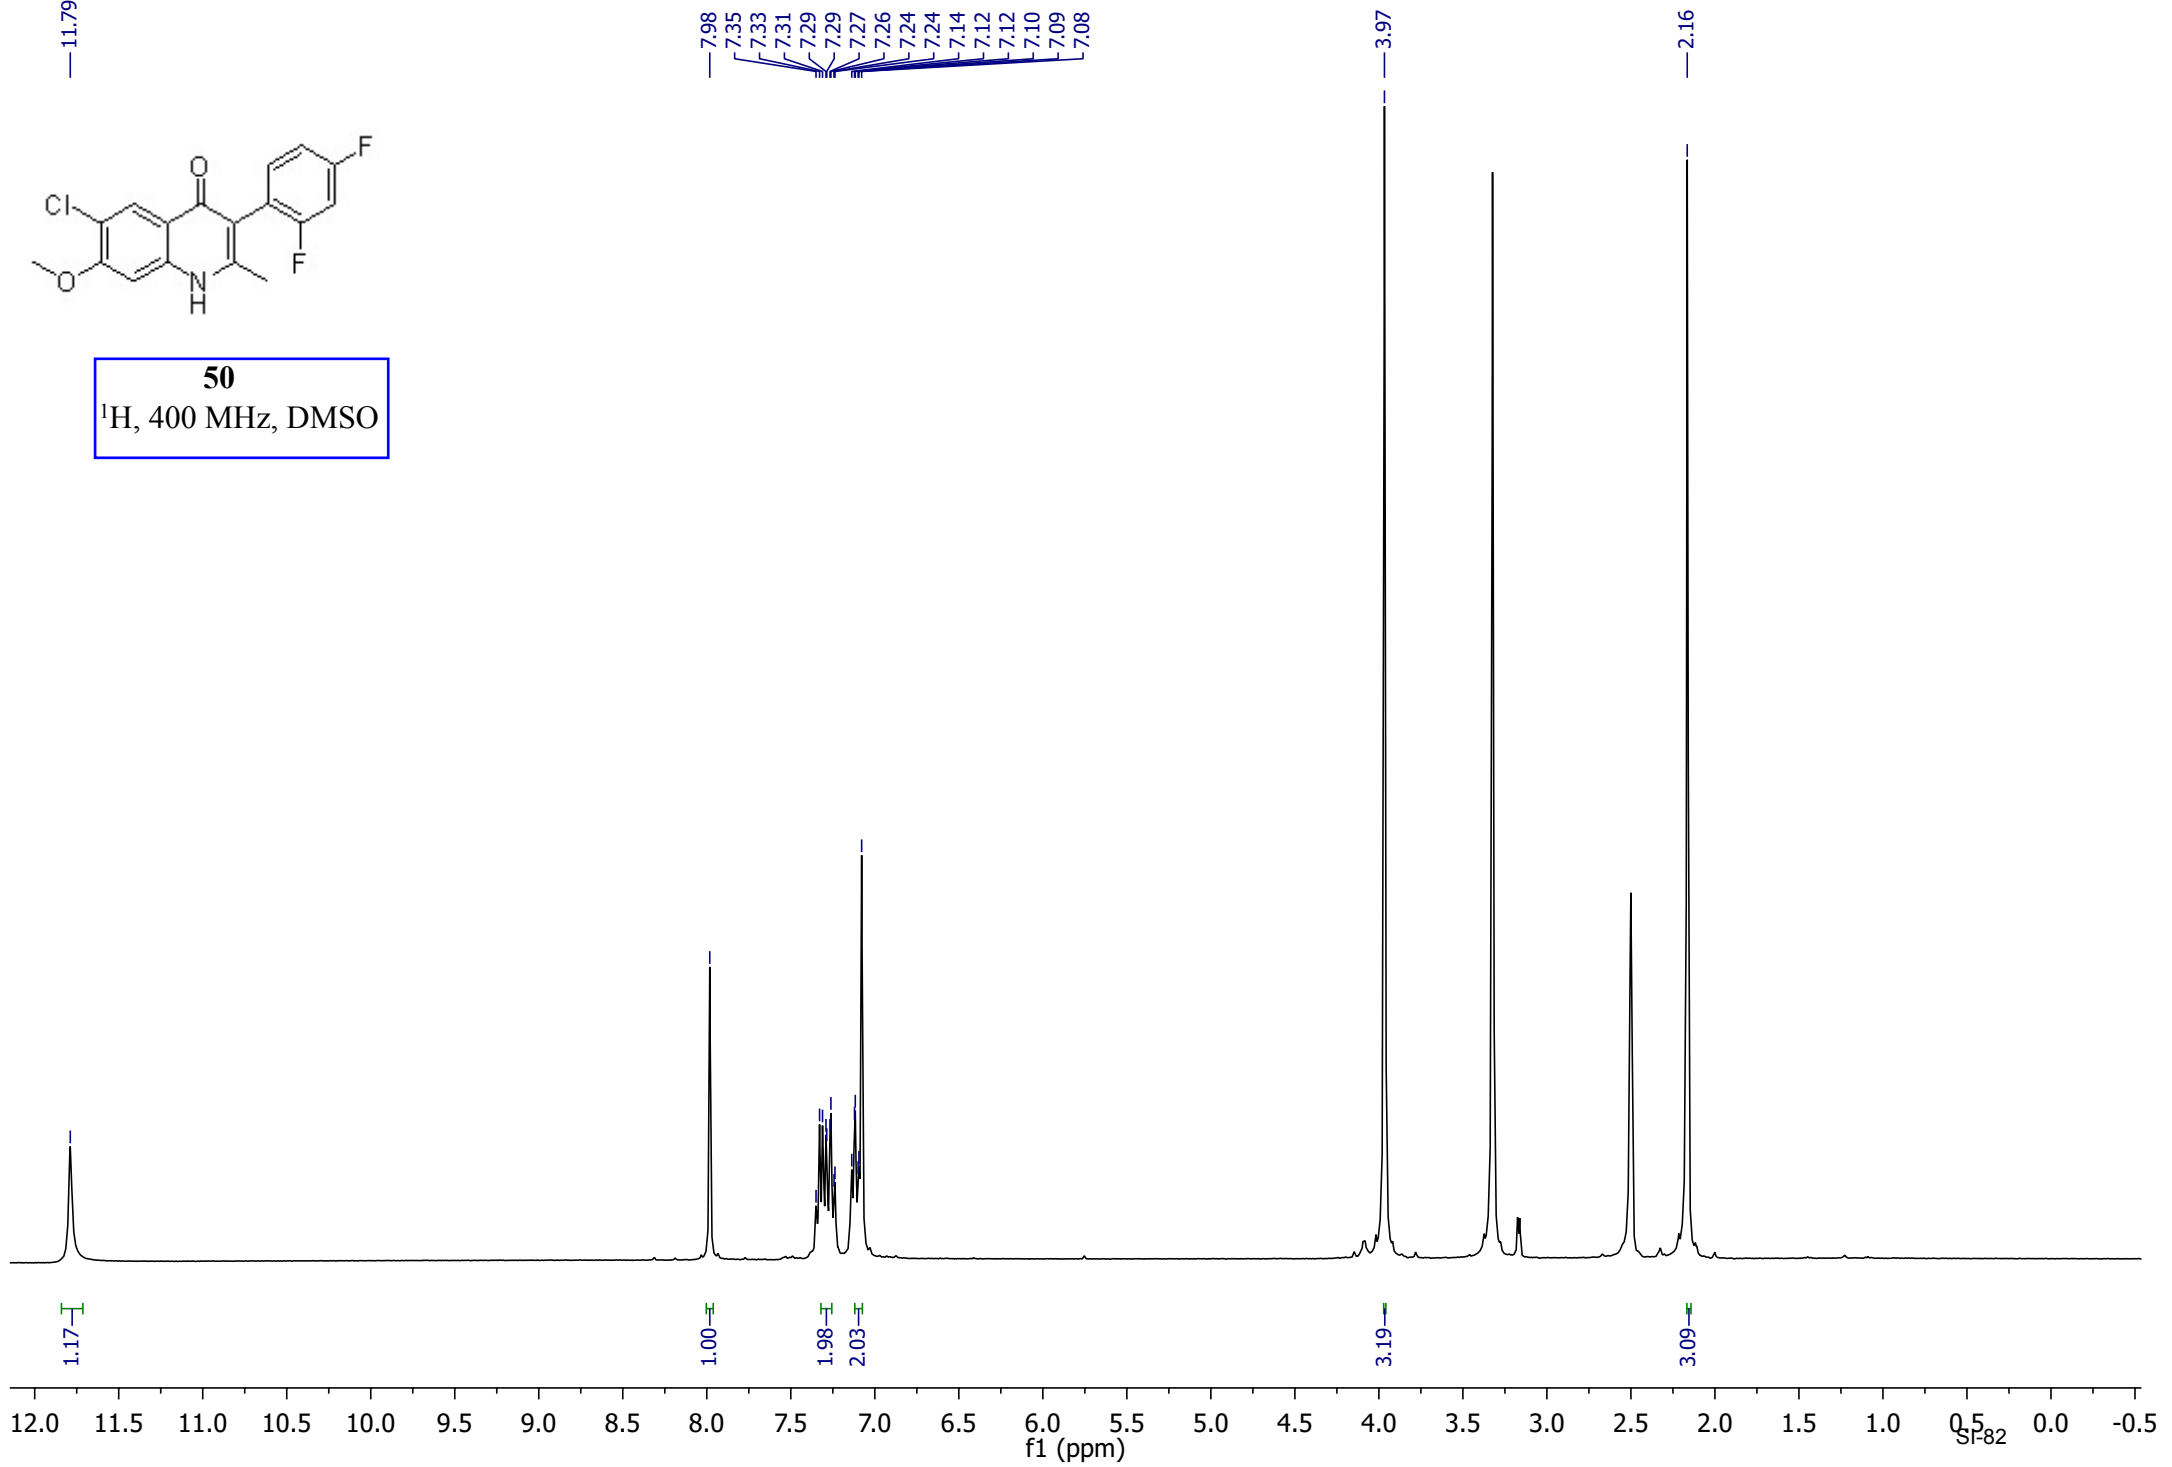

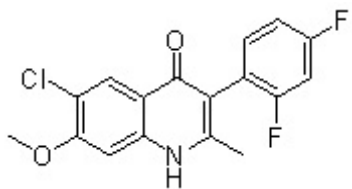

**50**  
<sup>13</sup>C, 101 MHz, DMSO

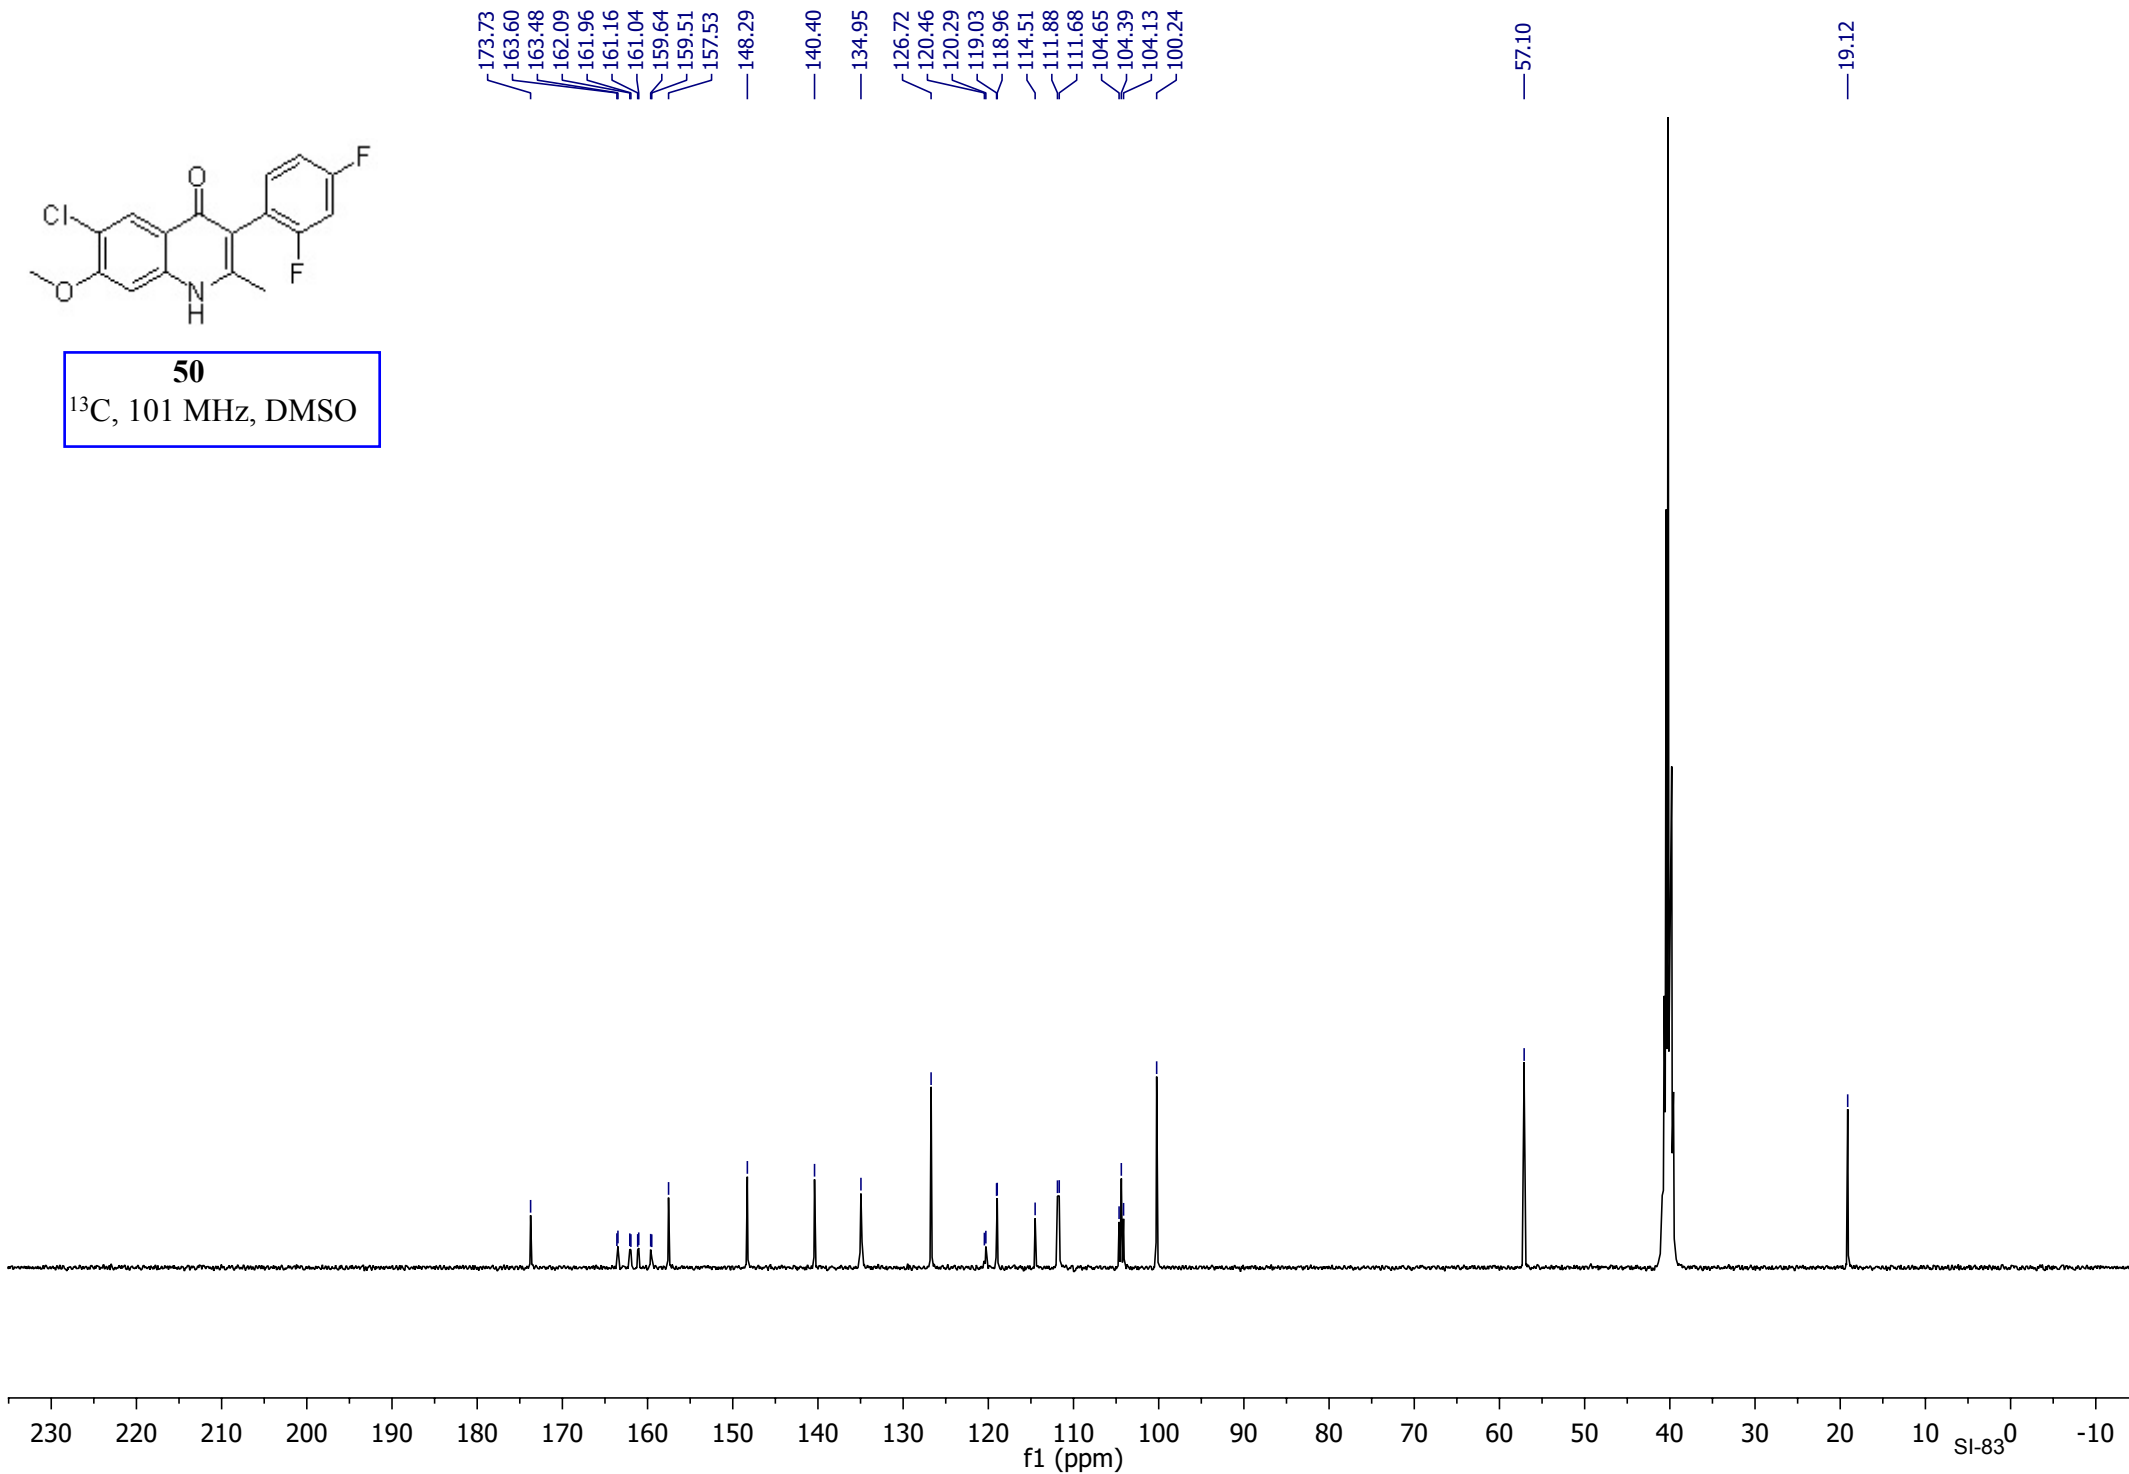



**50**

<sup>19</sup>F, 376 MHz, DMSO

— -108.96  
— -111.77

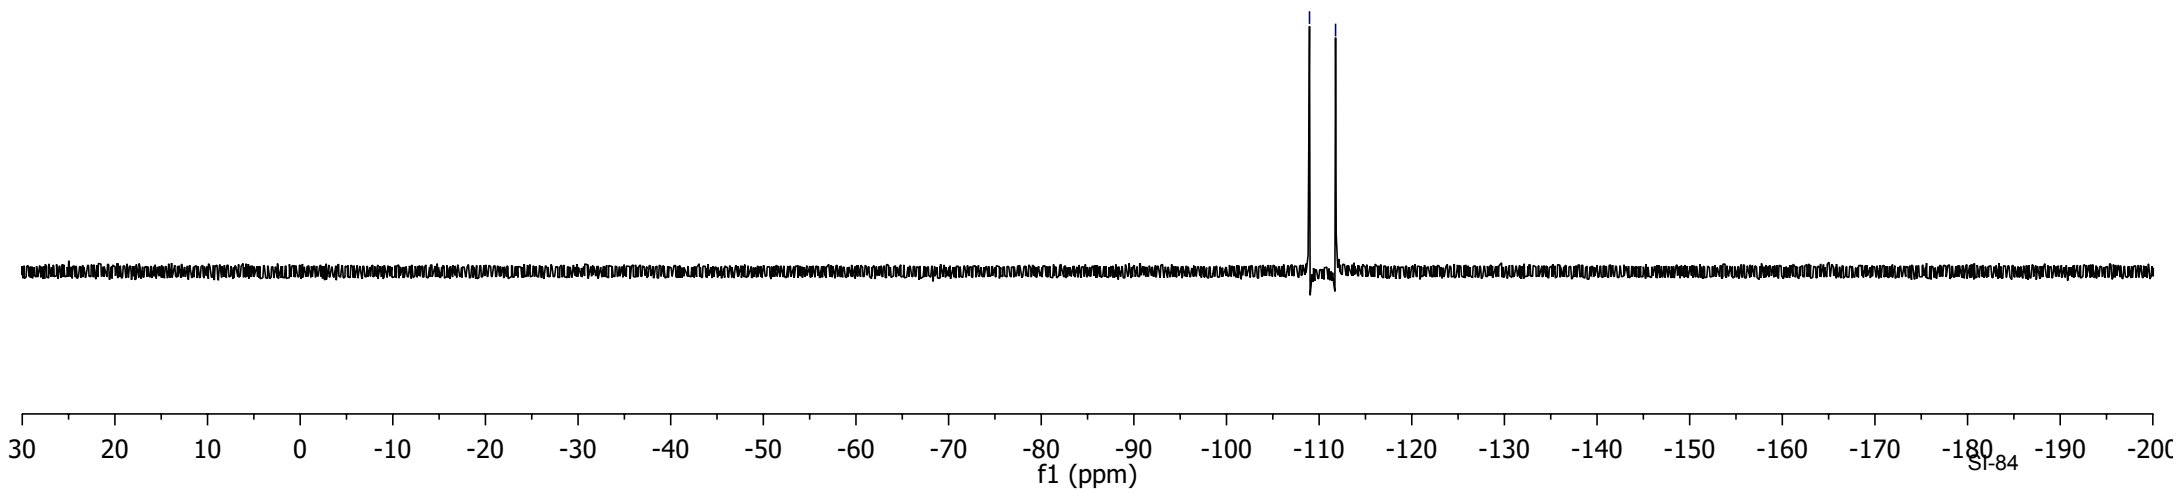

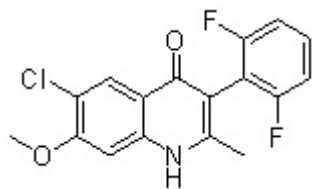

**51**  
<sup>1</sup>H, 400 MHz, DMSO

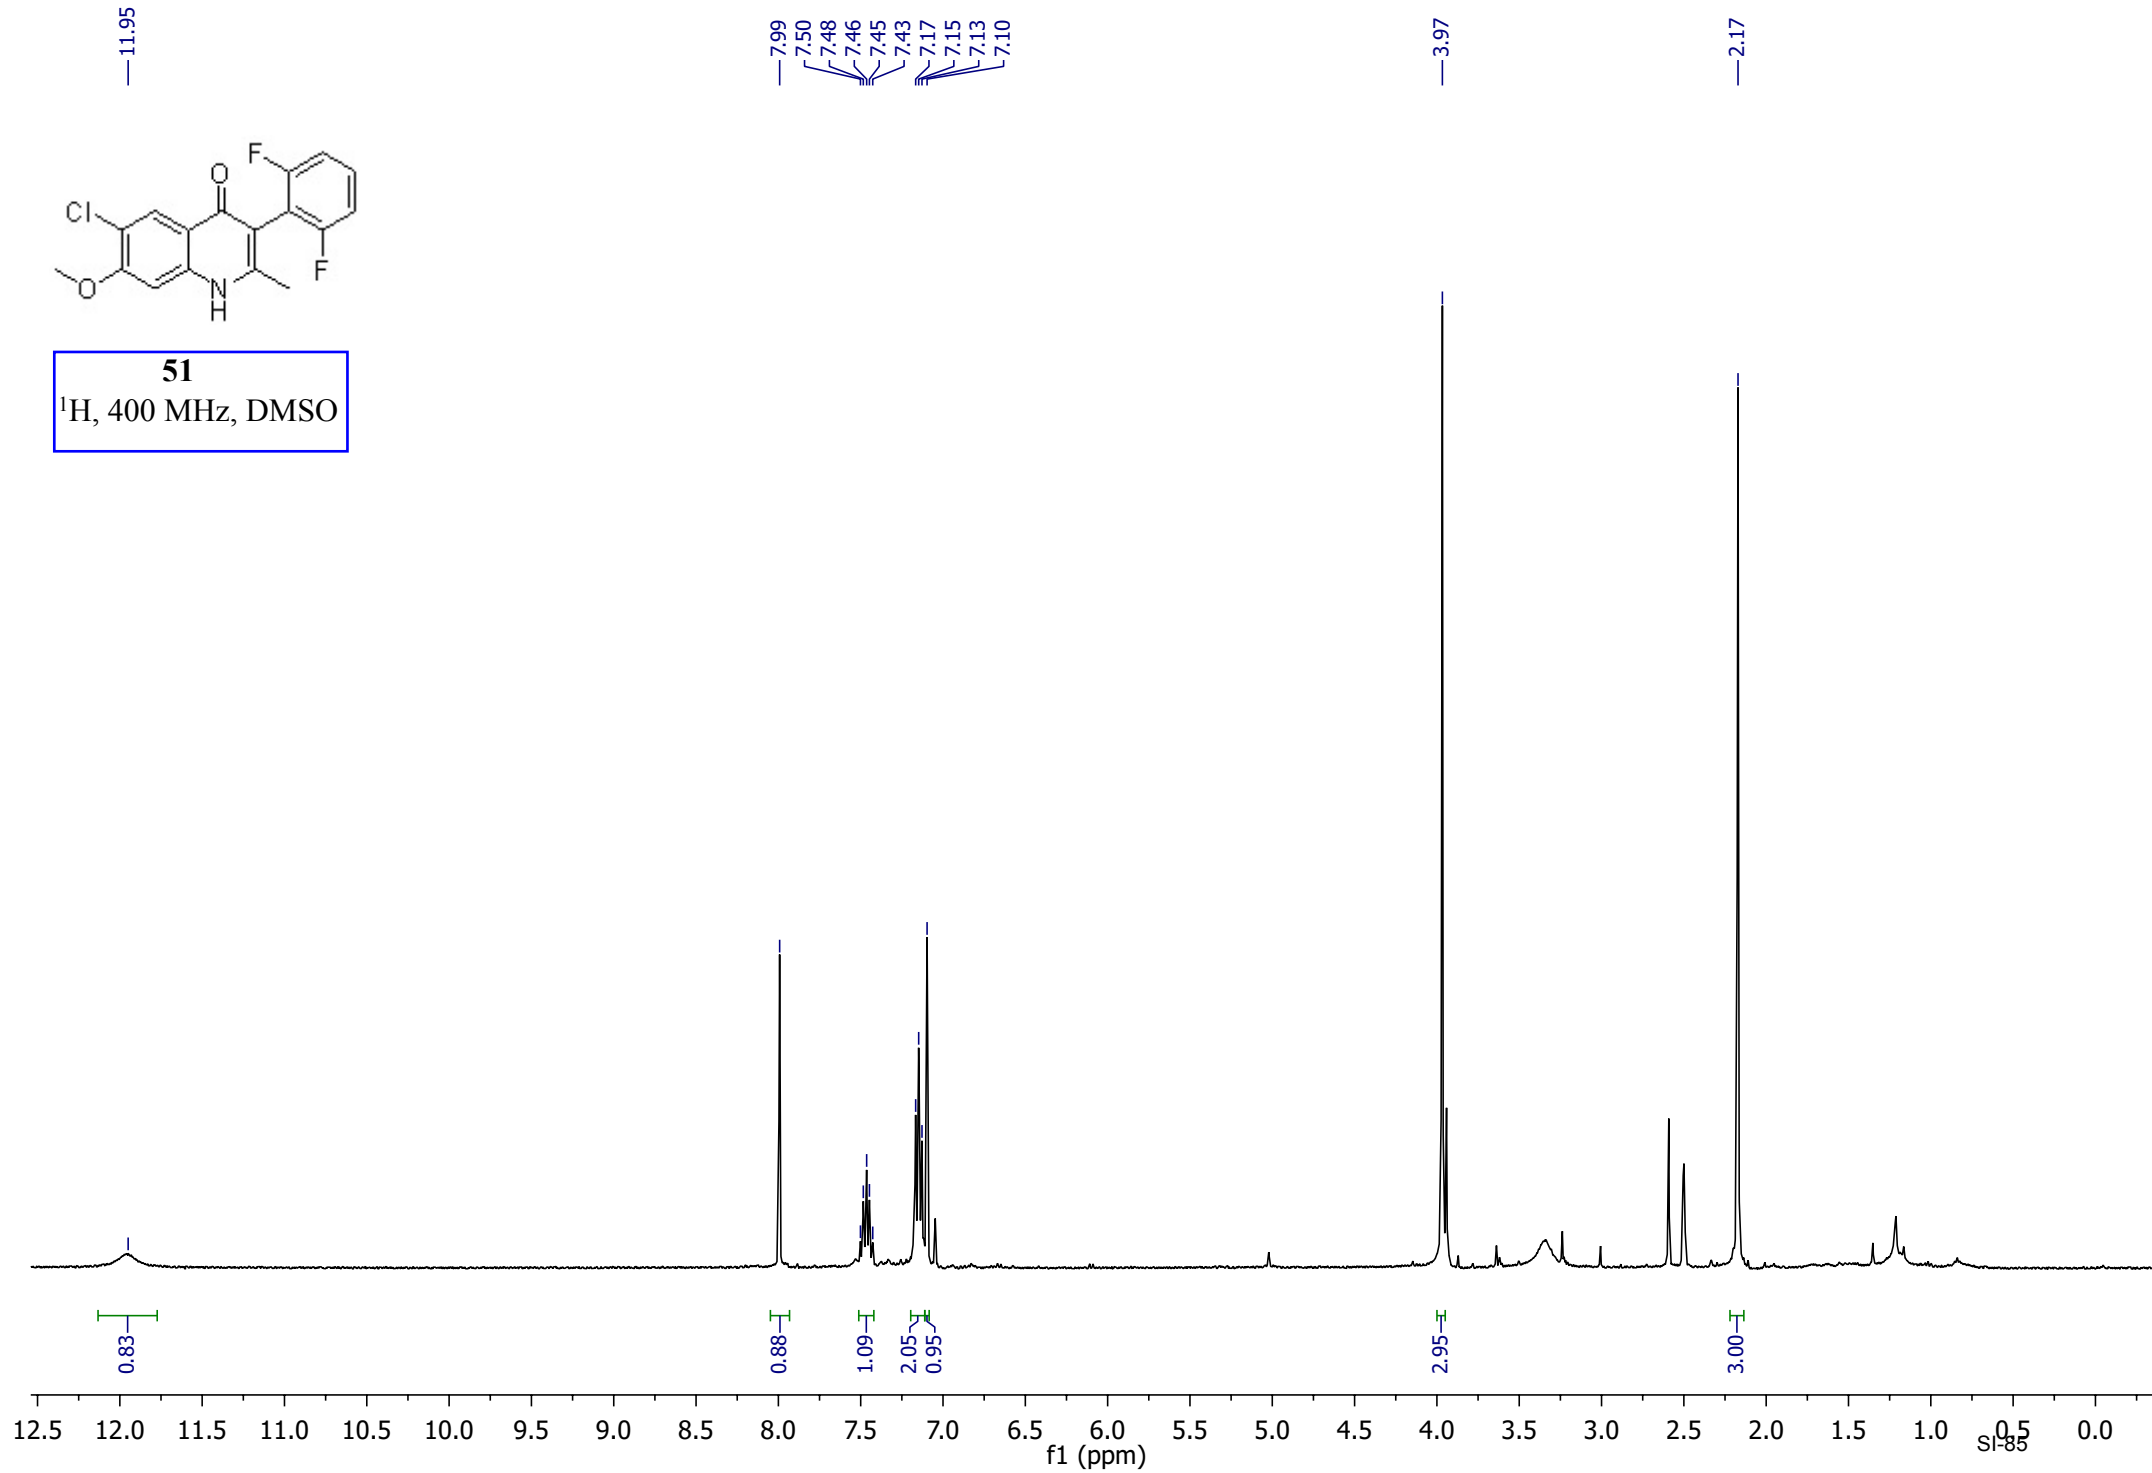

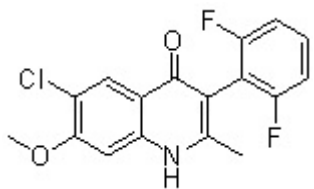

**51**

$^{13}\text{C}$ , 101 MHz, DMSO

—172.67  
161.81  
161.73  
159.37  
159.30  
156.98  
—148.32  
—139.83  
130.07  
129.97  
129.87  
126.20  
125.99  
118.51  
118.12  
112.47  
111.53  
111.27  
108.41  
—99.70  
—56.44  
—18.25

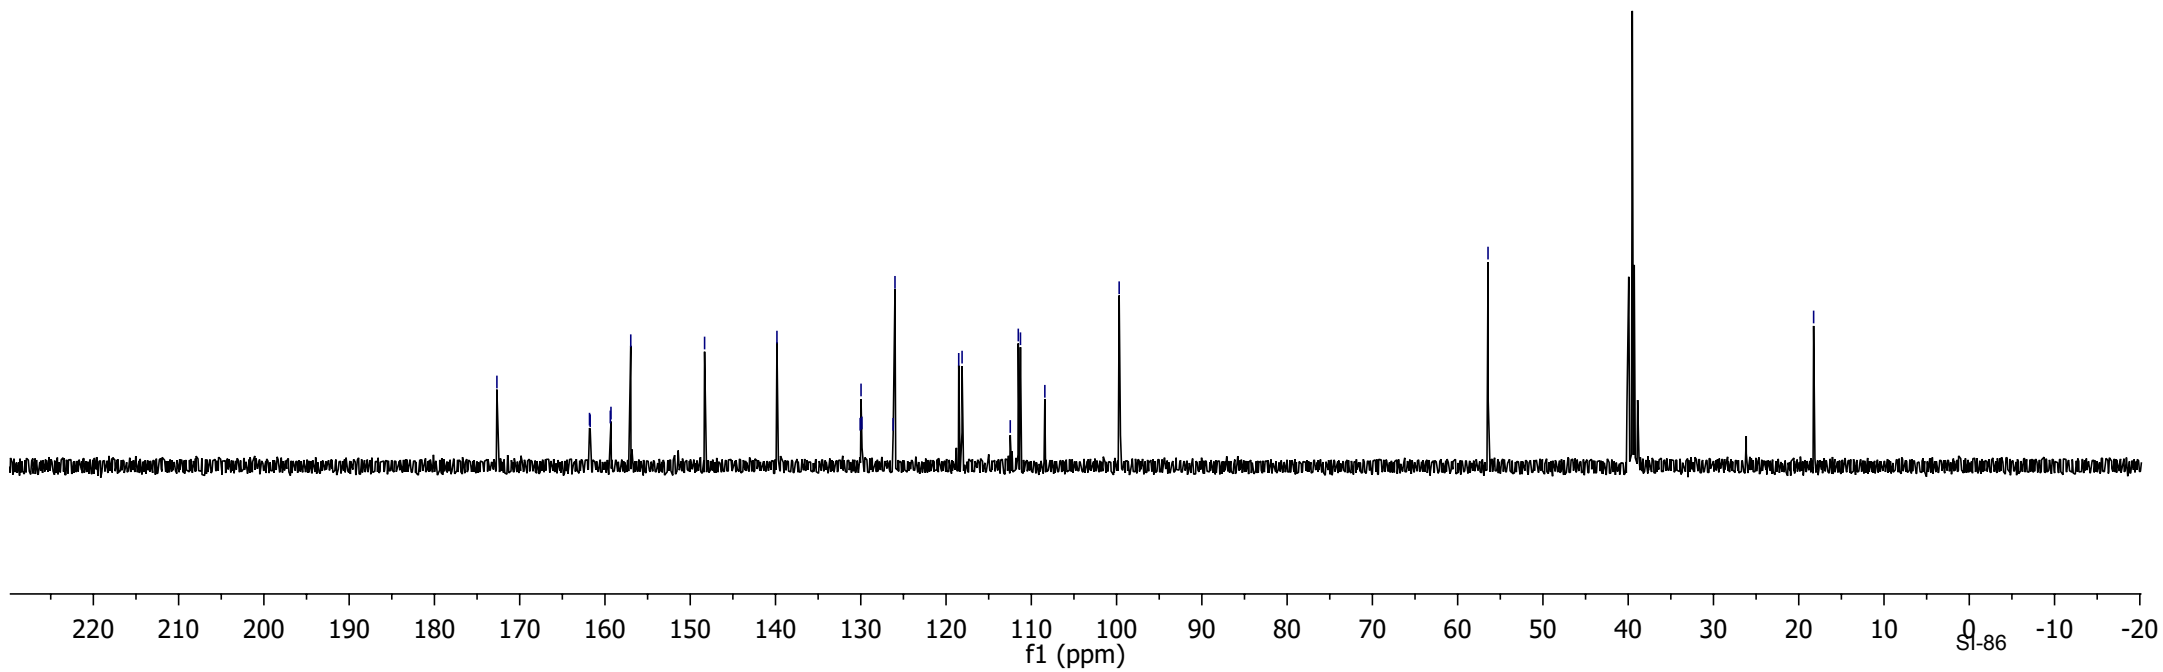



**51**

<sup>19</sup>F, 376 MHz, DMSO

-111.50

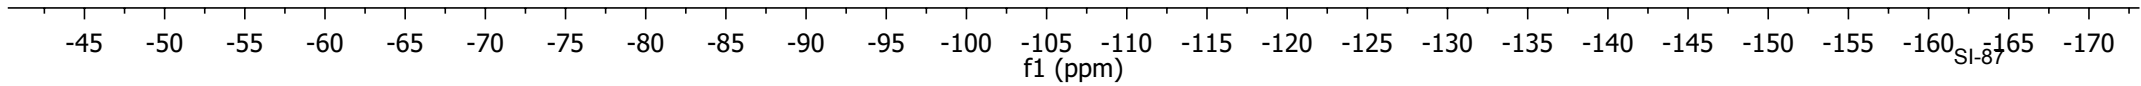



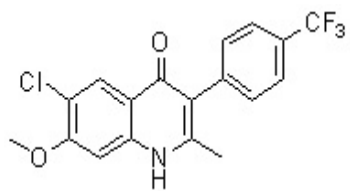

**52**  
<sup>1</sup>H, 400 MHz, DMSO

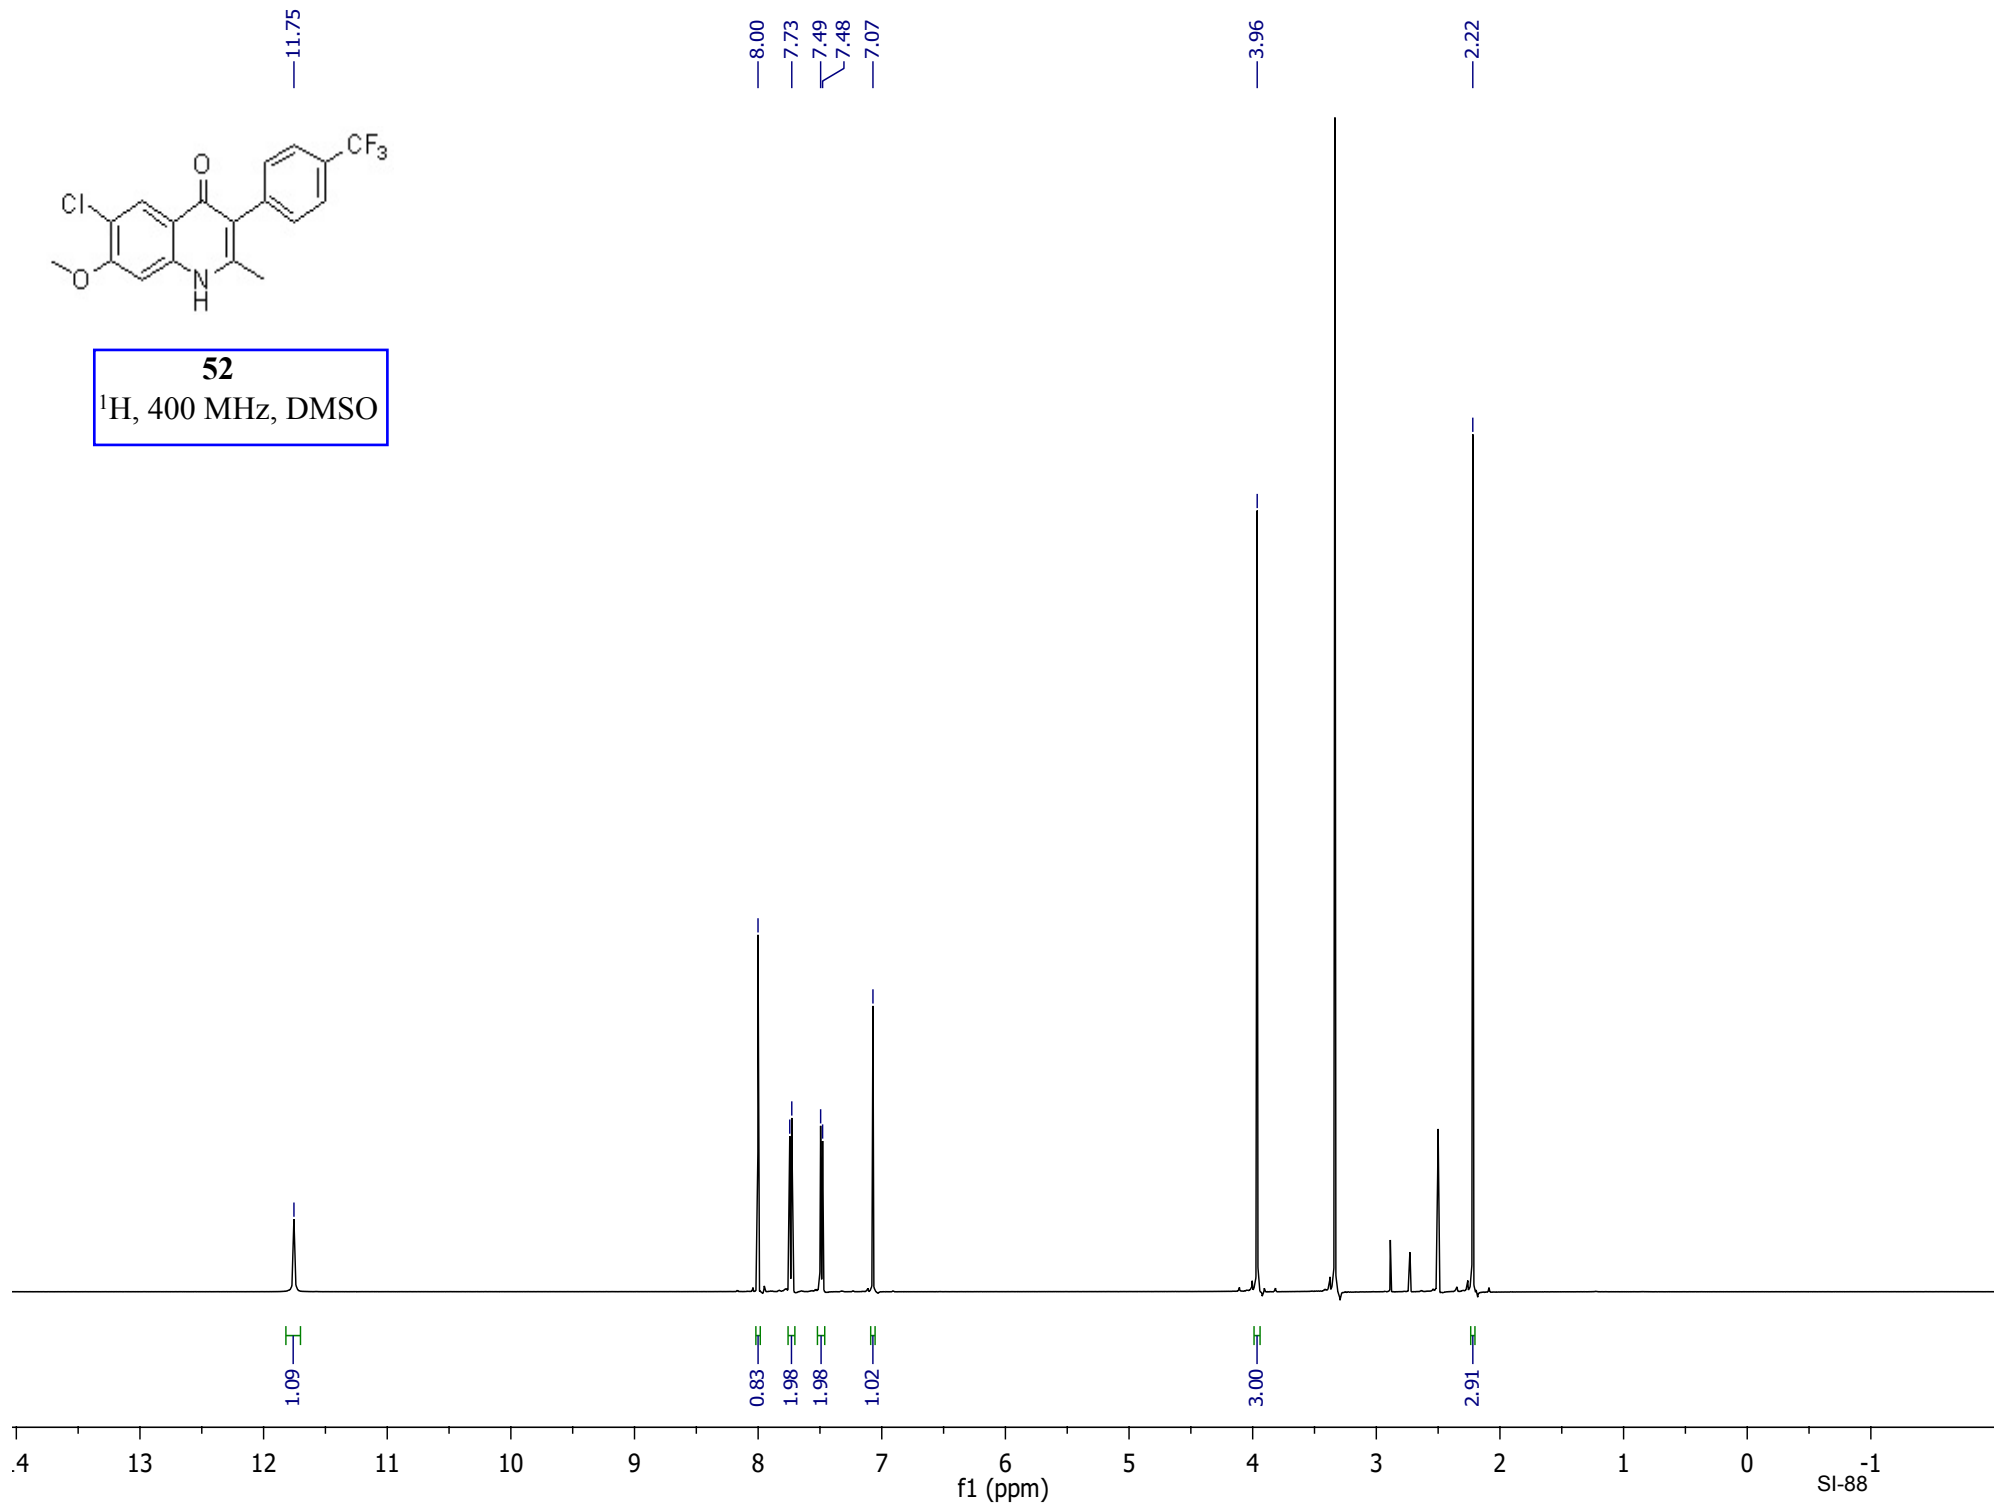

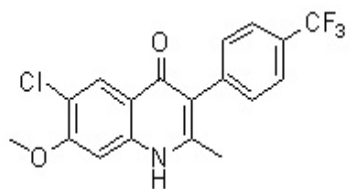

**52**

<sup>13</sup>C, 101 MHz, DMSO

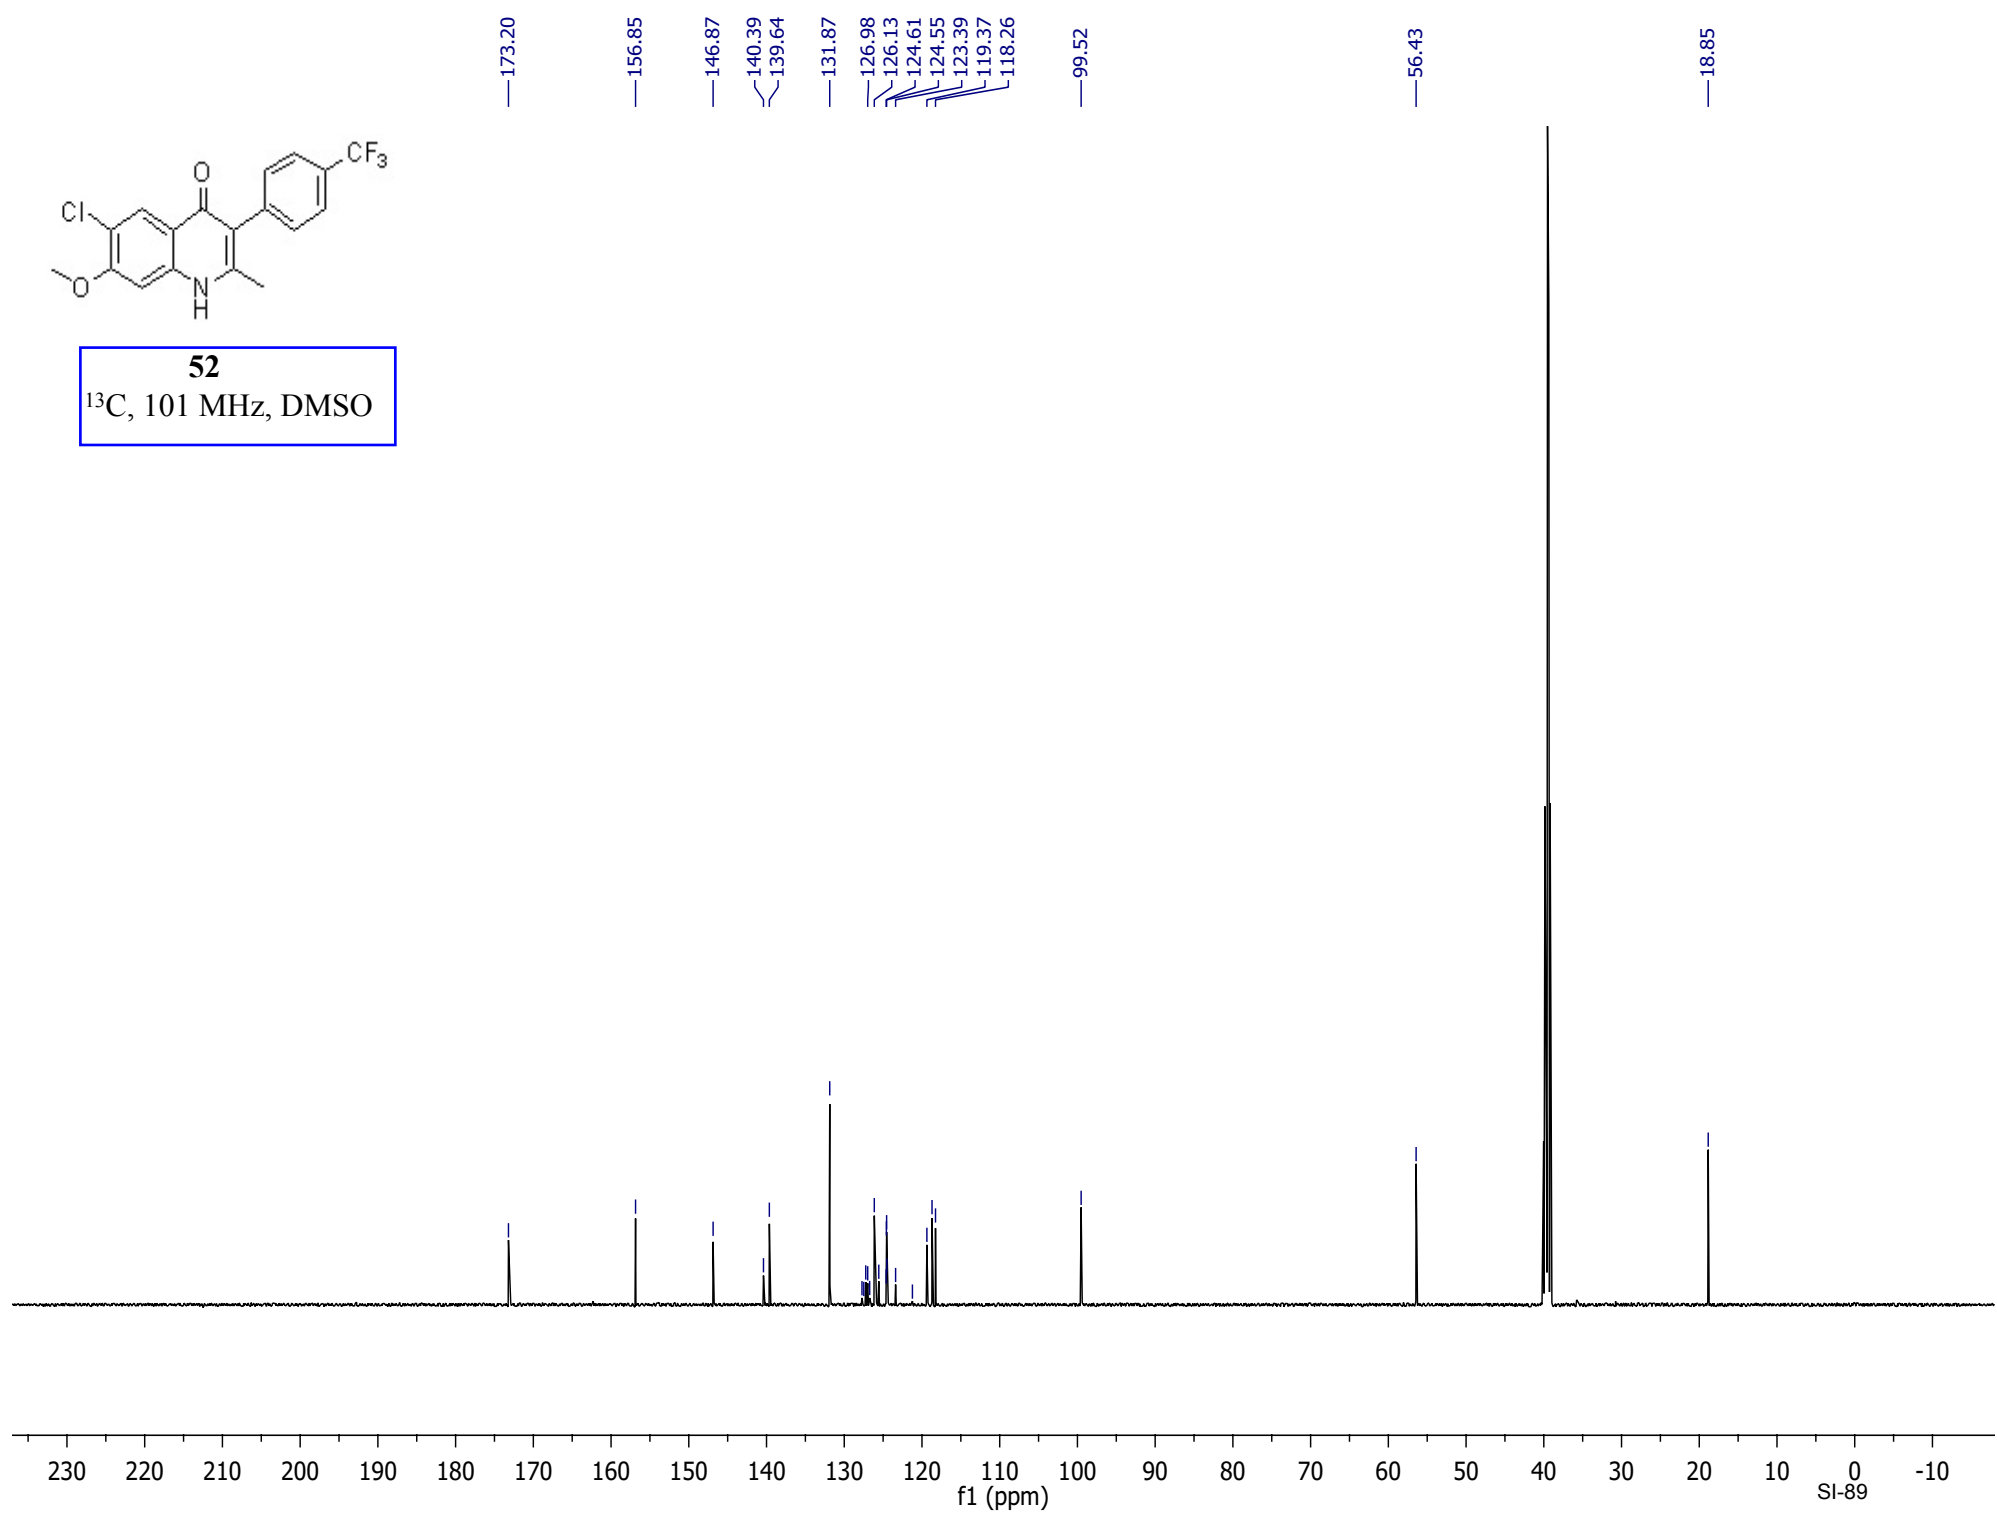

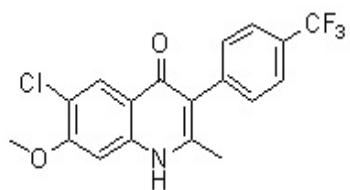

**52**

$^{19}\text{F}$ , 376 MHz, DMSO

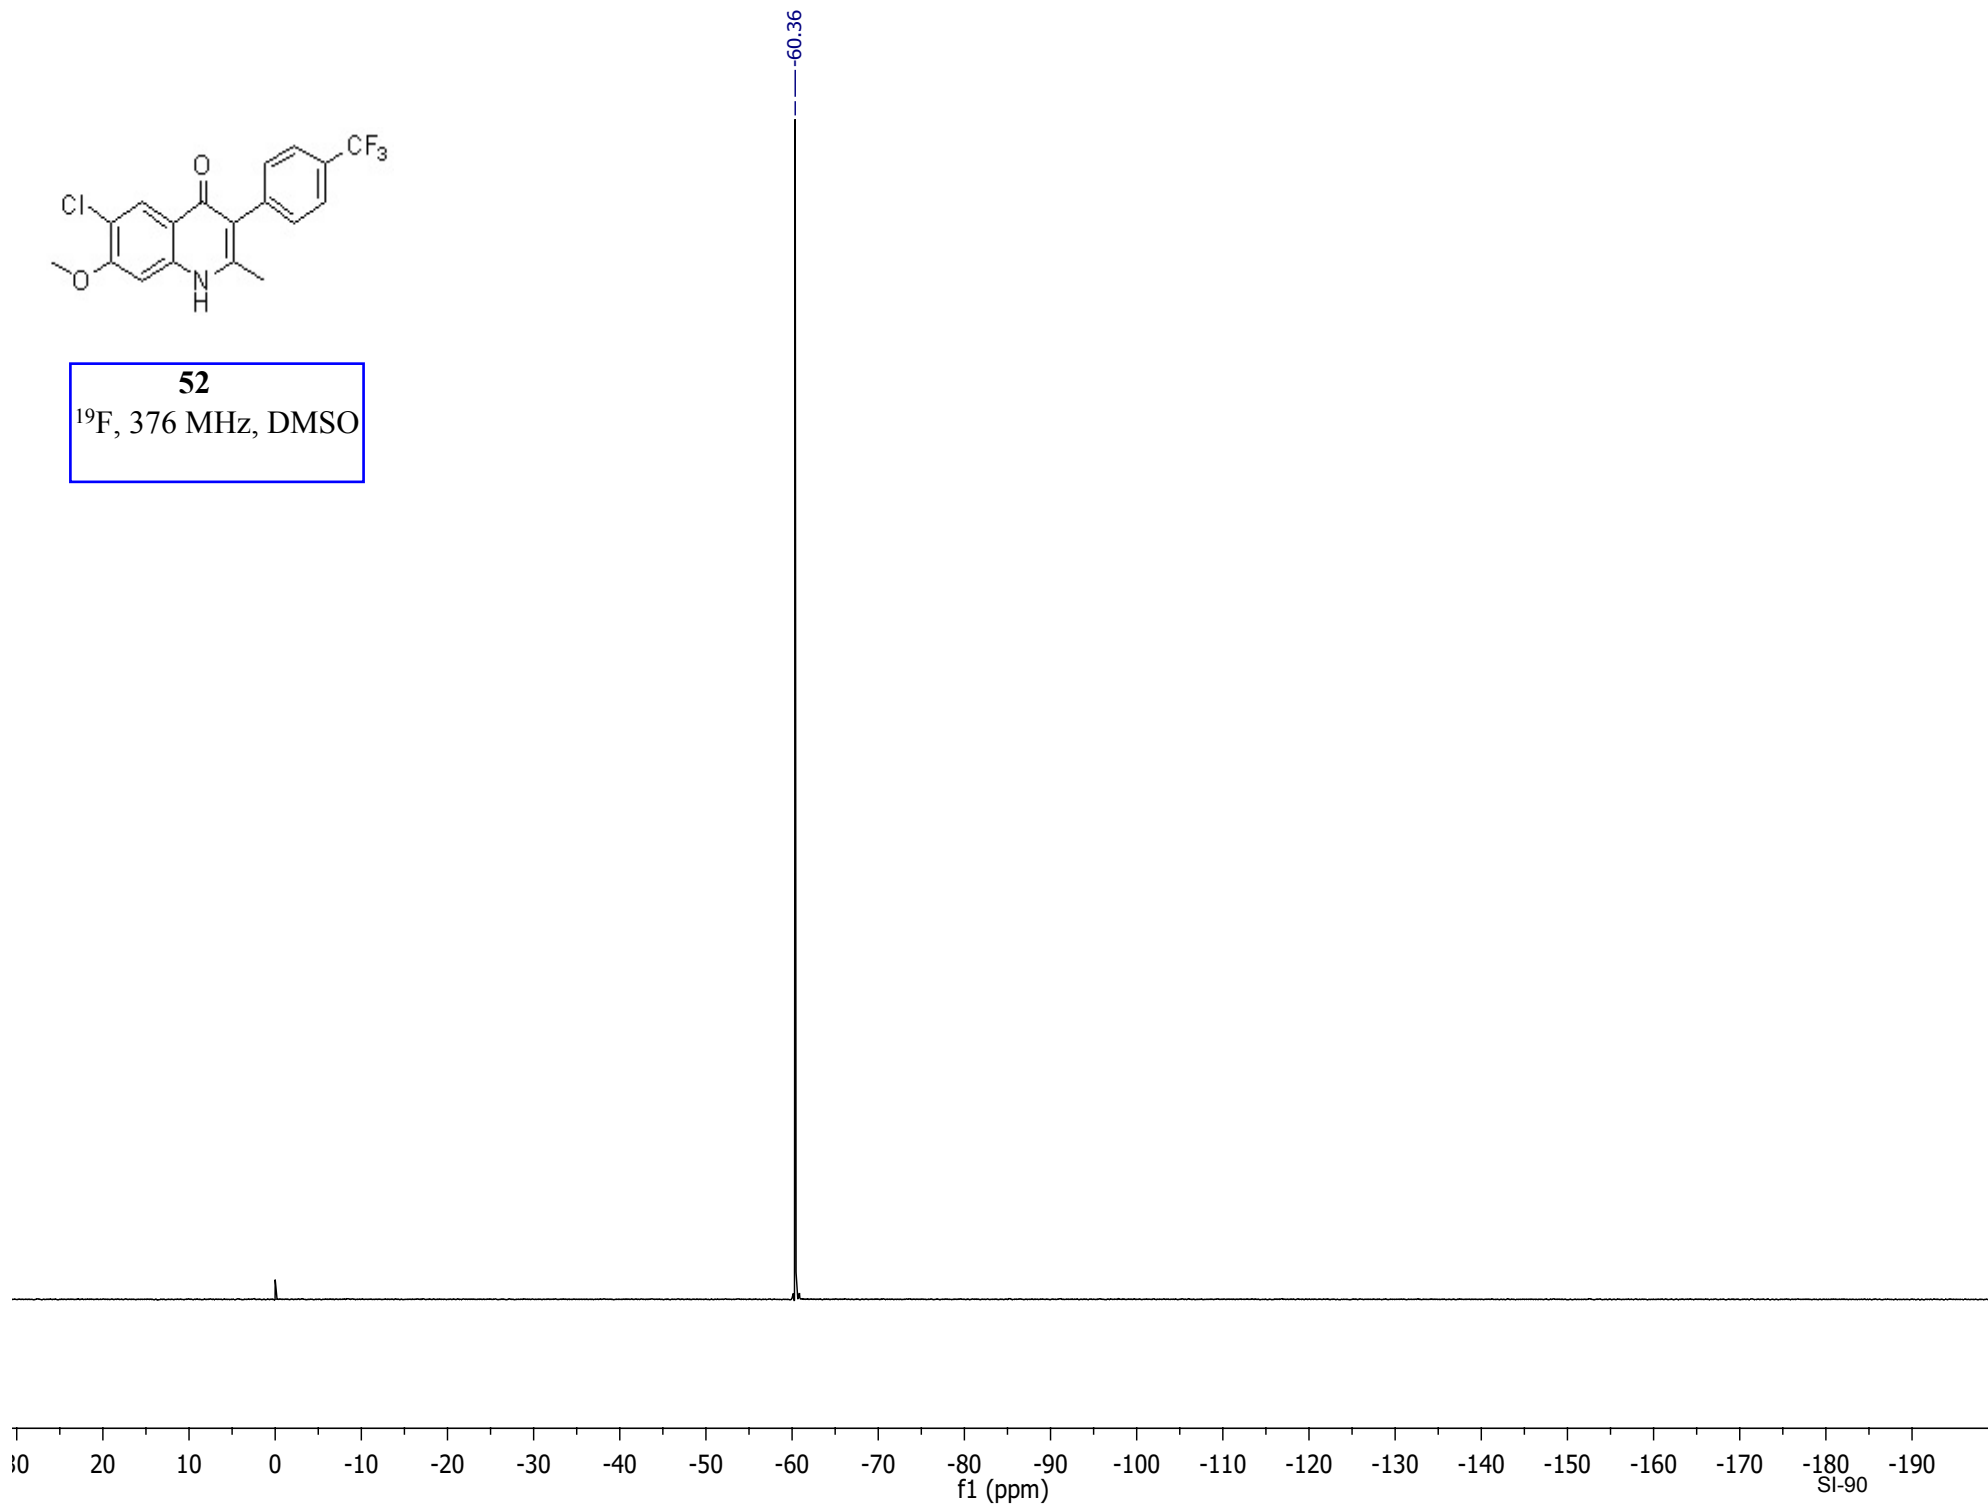

—11.88

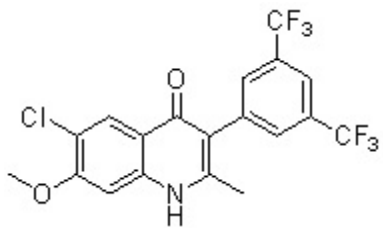

**53**

<sup>1</sup>H, 400 MHz, DMSO

8.03  
8.02  
7.99

—7.10

—3.98

—2.28

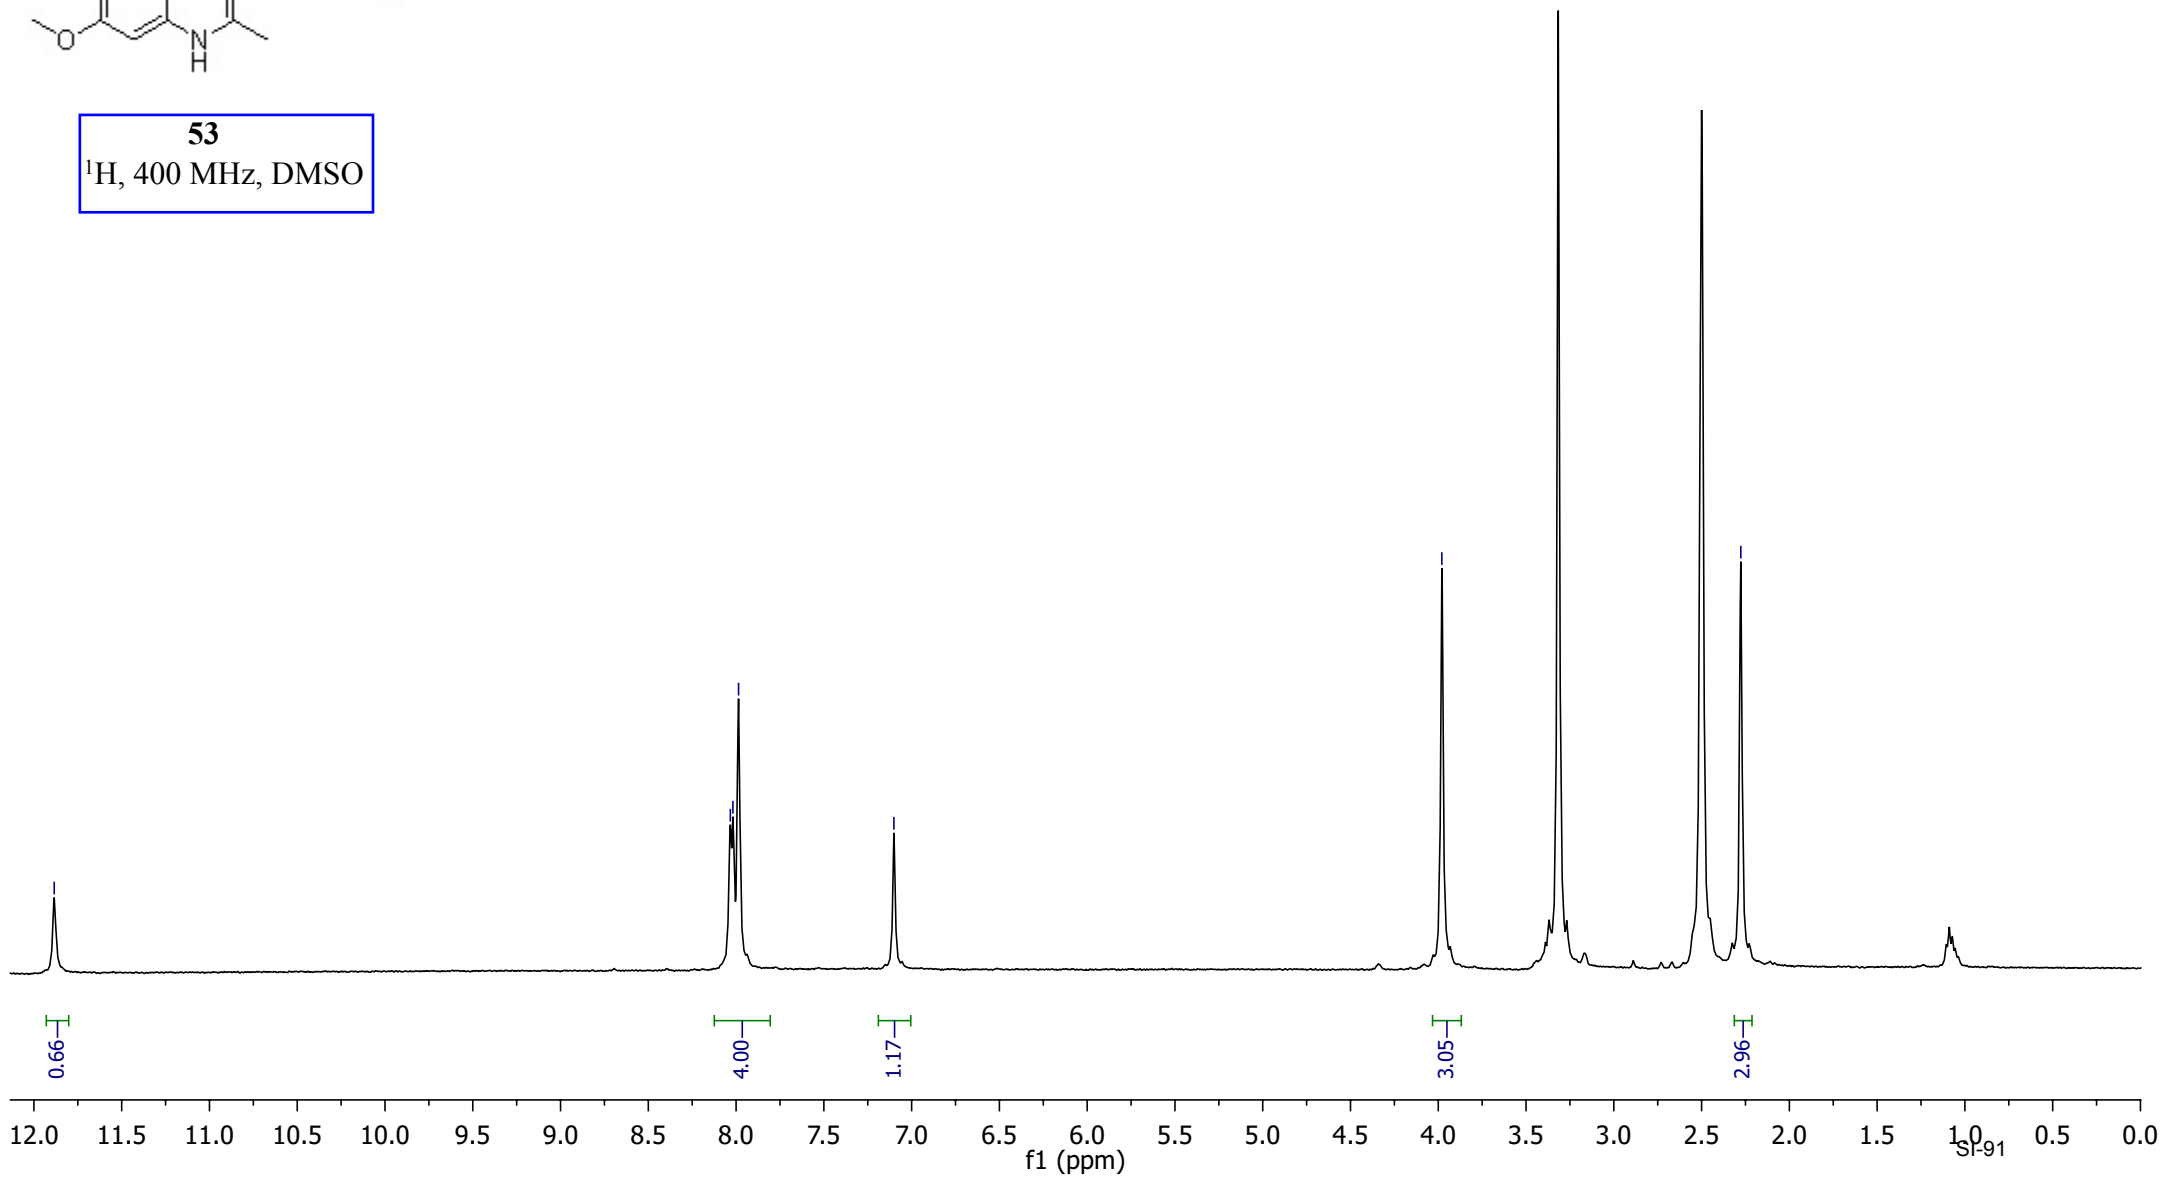

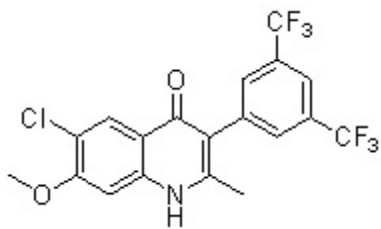

**53**

$^{13}\text{C}$ , 101 MHz, DMSO

—172.99

—156.99

—147.62

139.63

138.52

131.83

130.21

129.89

129.57

129.24

127.54

126.08

124.84

122.13

120.24

119.44

118.60

118.48

117.67

99.60

—56.43

—18.84

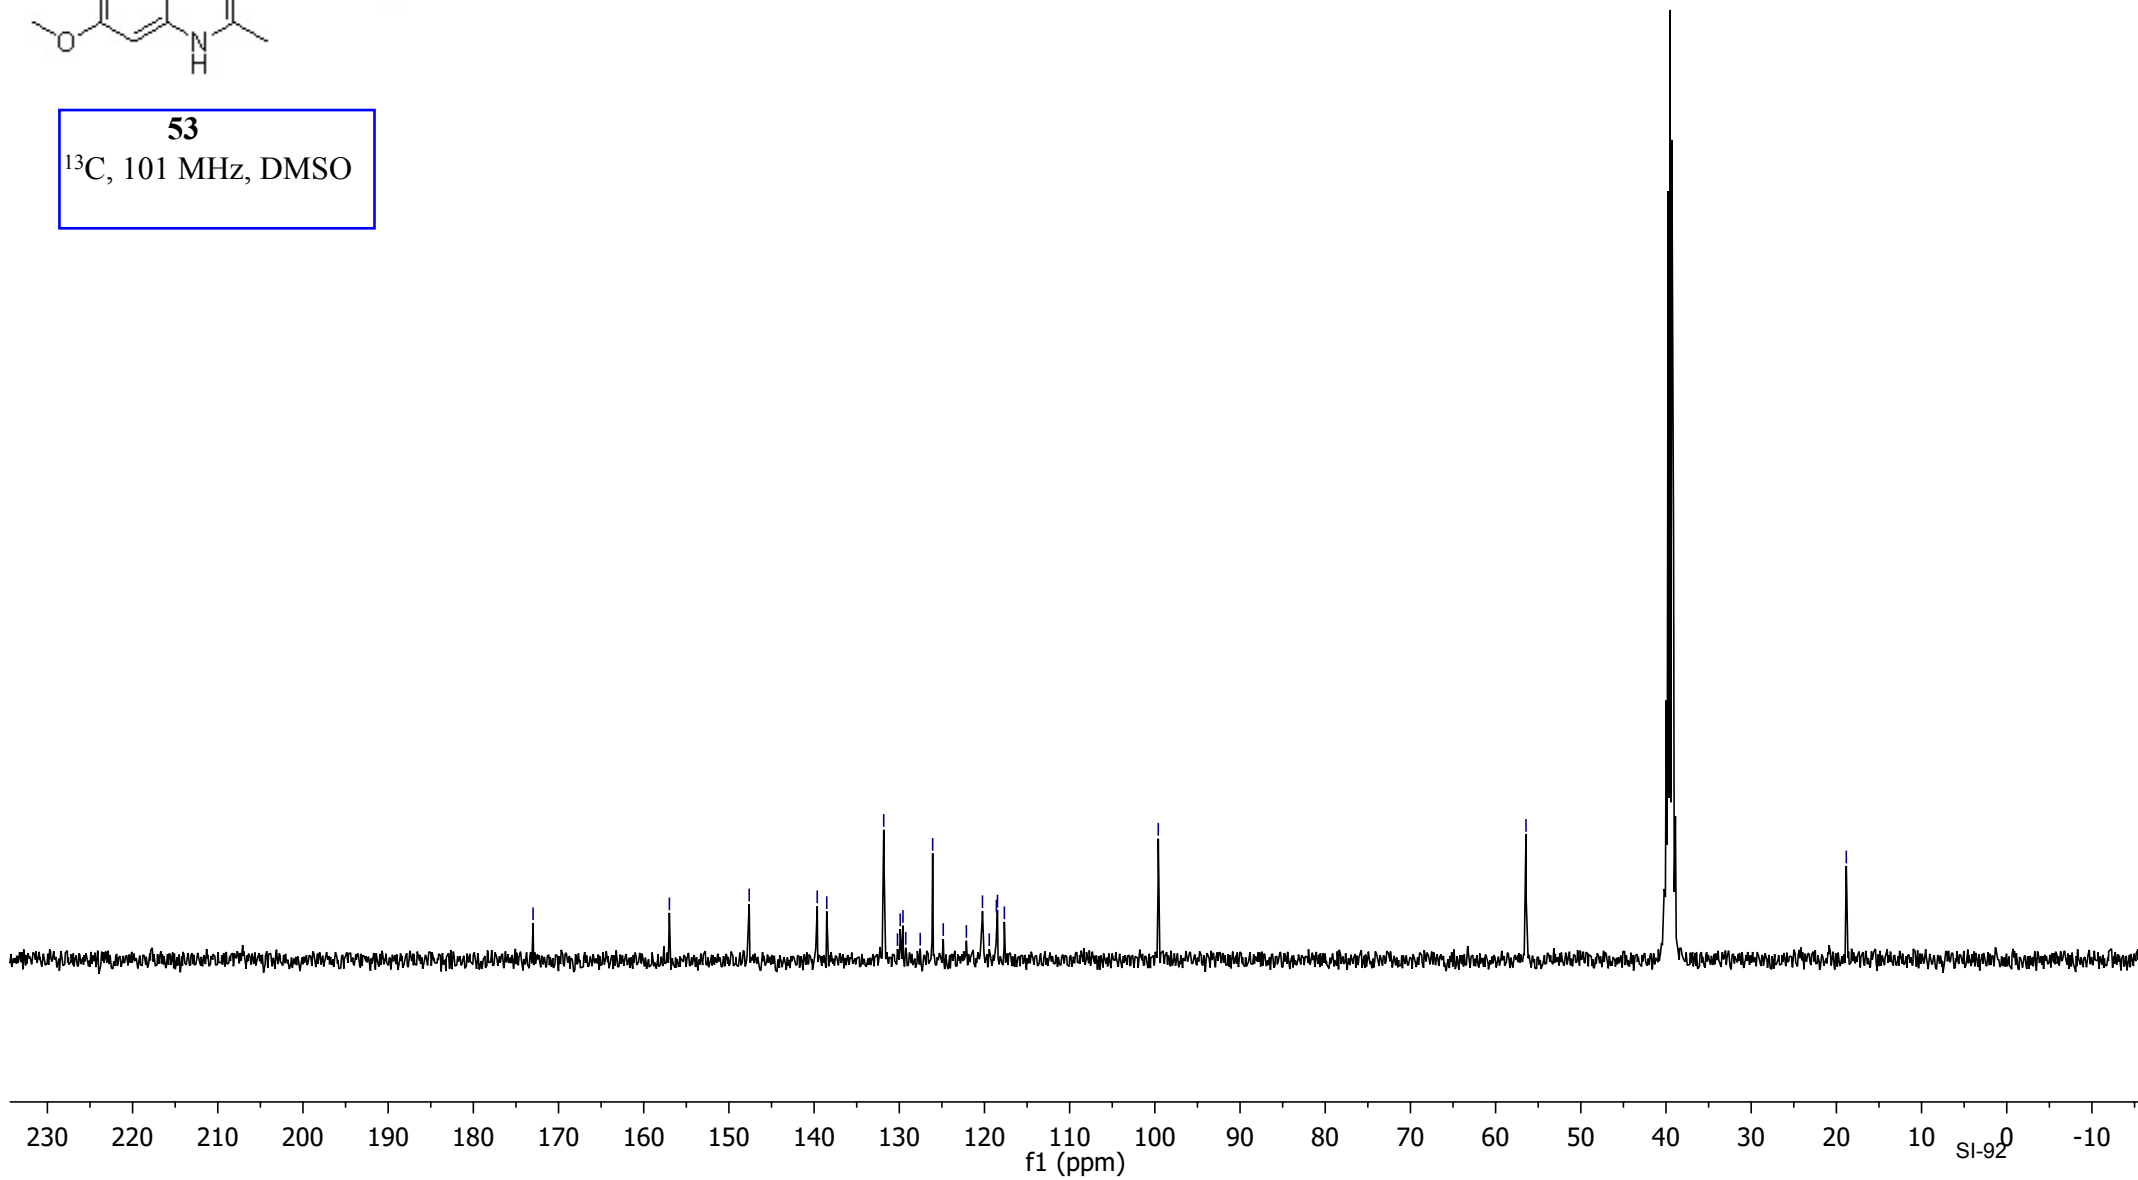

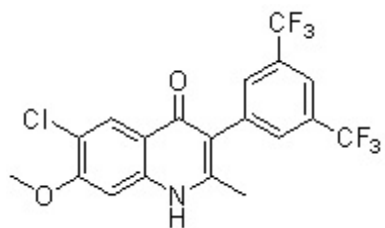

**53**

$^{19}\text{F}$ , 376 MHz, DMSO

-61.54

-45 -50 -55 -60 -65 -70 -75 -80 -85 -90 -95 -100 -105 -110 -115 -120 -125 -130 -135 -140 -145 -150 -155 -160 -165 -170  
f1 (ppm) SI-93

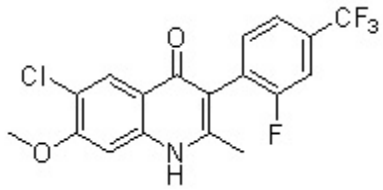

**54**  
<sup>1</sup>H, 400 MHz, DMSO

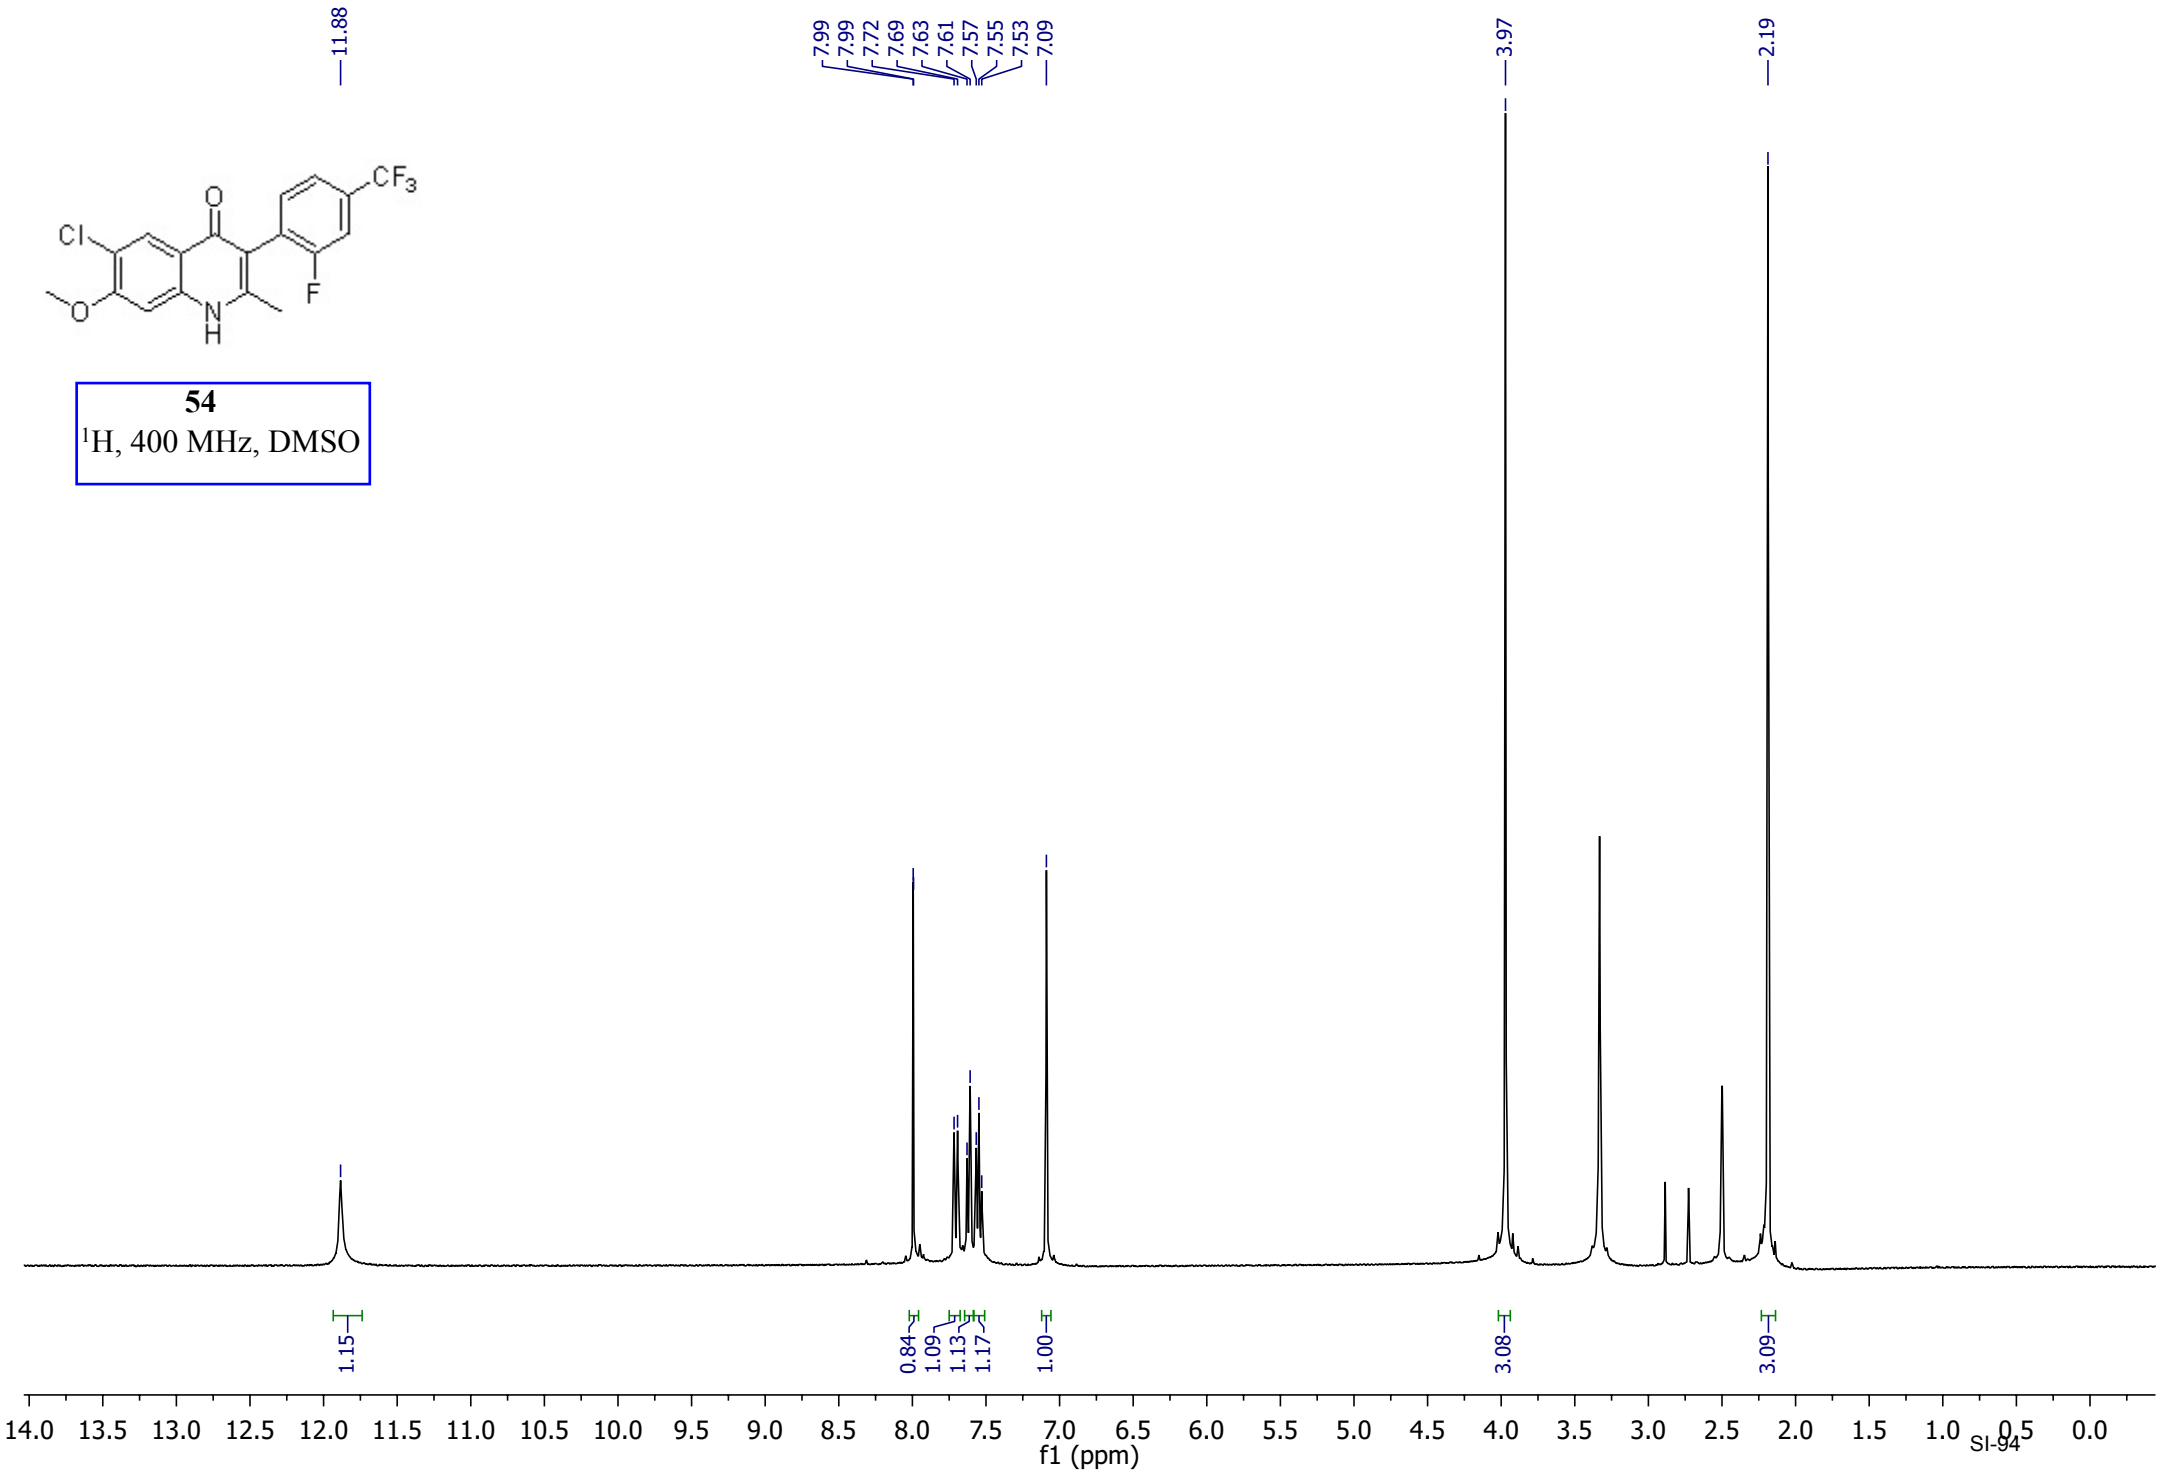

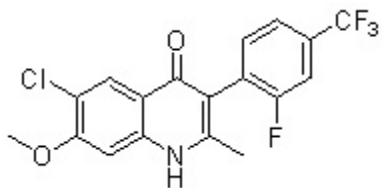

**54**

$^{13}\text{C}$ , 101 MHz, DMSO

- 173.20
- 161.57
- 159.12
- 157.41
- 148.12
- 140.19
- 135.15
- 135.09
- 135.05
- 135.01
- 130.25
- 130.01
- 128.68
- 128.66
- 128.49
- 126.44
- 121.31
- 121.28
- 121.24
- 121.20
- 118.93
- 118.74
- 113.88
- 113.41
- 113.36
- 113.33
- 113.24
- 113.13
- 113.10
- 113.06
- 100.08
- 56.88
- 18.87

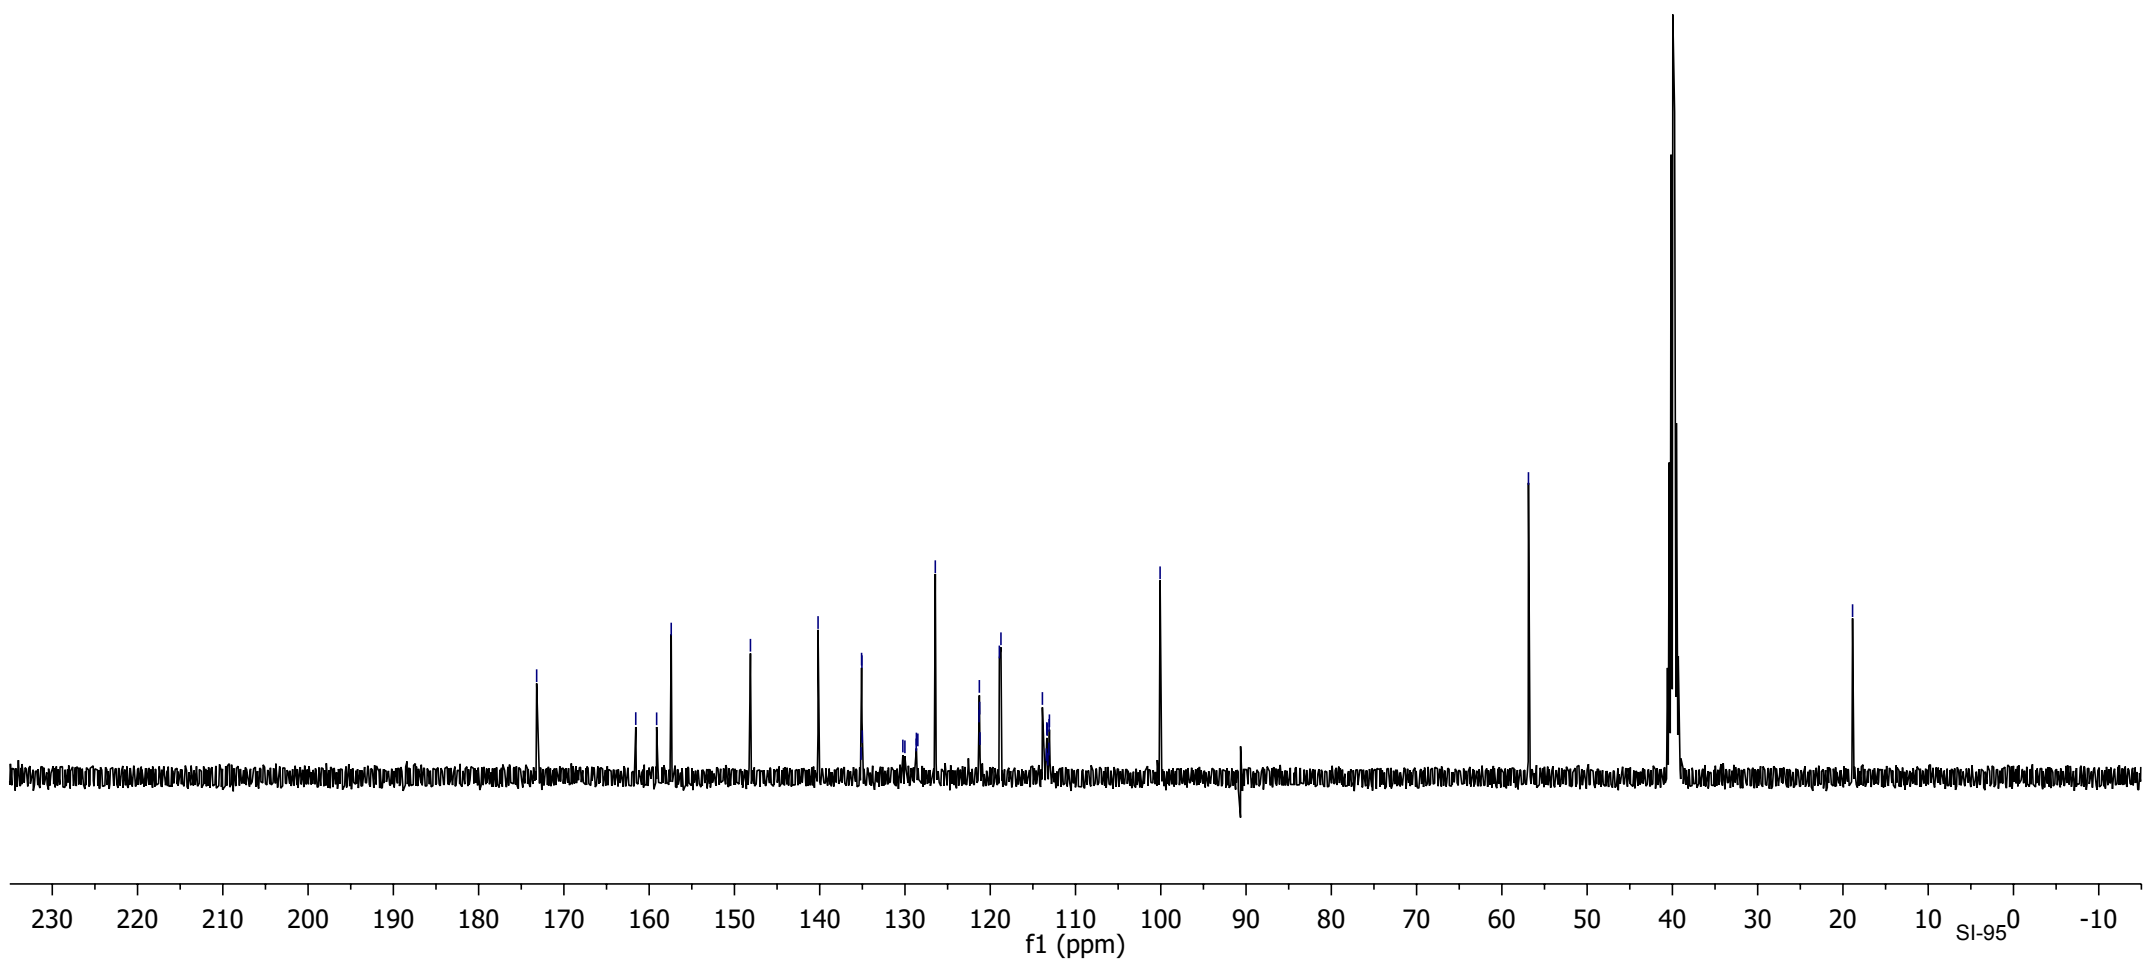



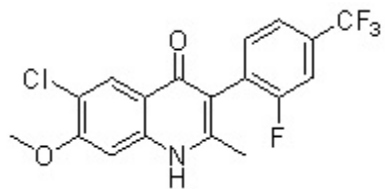

**54**  
<sup>19</sup>F, 376 MHz, DMSO

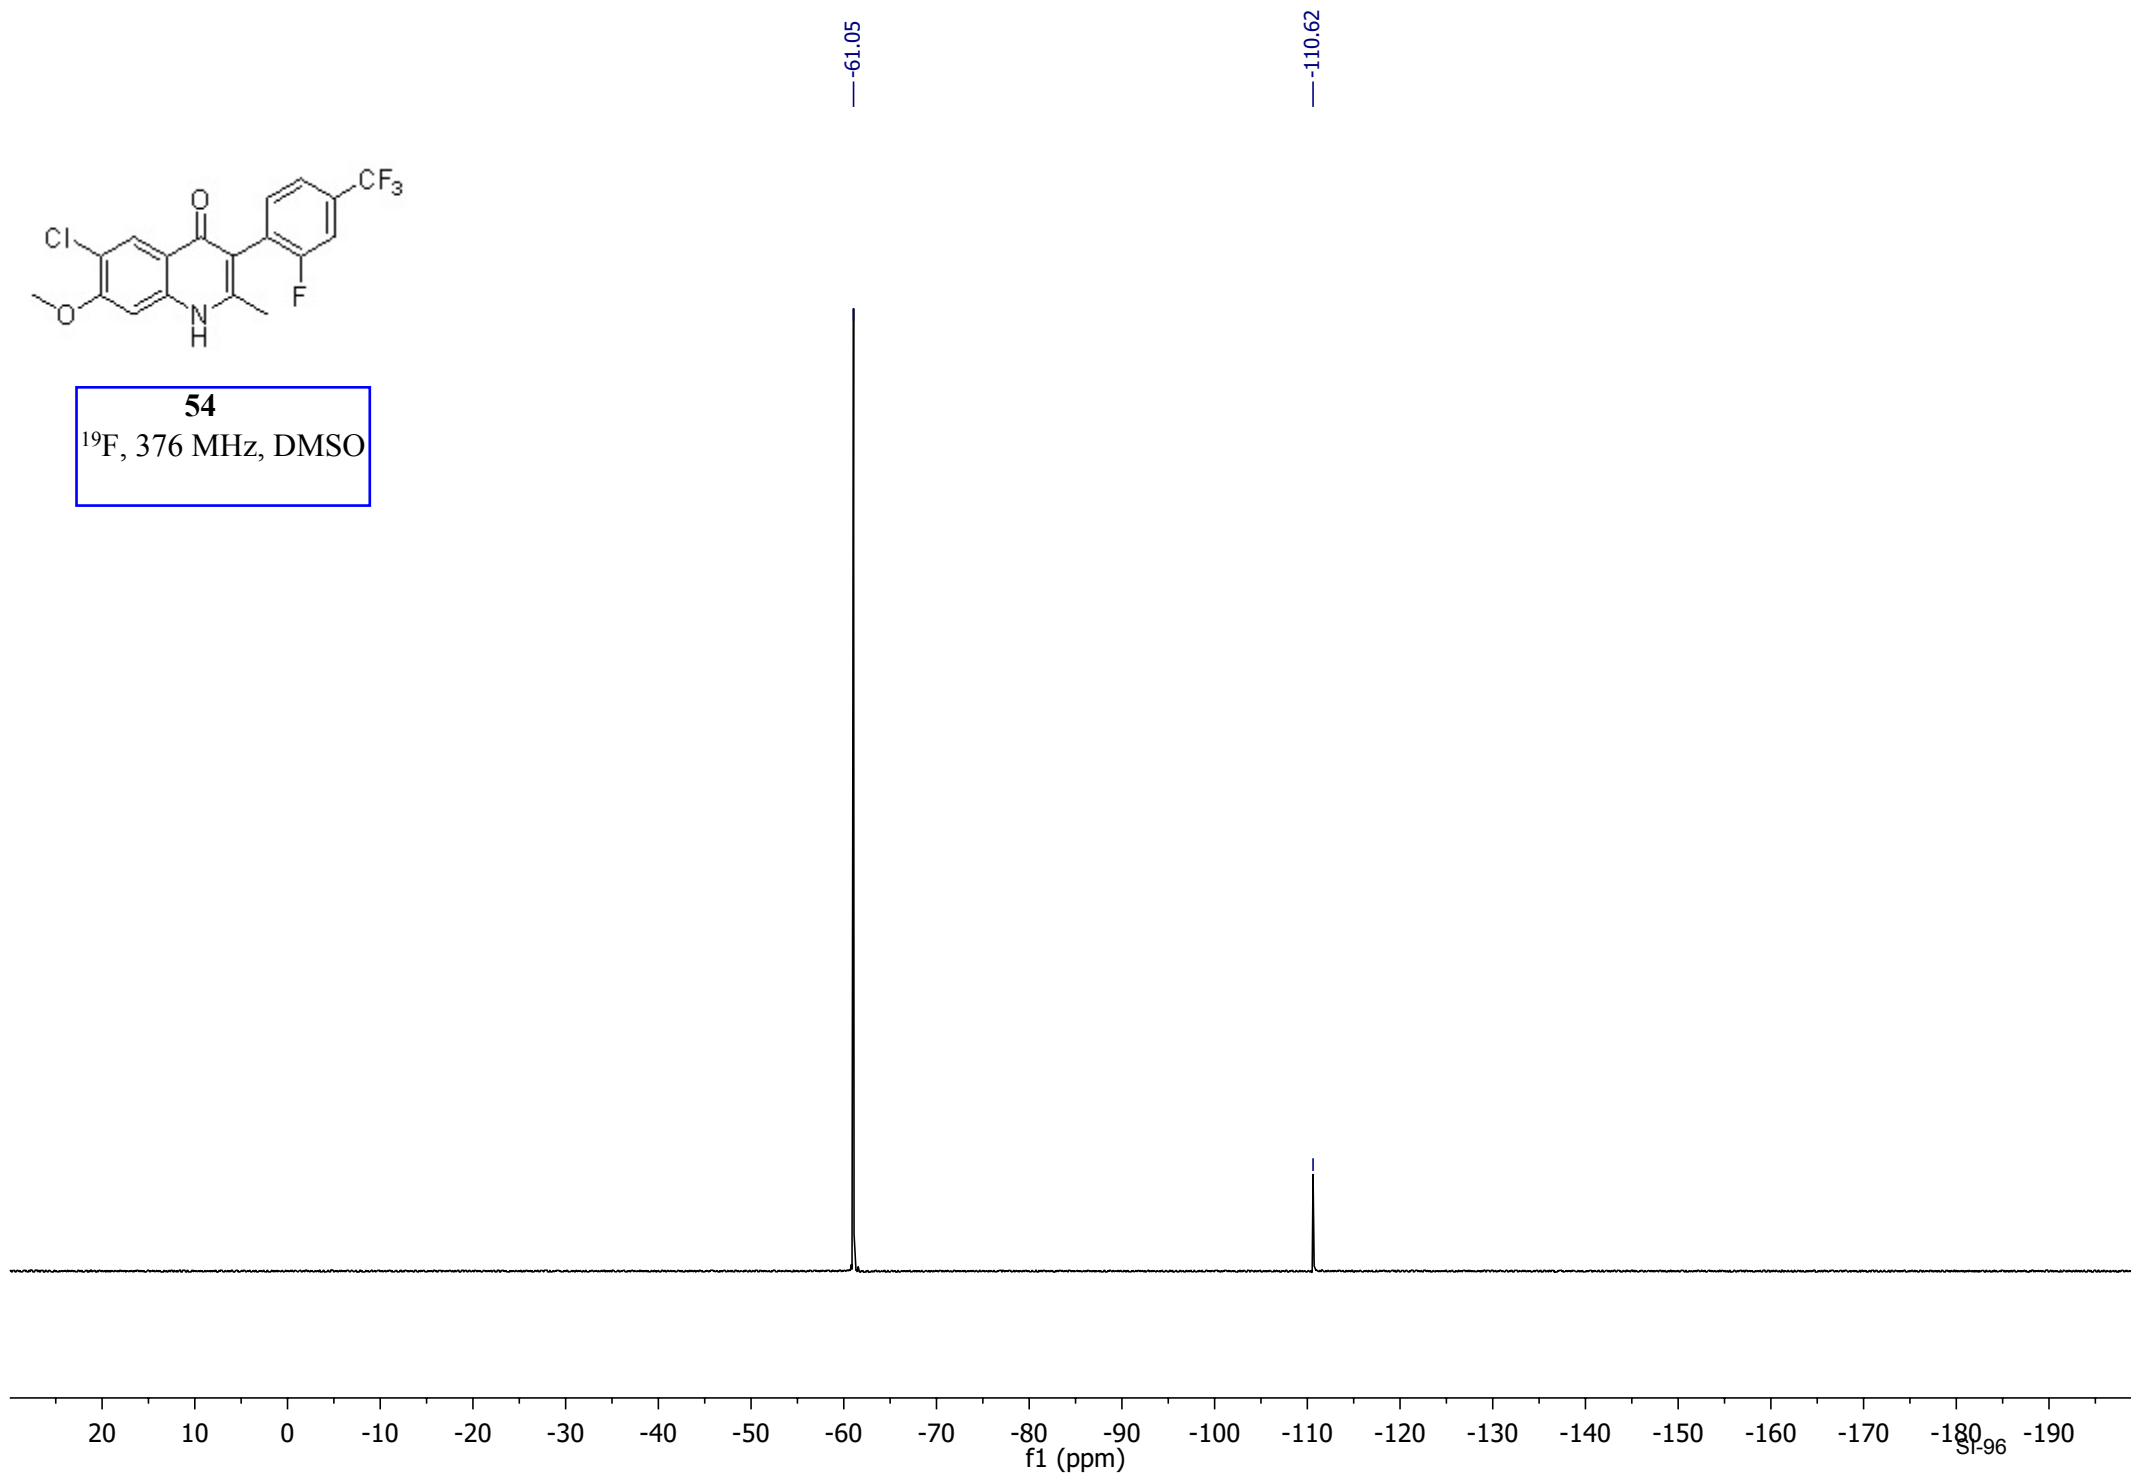

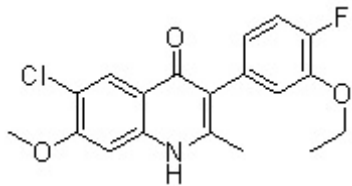

**55**  
 $^1\text{H}$ , 400 MHz, DMSO

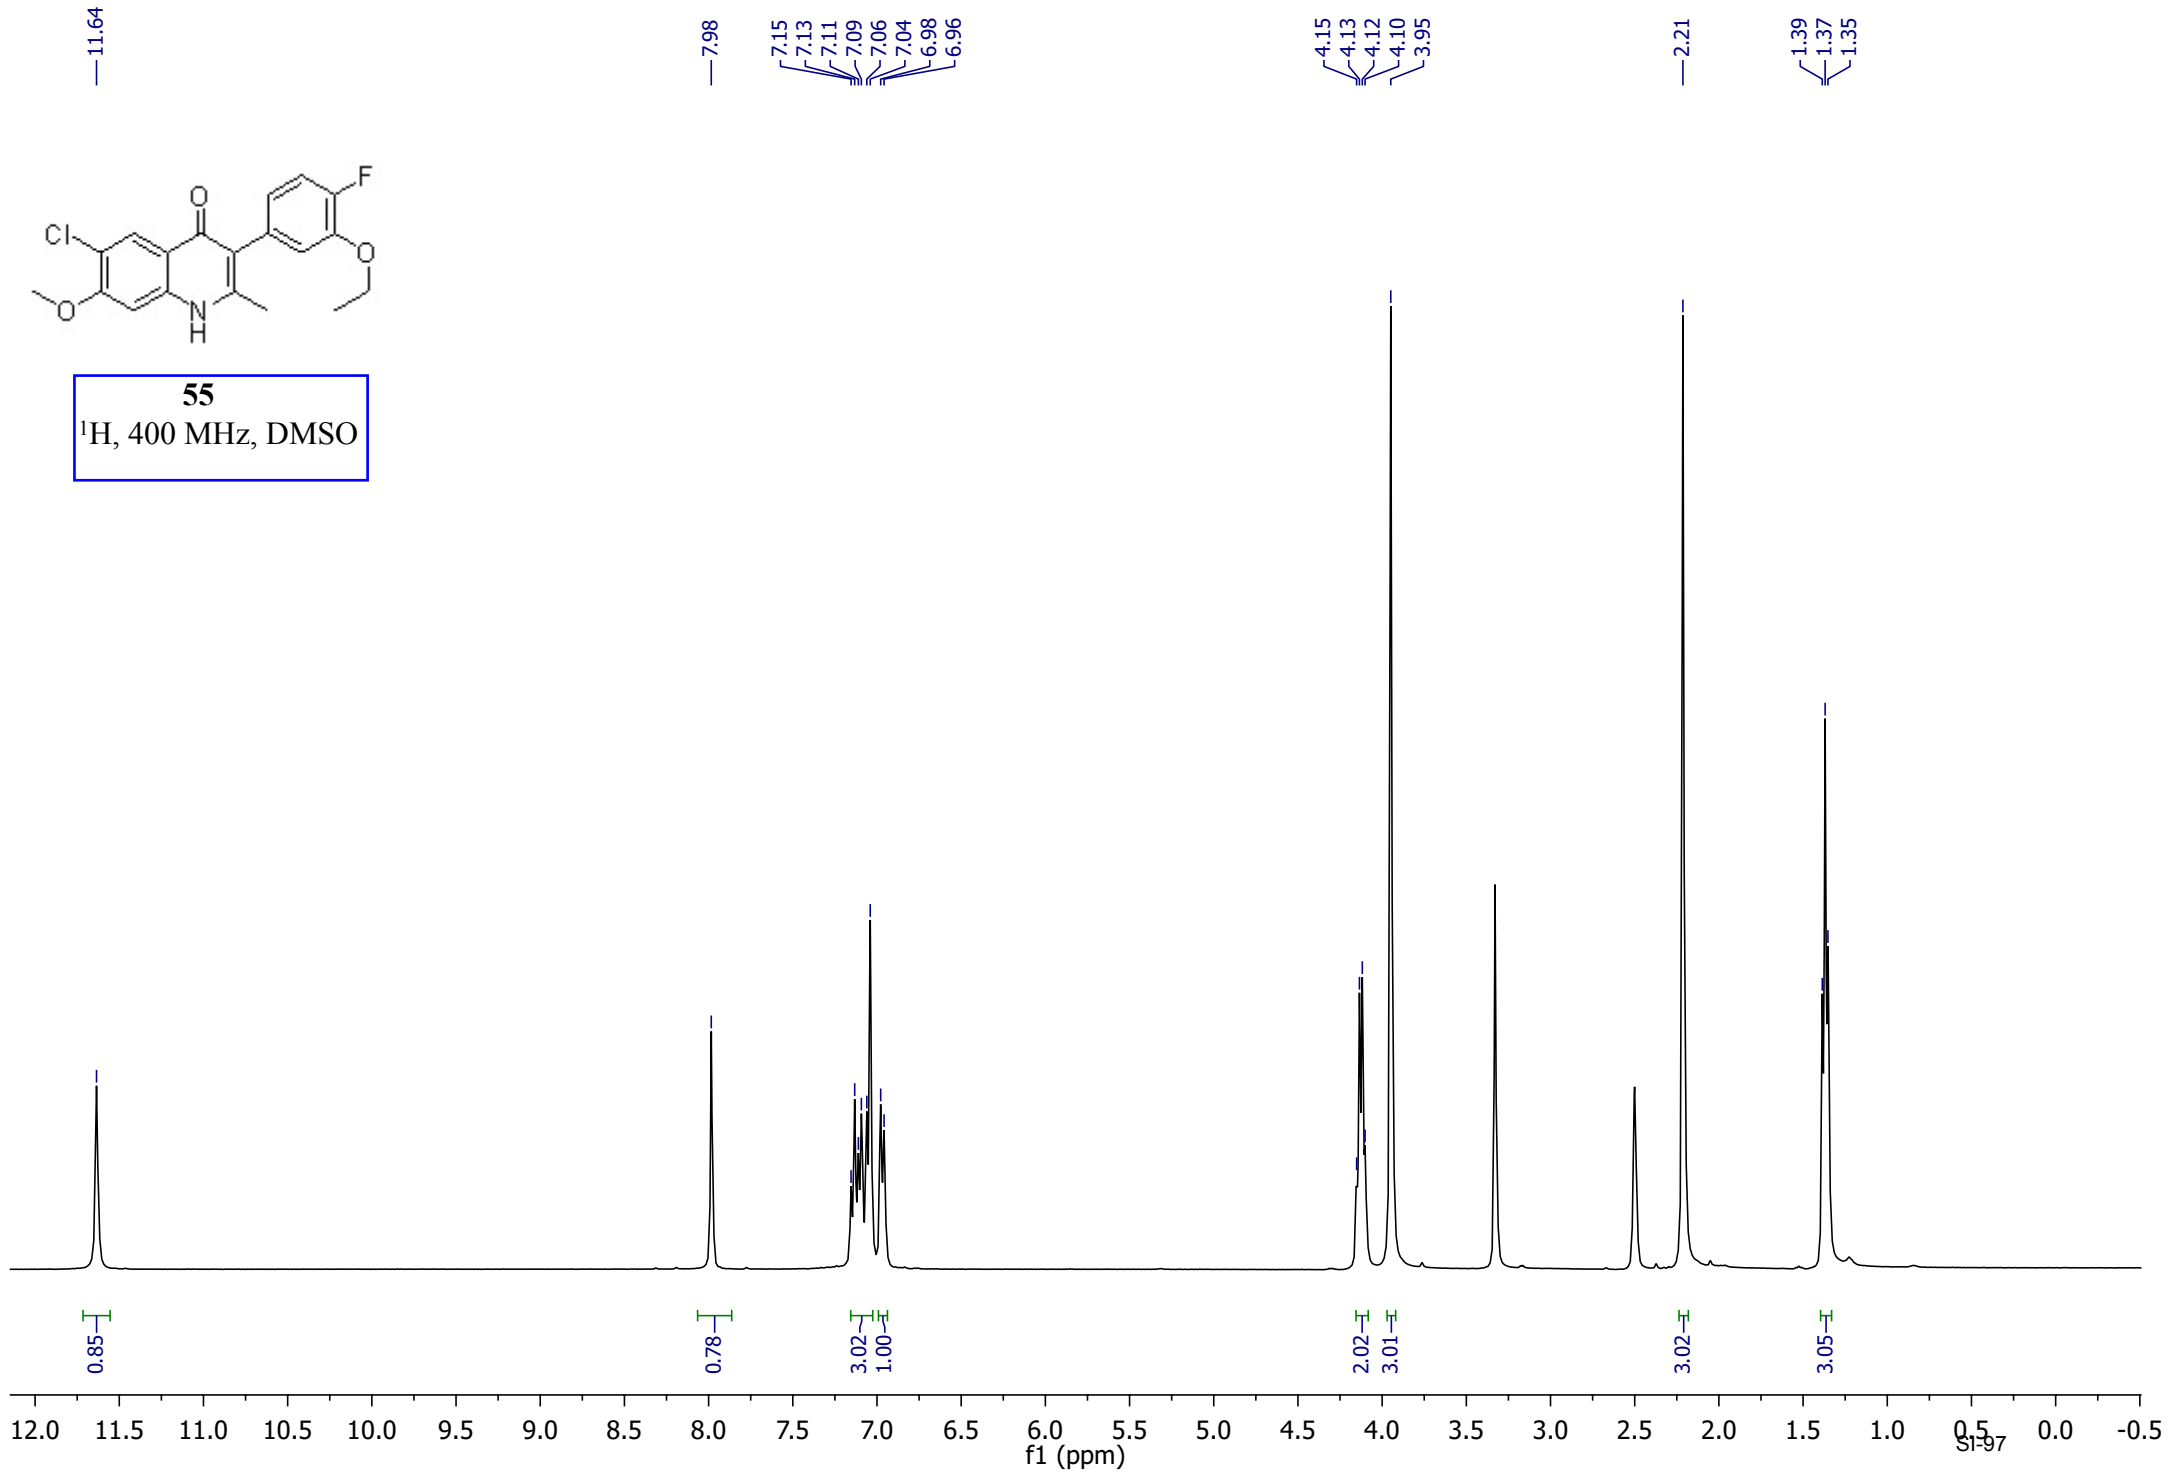

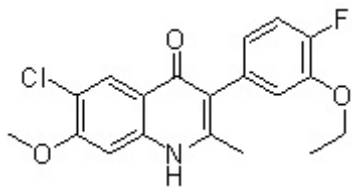

55

$^{13}\text{C}$ , 101 MHz, DMSO

—174.12

—157.34

—152.96

—150.55

—147.38

—145.67

—145.56

—140.19

—129.15

—127.81

—126.82

—120.04

—119.36

—119.21

—119.03

—118.66

—114.75

—100.06

—64.90

—57.03

—19.54

—15.33

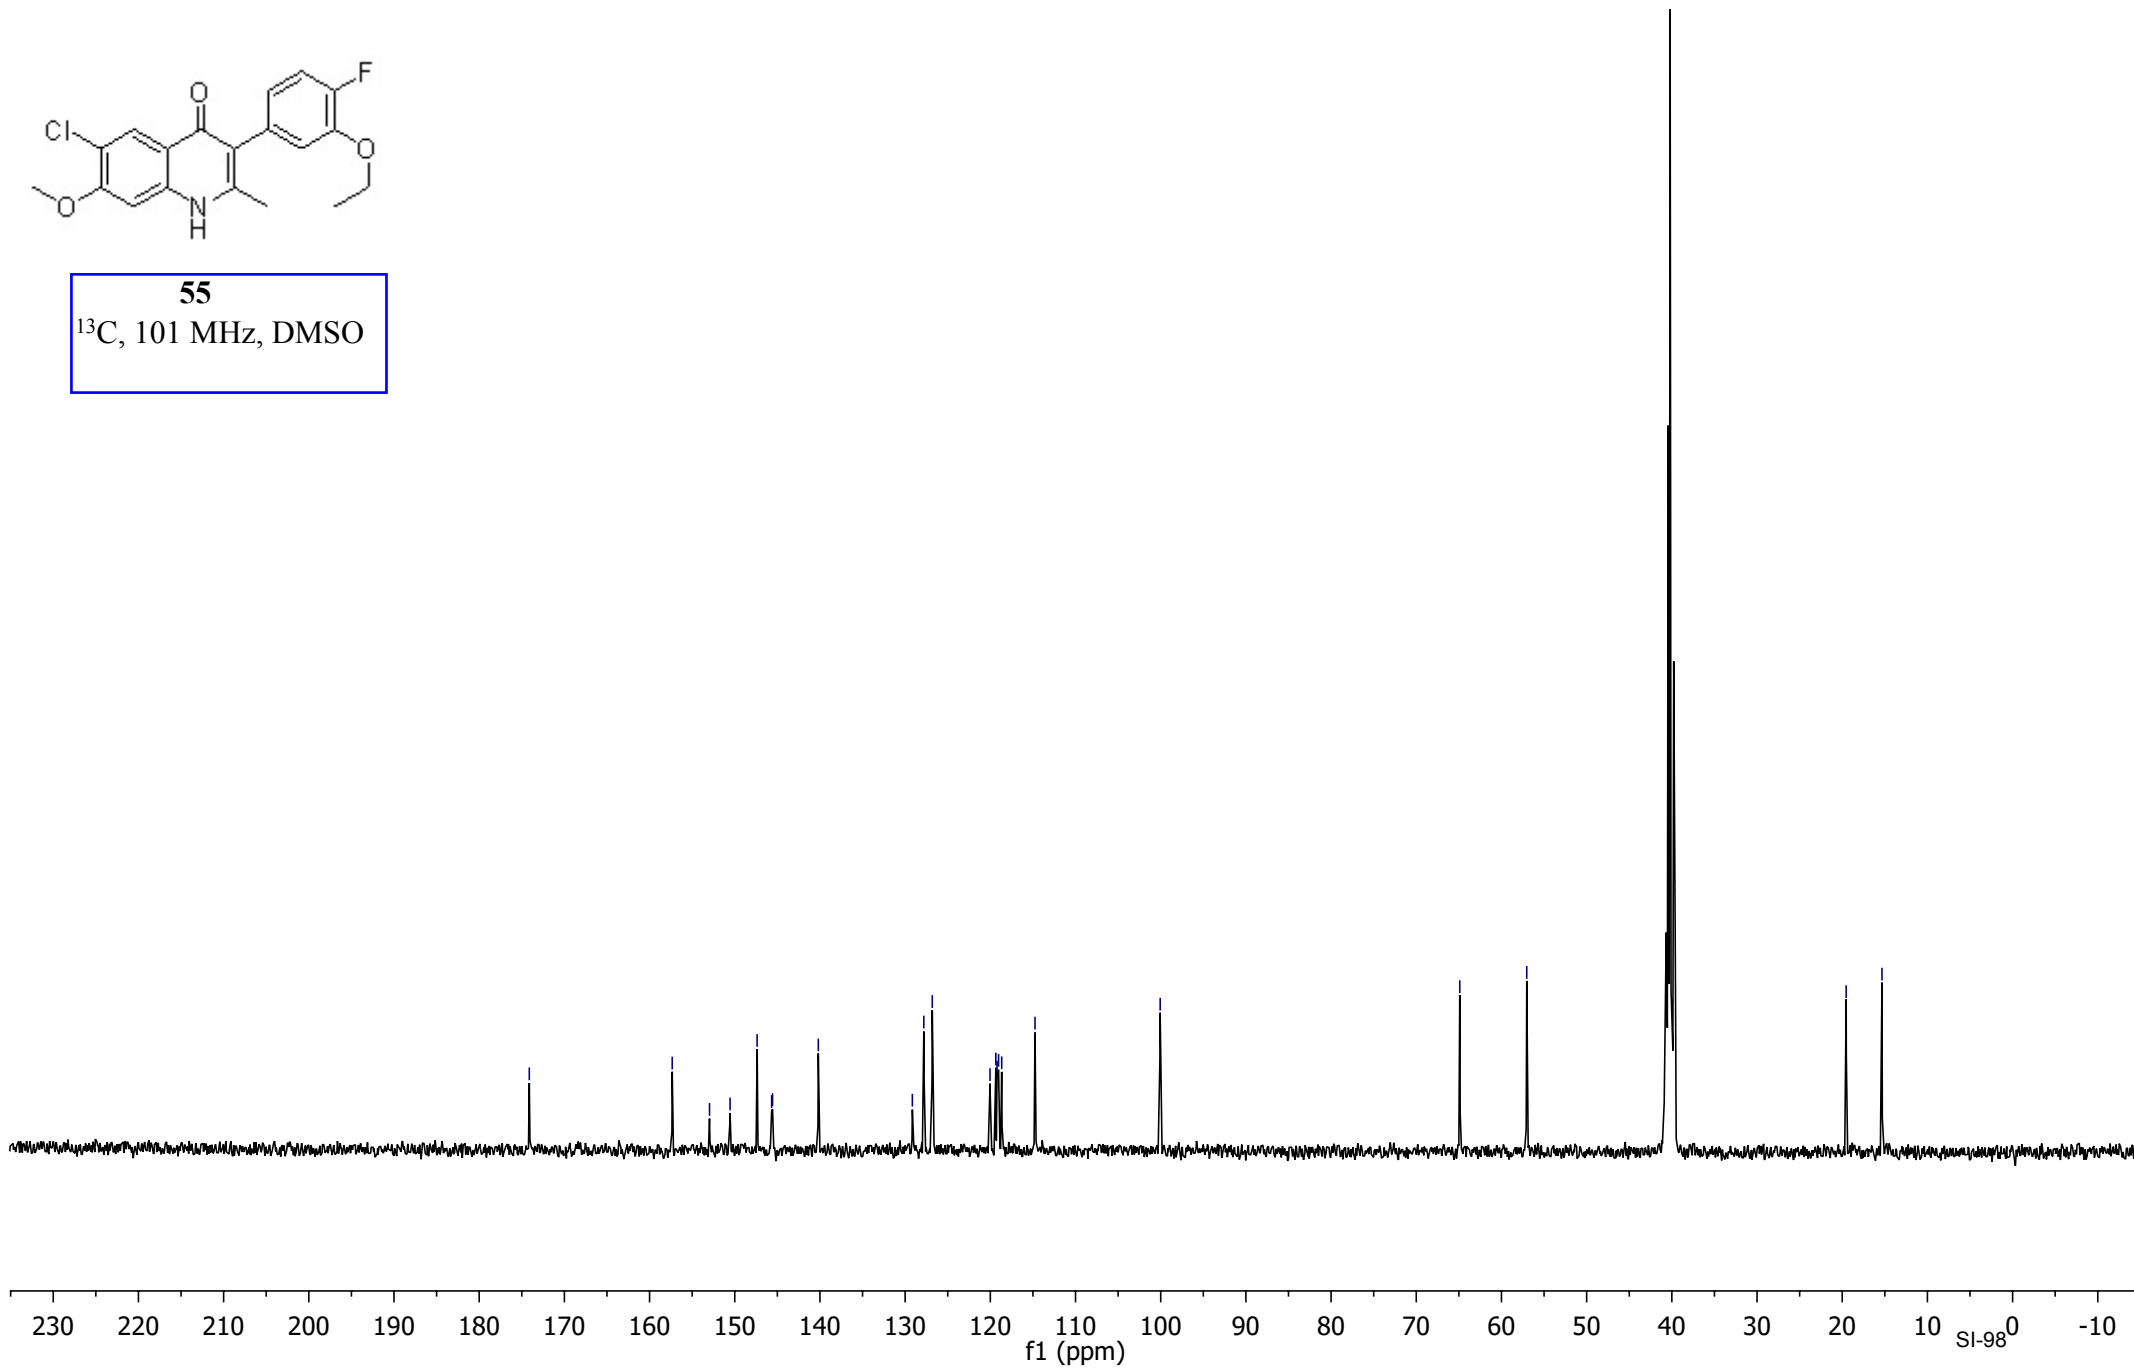

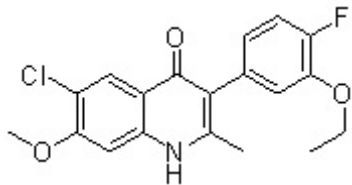

**55**

<sup>19</sup>F, 376 MHz, DMSO

— -136.21

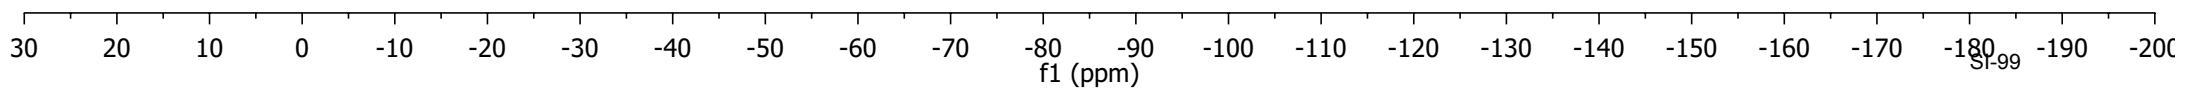

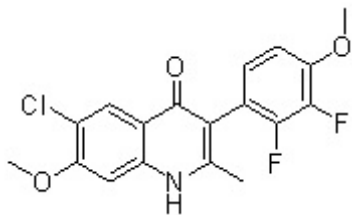

**56**

<sup>1</sup>H, 400 MHz, DMSO

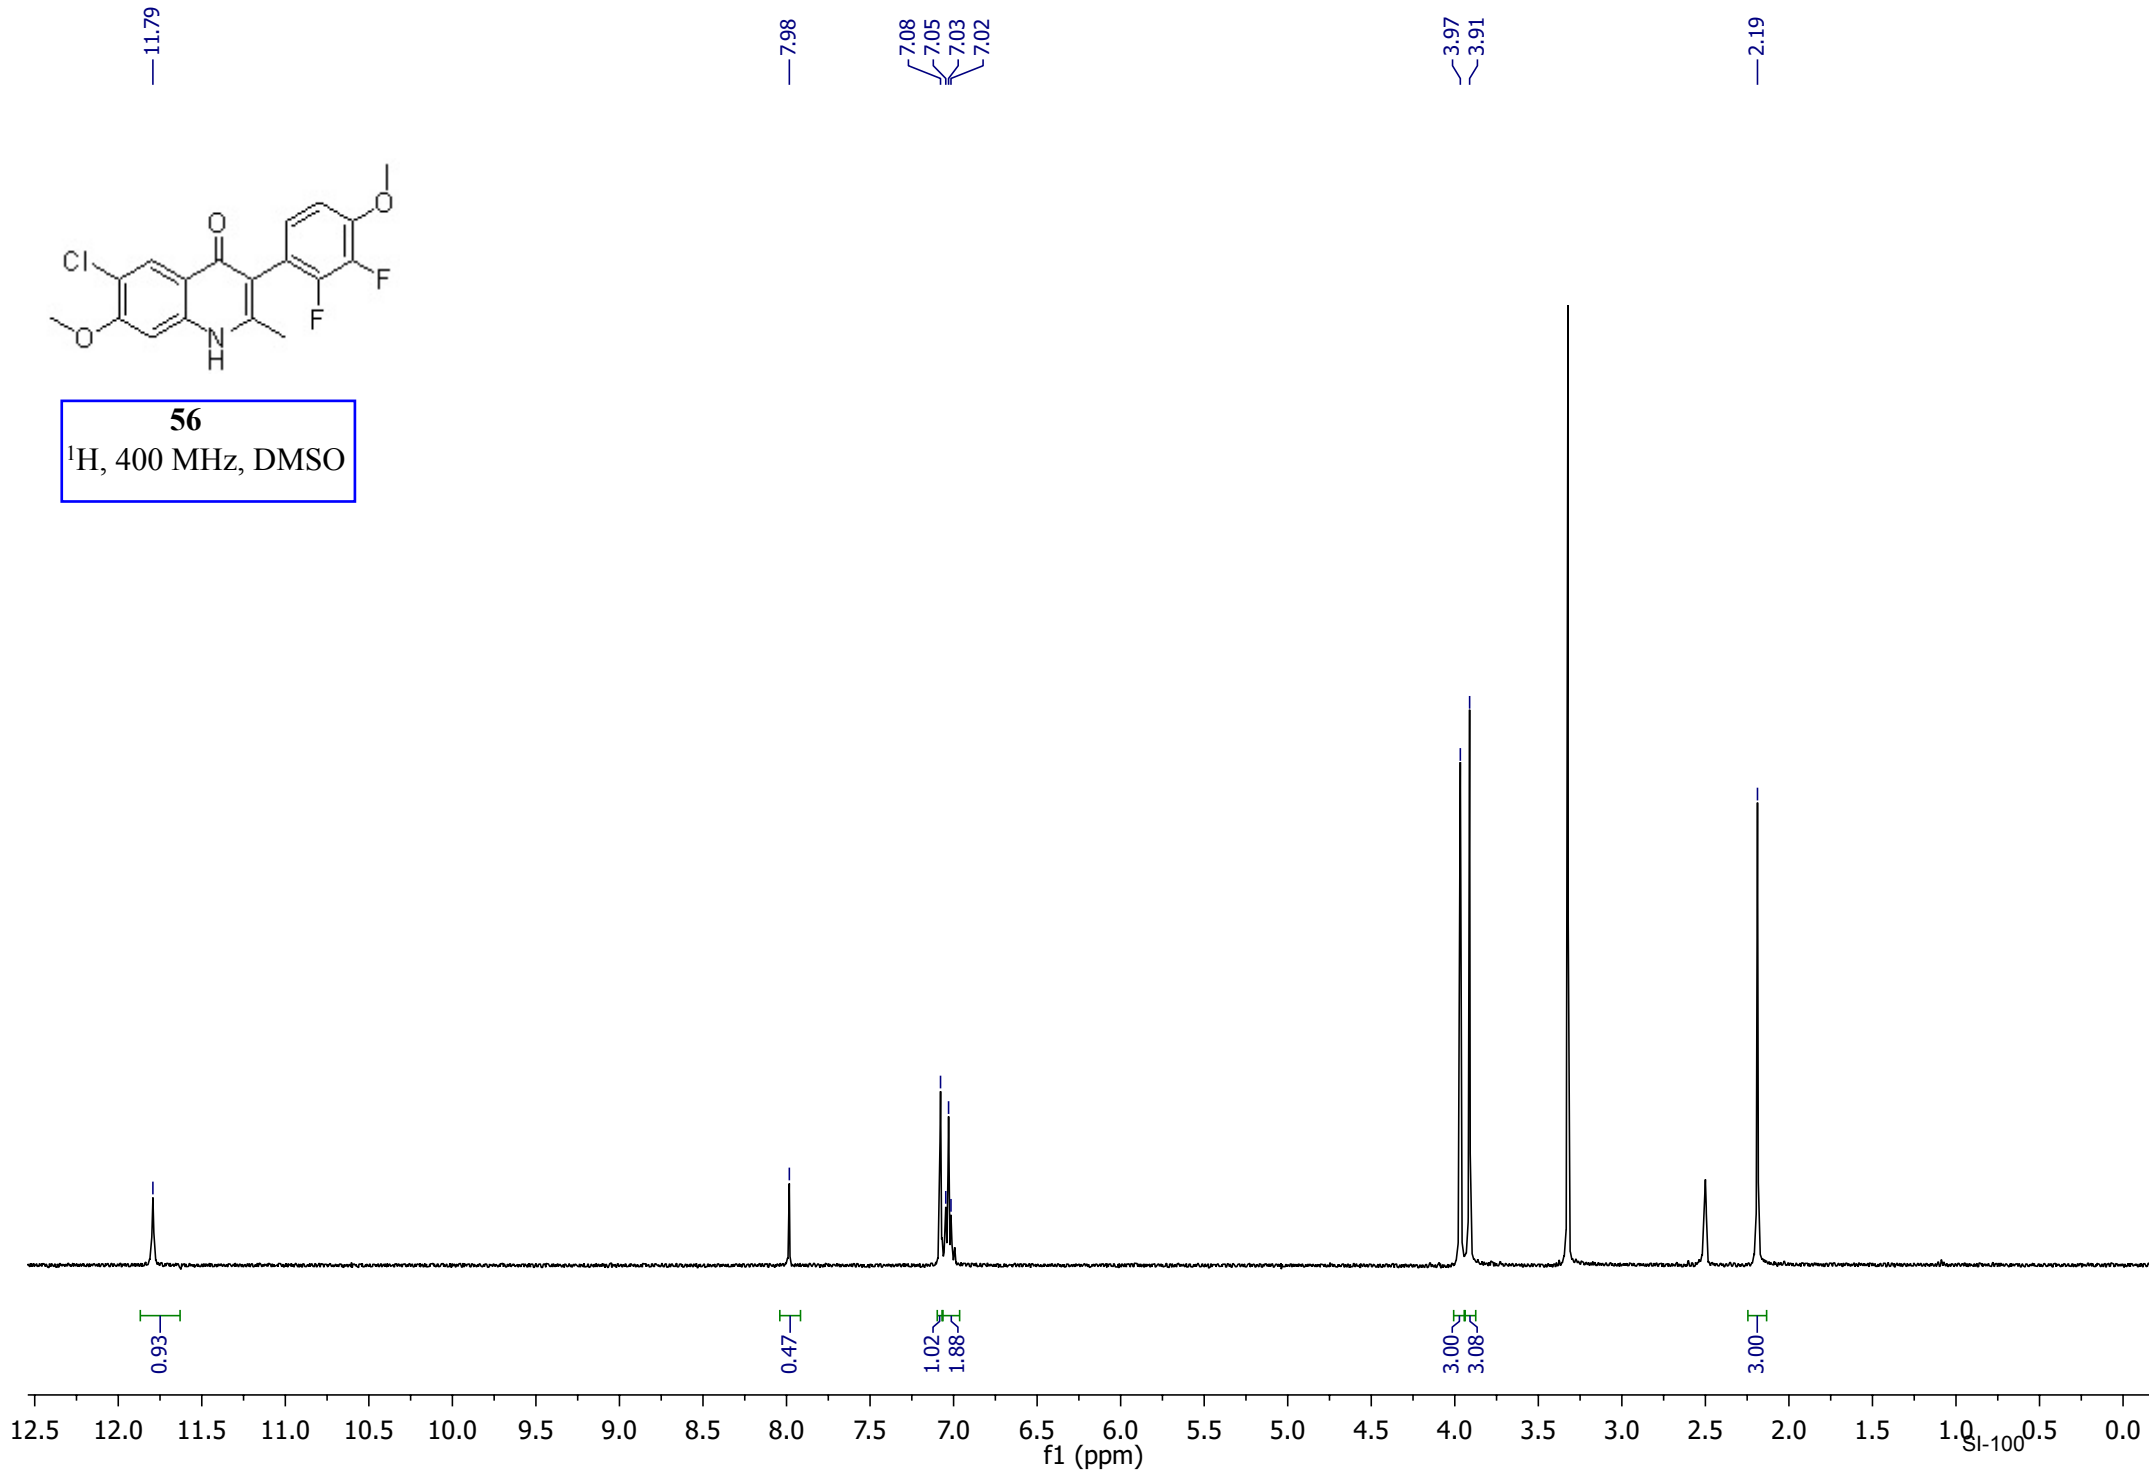



**56**

$^{13}\text{C}$ , 101 MHz, DMSO

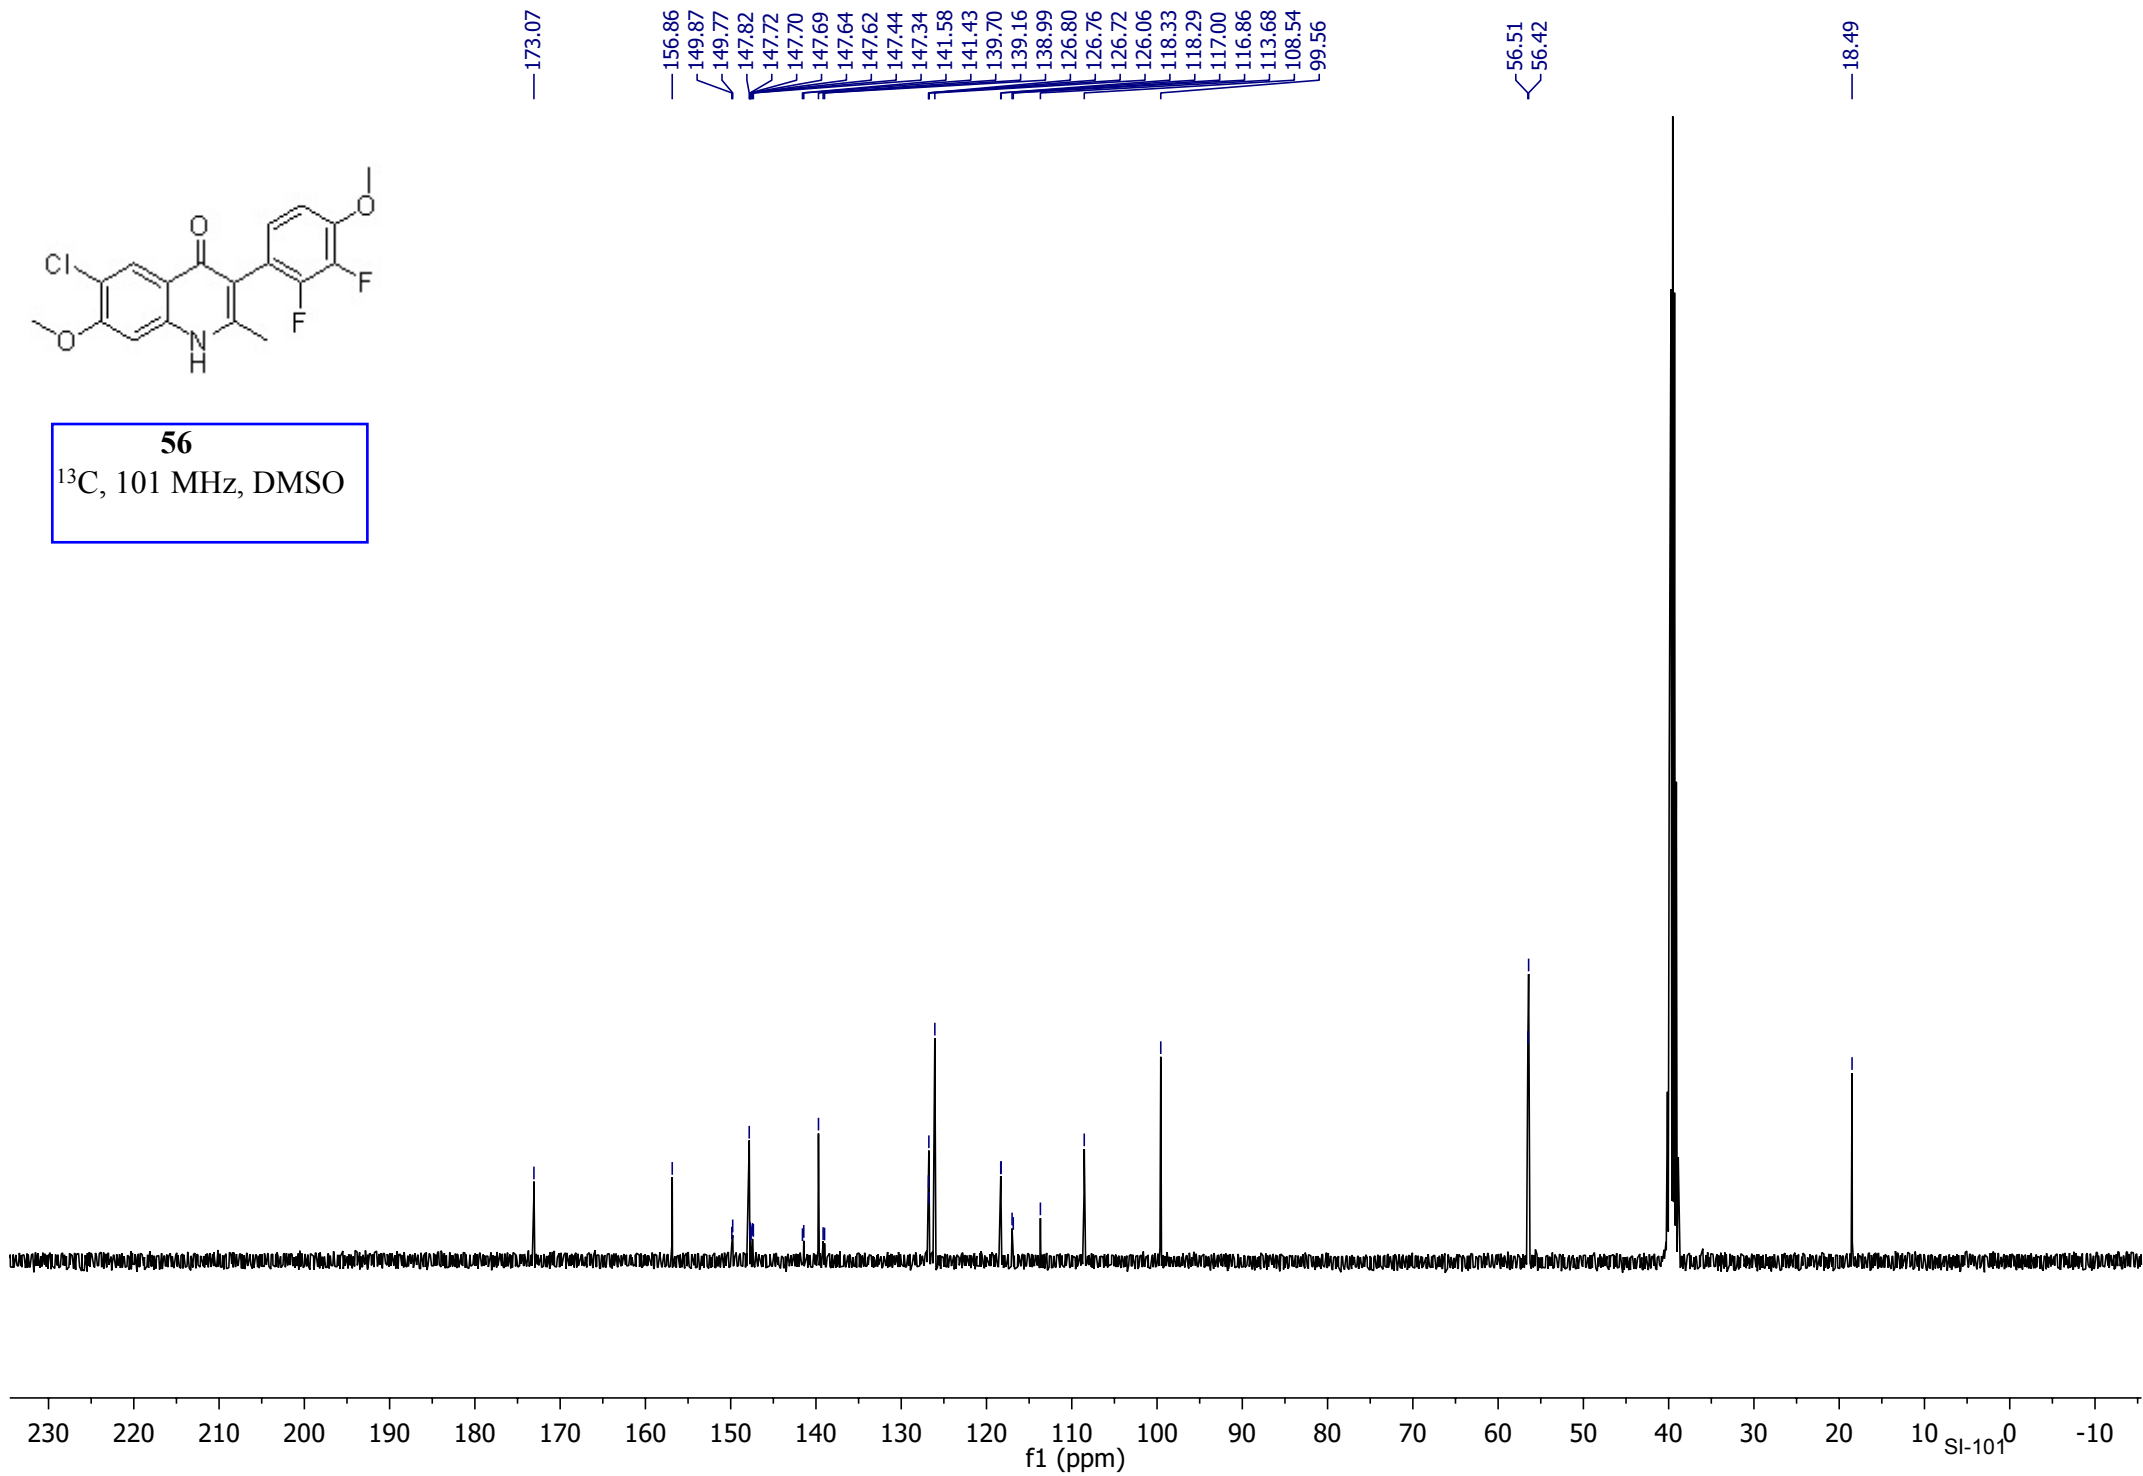

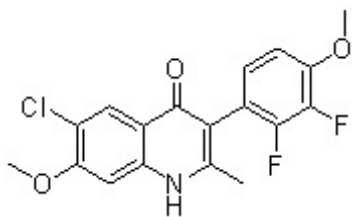

**56**

<sup>19</sup>F, 376 MHz, DMSO

— -137.32

— -161.39

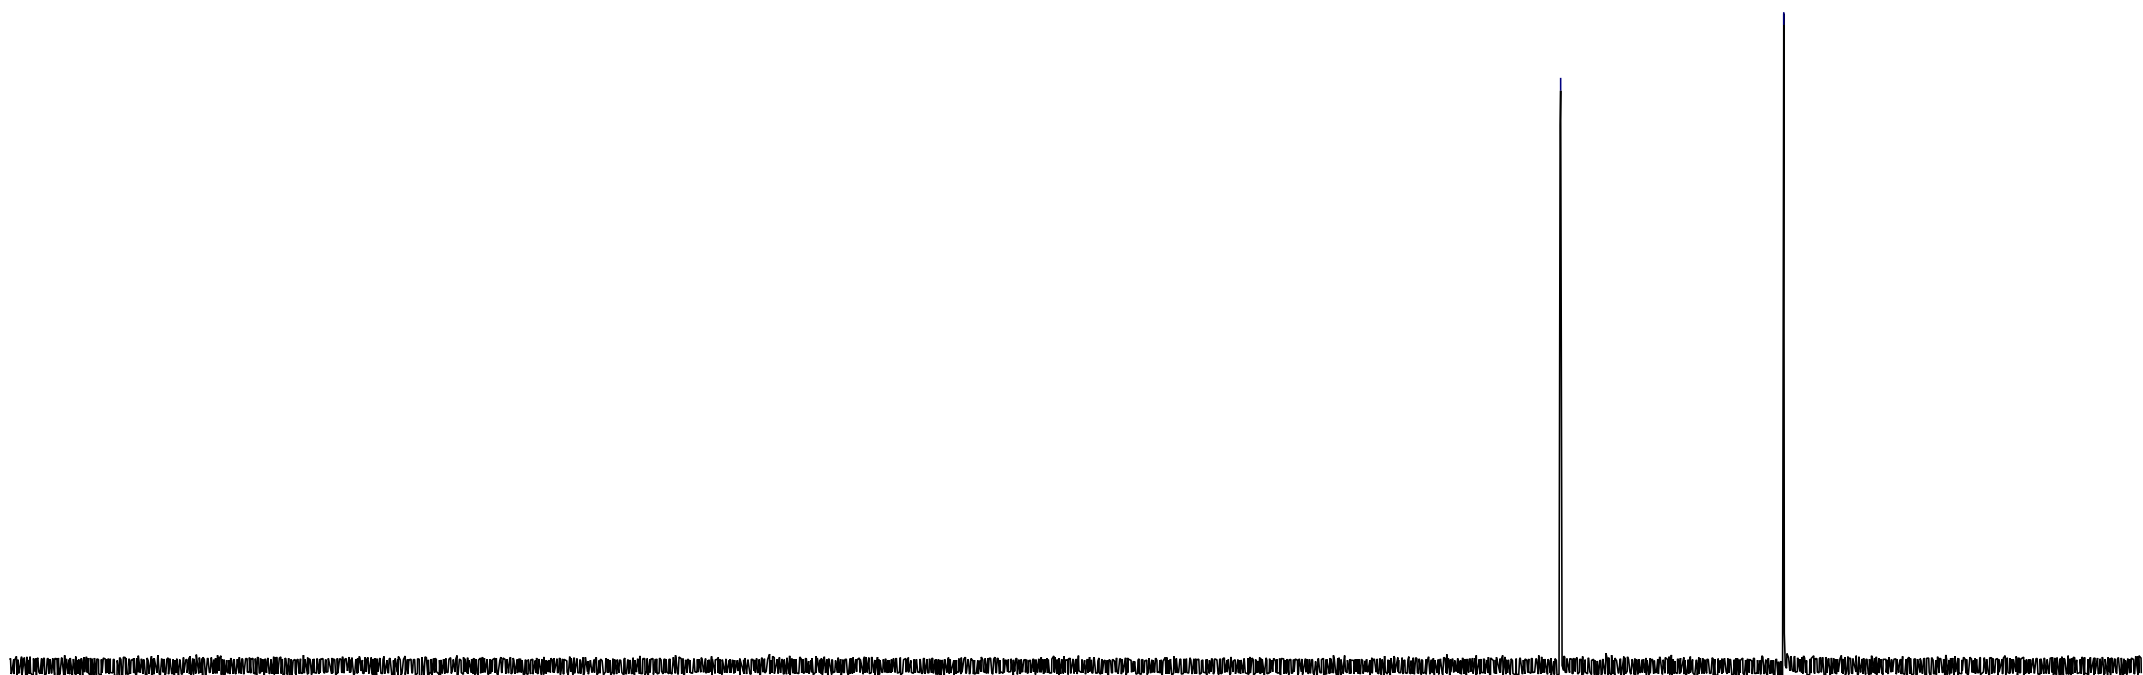

20 10 0 -10 -20 -30 -40 -50 -60 -70 -80 -90 -100 -110 -120 -130 -140 -150 -160 -170 -180 -190  
f1 (ppm) St-102

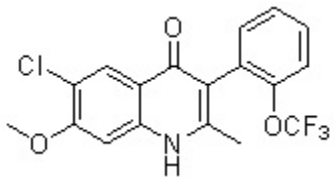

**57**

<sup>1</sup>H, 400 MHz, DMSO

11.82

7.99  
7.51  
7.49  
7.47  
7.45  
7.43  
7.40  
7.35  
7.34  
7.10

3.97

2.12

1.03

1.00

4.02

1.07

1.17

3.15

3.01

SI-103

f1 (ppm)



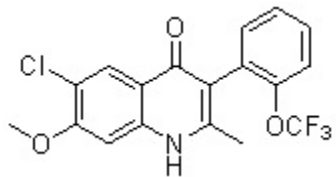

**57**  
<sup>13</sup>C, 101 MHz, DMSO

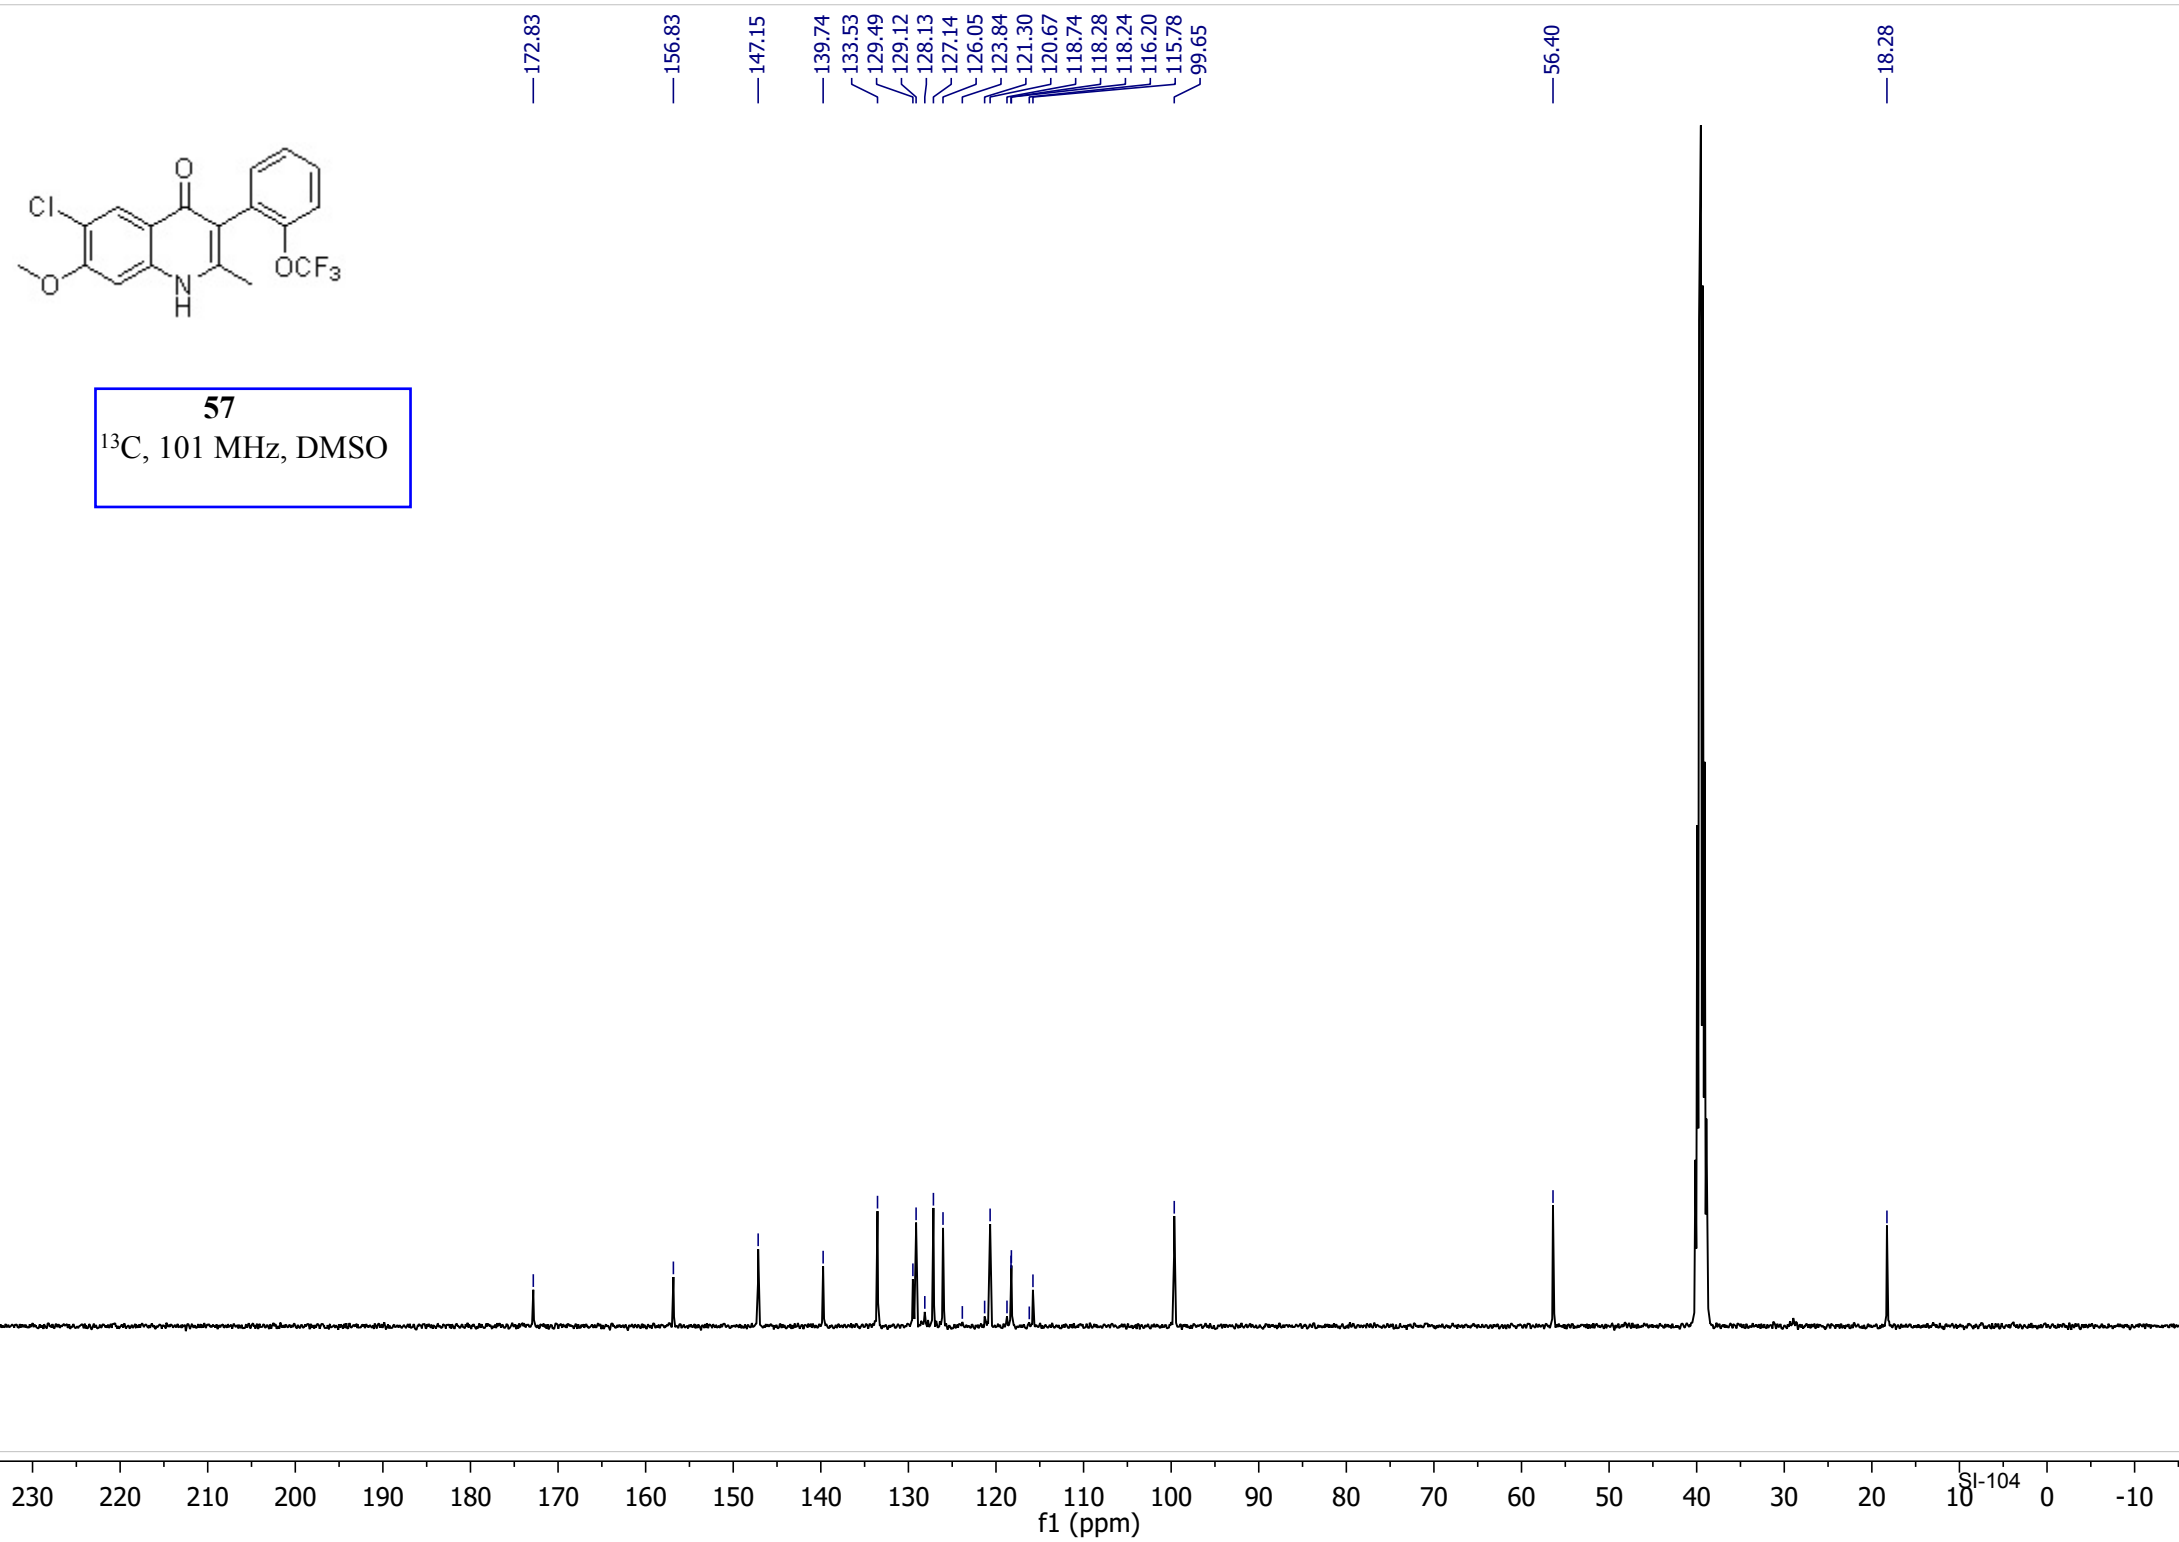



**57**

$^{19}\text{F}$ , 376 MHz, DMSO

—56.14

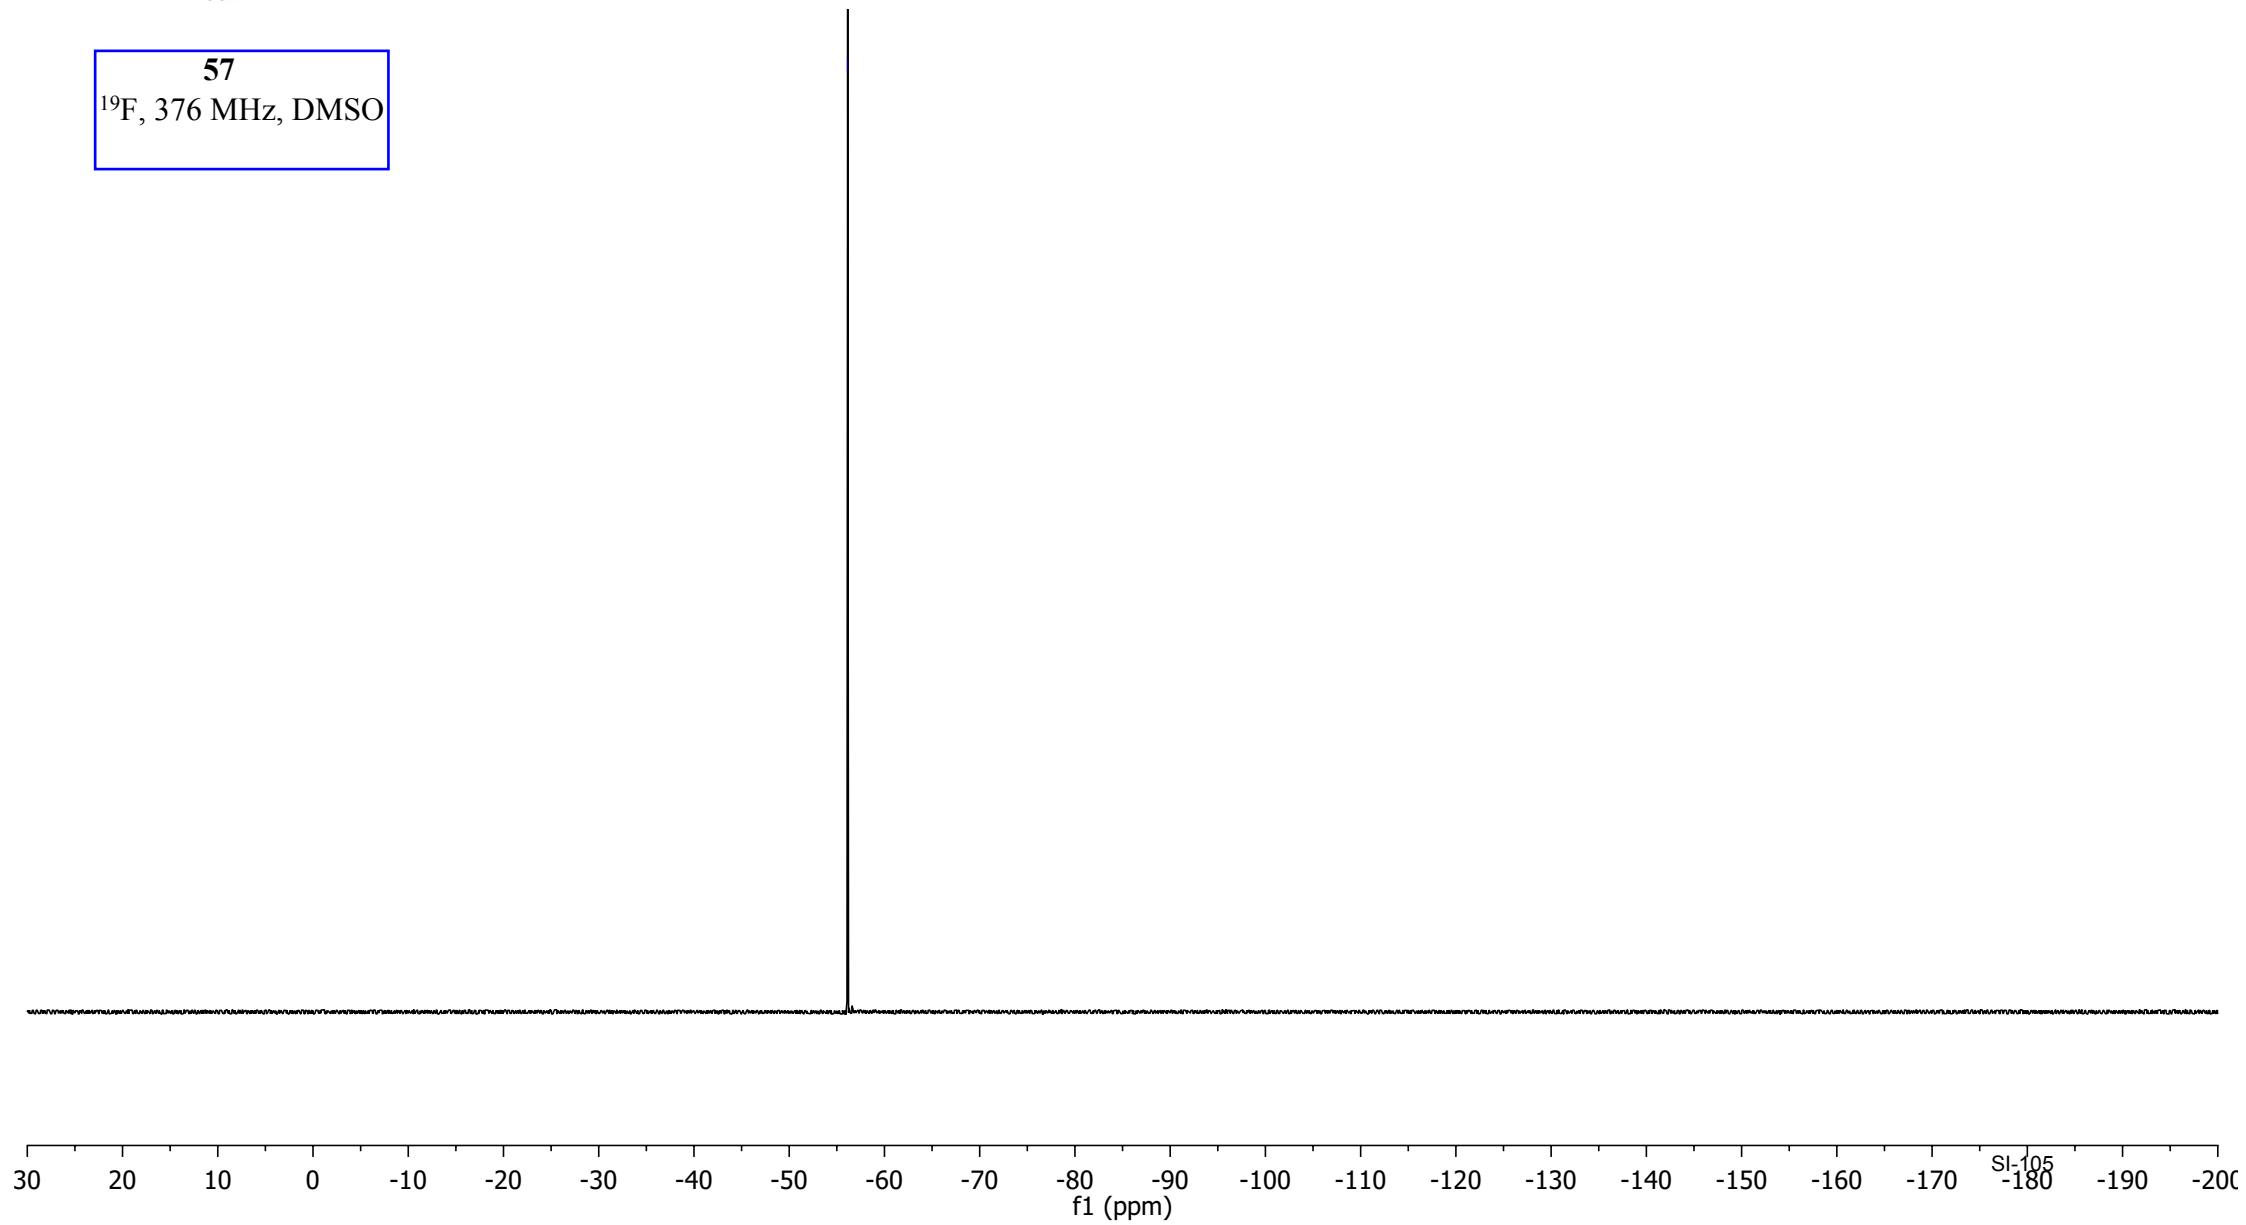

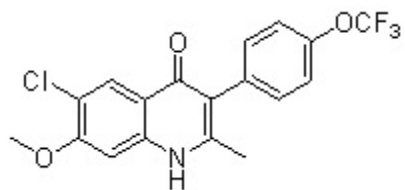

**58**

<sup>1</sup>H, 400 MHz, DMSO

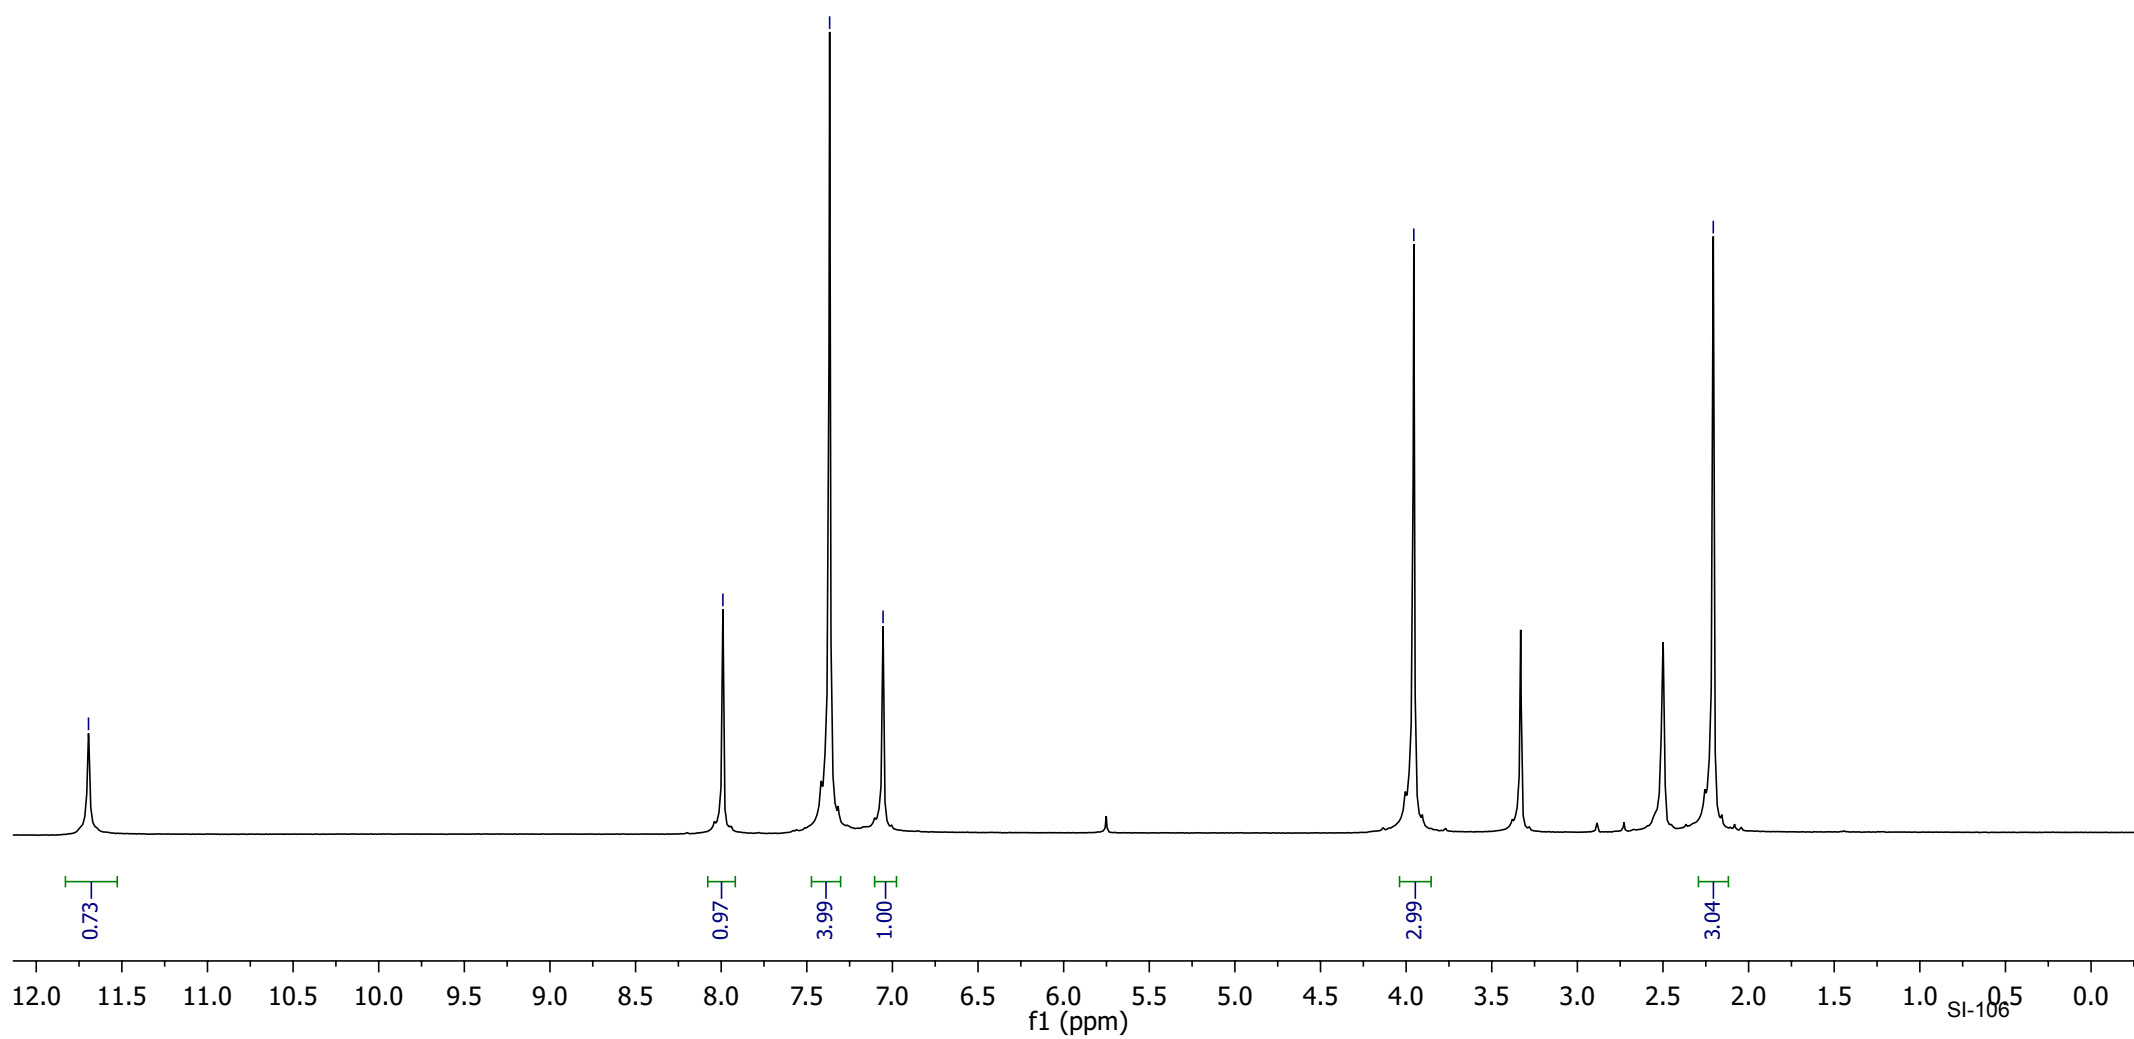

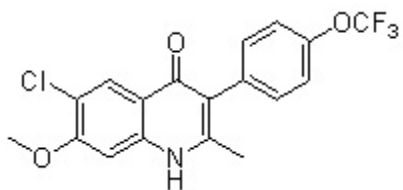

**58**  
 $^{13}\text{C}$ , 101 MHz, DMSO

—173.31

—156.75

146.97  
146.71

139.57  
135.15  
132.83

126.10  
120.30  
119.29  
118.65  
118.12

—99.43

—56.37

—18.83

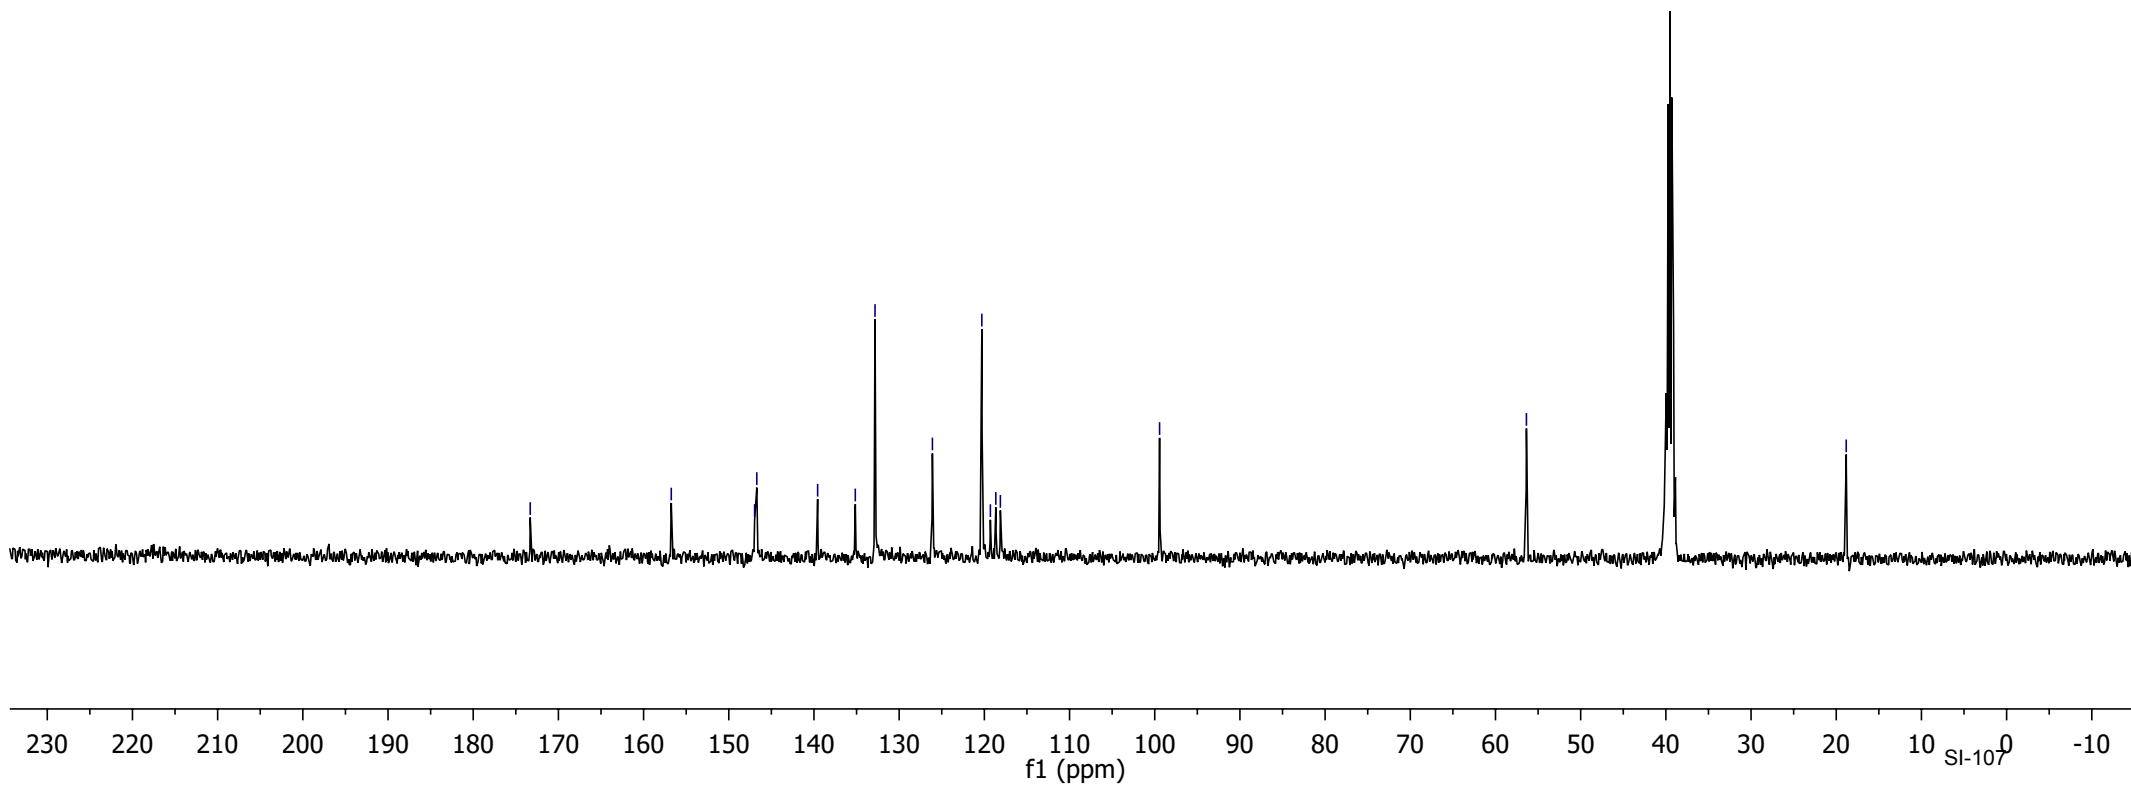

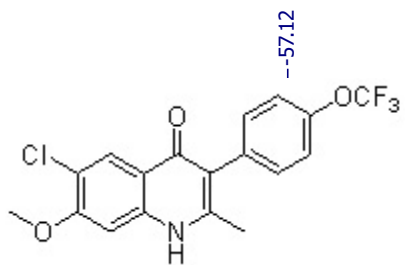

**58**  
 $^{19}\text{F}$ , 376 MHz, DMSO

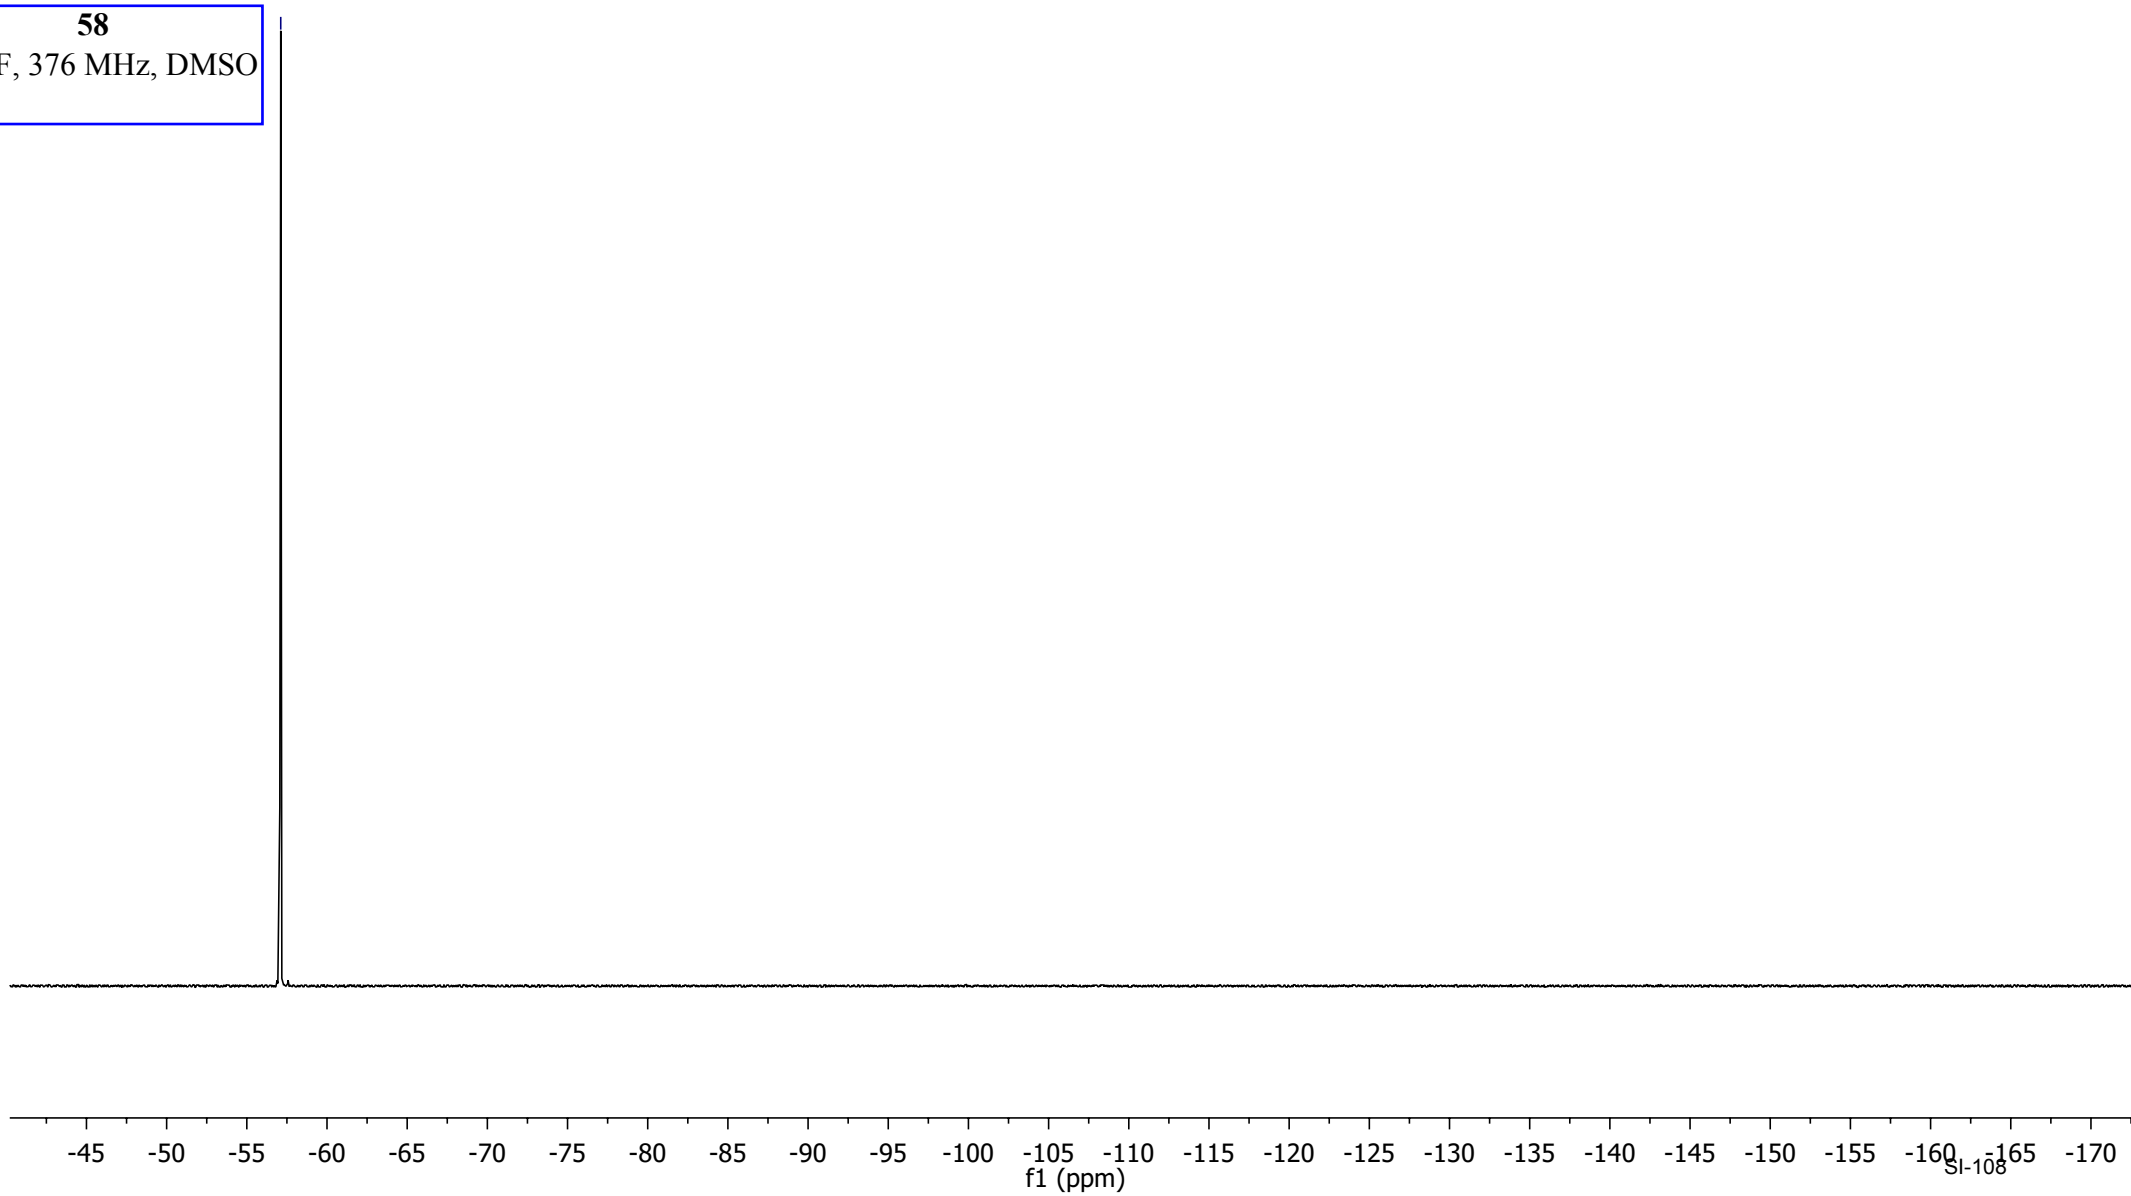

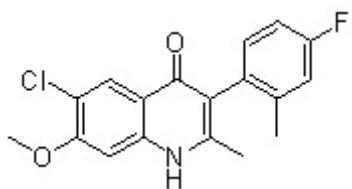

**59**

<sup>1</sup>H, 400 MHz, DMSO

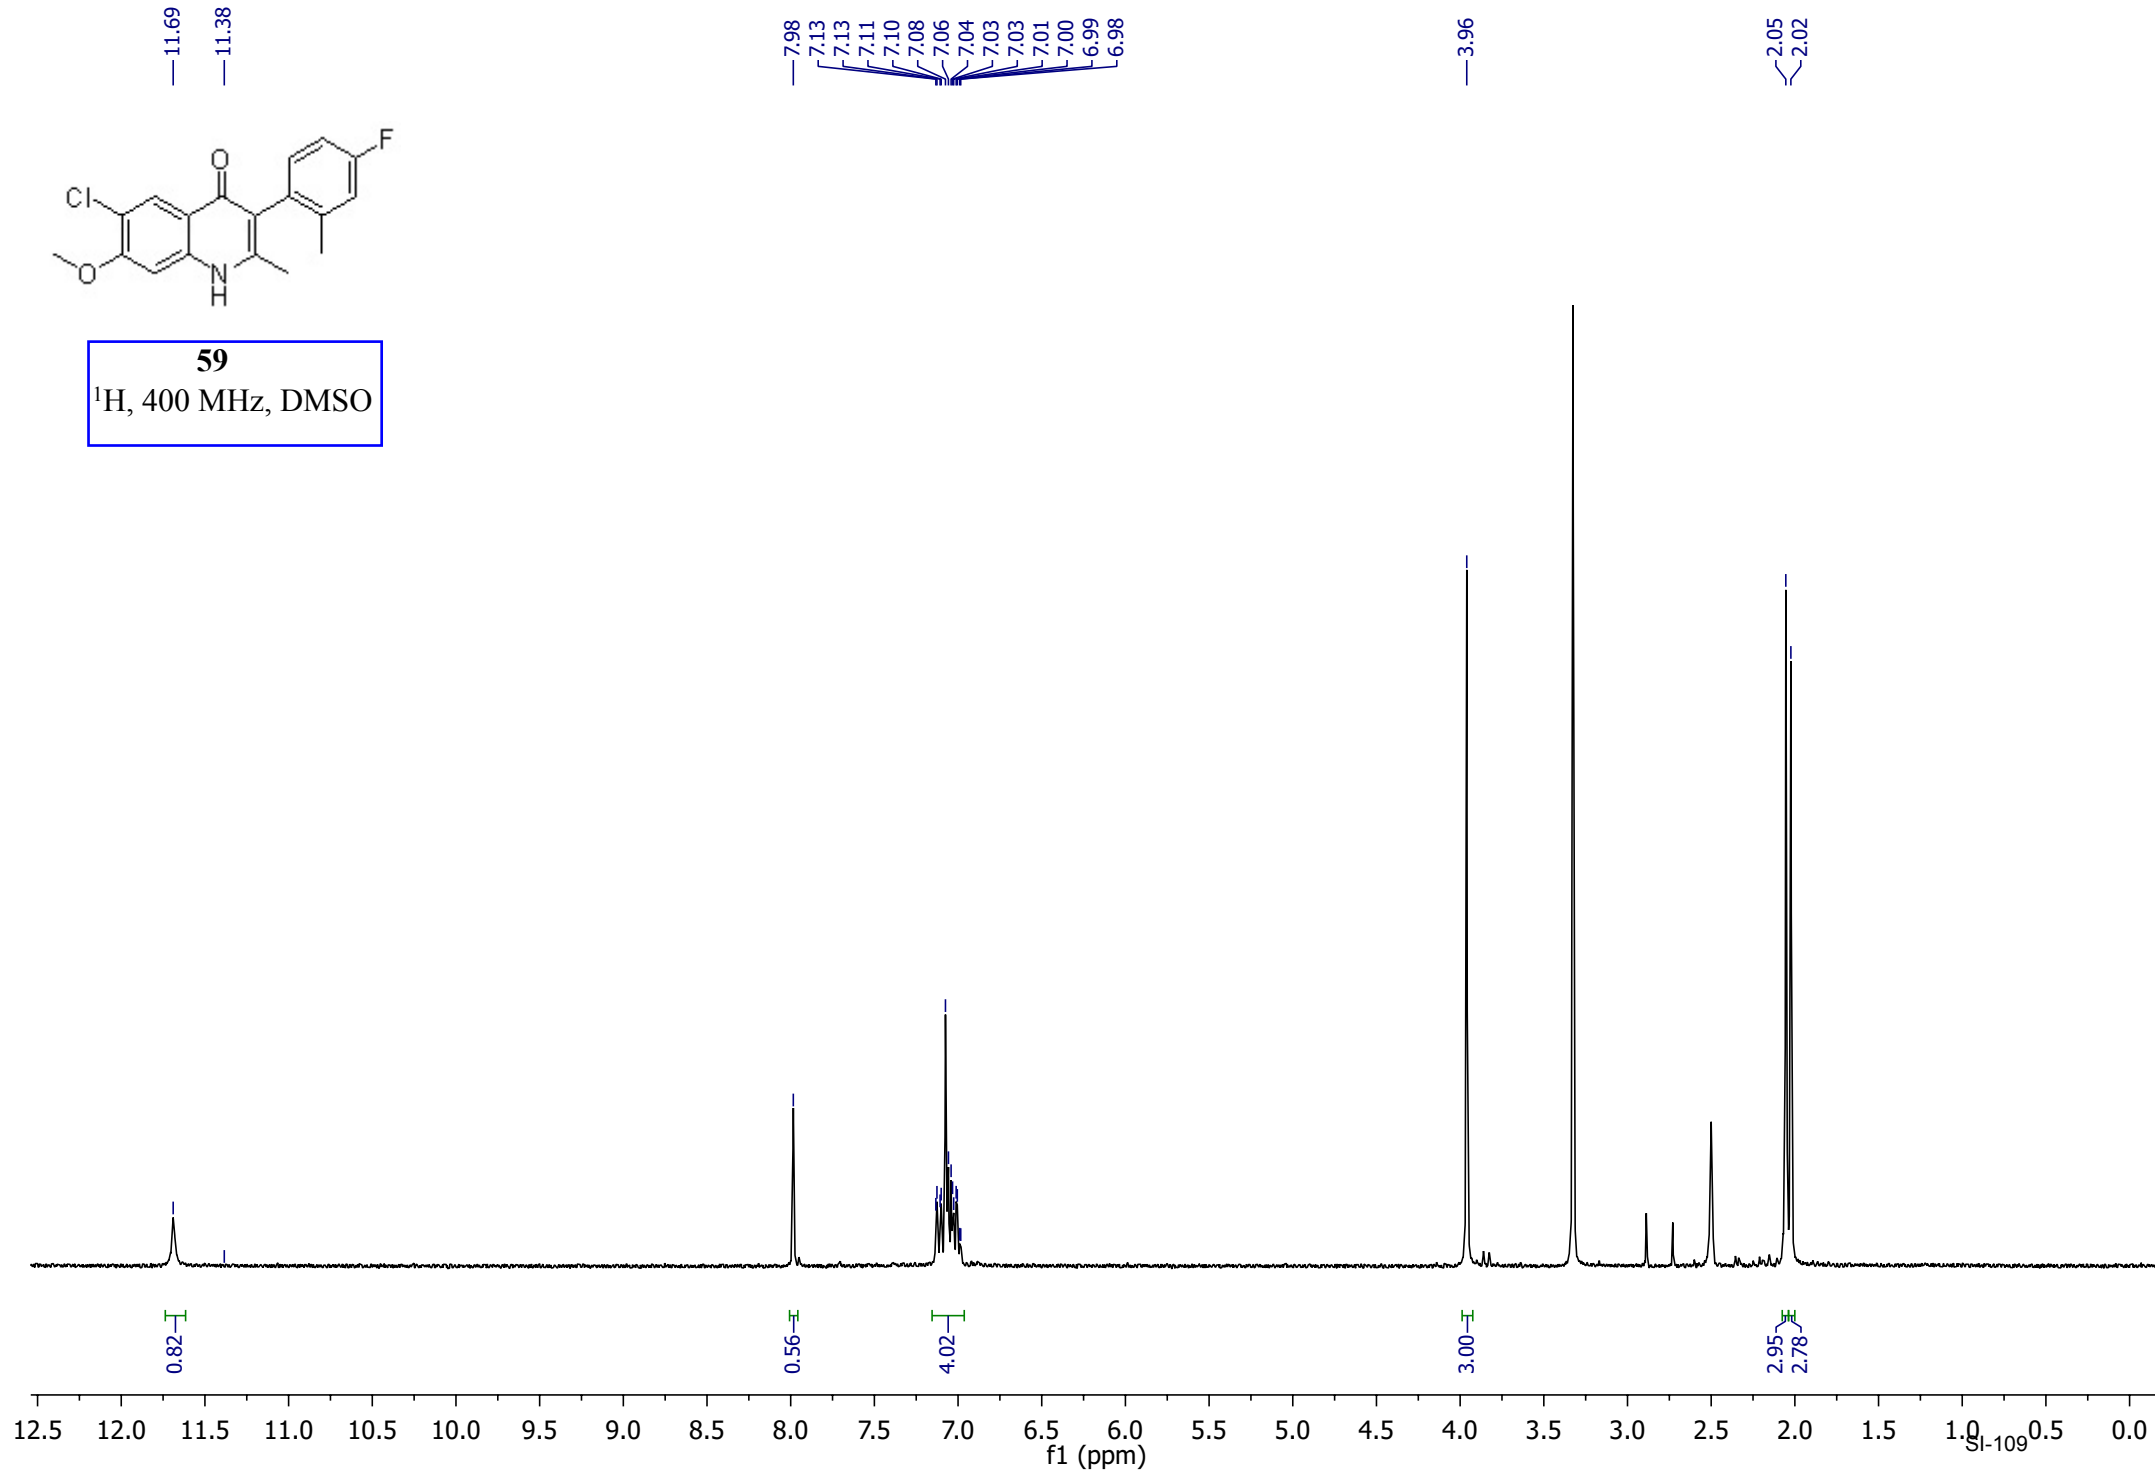



**59**  
<sup>13</sup>C, 101 MHz, DMSO

- 173.19
- 162.47
- 160.06
- 156.67
- 146.88
- 140.30
- 140.22
- 139.73
- 132.56
- 132.48
- 132.09
- 126.09
- 119.33
- 118.53
- 118.00
- 116.07
- 115.86
- 112.21
- 112.00
- 99.47

56.38

- 19.35
- 19.33
- 18.41

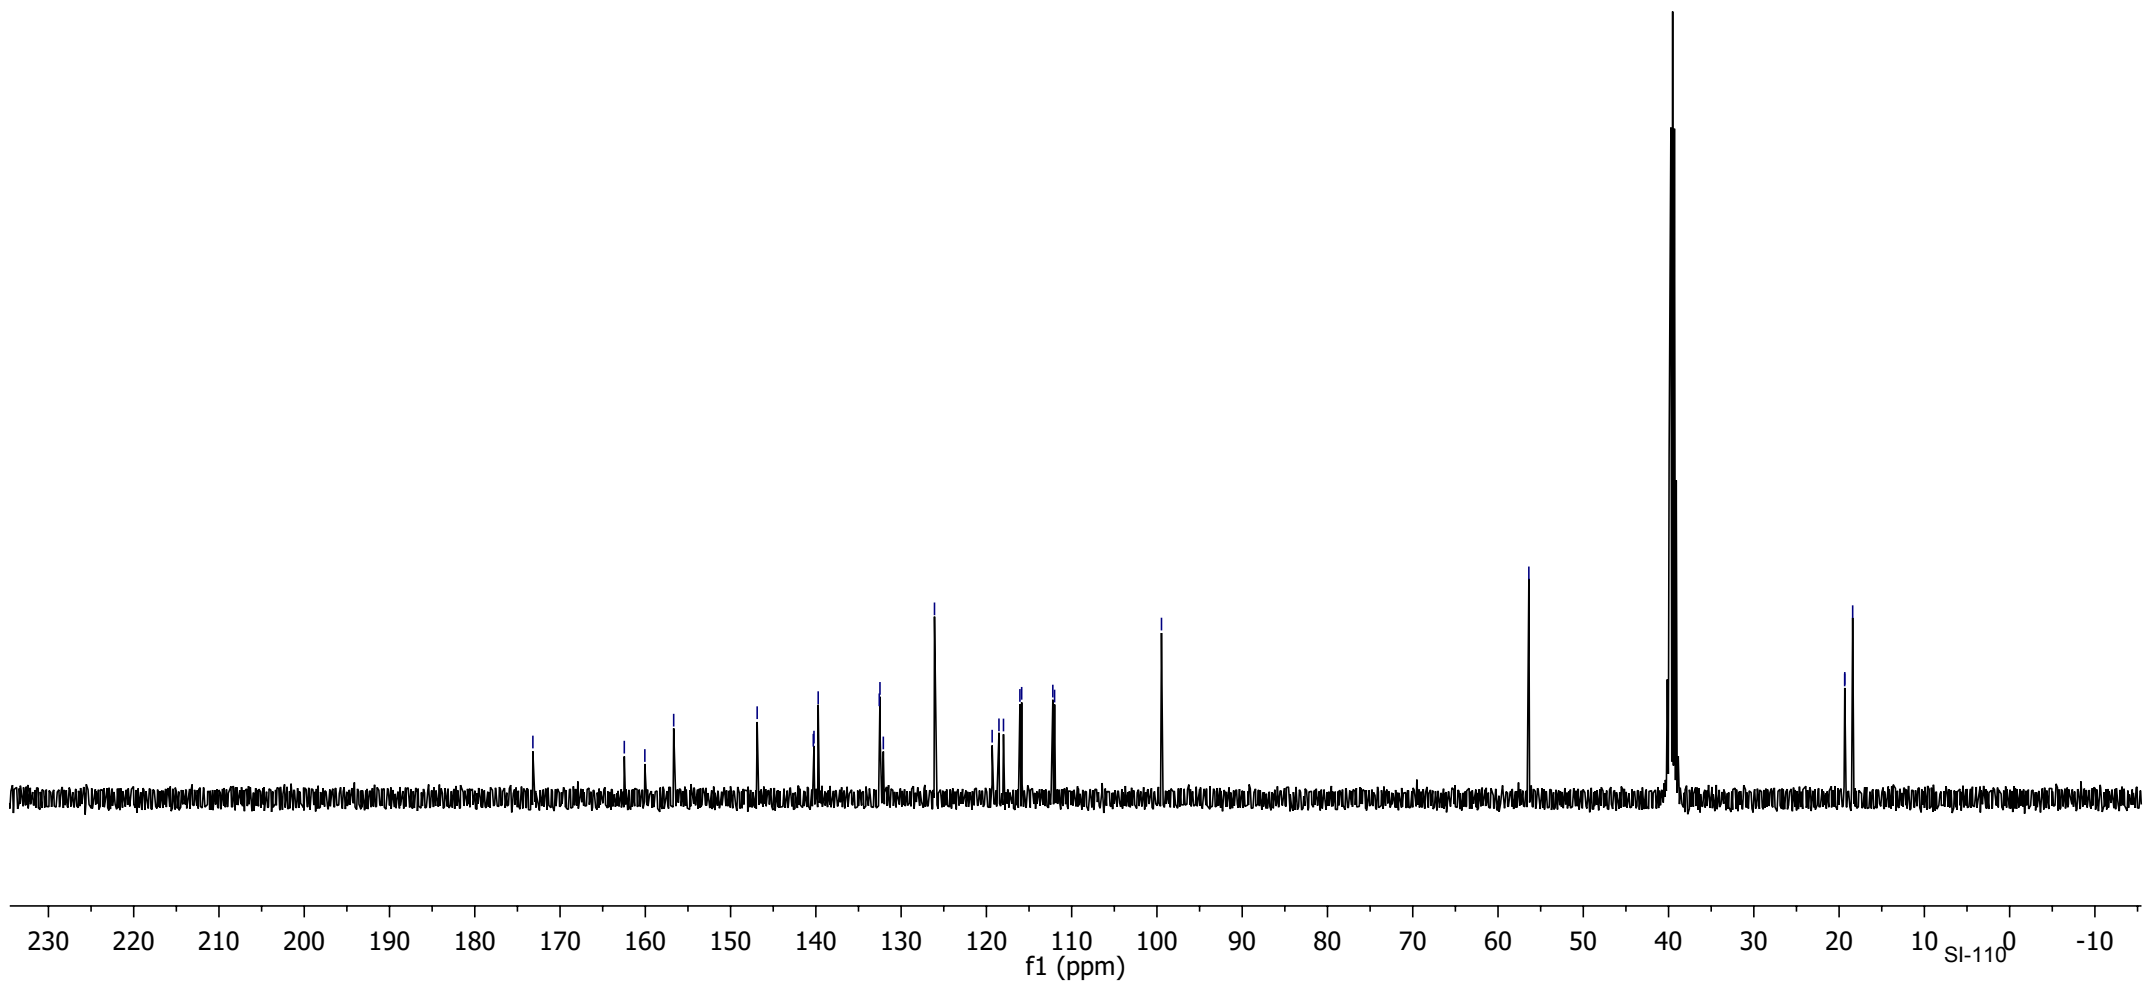



**59**

$^{19}\text{F}$ , 376 MHz, DMSO

— -116.47

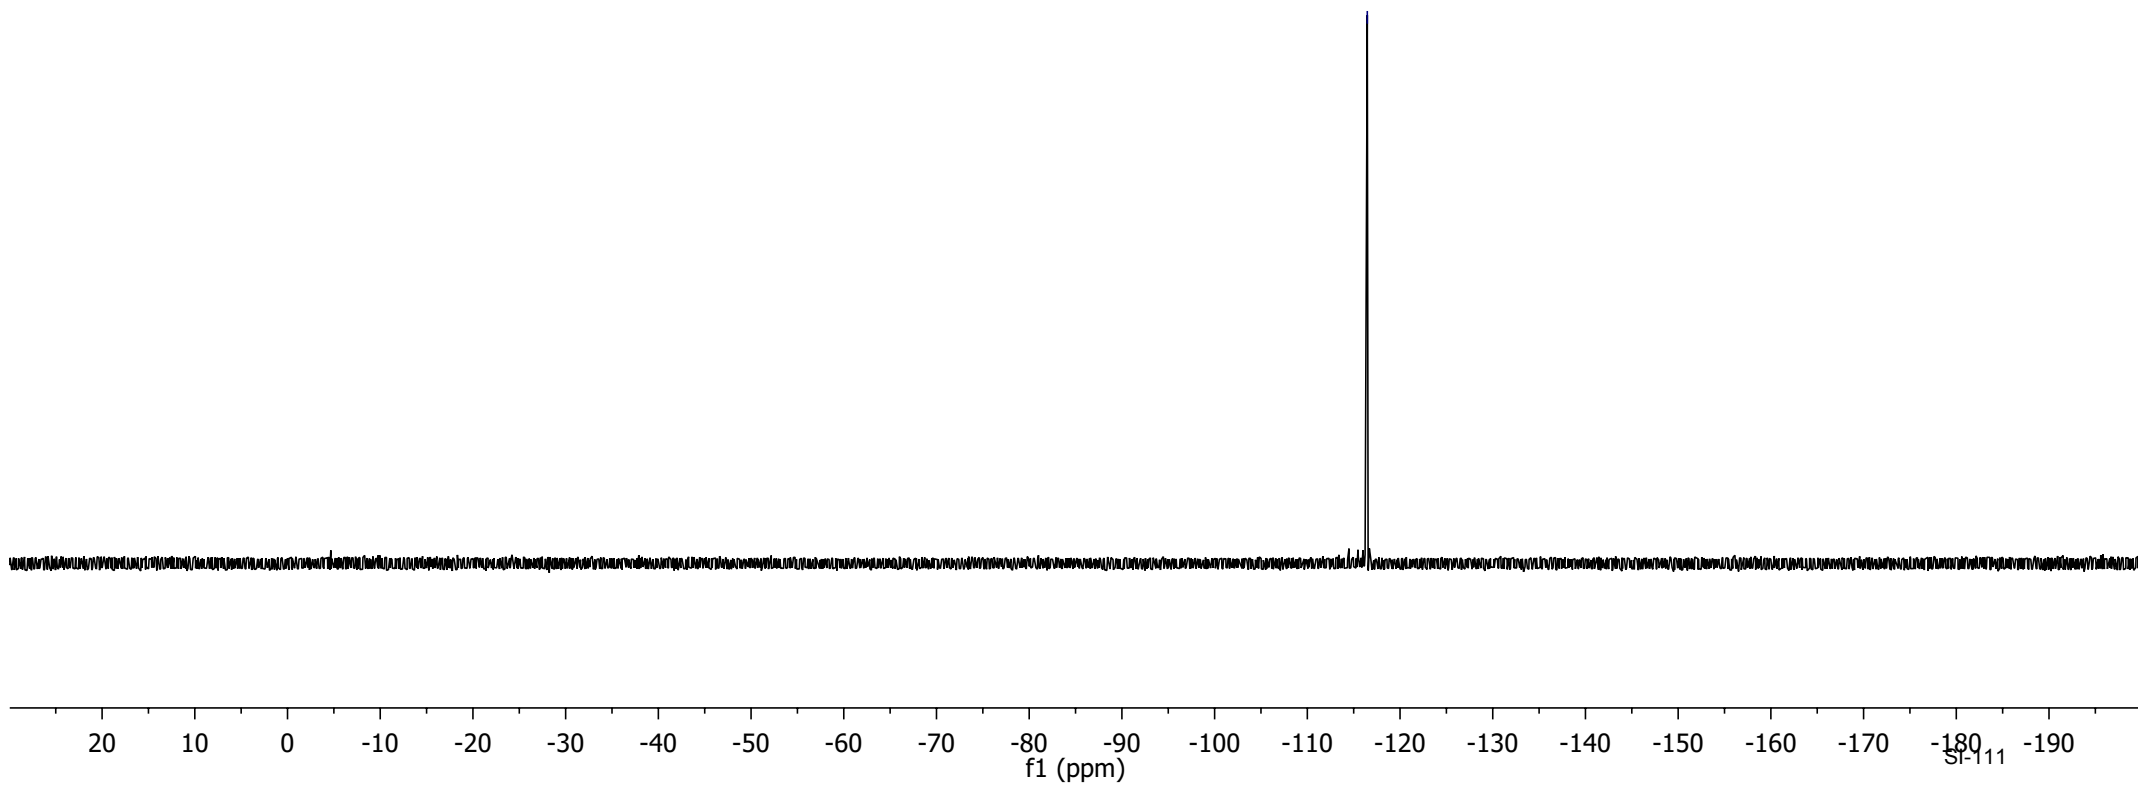



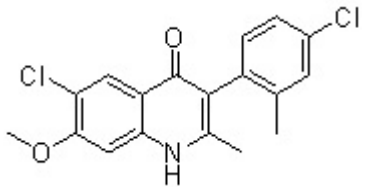

**60**  
<sup>1</sup>H, 400 MHz, DMSO

11.71

7.98

7.35

7.26

7.24

7.08

7.05

3.96

2.06

2.02

1.00

1.03

0.95

2.14

2.02

3.32

6.13

SI-112

f1 (ppm)

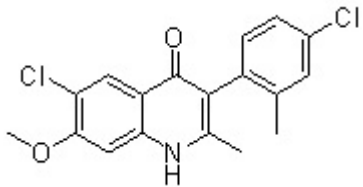

**60**  
<sup>13</sup>C, 101 MHz, DMSO

—173.71

—157.40

—147.46

140.82

140.42

135.62

133.30

132.18

129.84

126.76

126.09

119.83

119.19

118.75

—100.18

—57.08

19.80

19.08

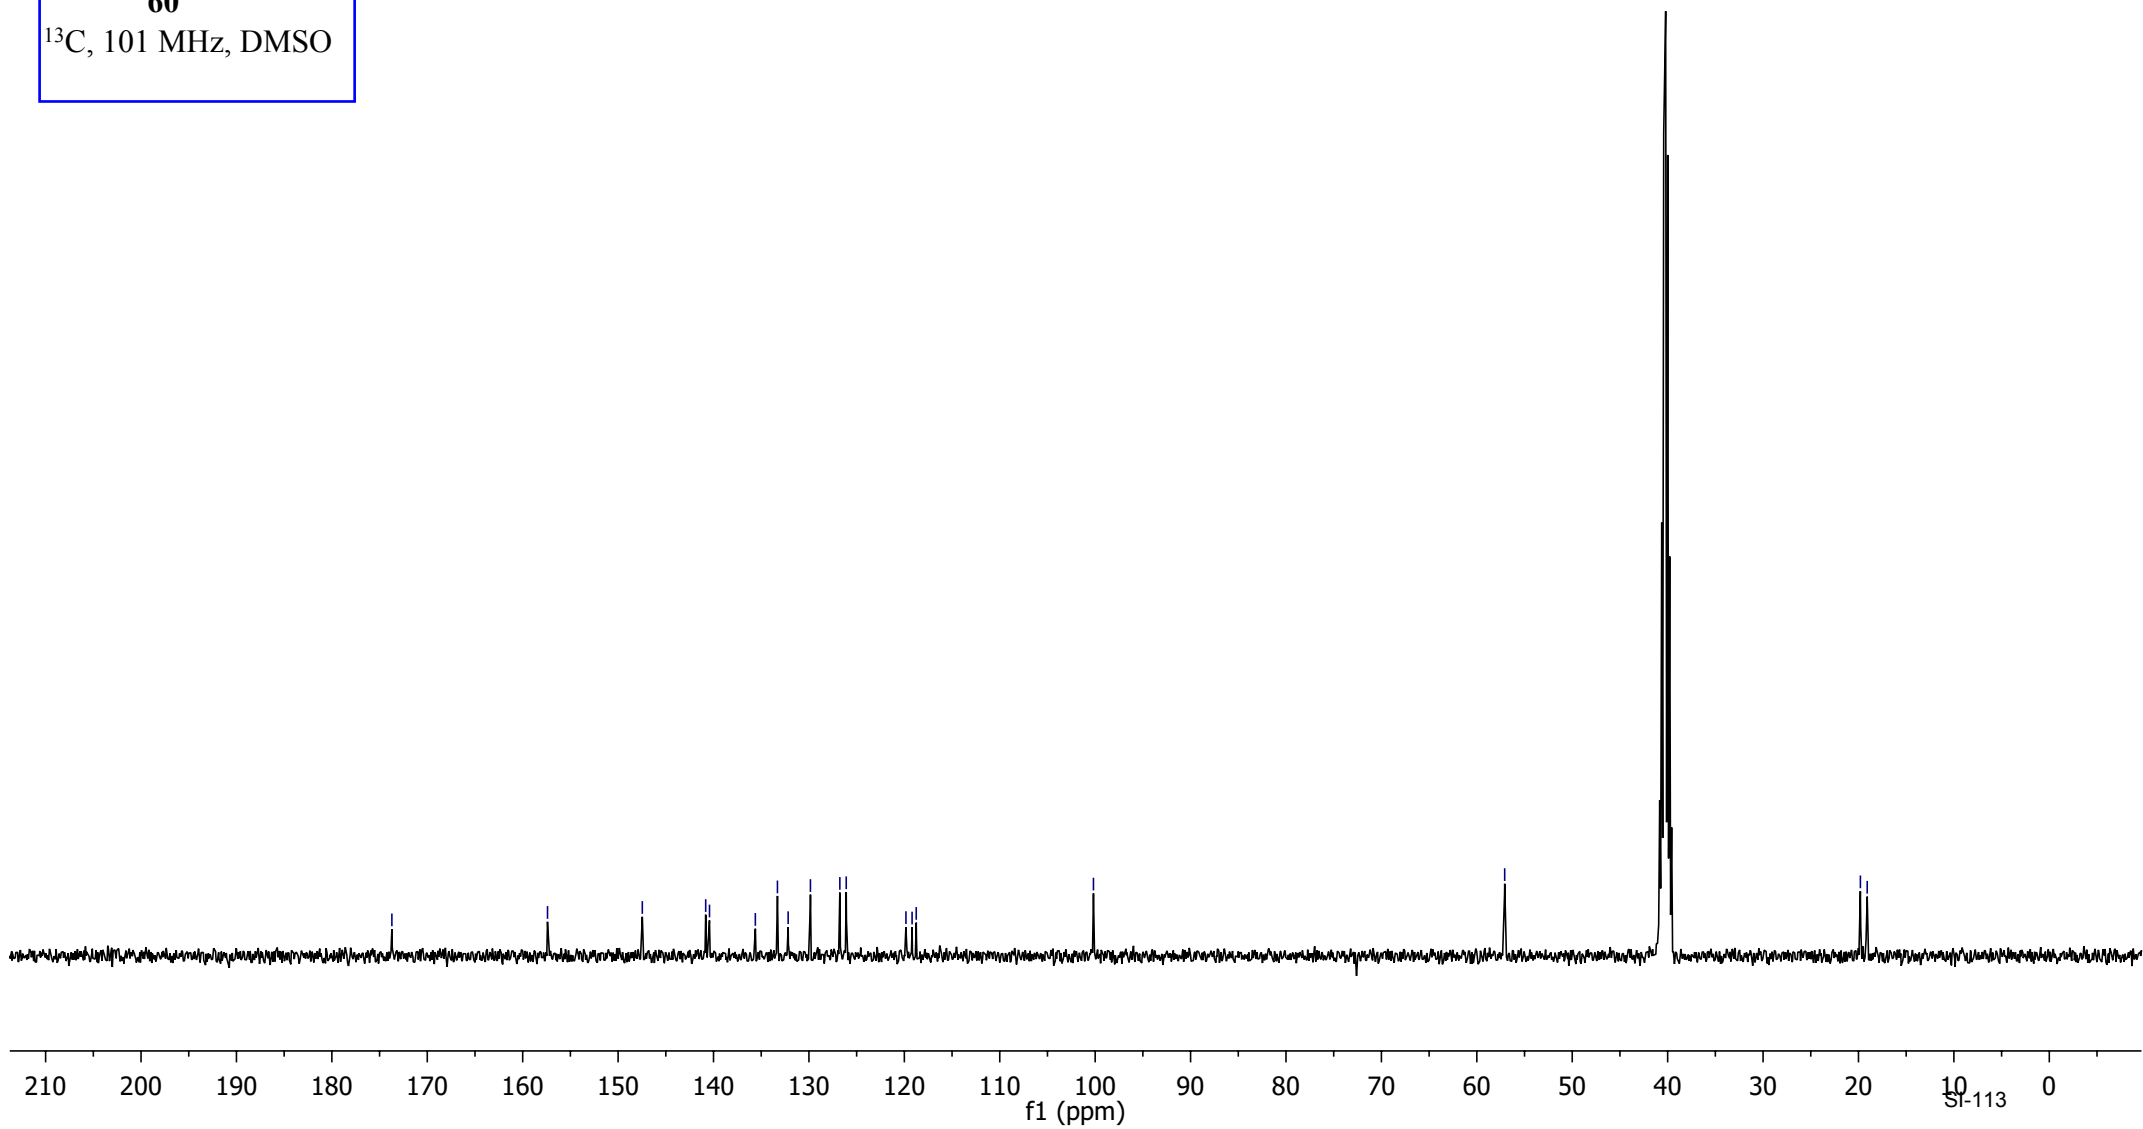

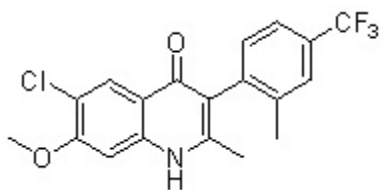

**61**  
<sup>1</sup>H, 400 MHz, DMSO

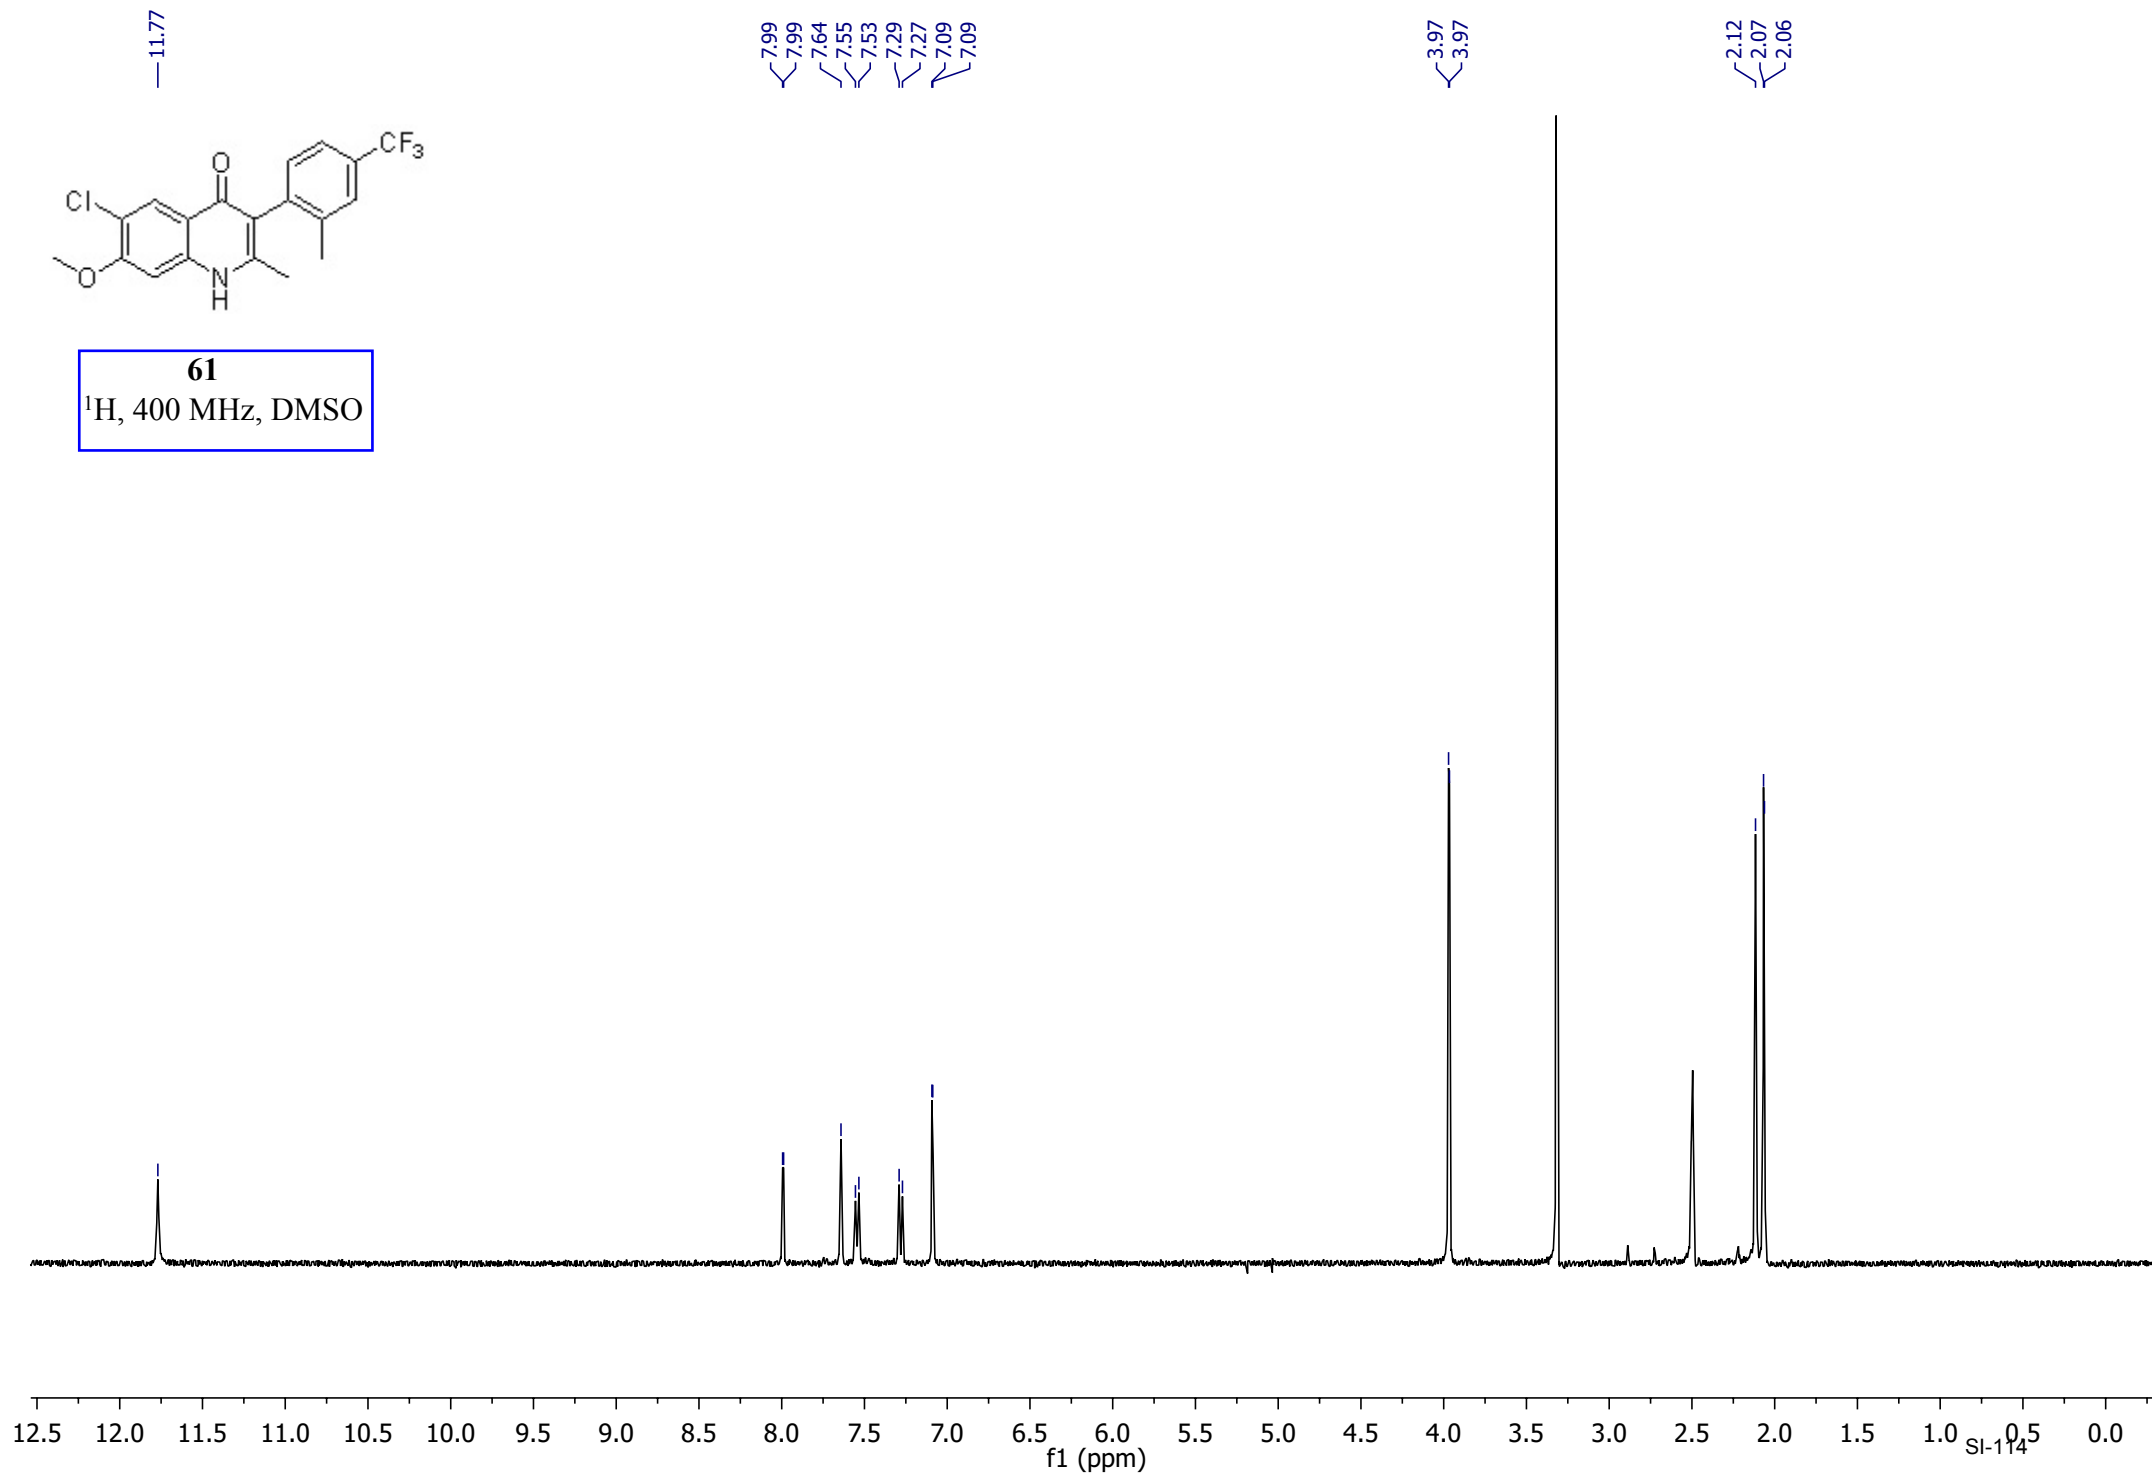



**61**  
 $^{13}\text{C}$ , 101 MHz, DMSO

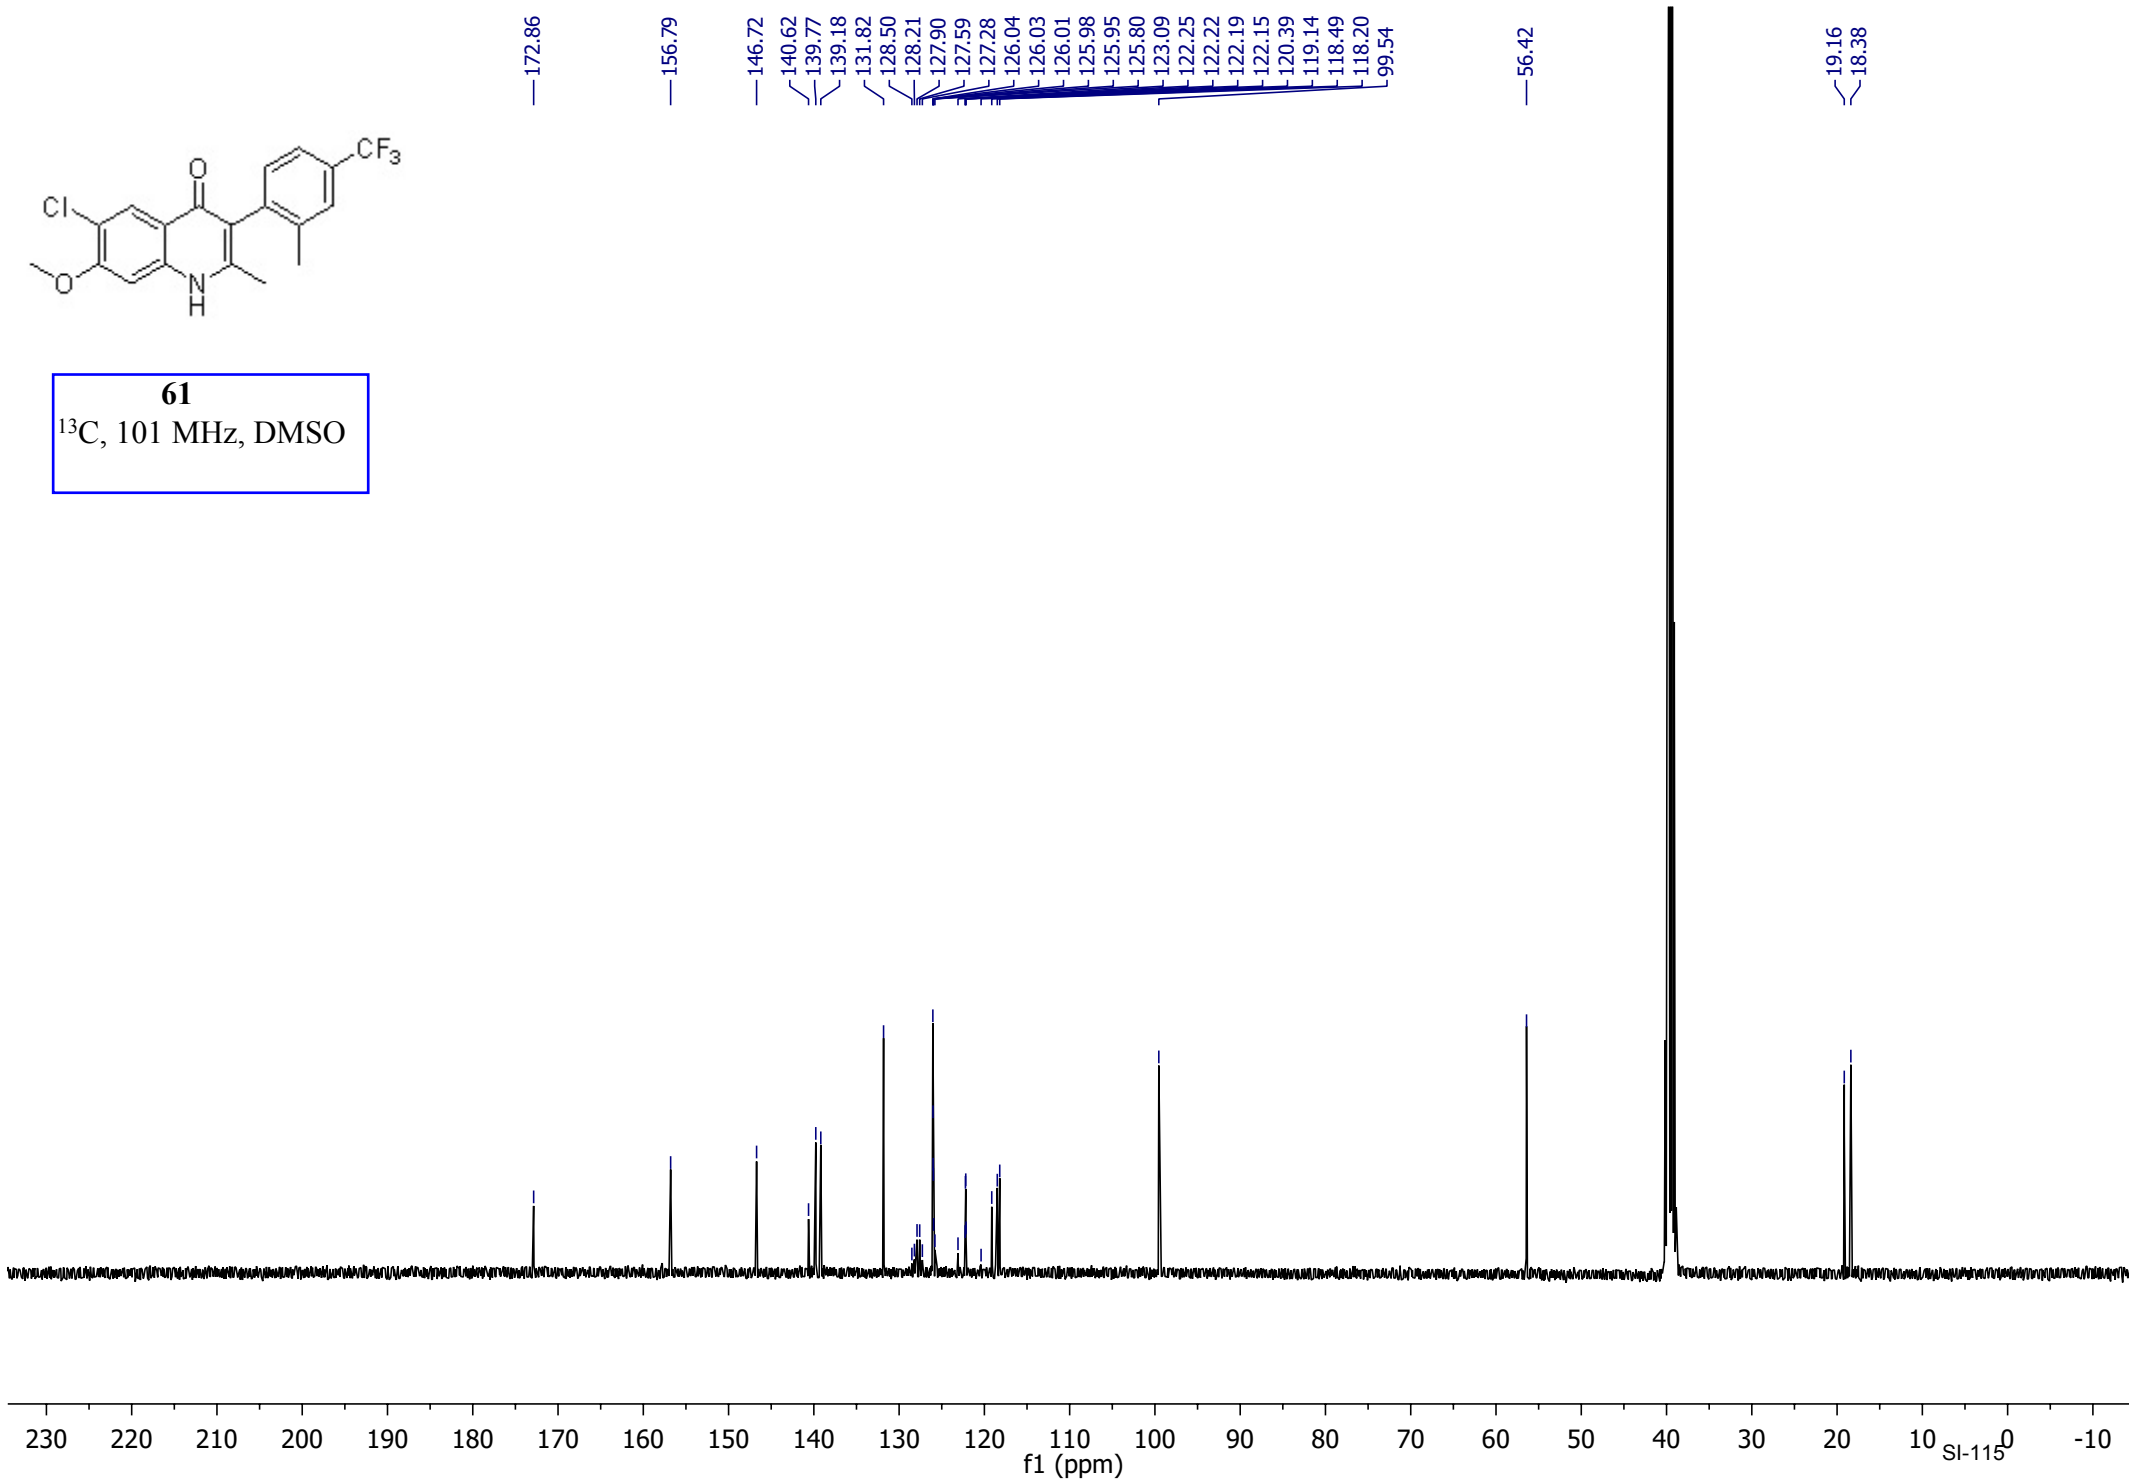

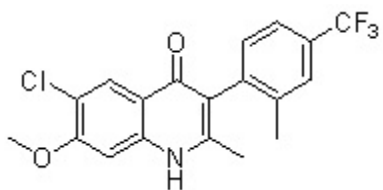

**61**

<sup>19</sup>F, 376 MHz, DMSO

—60.86

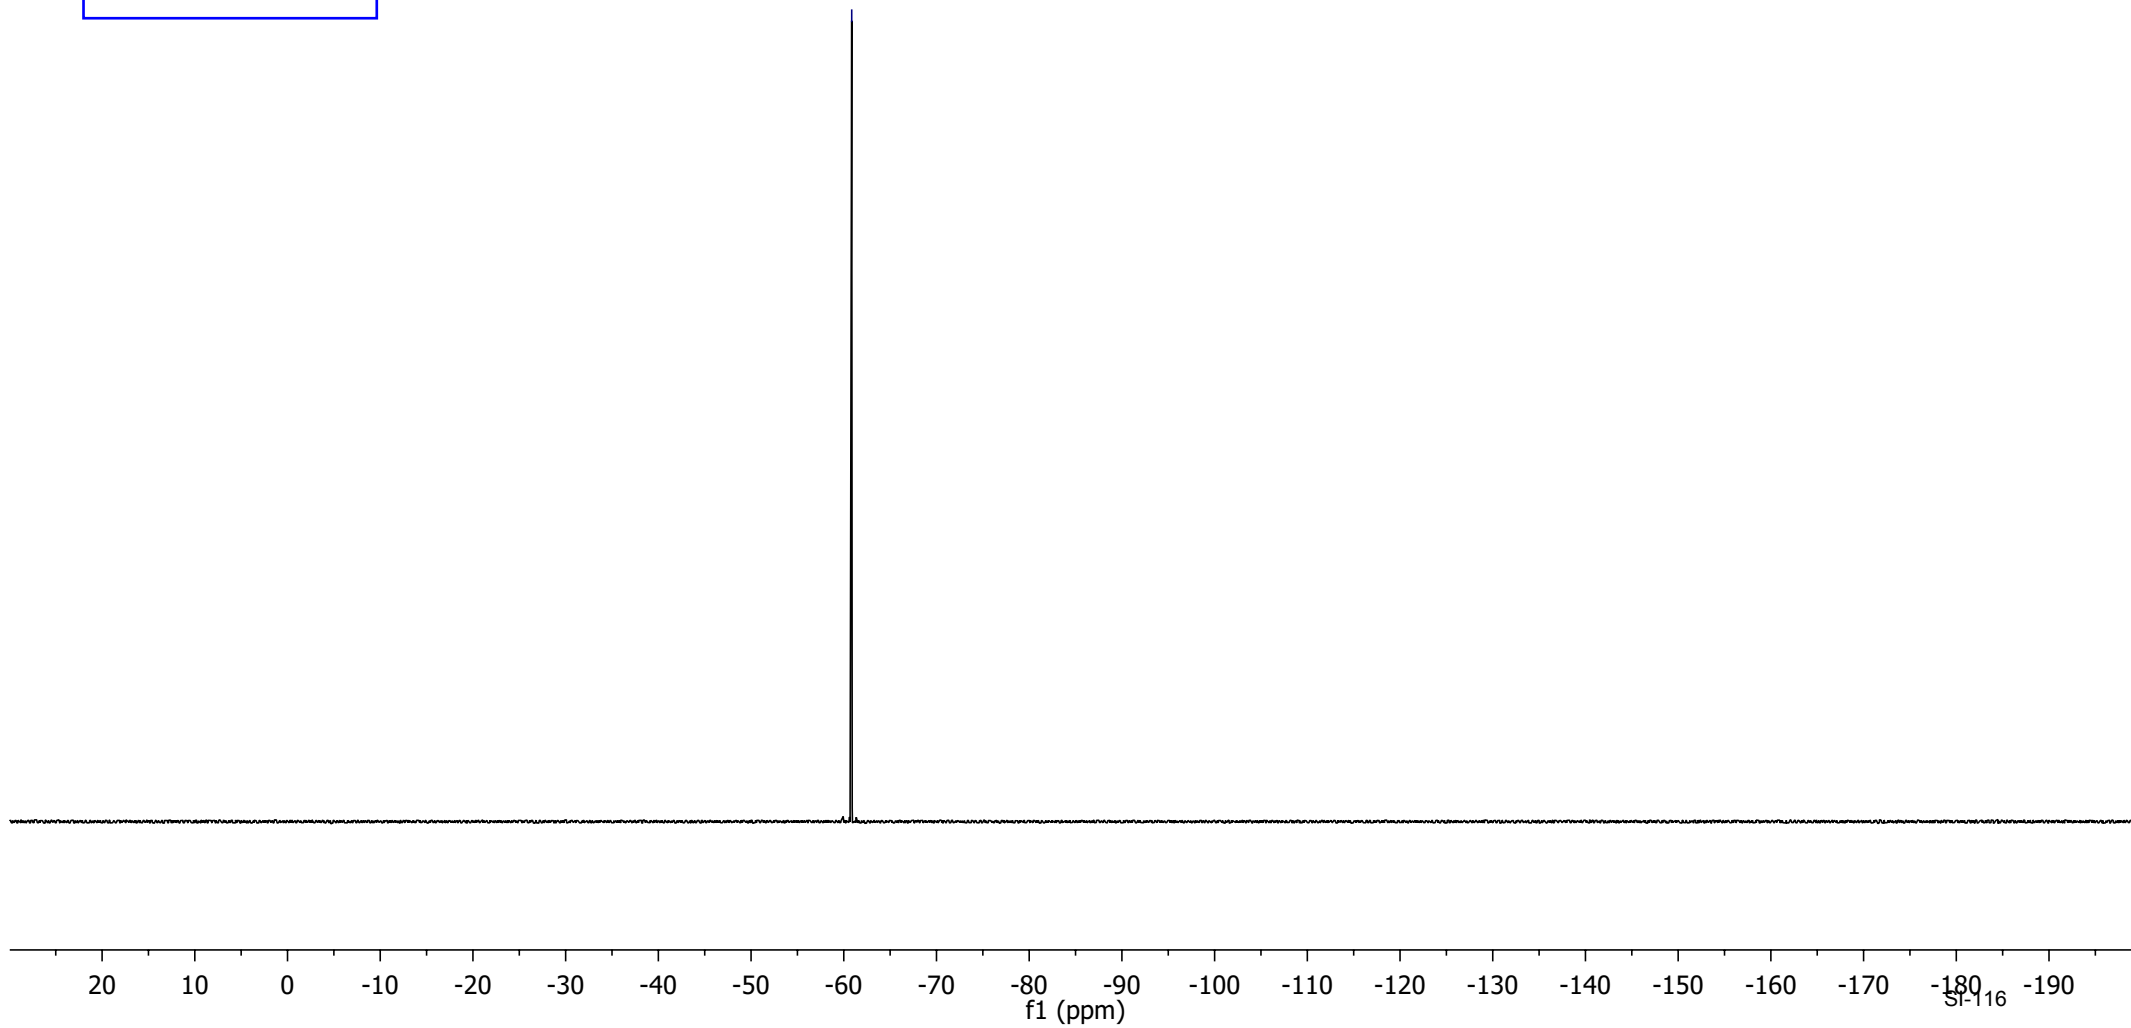

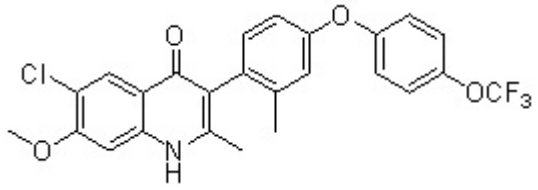

**62**

<sup>1</sup>H, 400 MHz, DMSO

11.68

7.99  
7.42  
7.39  
7.15  
7.13  
7.08  
7.06  
6.99  
6.88  
6.87

3.96

2.09  
2.01

0.91

0.71

1.78

1.87

1.85

0.87

0.91

3.00

2.97

2.99

14.0 13.5 13.0 12.5 12.0 11.5 11.0 10.5 10.0 9.5 9.0 8.5 8.0 7.5 7.0 6.5 6.0 5.5 5.0 4.5 4.0 3.5 3.0 2.5 2.0 1.5 1.0 0.5 0.0

f1 (ppm)

SI-117

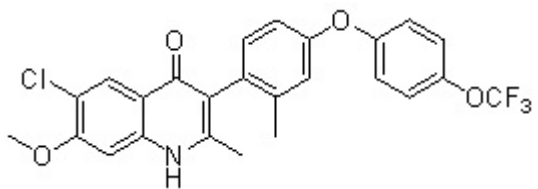

**62**  
<sup>13</sup>C, 126 MHz, DMSO

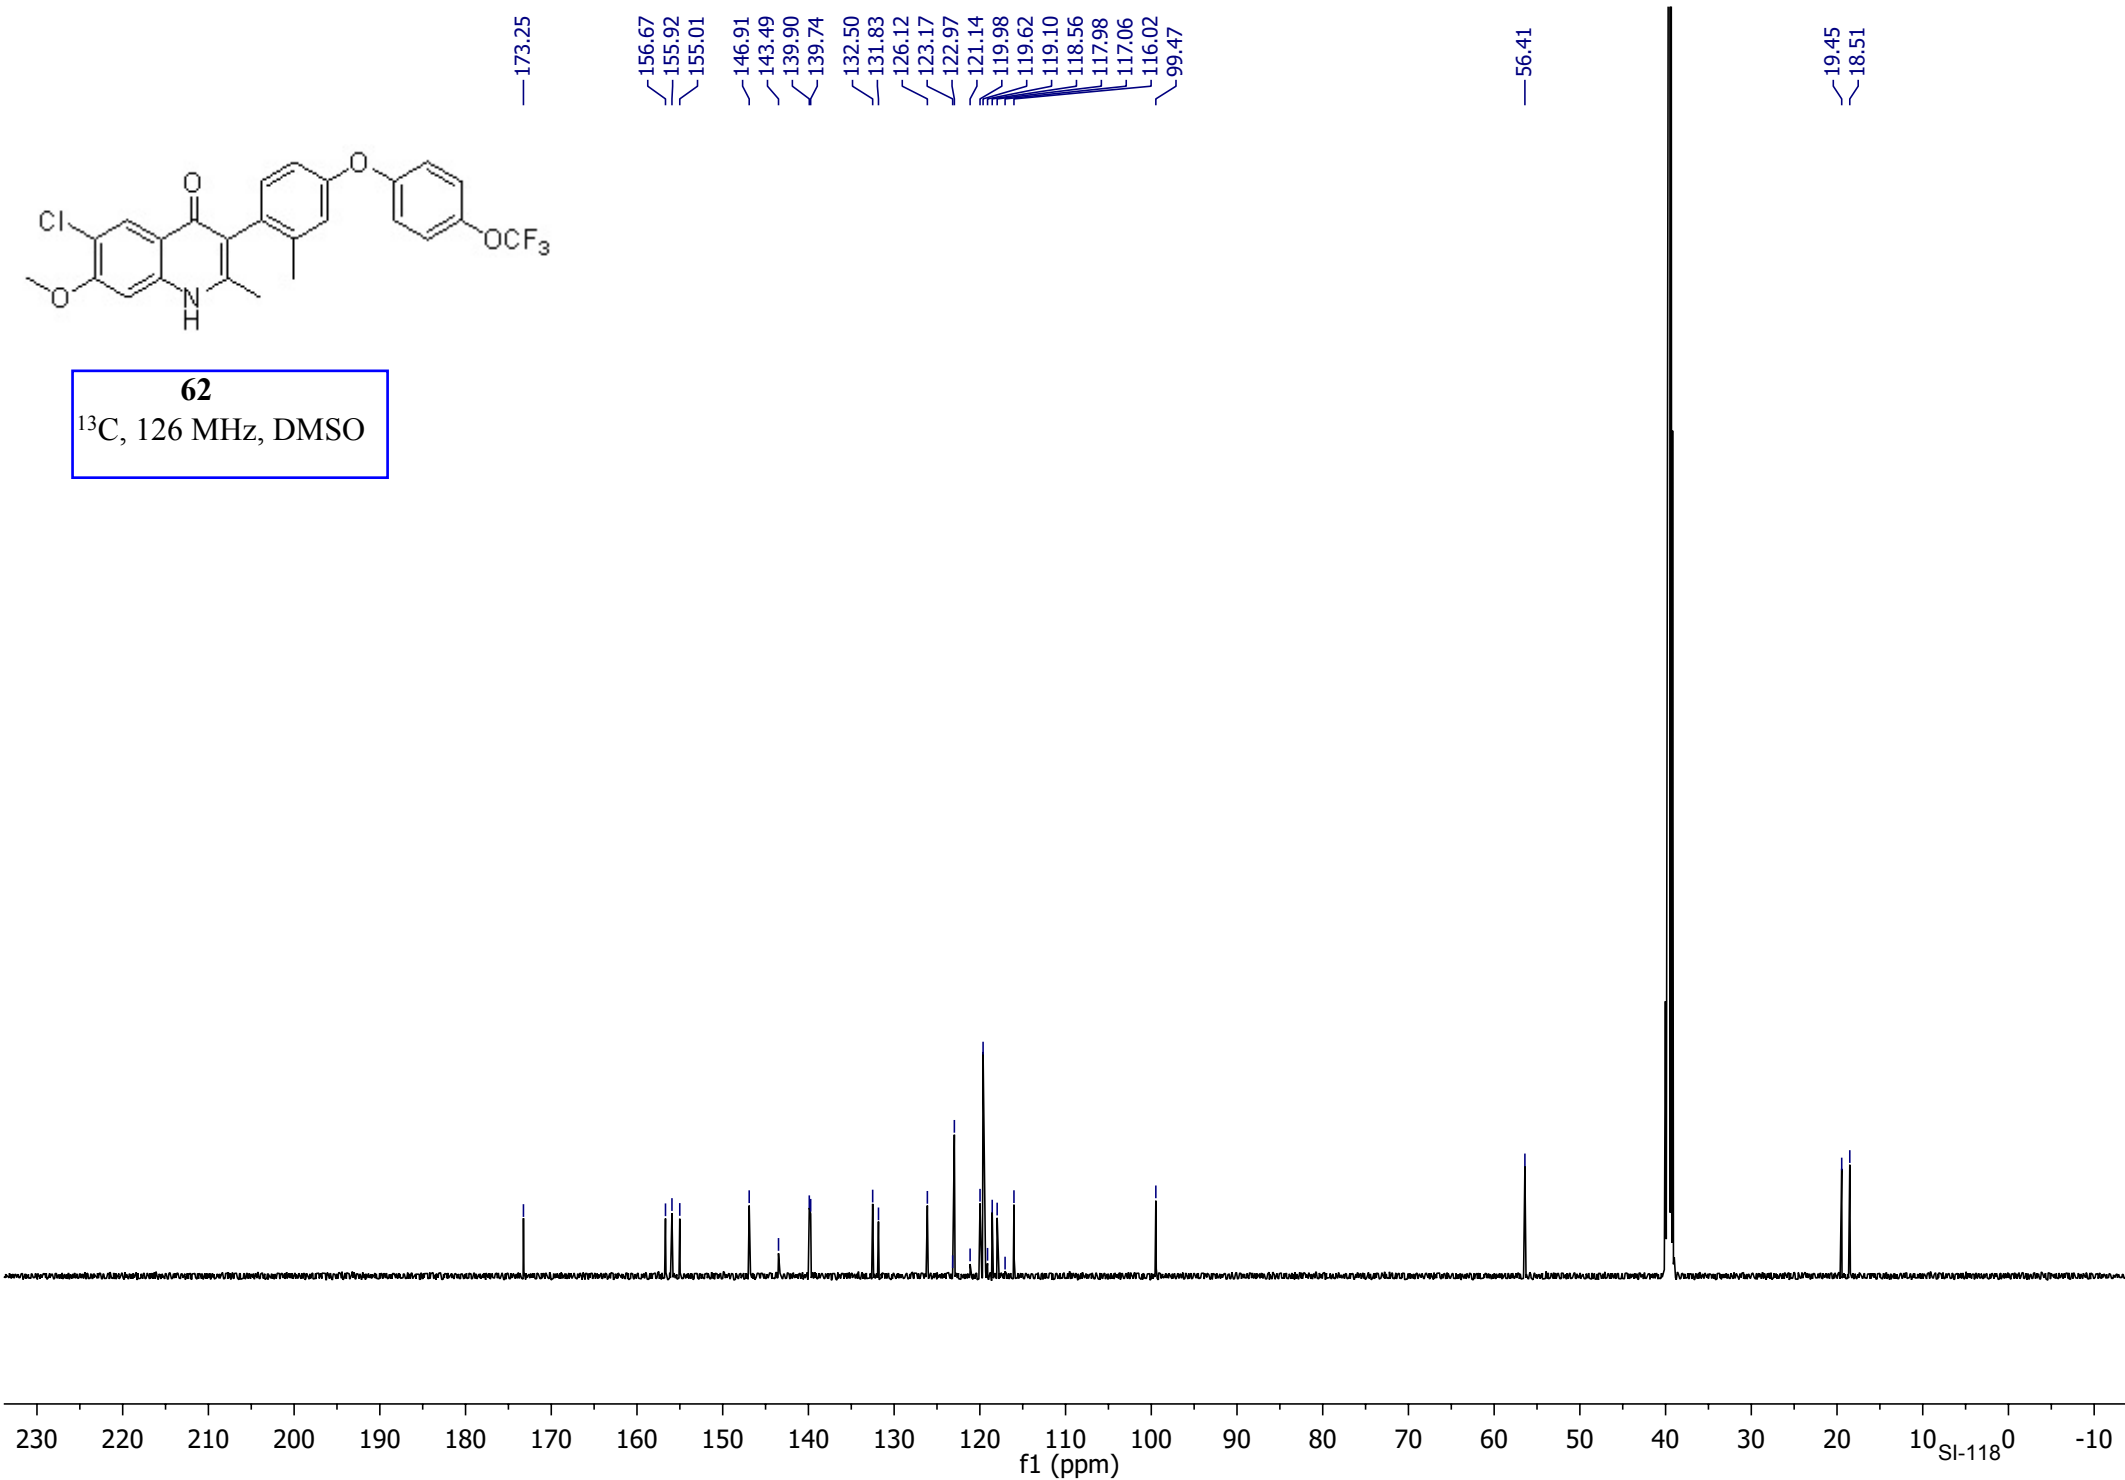



**62**

$^{19}\text{F}$ , 376 MHz, DMSO

—57.20

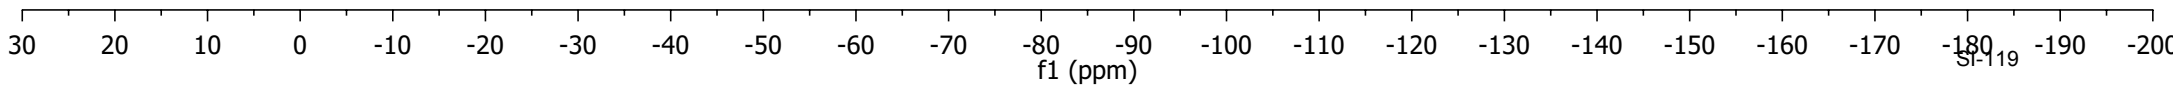



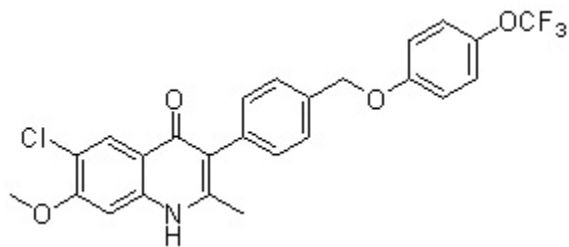

**63**

<sup>1</sup>H, 400 MHz, DMSO

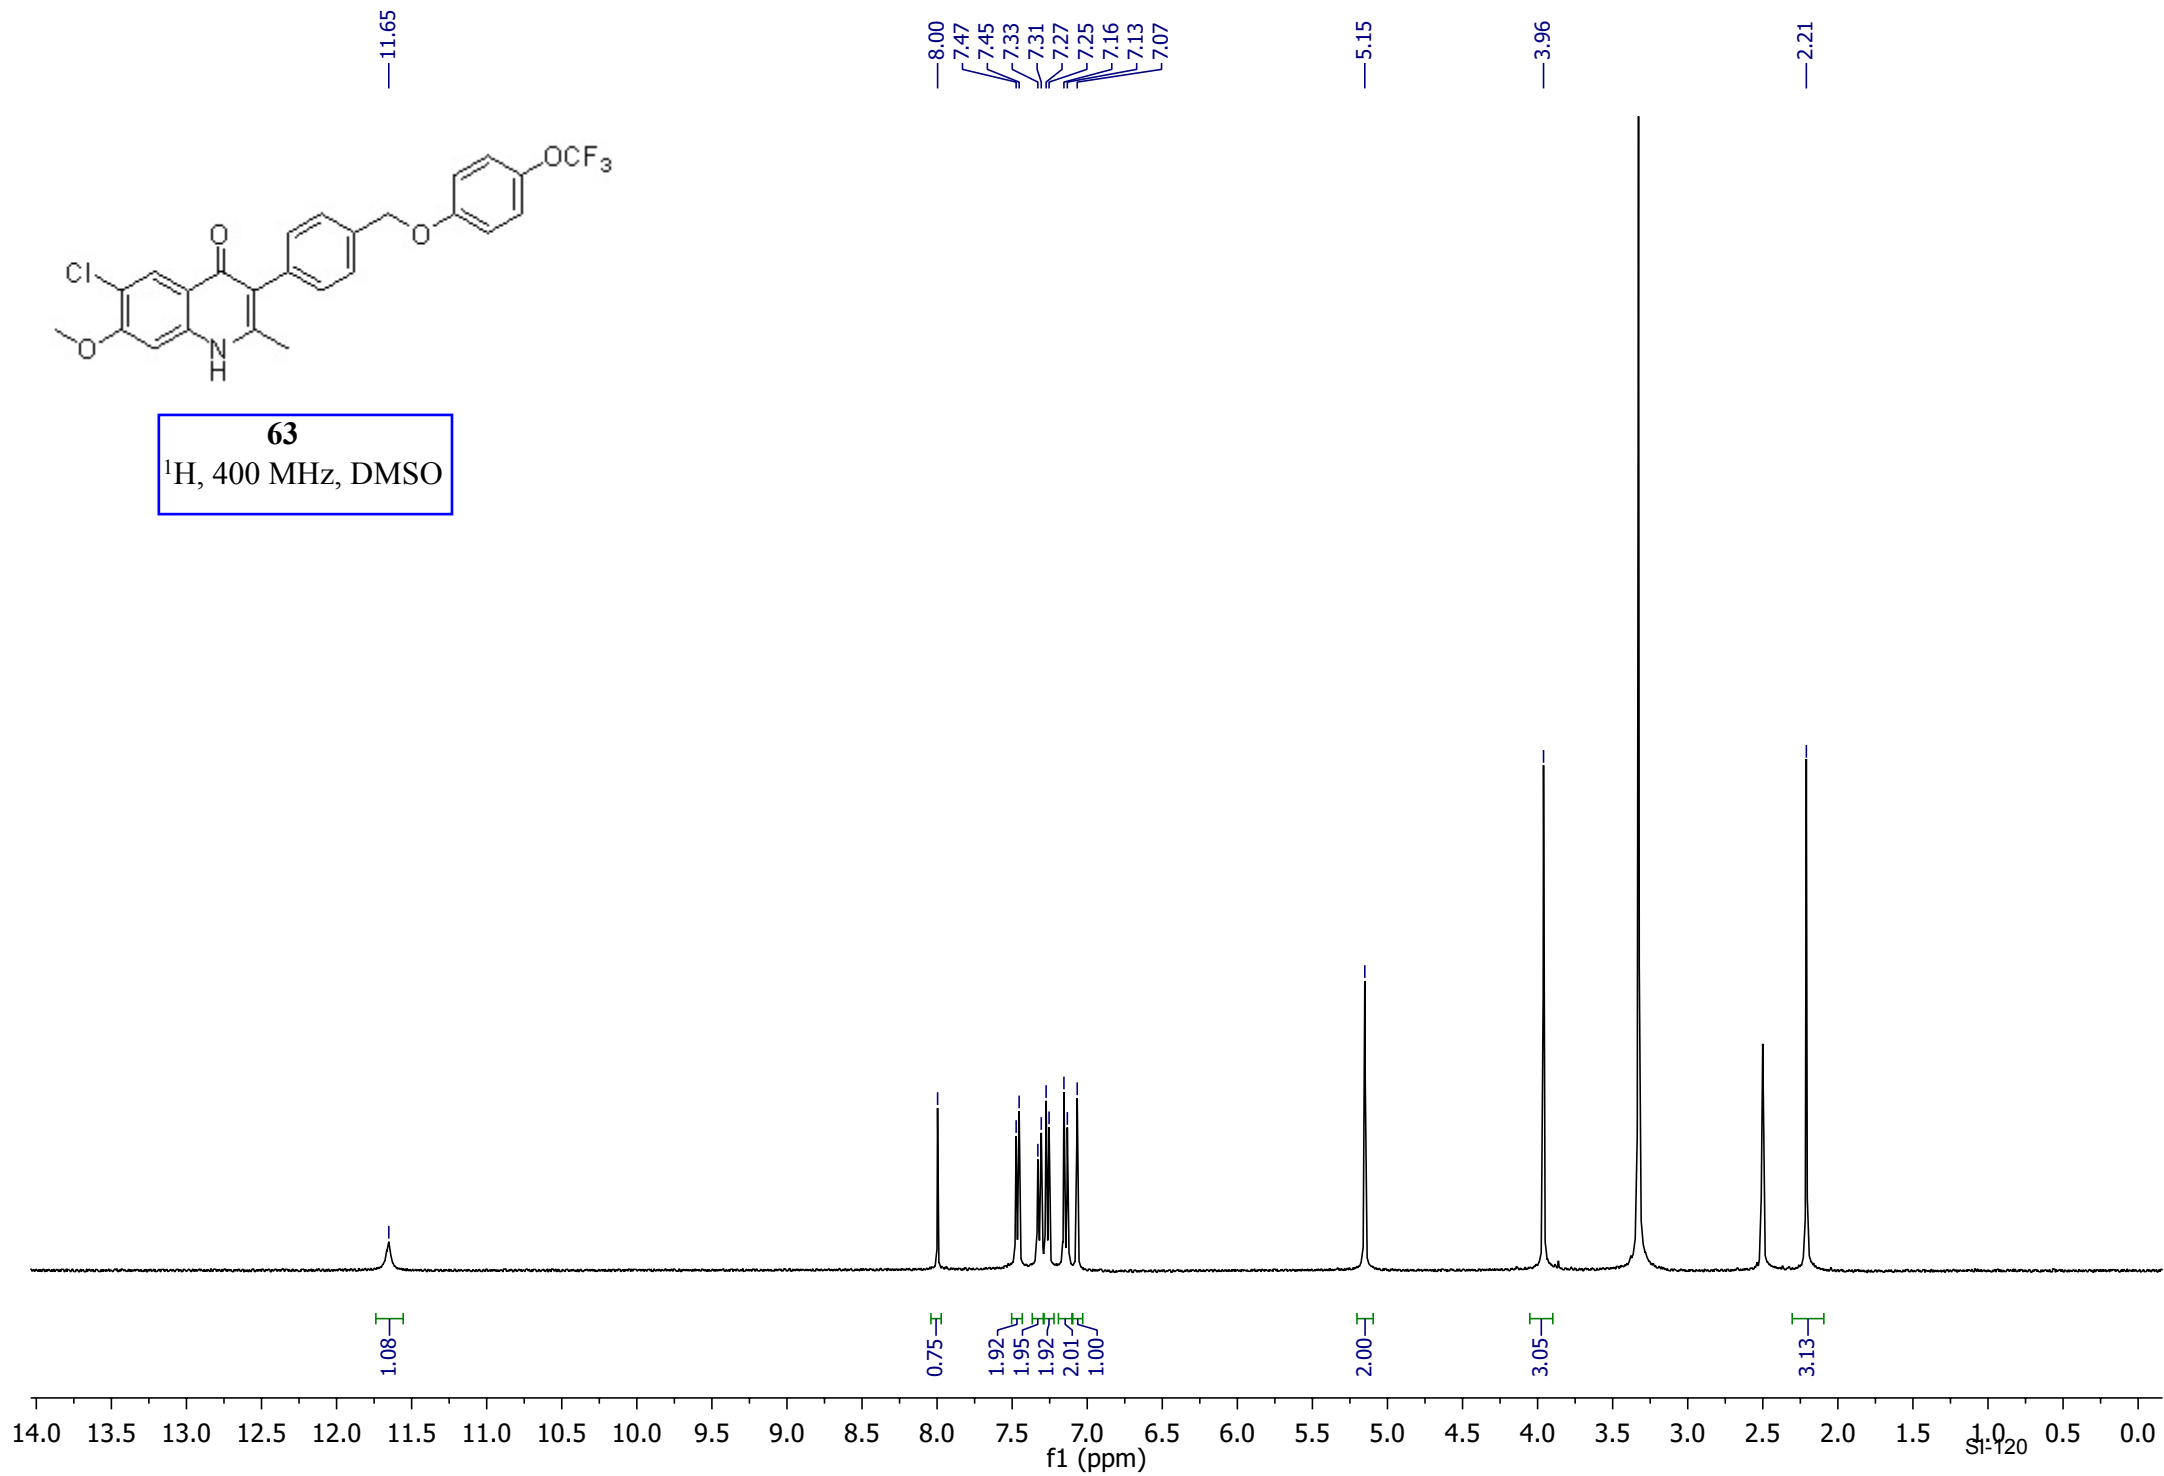



**63**

<sup>13</sup>C, 126 MHz, DMSO

—173.48

157.33

156.69

146.54

141.81

139.63

135.59

134.81

131.06

127.36

126.18

123.23

122.56

121.20

120.38

119.17

118.77

117.98

117.14

115.95

—99.46

—69.71

—56.39

—18.91

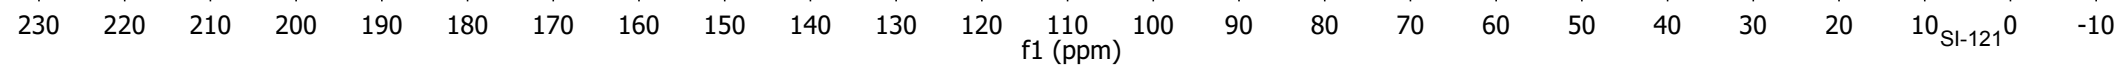

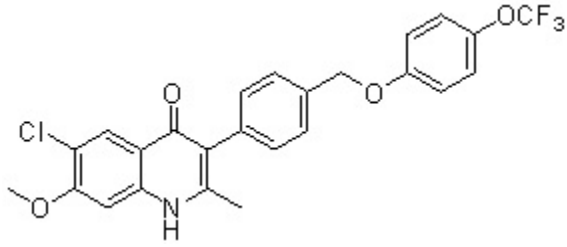

**63**

$^{19}\text{F}$ , 376 MHz, DMSO

—57.30

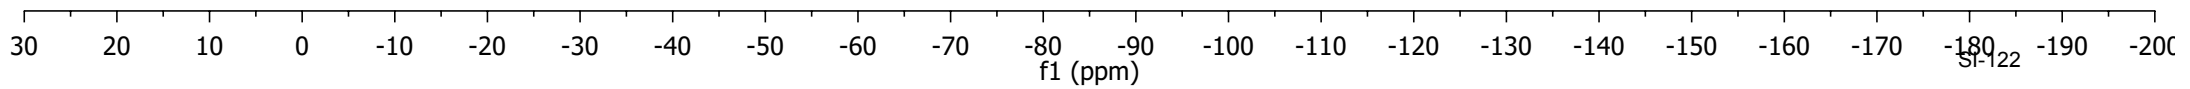

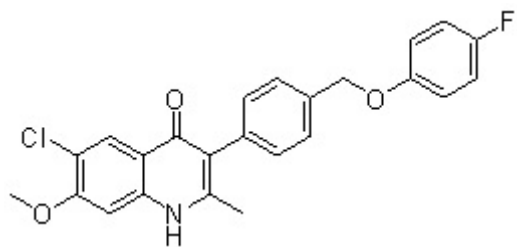

**64**

<sup>1</sup>H, 400 MHz, DMSO

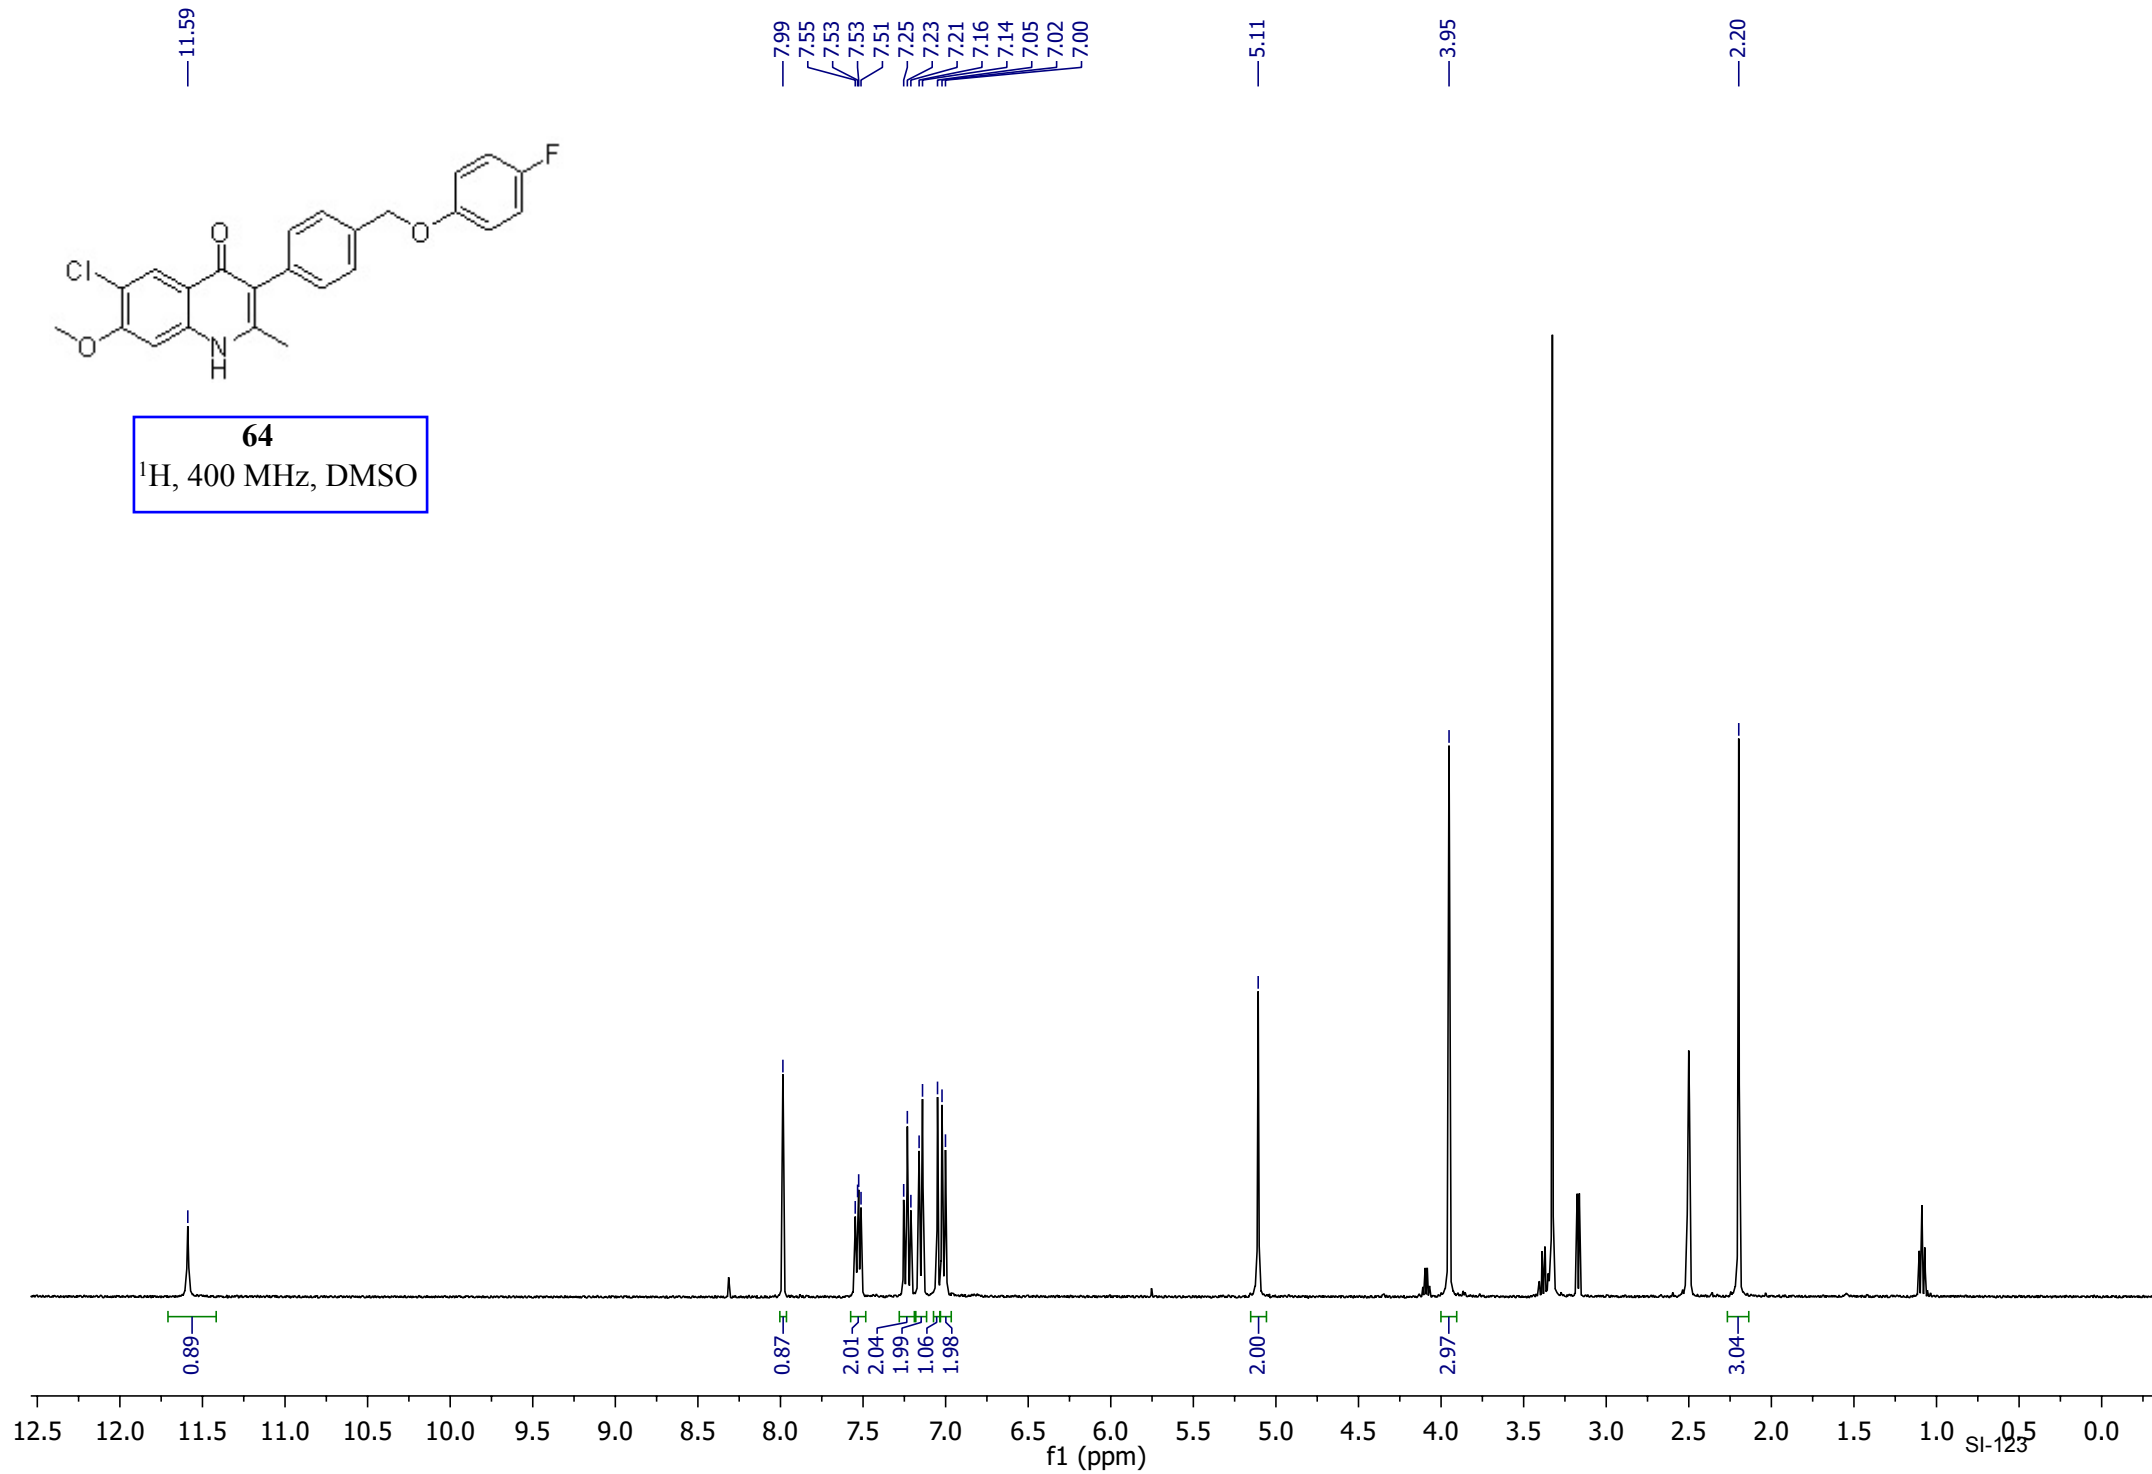



**64**

$^{13}\text{C}$ , 126 MHz, DMSO

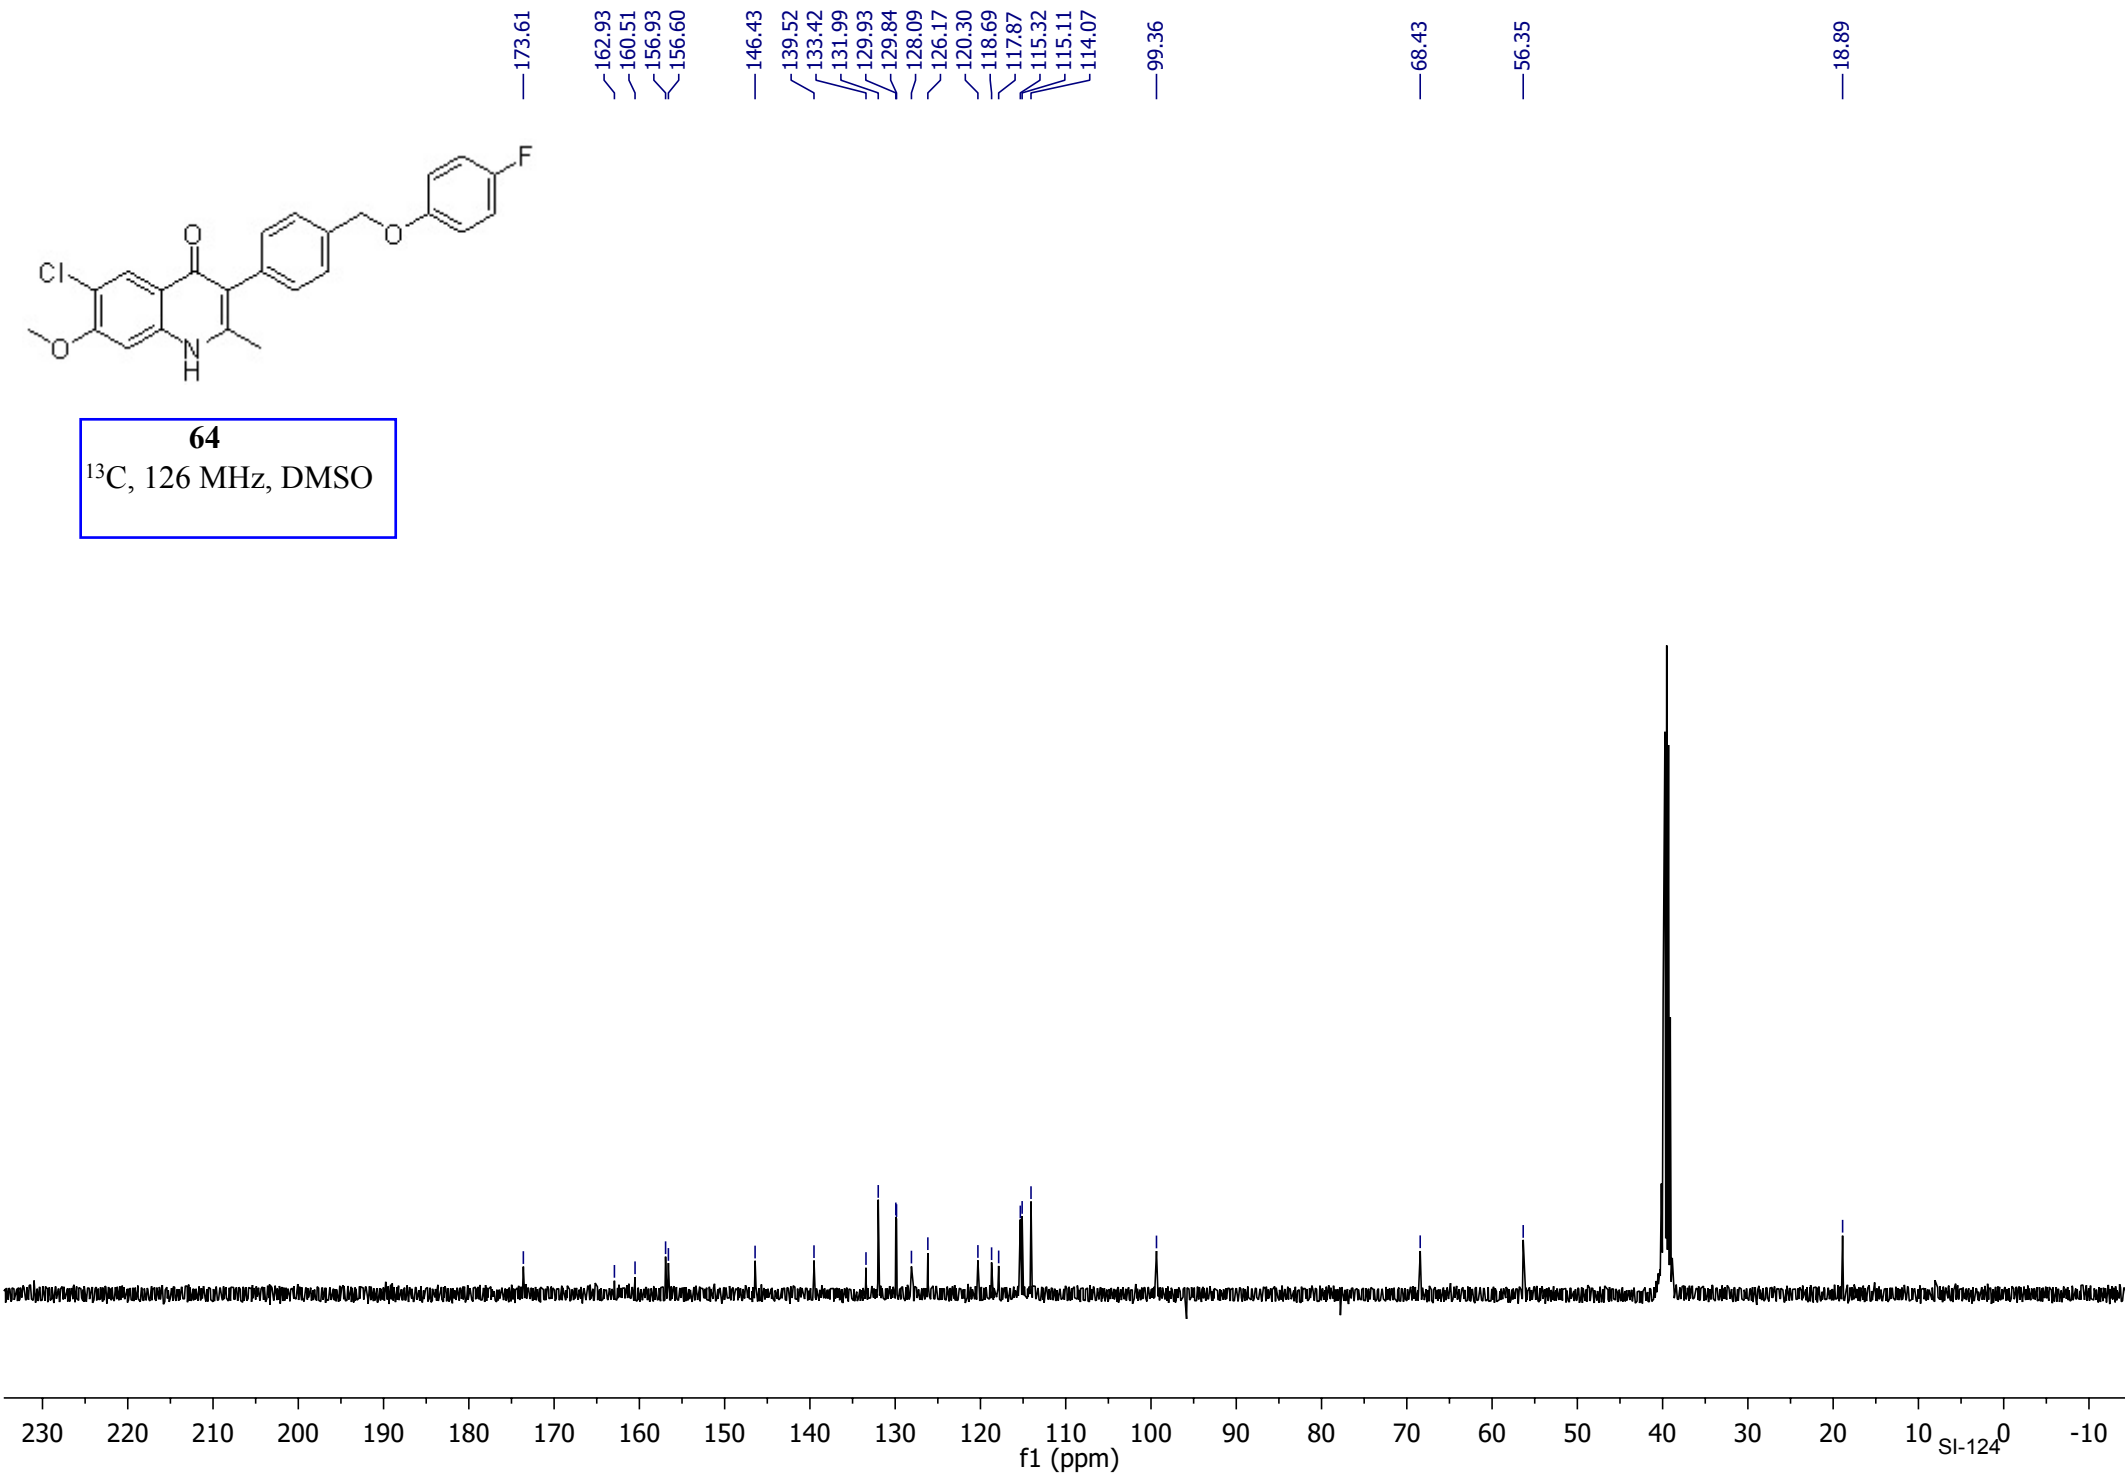

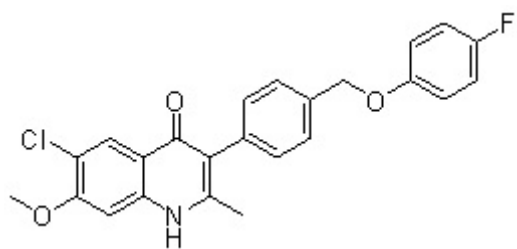

**64**

$^{19}\text{F}$ , 376 MHz, DMSO

— -114,58

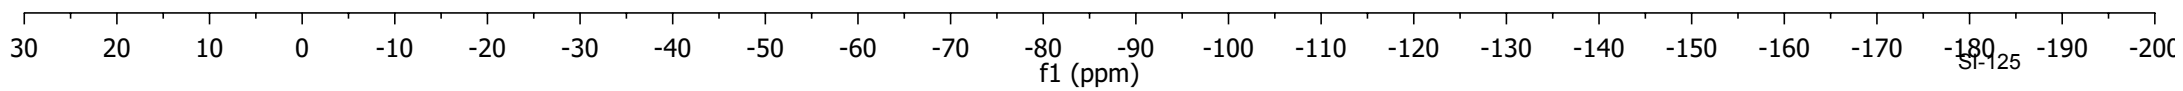

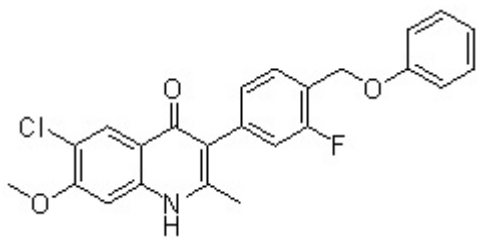

**65**

<sup>1</sup>H, 400 MHz, DMSO

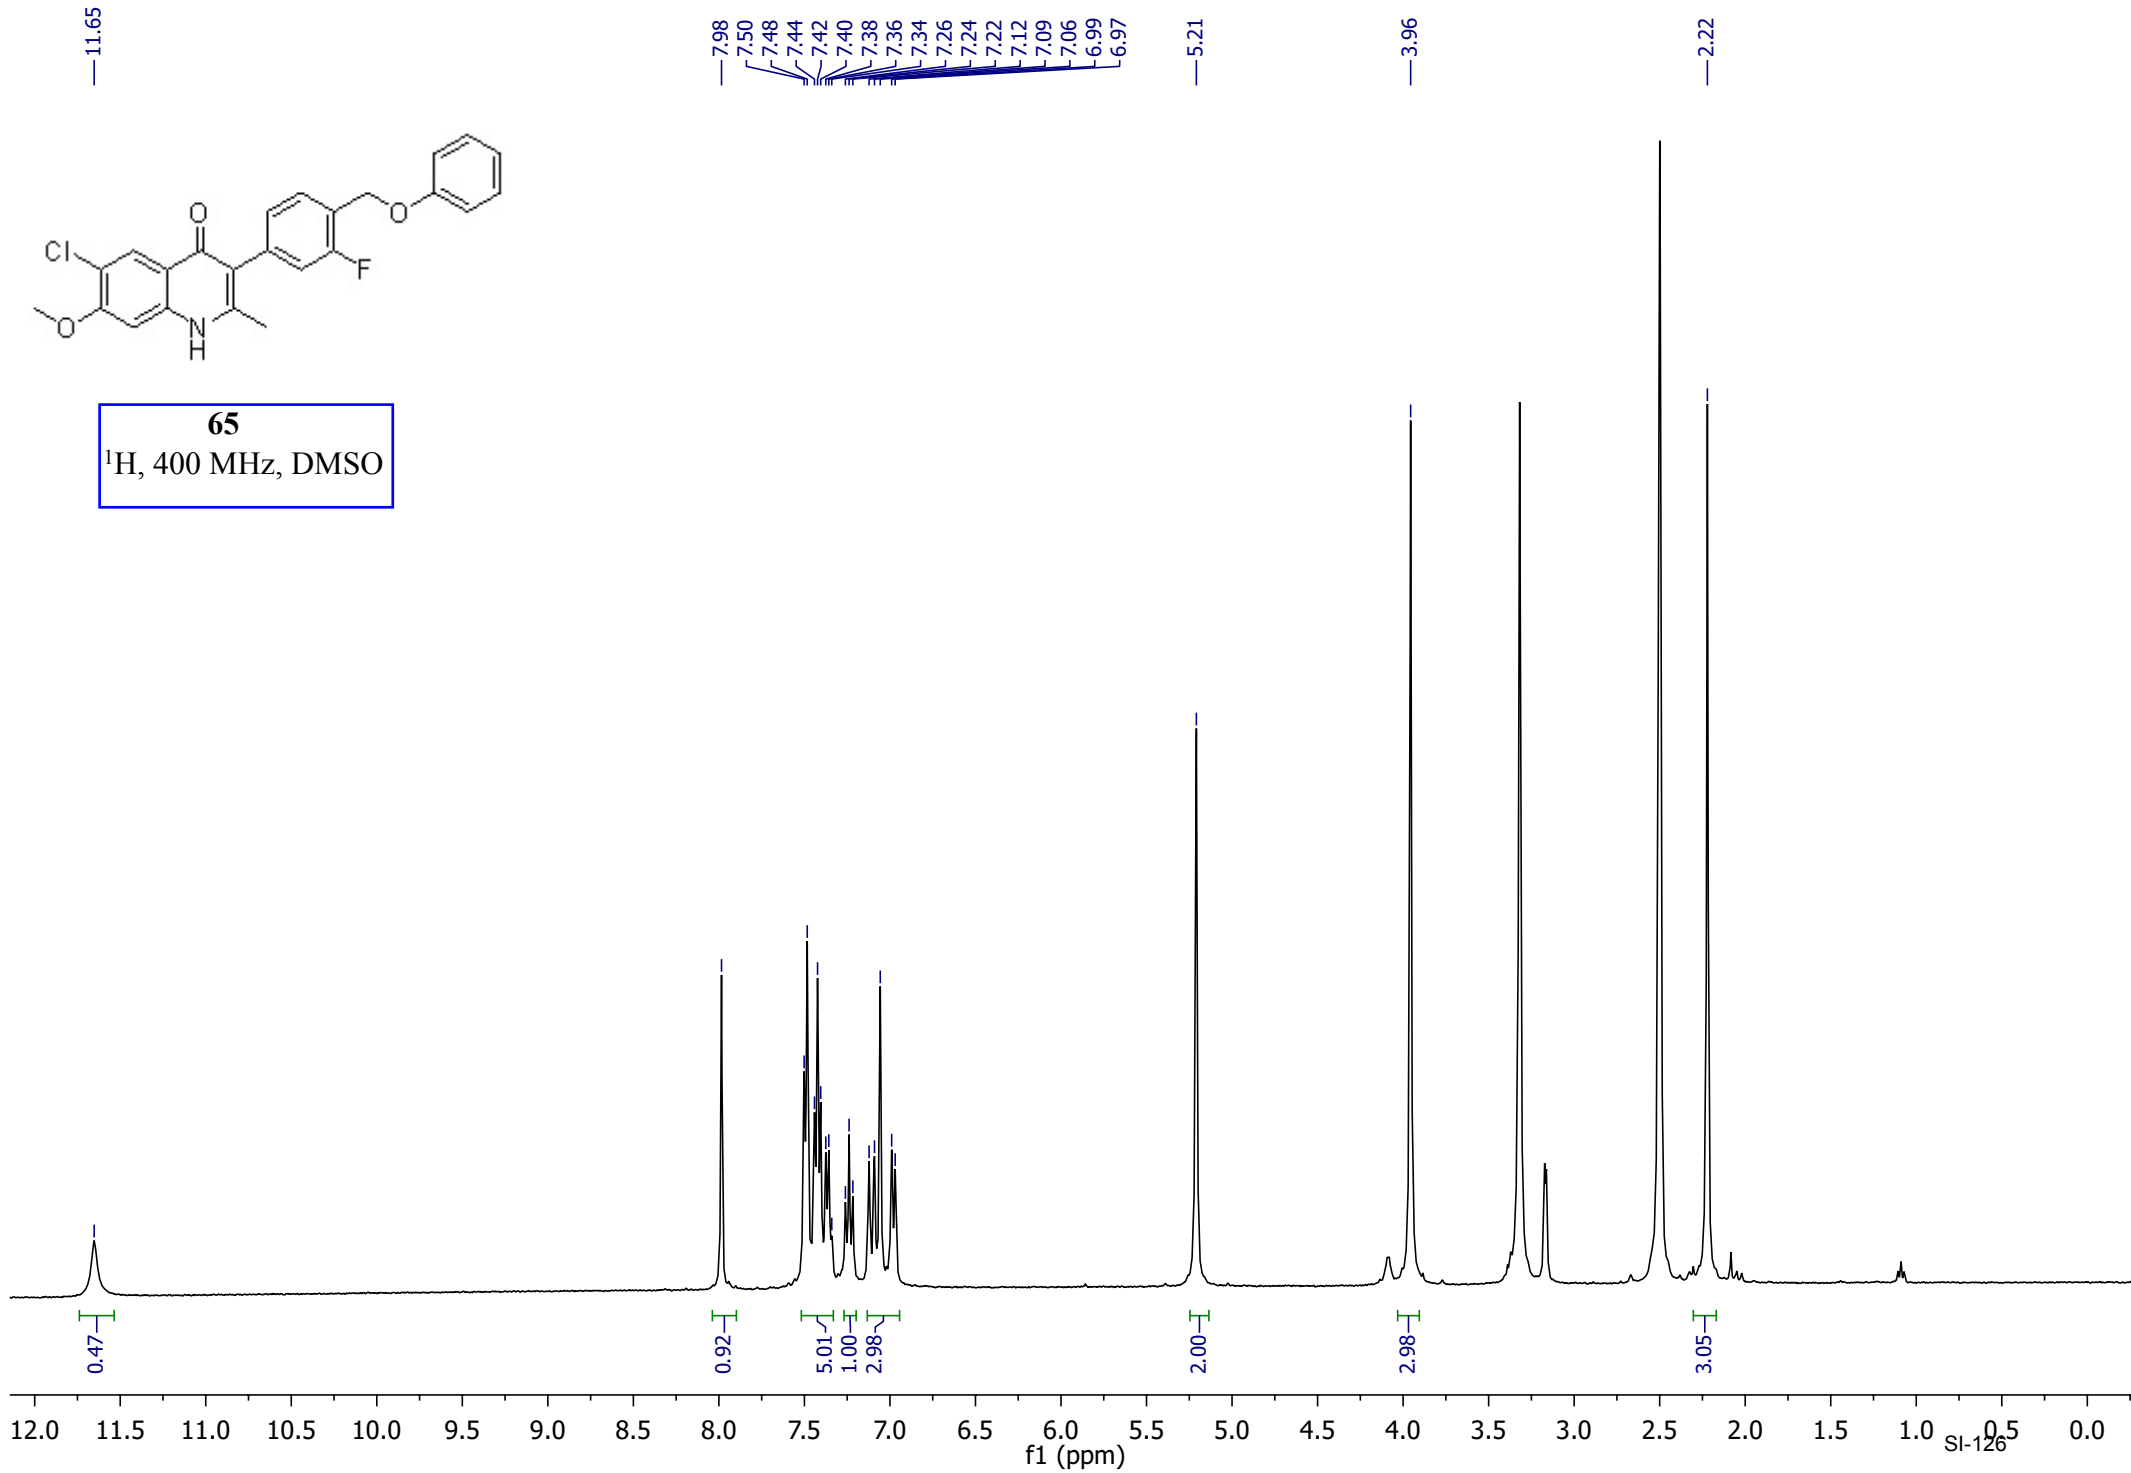

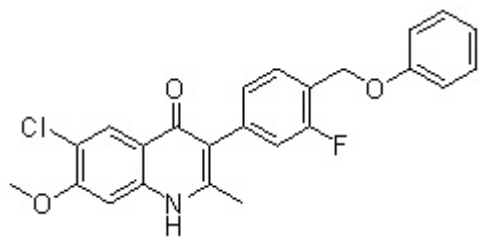

**65**  
<sup>13</sup>C, 101 MHz, DMSO

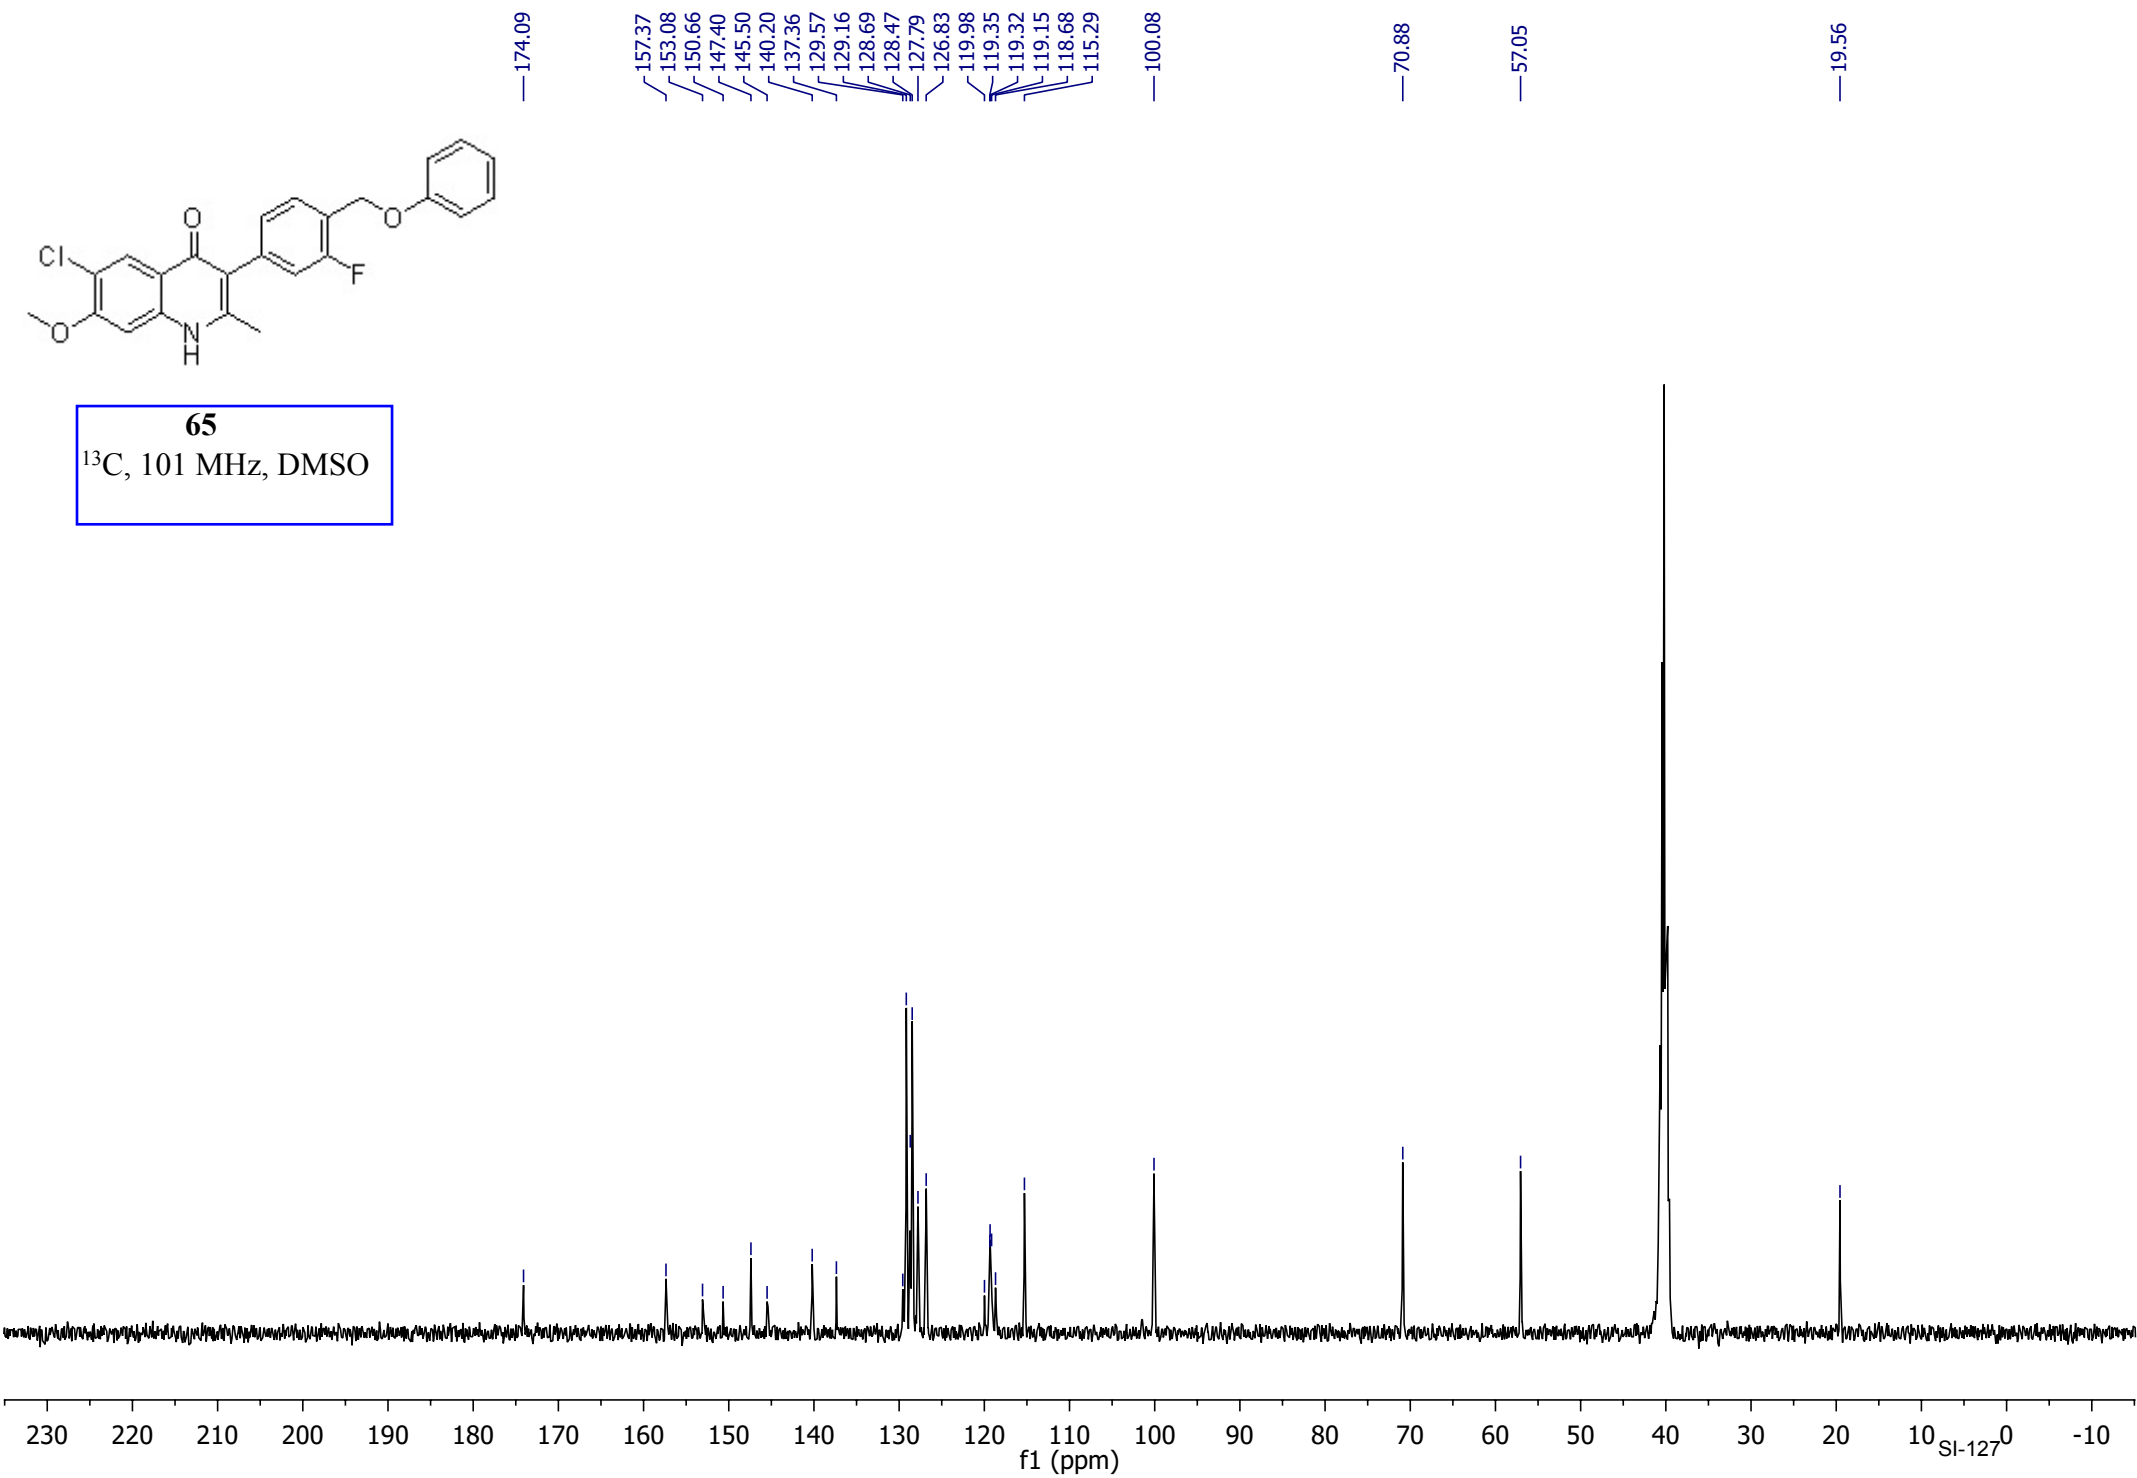



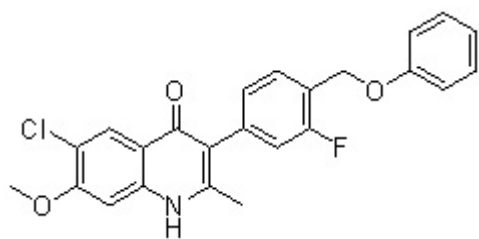

**65**  
<sup>19</sup>F, 376 MHz, DMSO

— -136.41

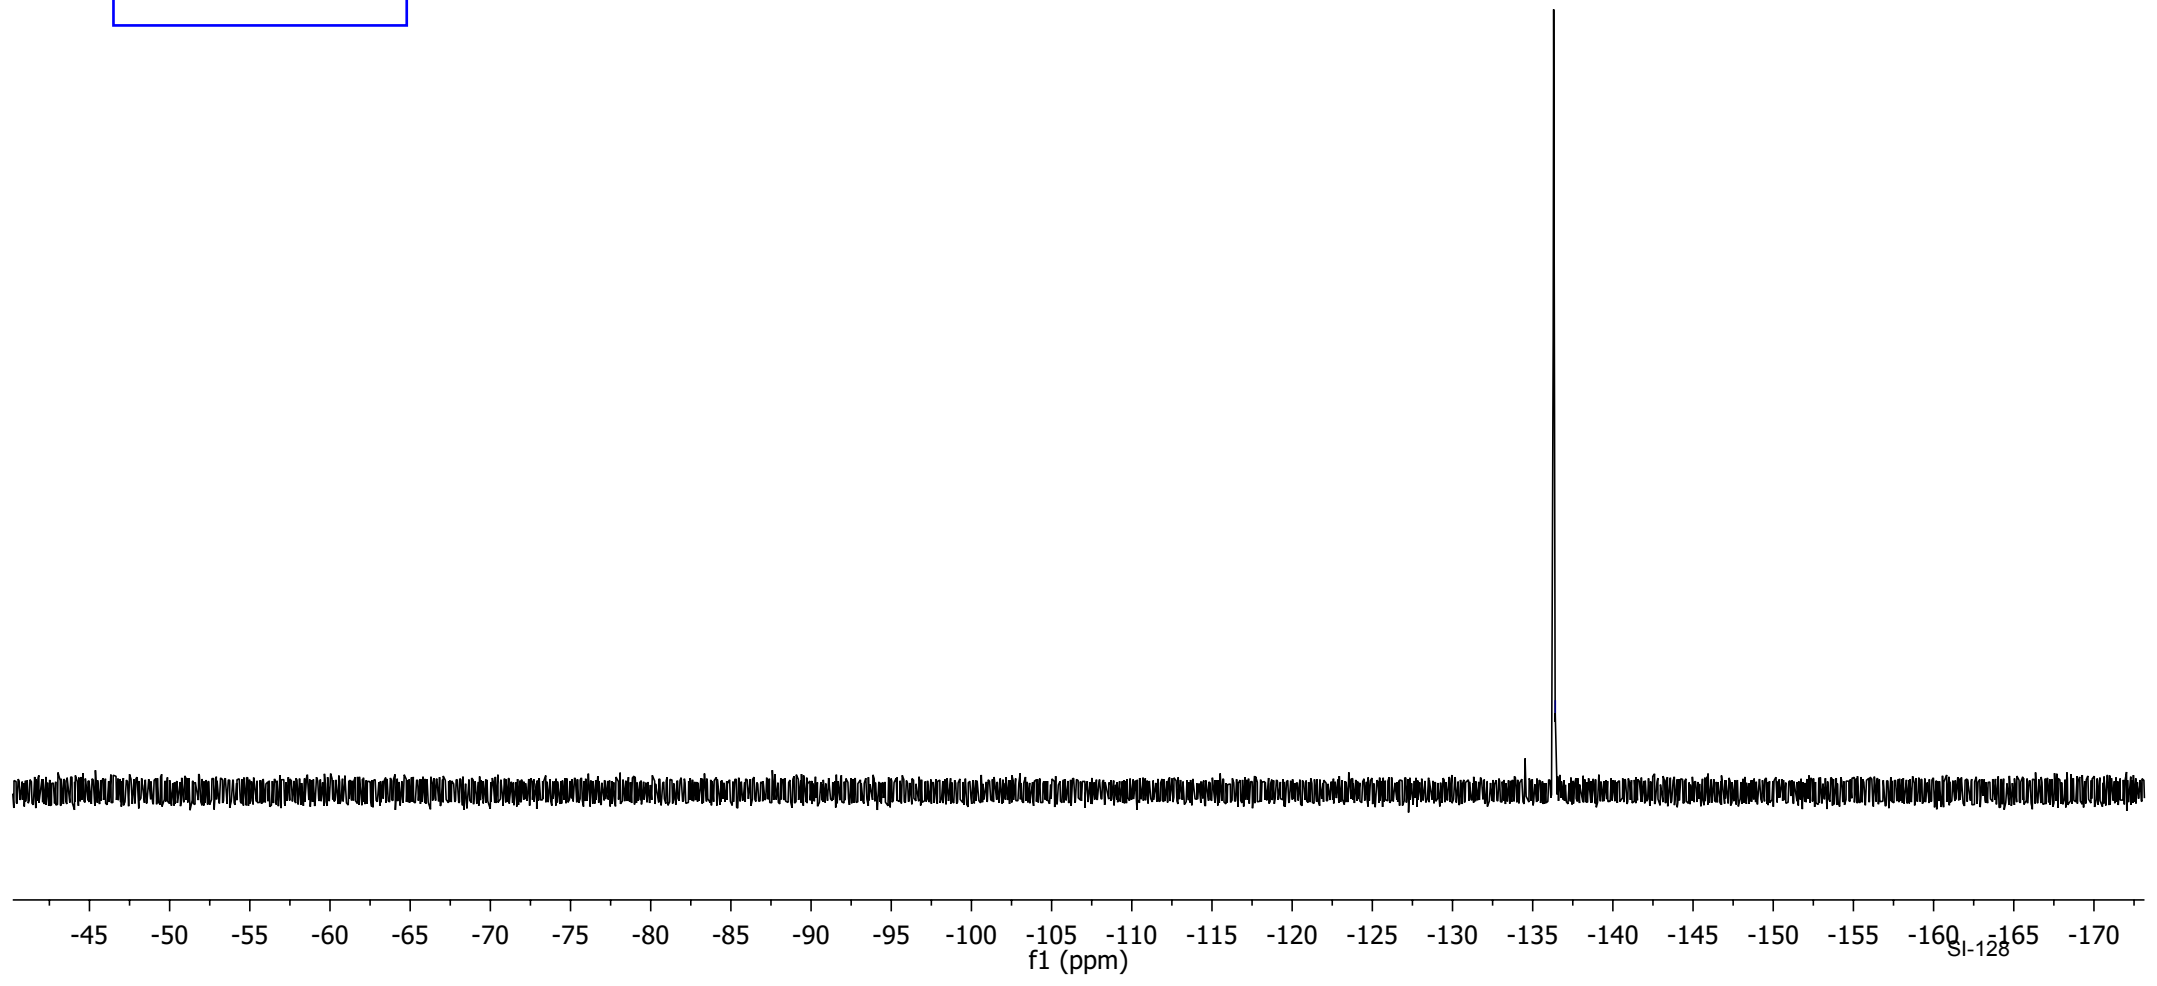

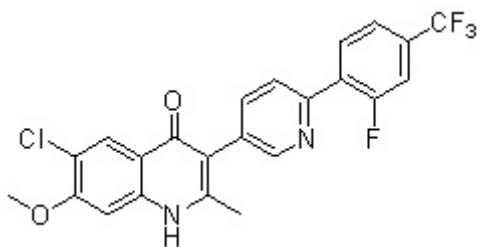

**66**

<sup>1</sup>H, 400 MHz, DMSO

—11.83

8.66  
8.66  
8.26  
8.24  
8.22  
8.02  
7.93  
7.91  
7.89  
7.88  
7.86  
7.83  
7.75  
7.73  
—7.08

—3.97

—2.31

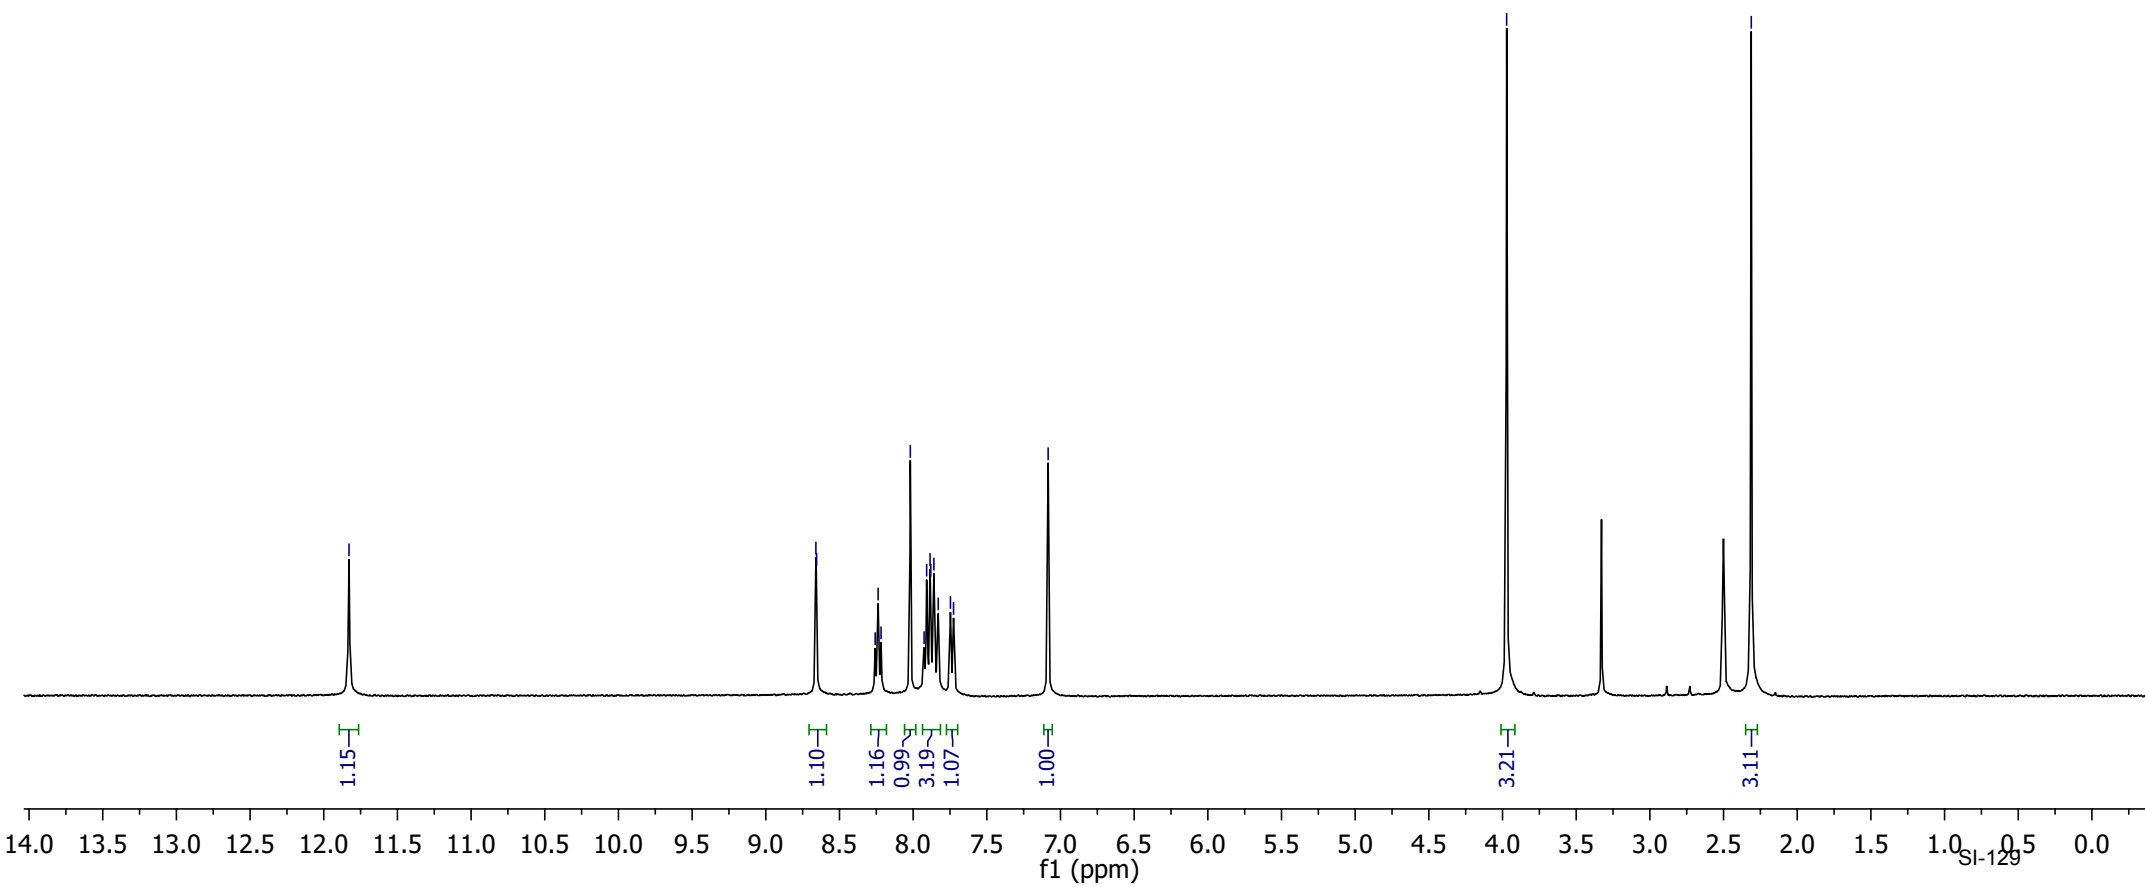

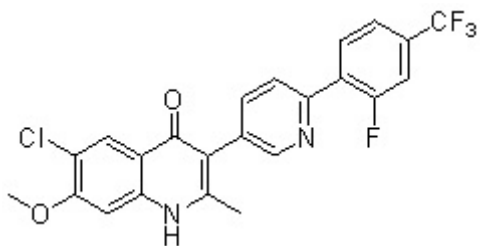

**66**

<sup>13</sup>C, 101 MHz, DMSO

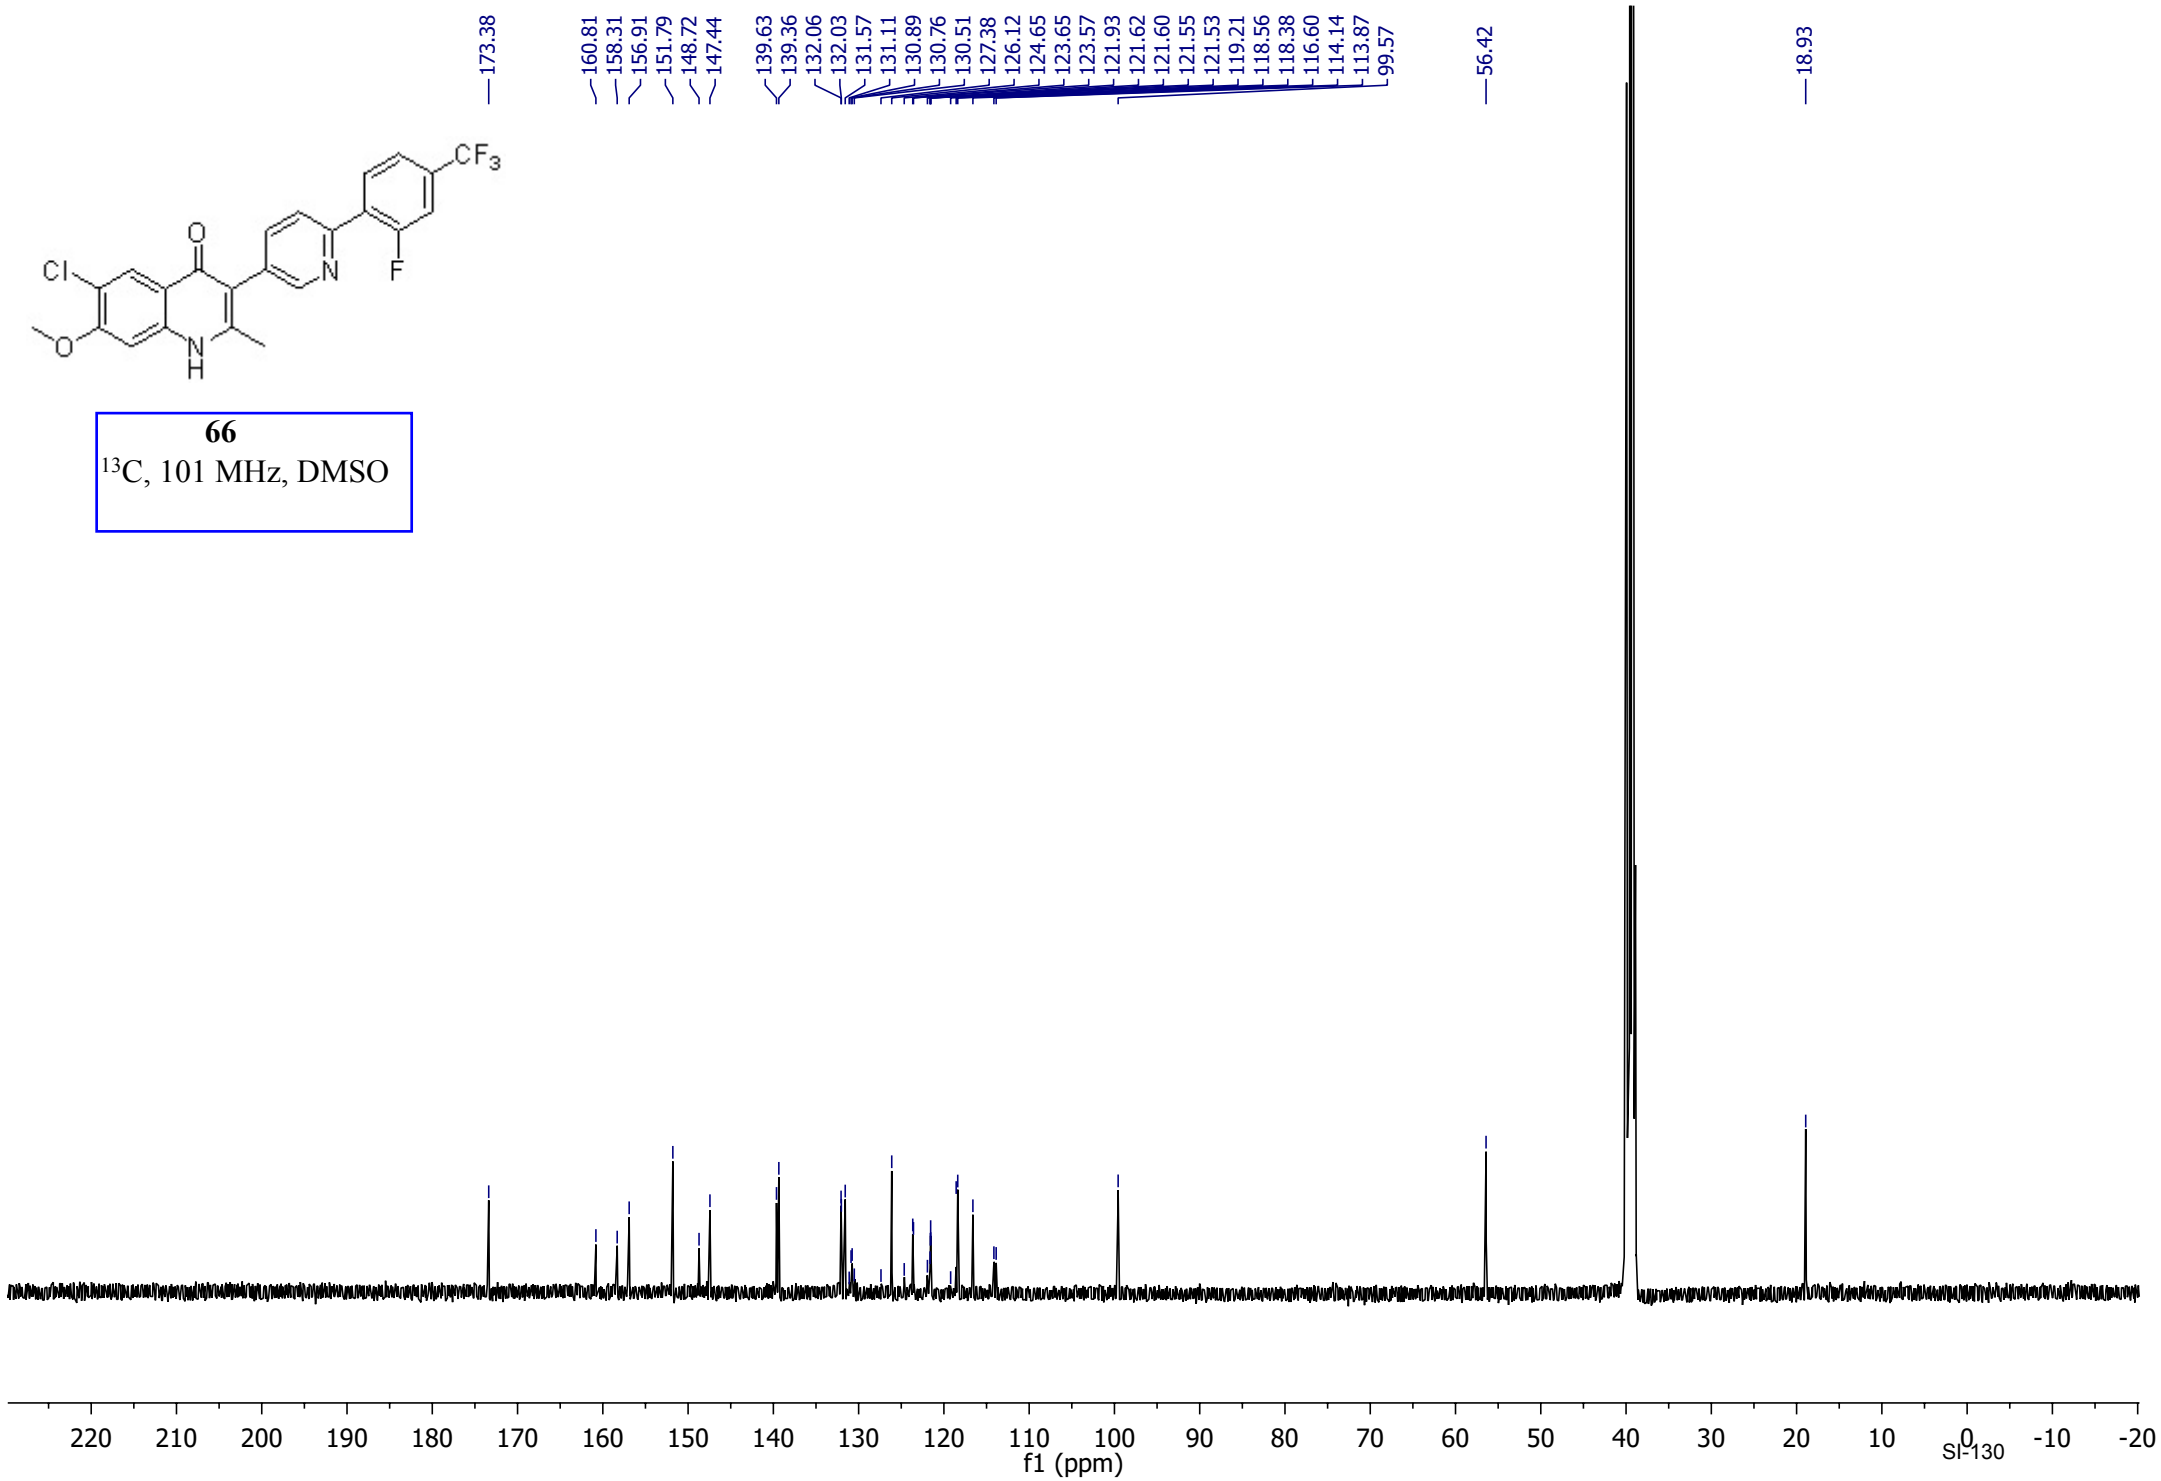

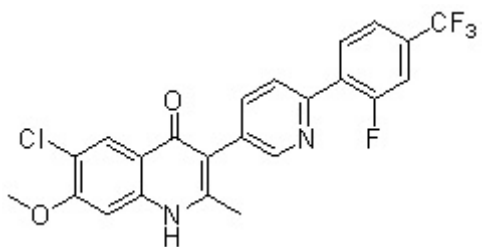

**66**

$^{19}\text{F}$ , 376 MHz, DMSO

— -61.22

— -114.52

20 10 0 -10 -20 -30 -40 -50 -60 -70 -80 -90 -100 -110 -120 -130 -140 -150 -160 -170 -180 -190  
f1 (ppm) SI-131

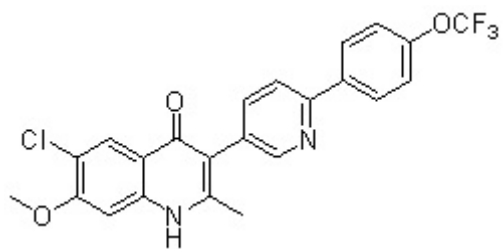

**67**  
<sup>1</sup>H, 400 MHz, DMSO

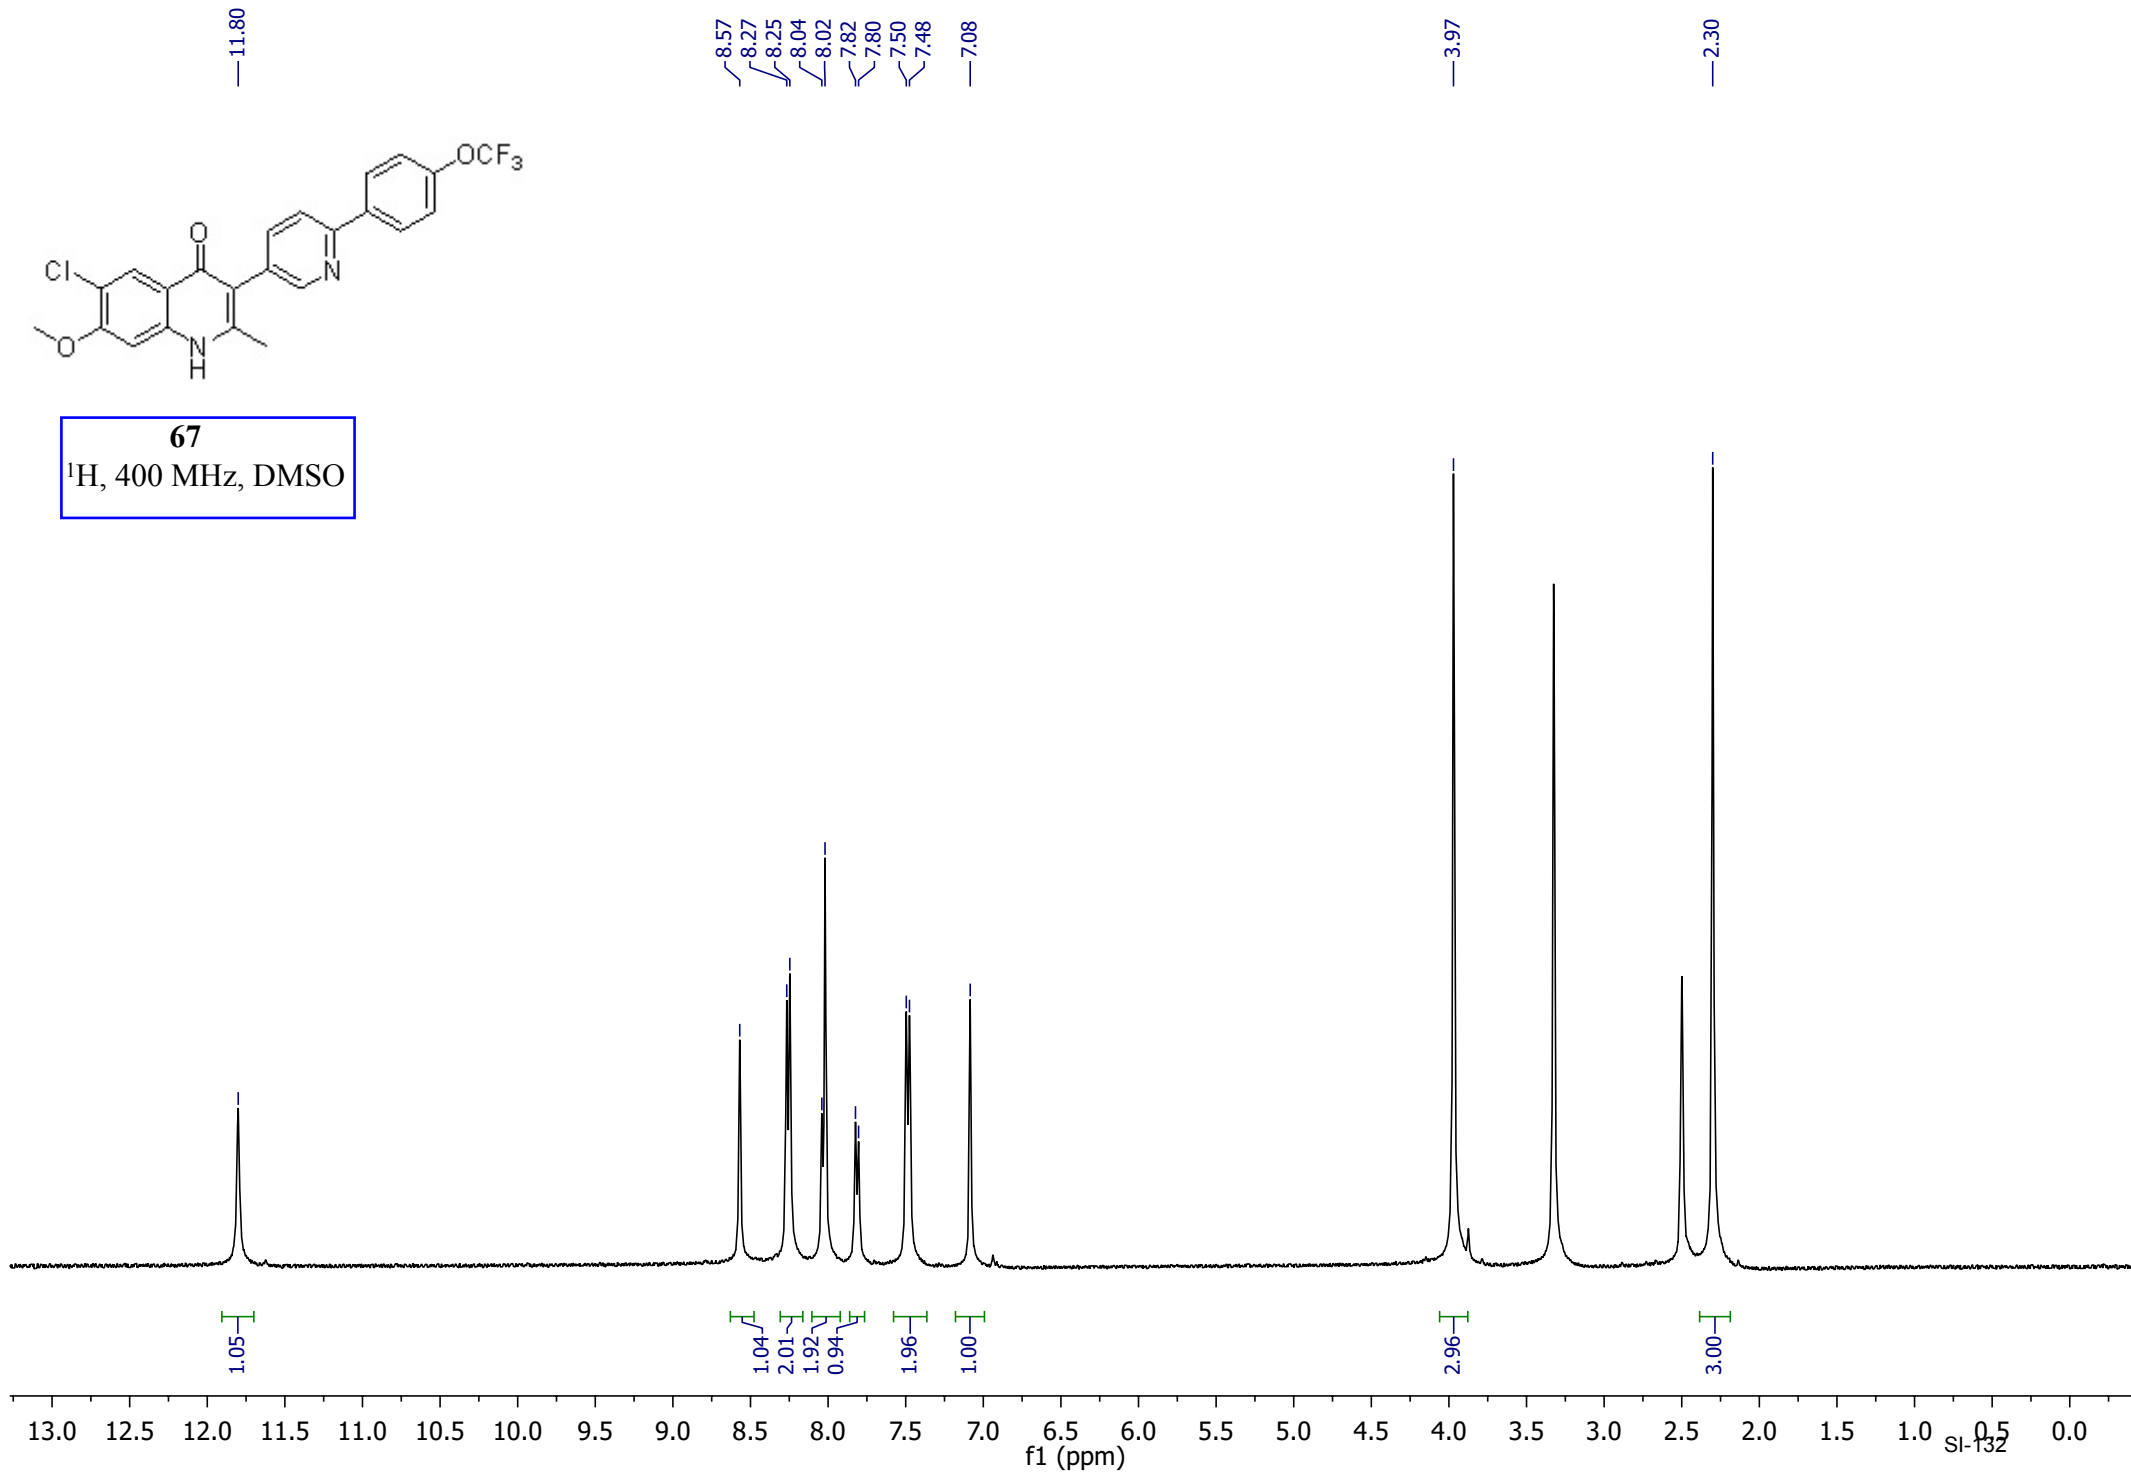

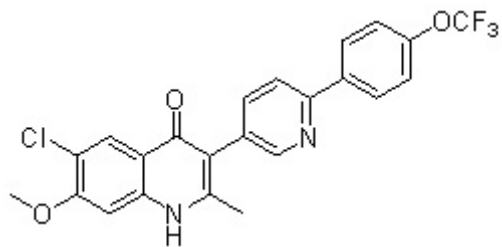

**67**  
 $^{13}\text{C}$ , 101 MHz, DMSO

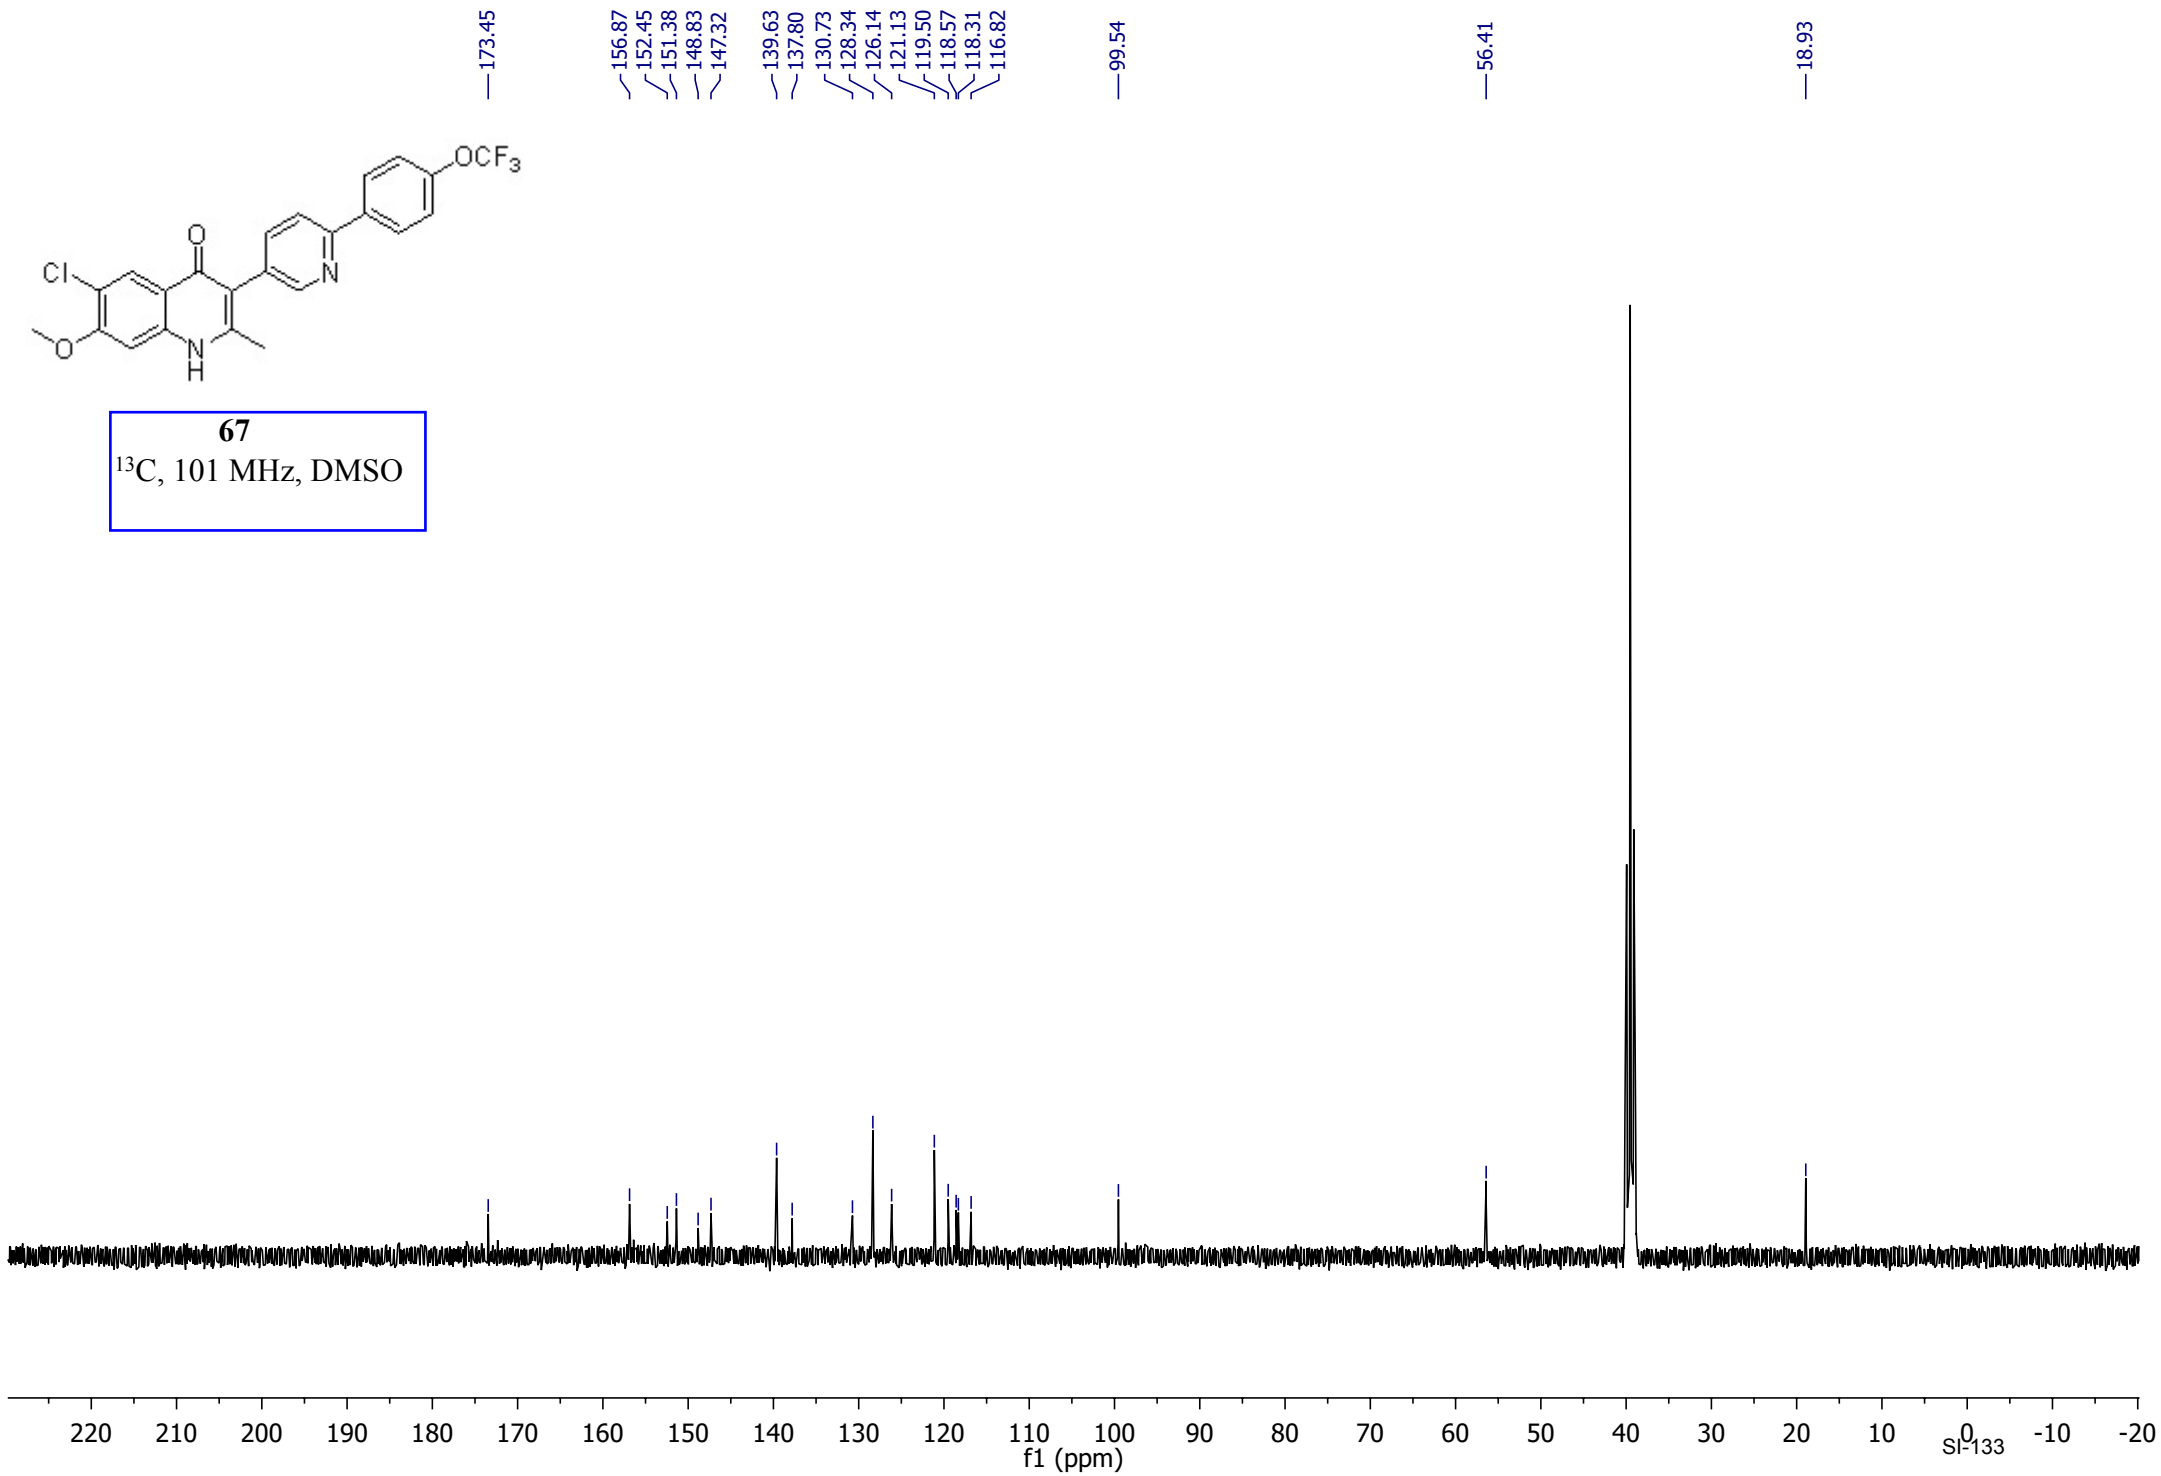

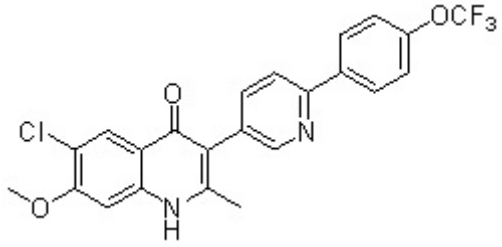

**67**

$^{19}\text{F}$ , 376 MHz, DMSO

-56.70

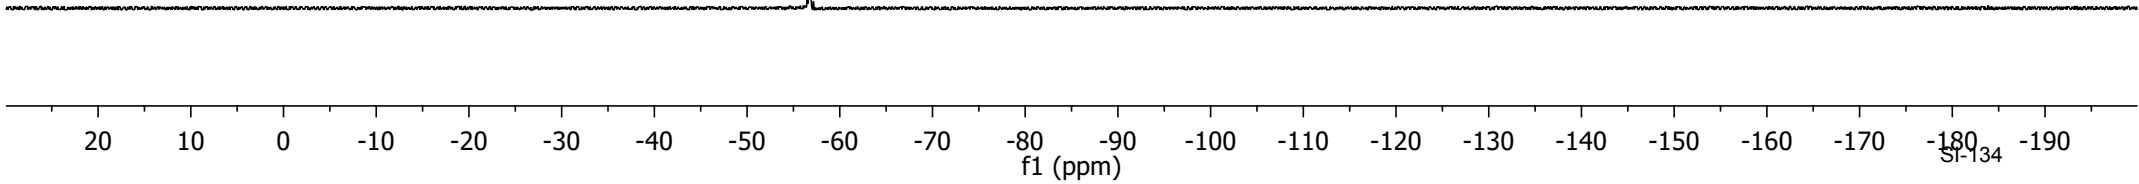

Supplement: jm500942v_si_001.pdf [file jm500942v_si_001.pdf]
